# Supplementary figures and images for: Stereoselective synthesis of 2,5-disubstituted morpholines using a palladium-catalyzed hydroamination reaction
Source: Royal Society of Chemistry journal article supplement (doi:10.1039/c3cc44117b), 2013-01-01

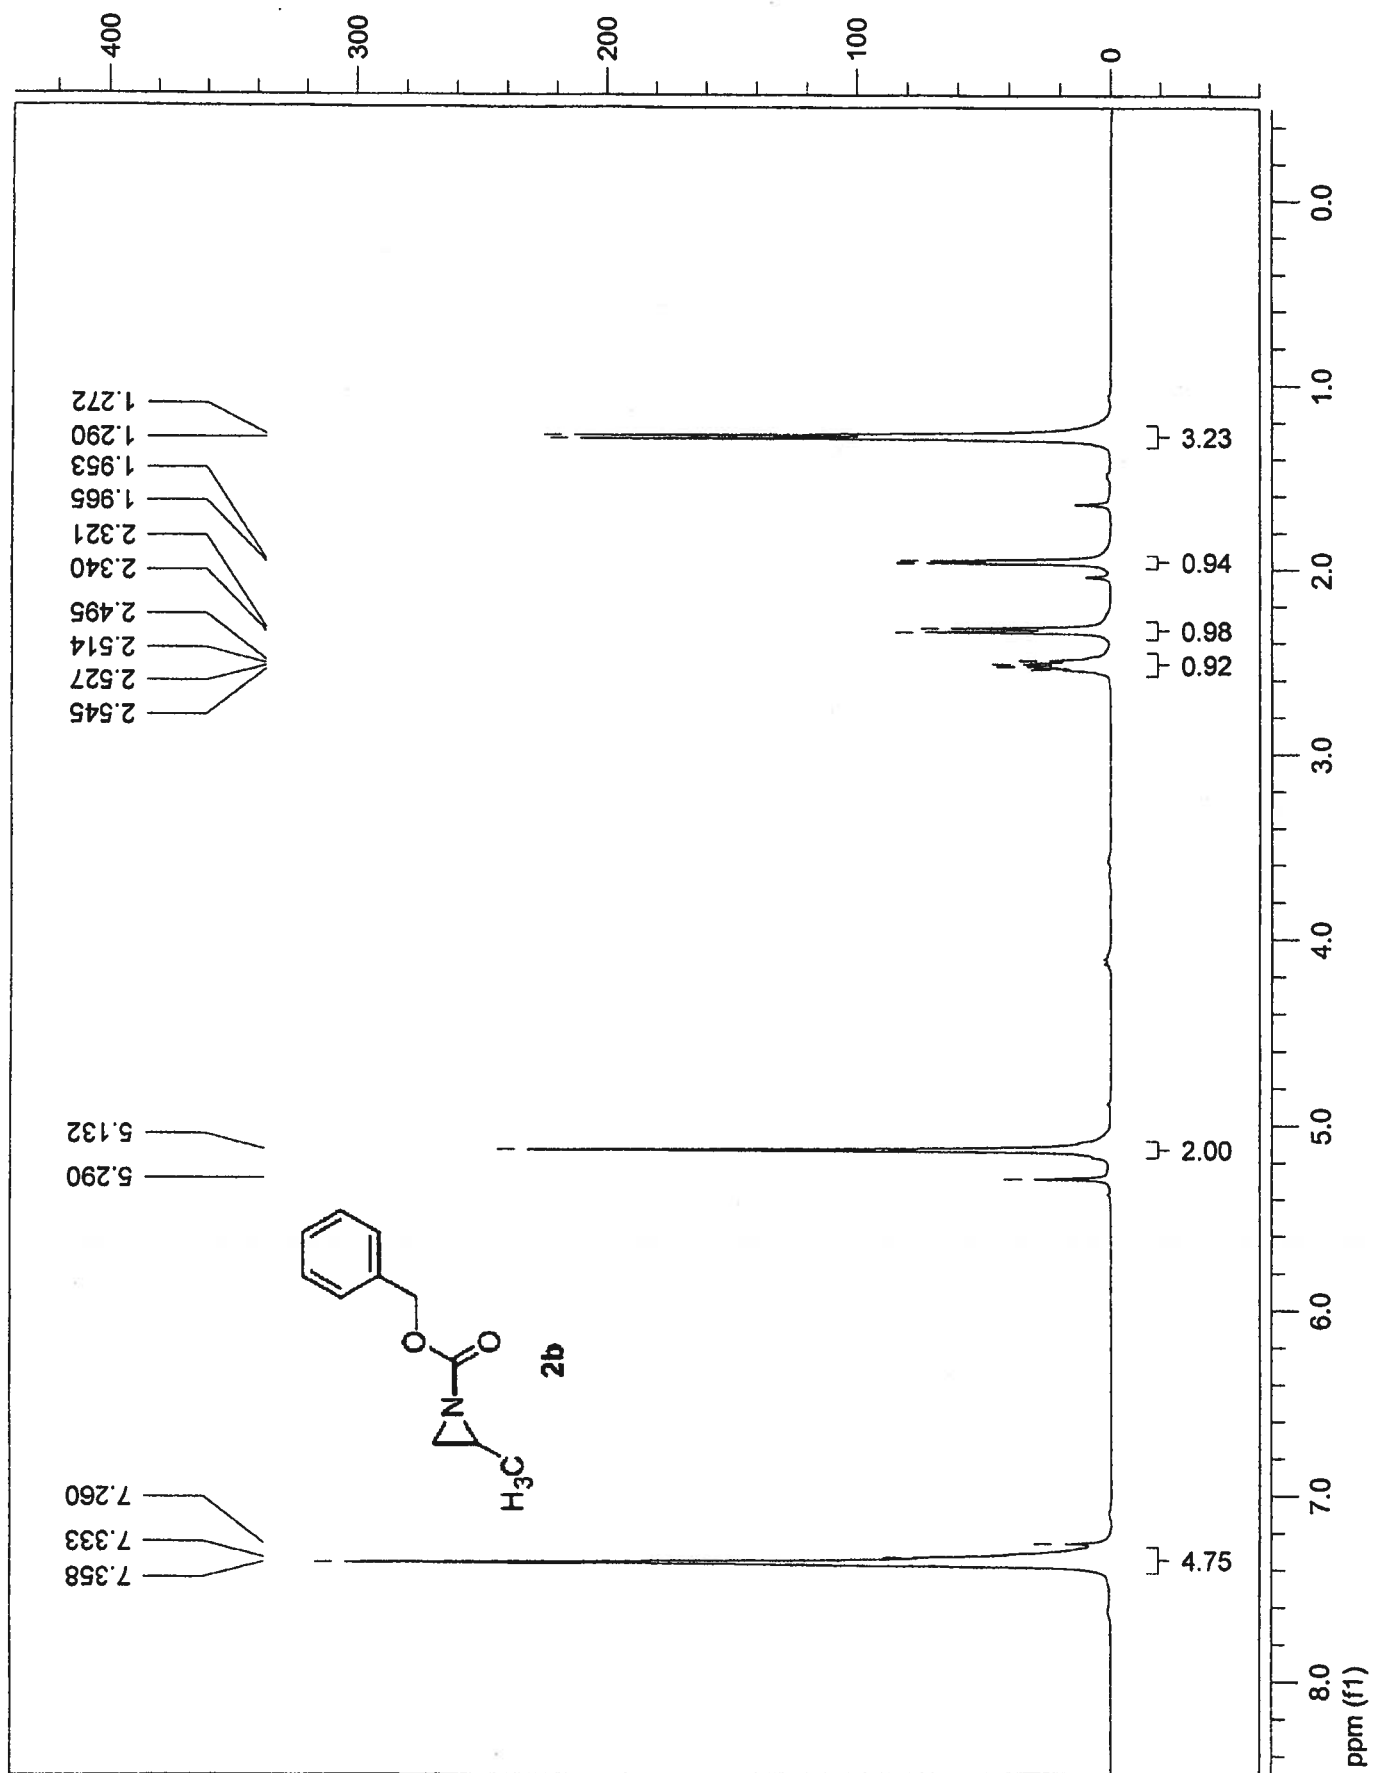

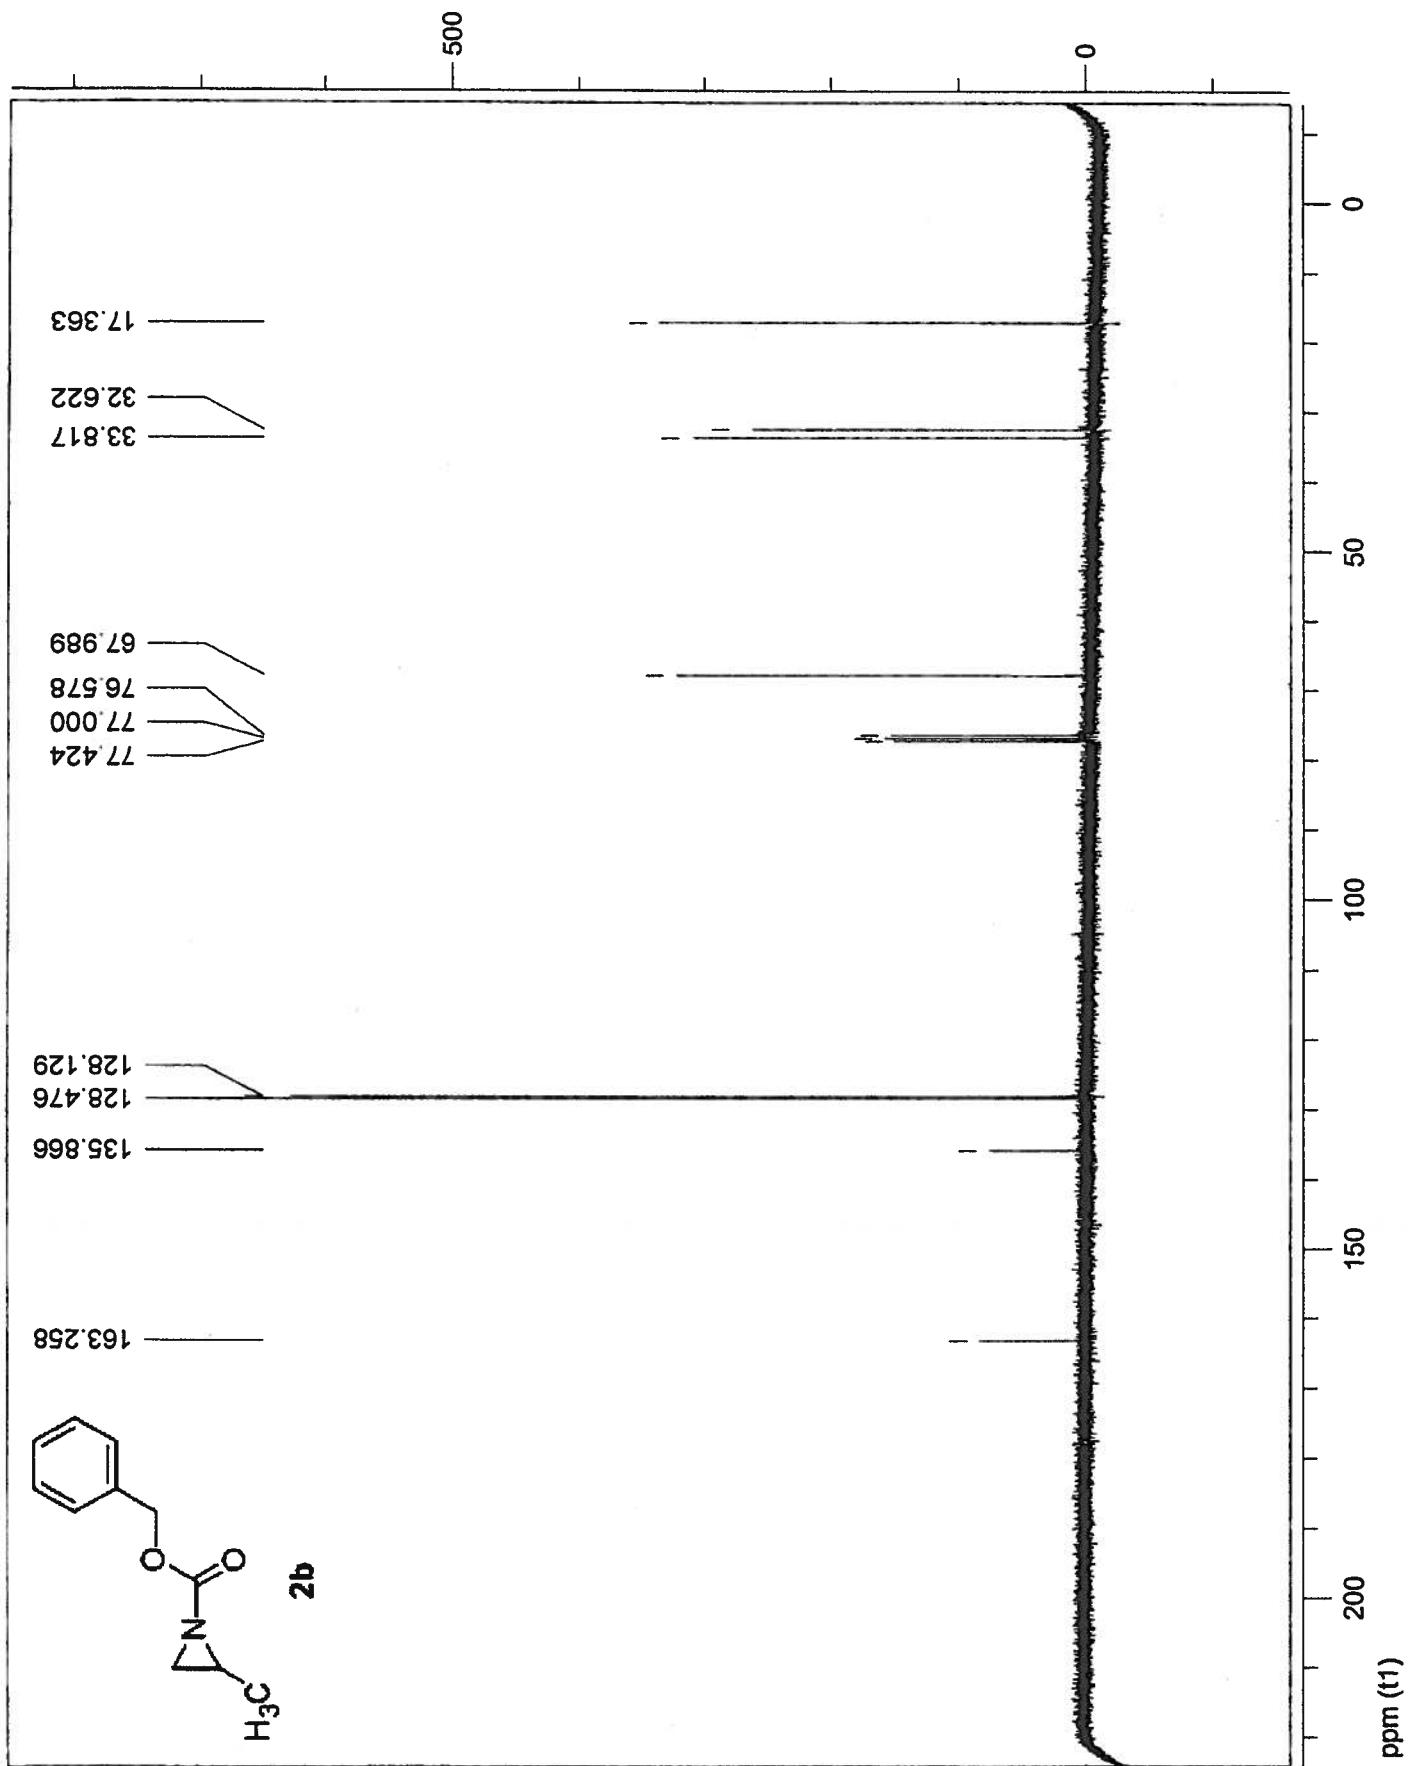

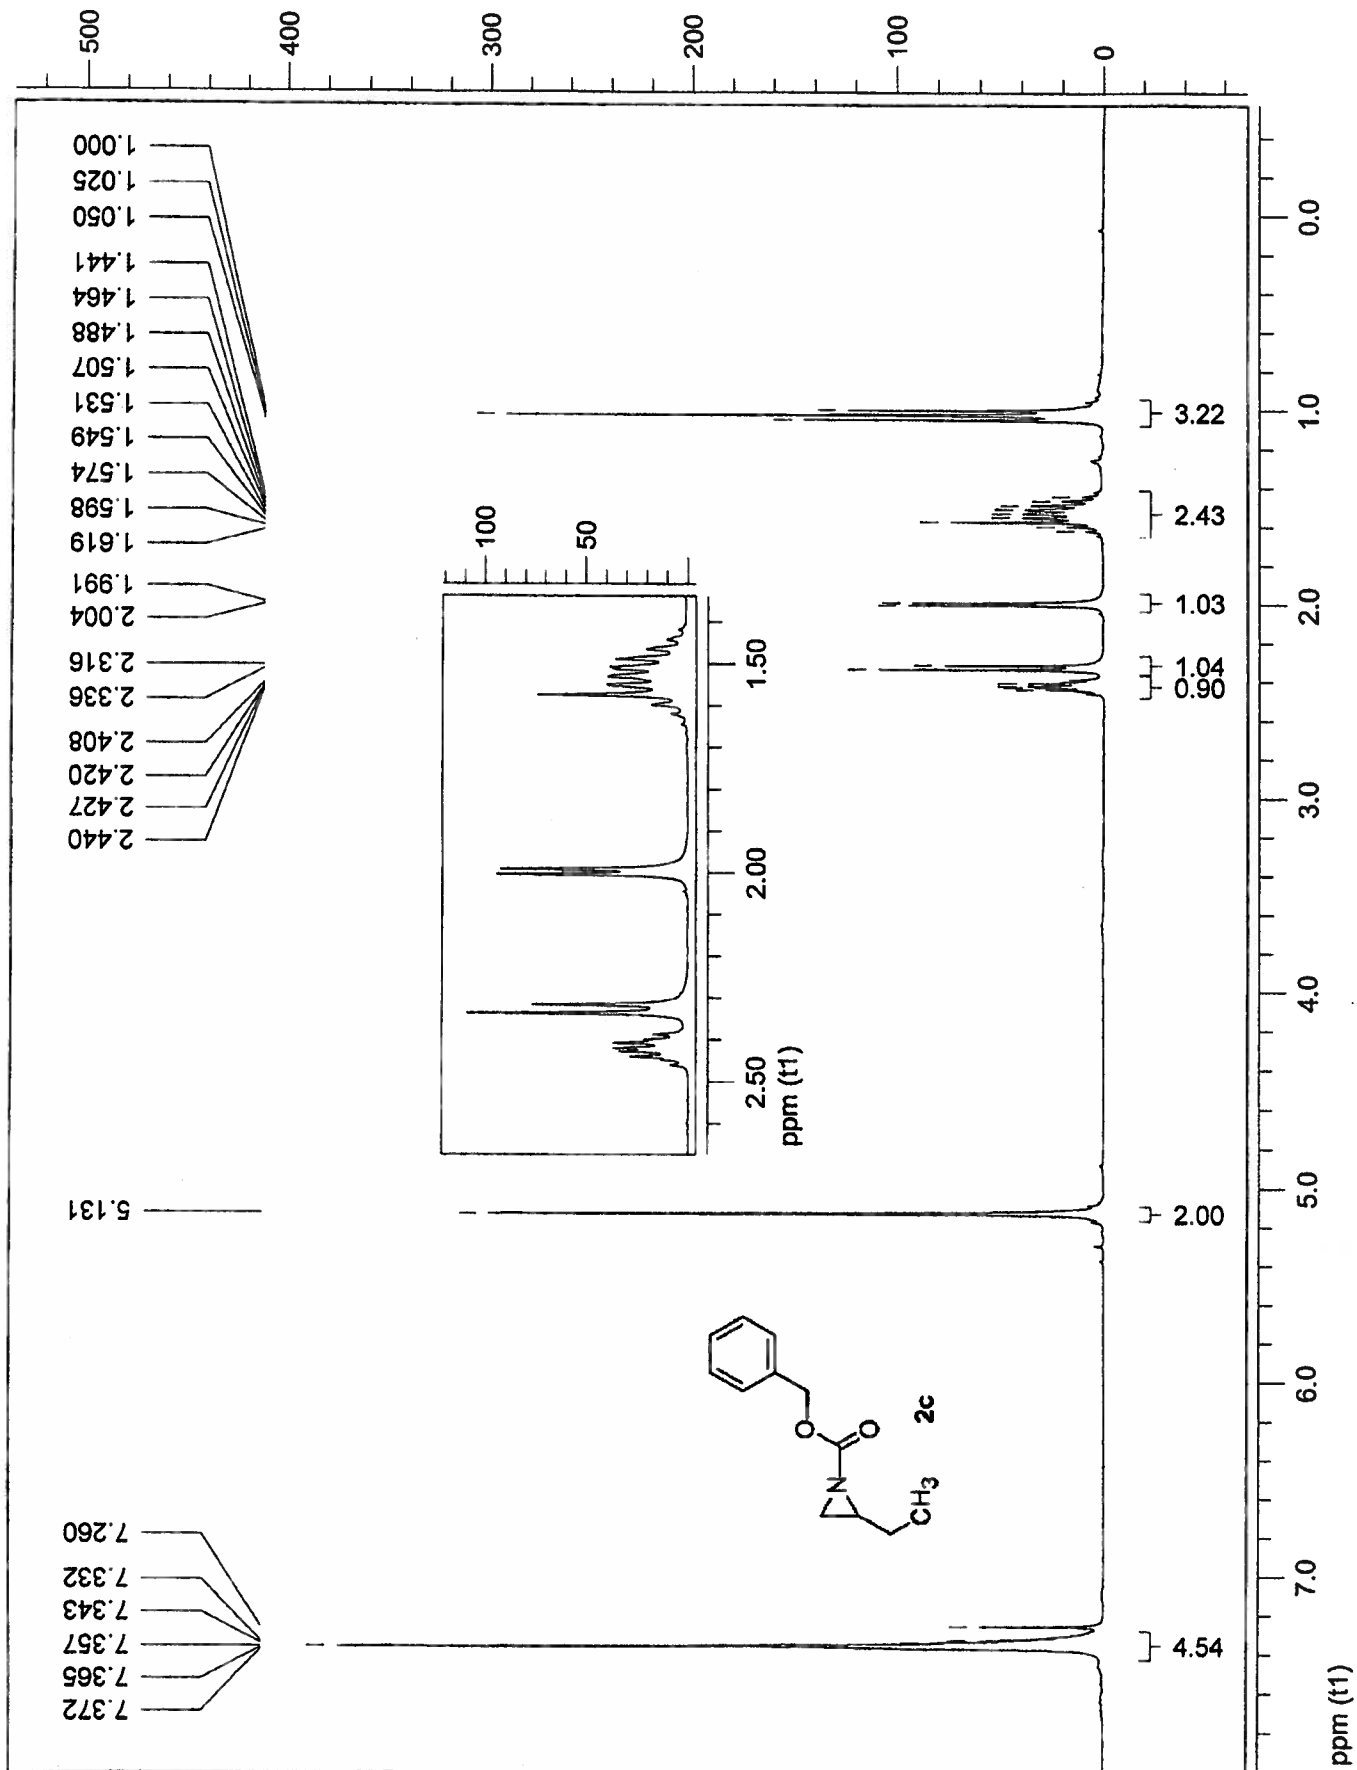

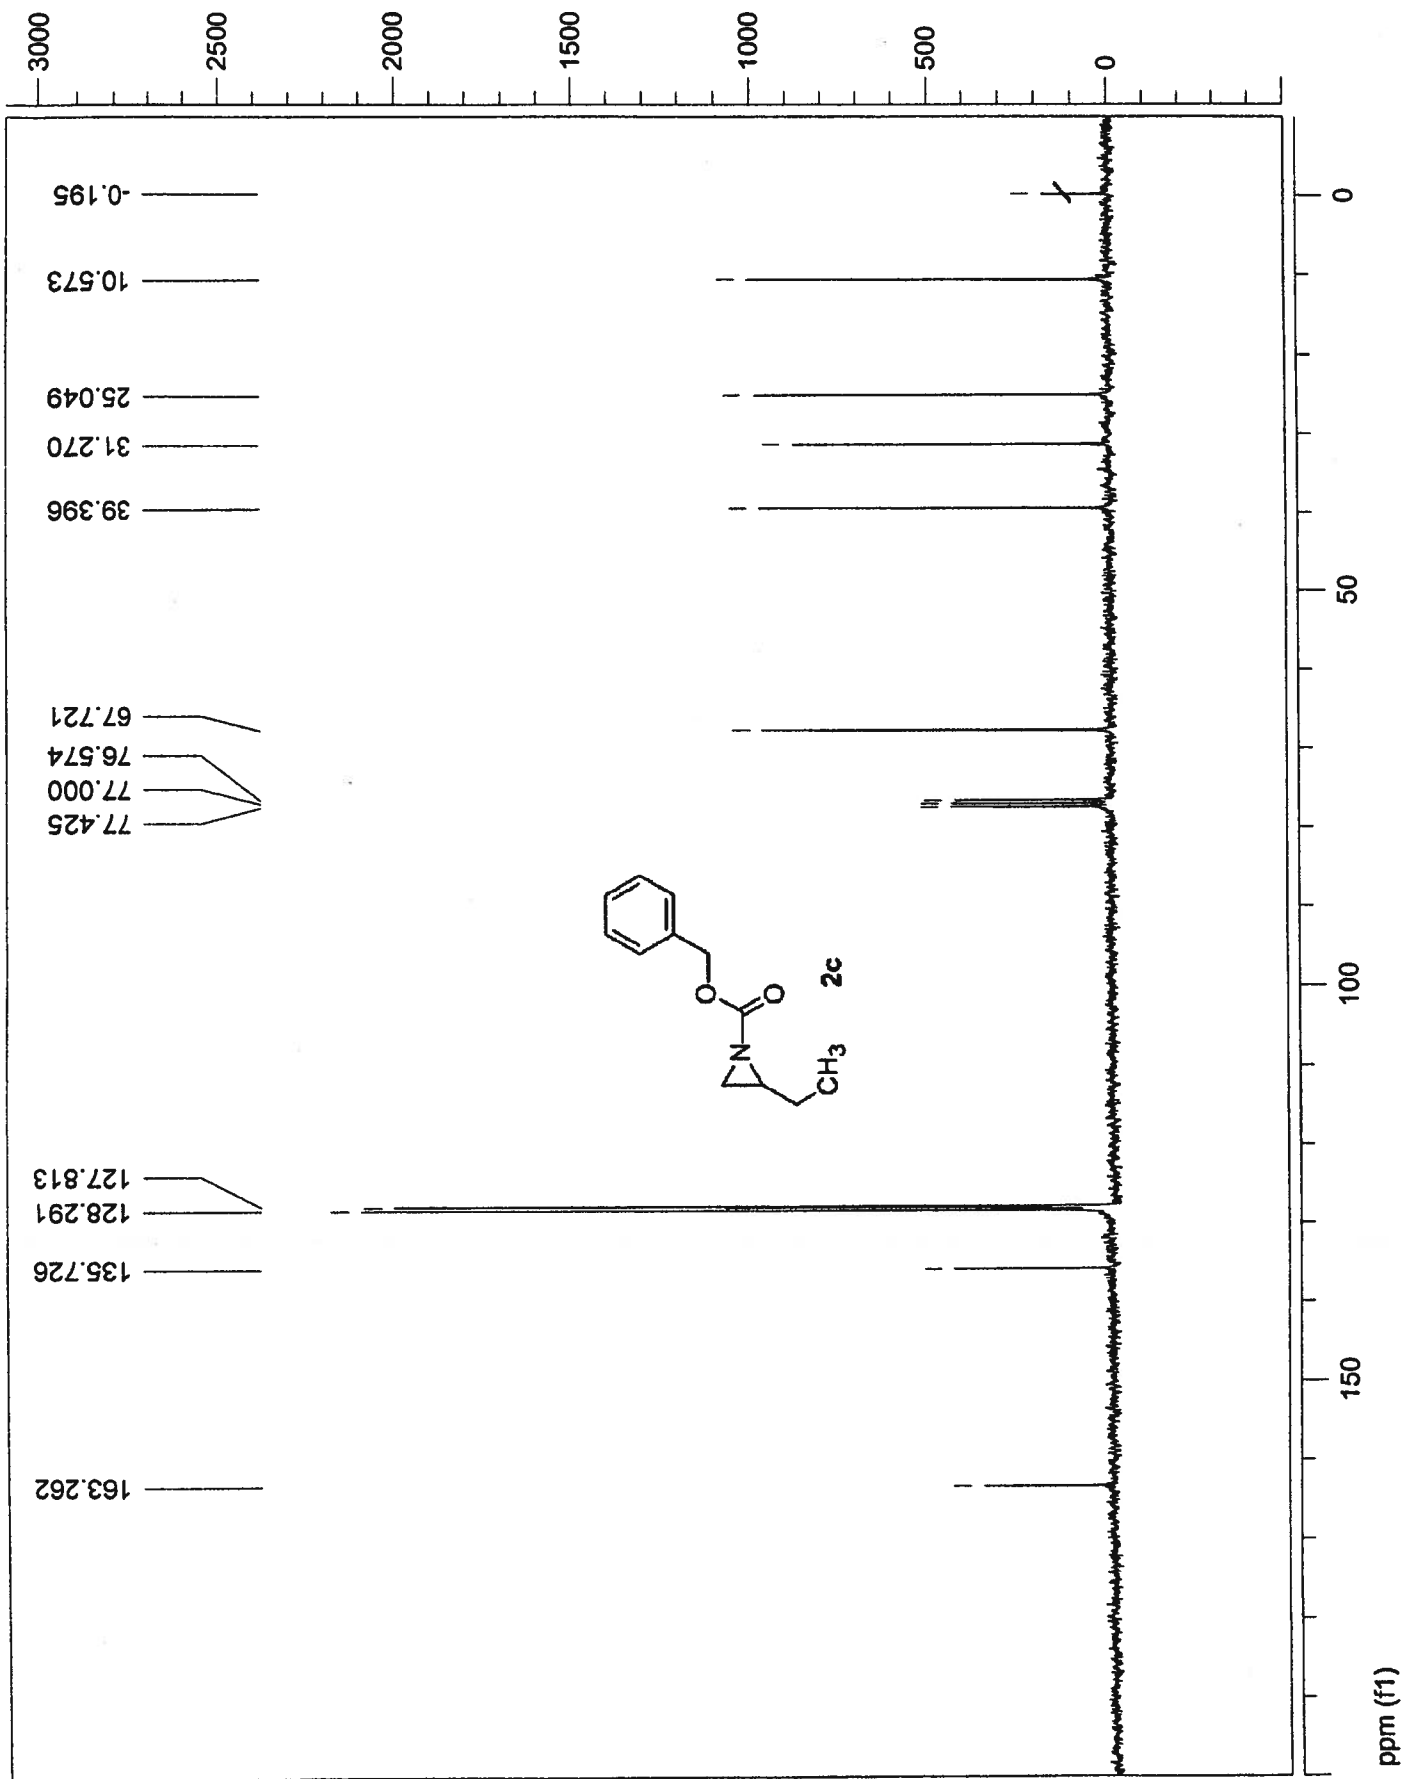

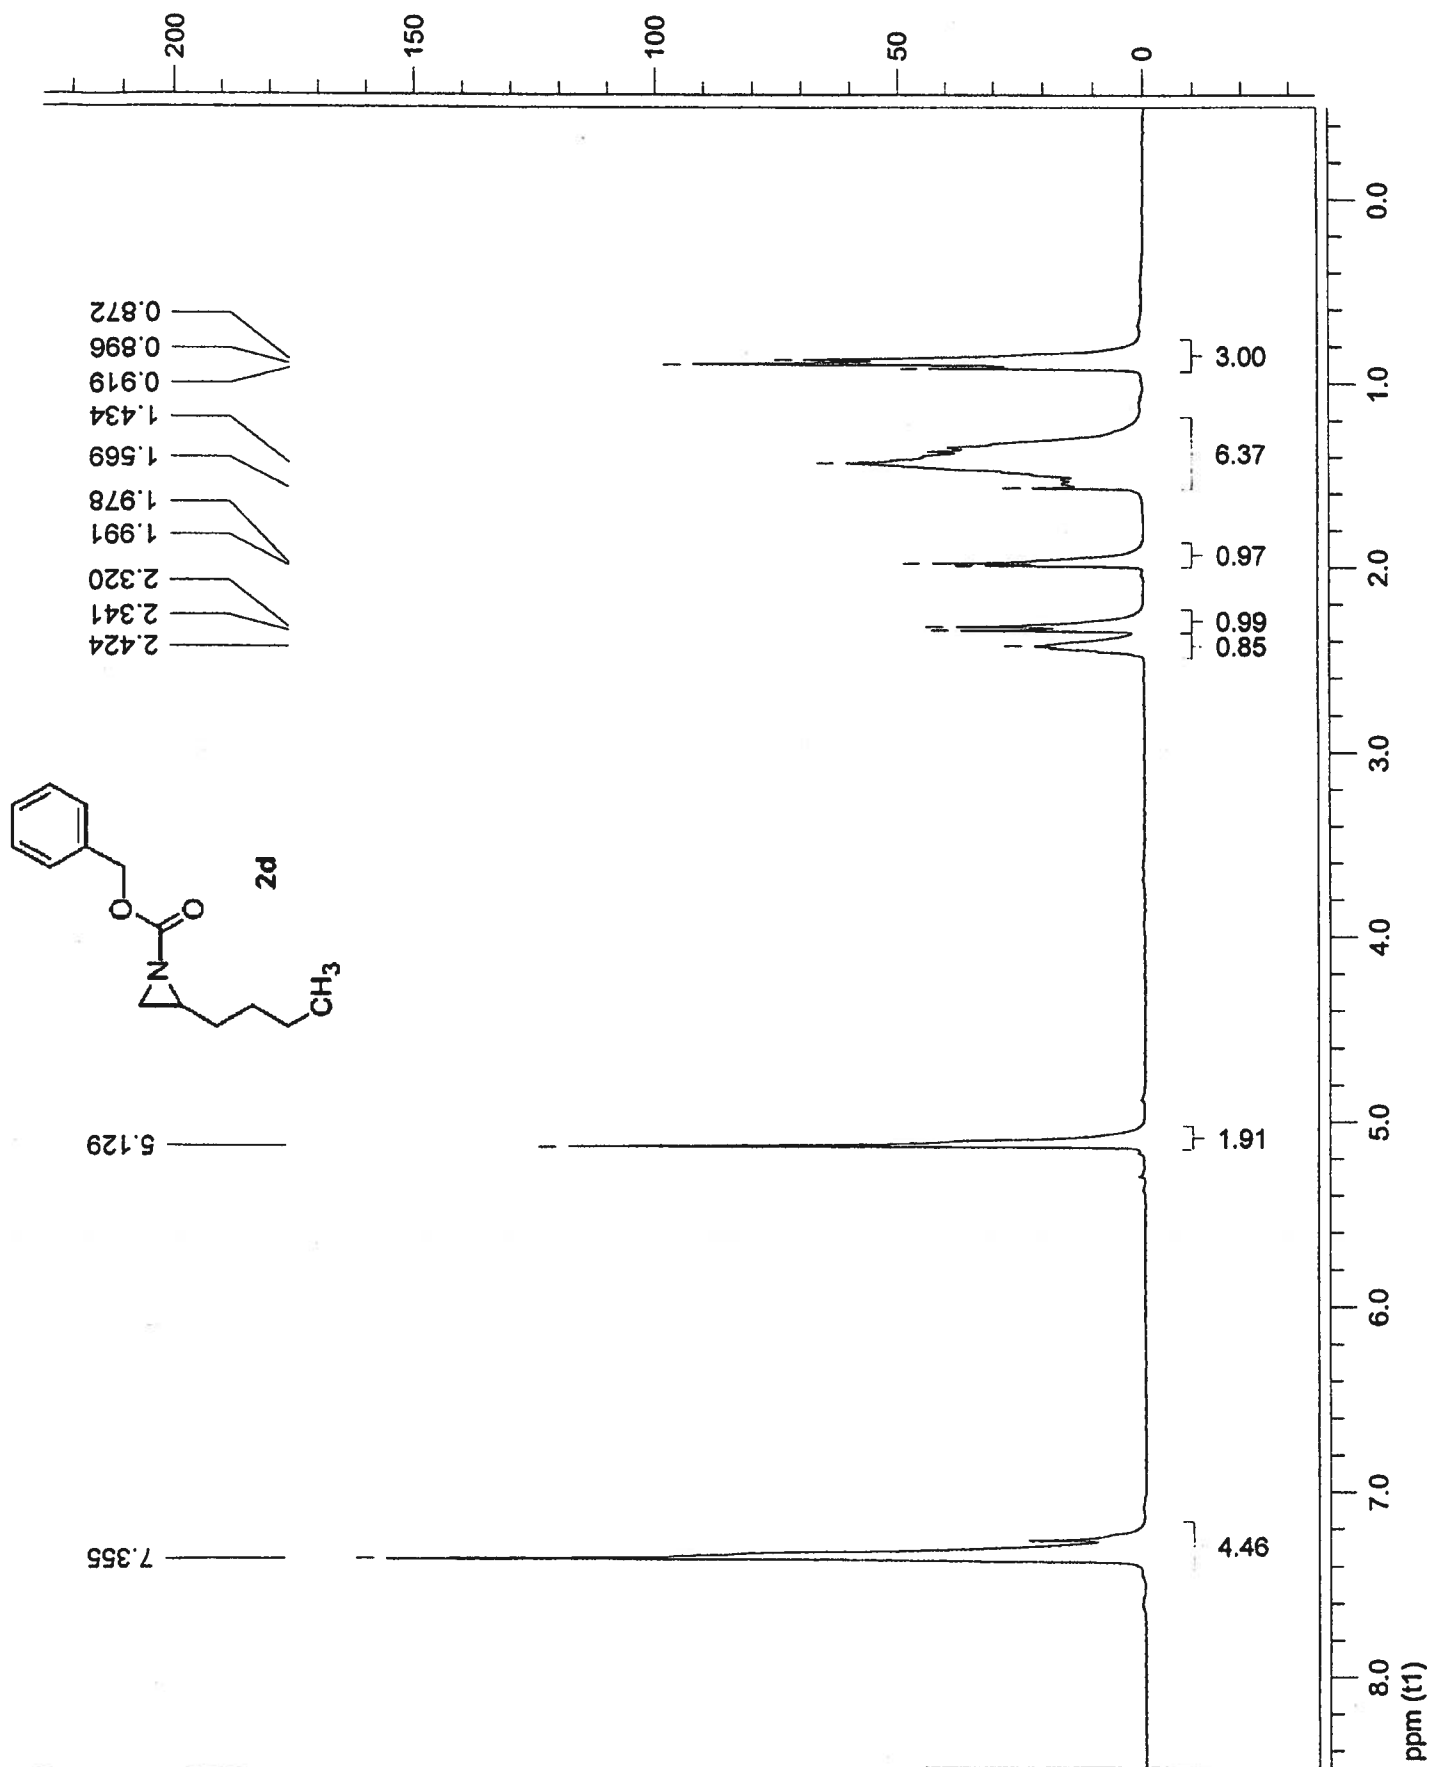

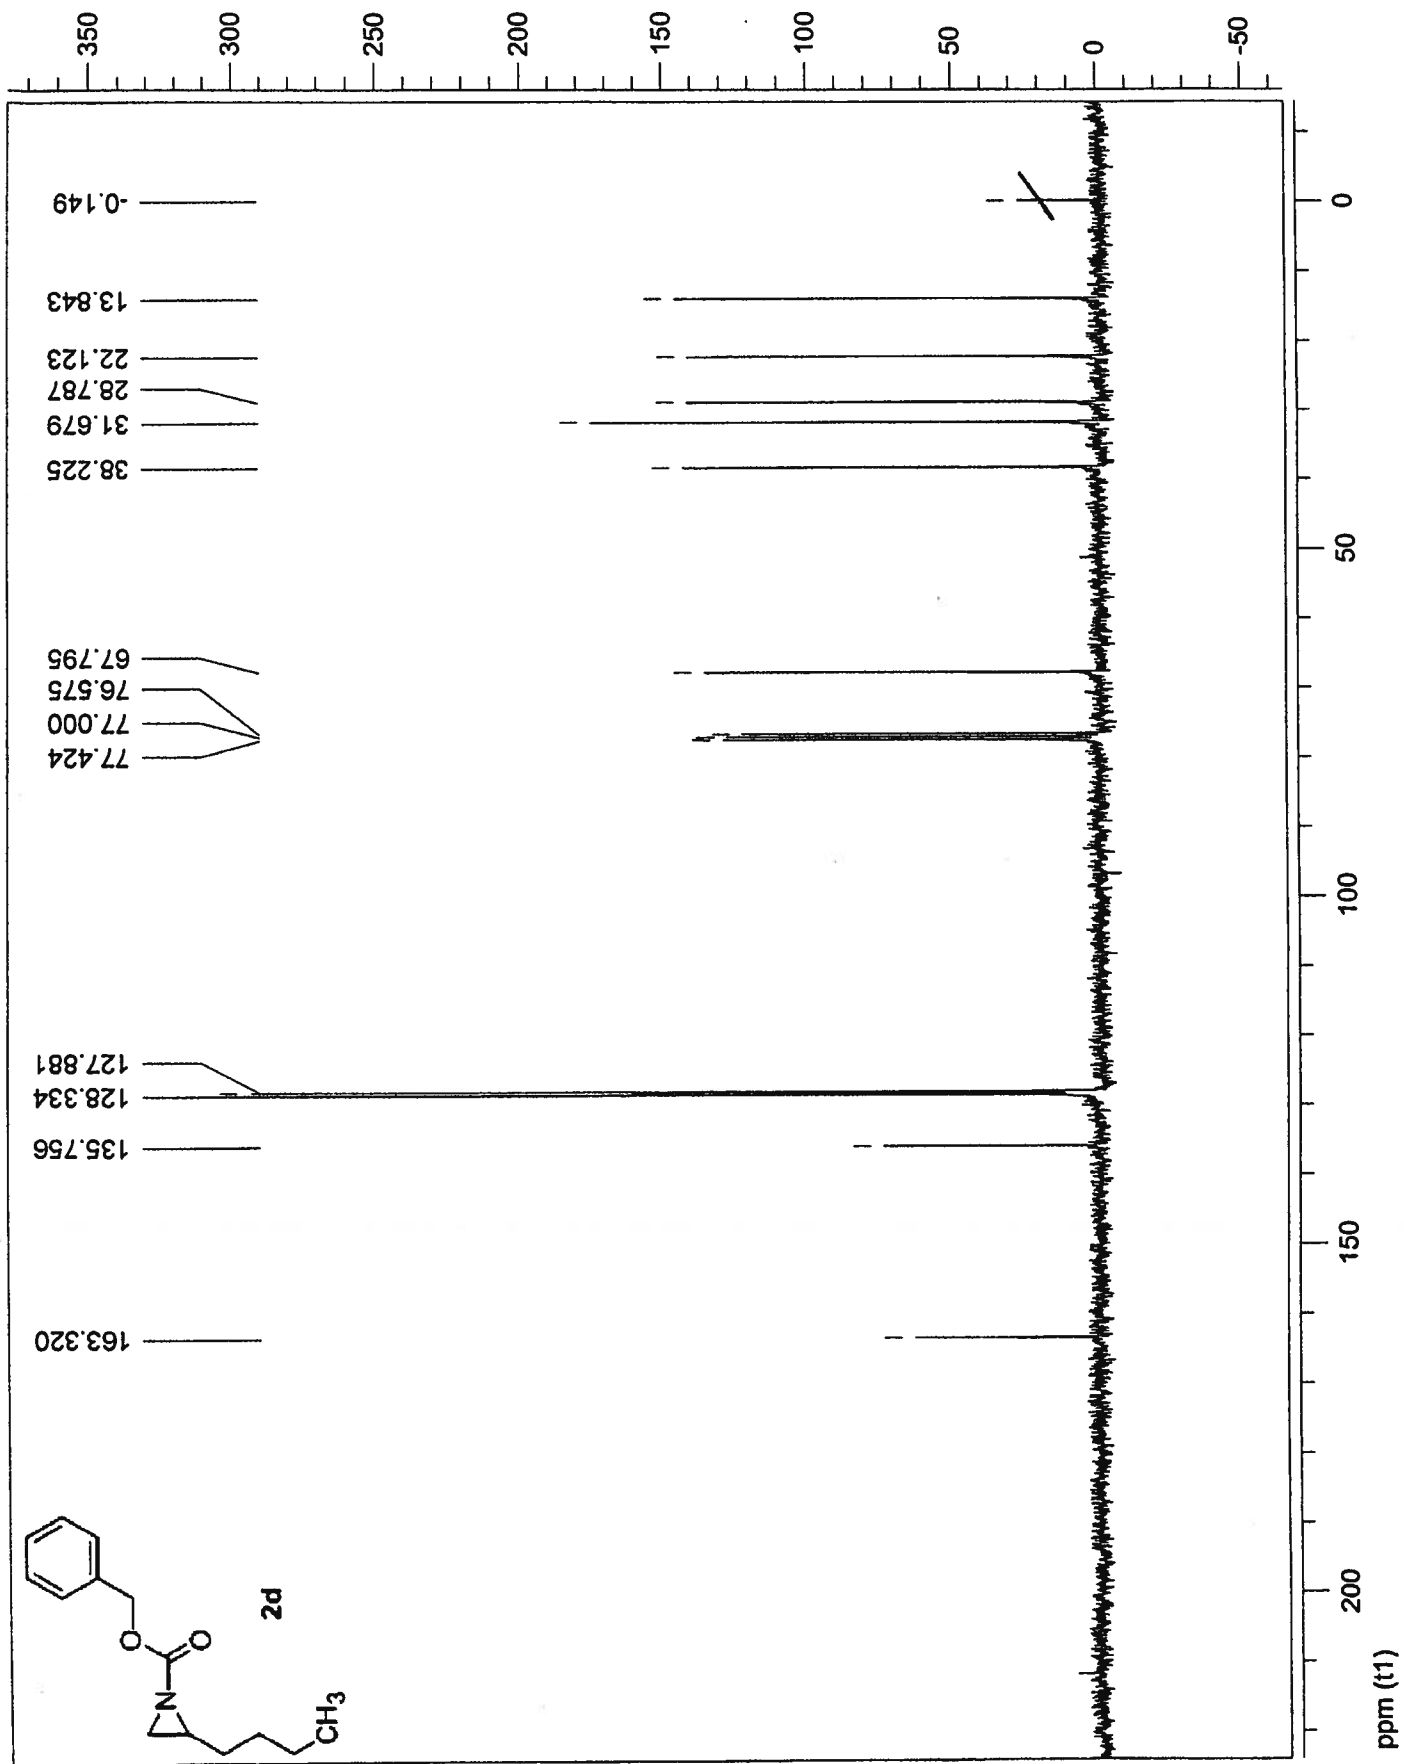

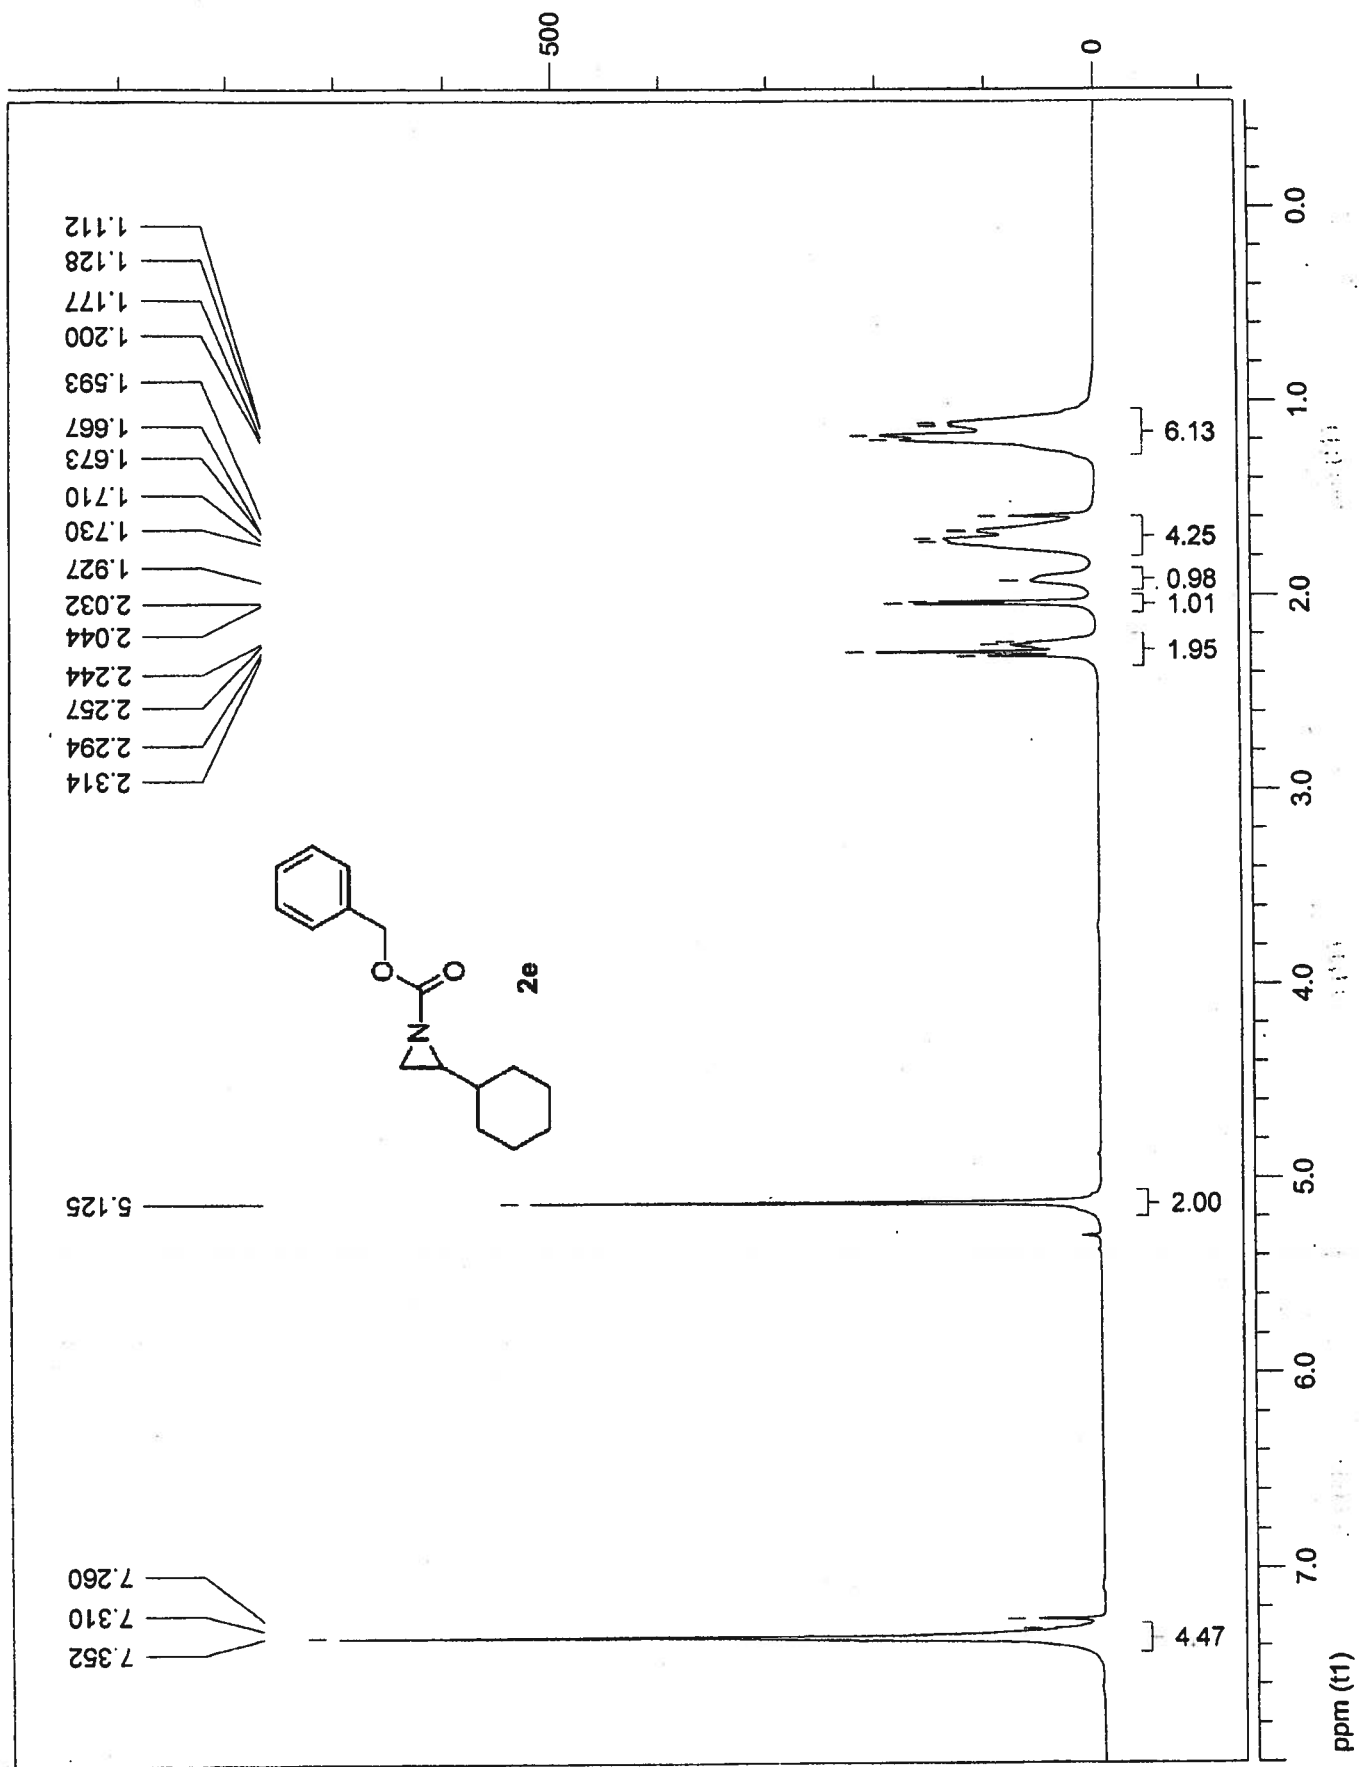

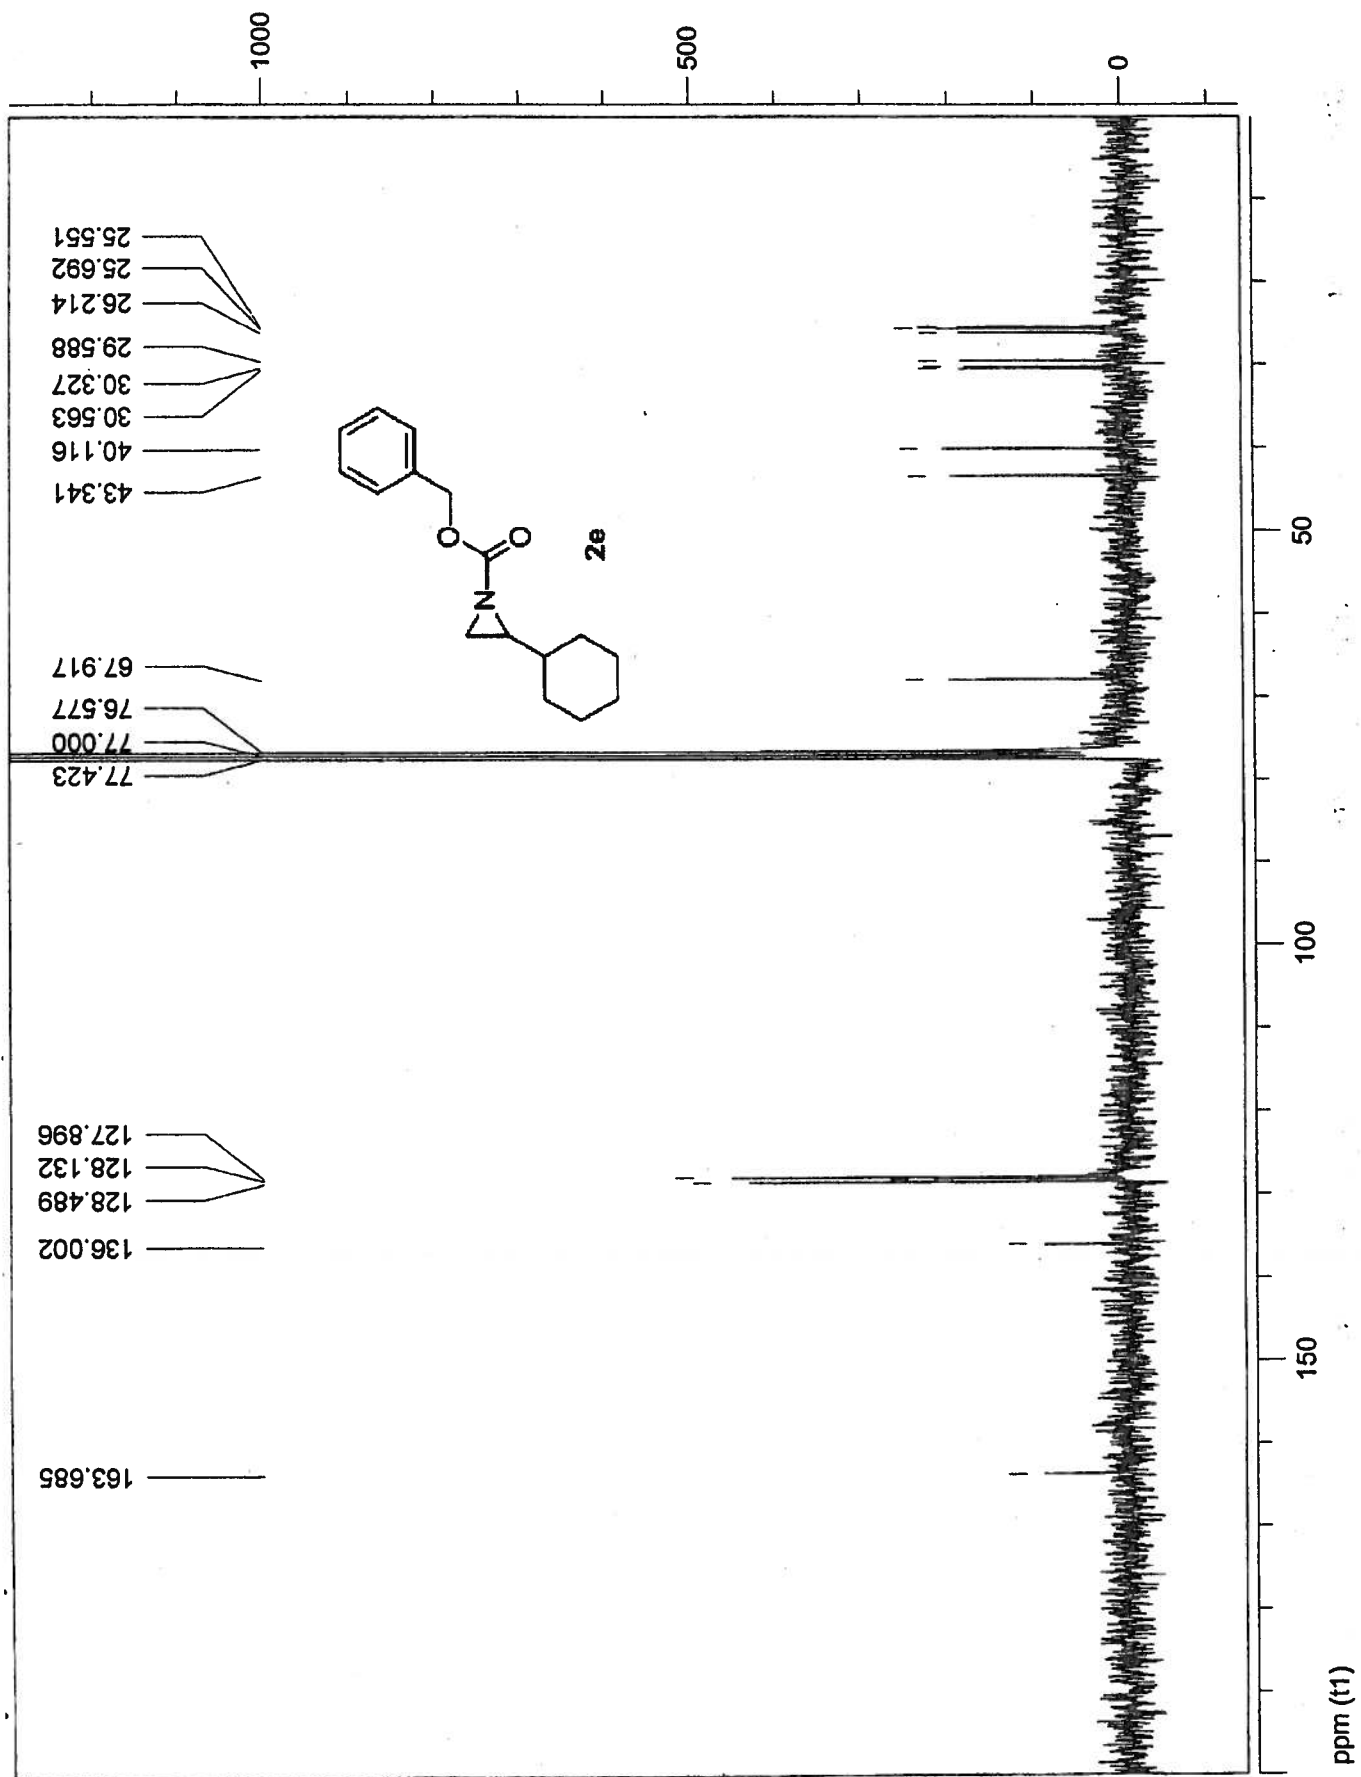



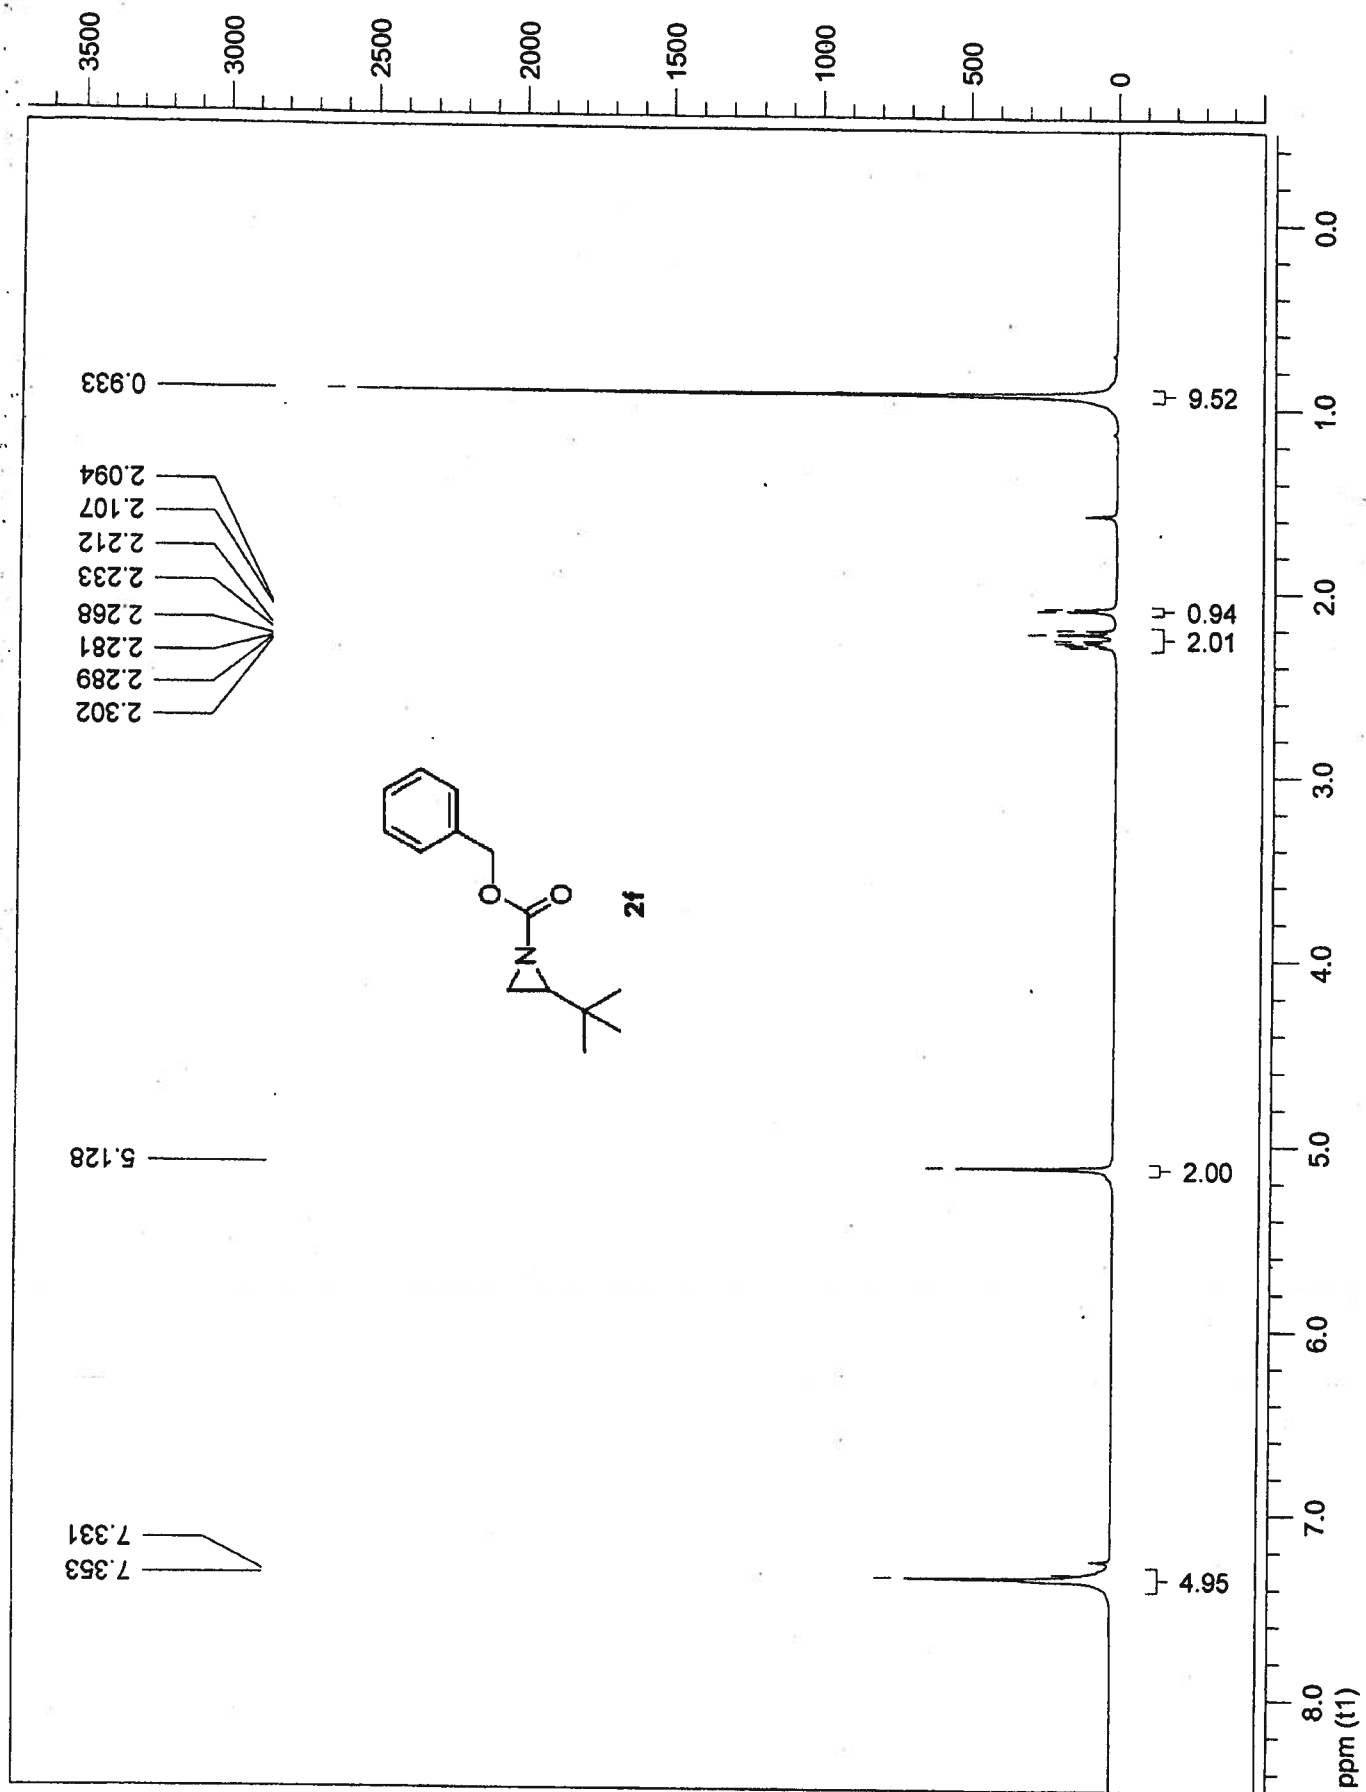

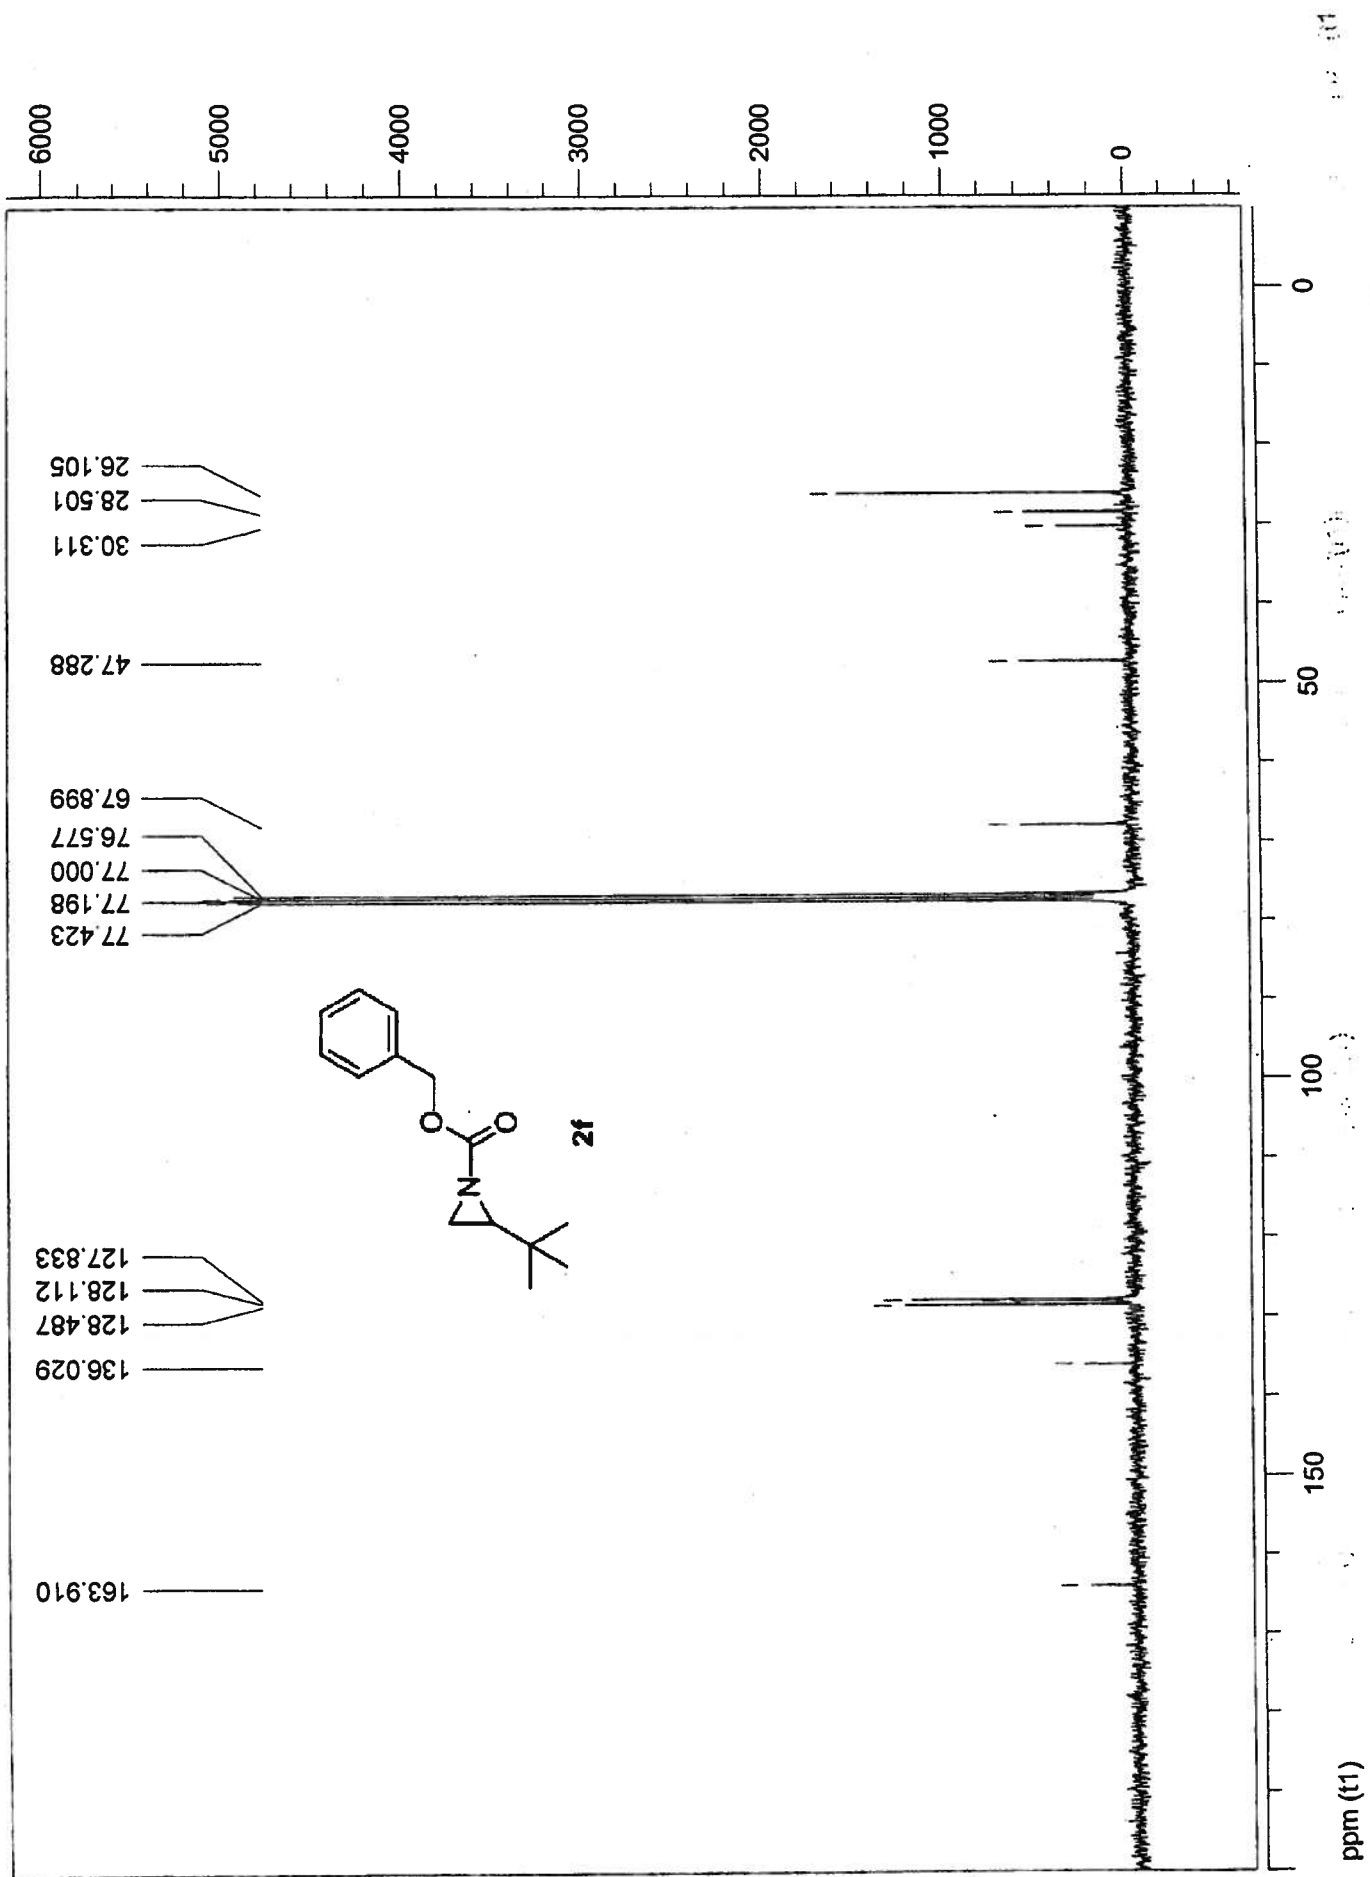

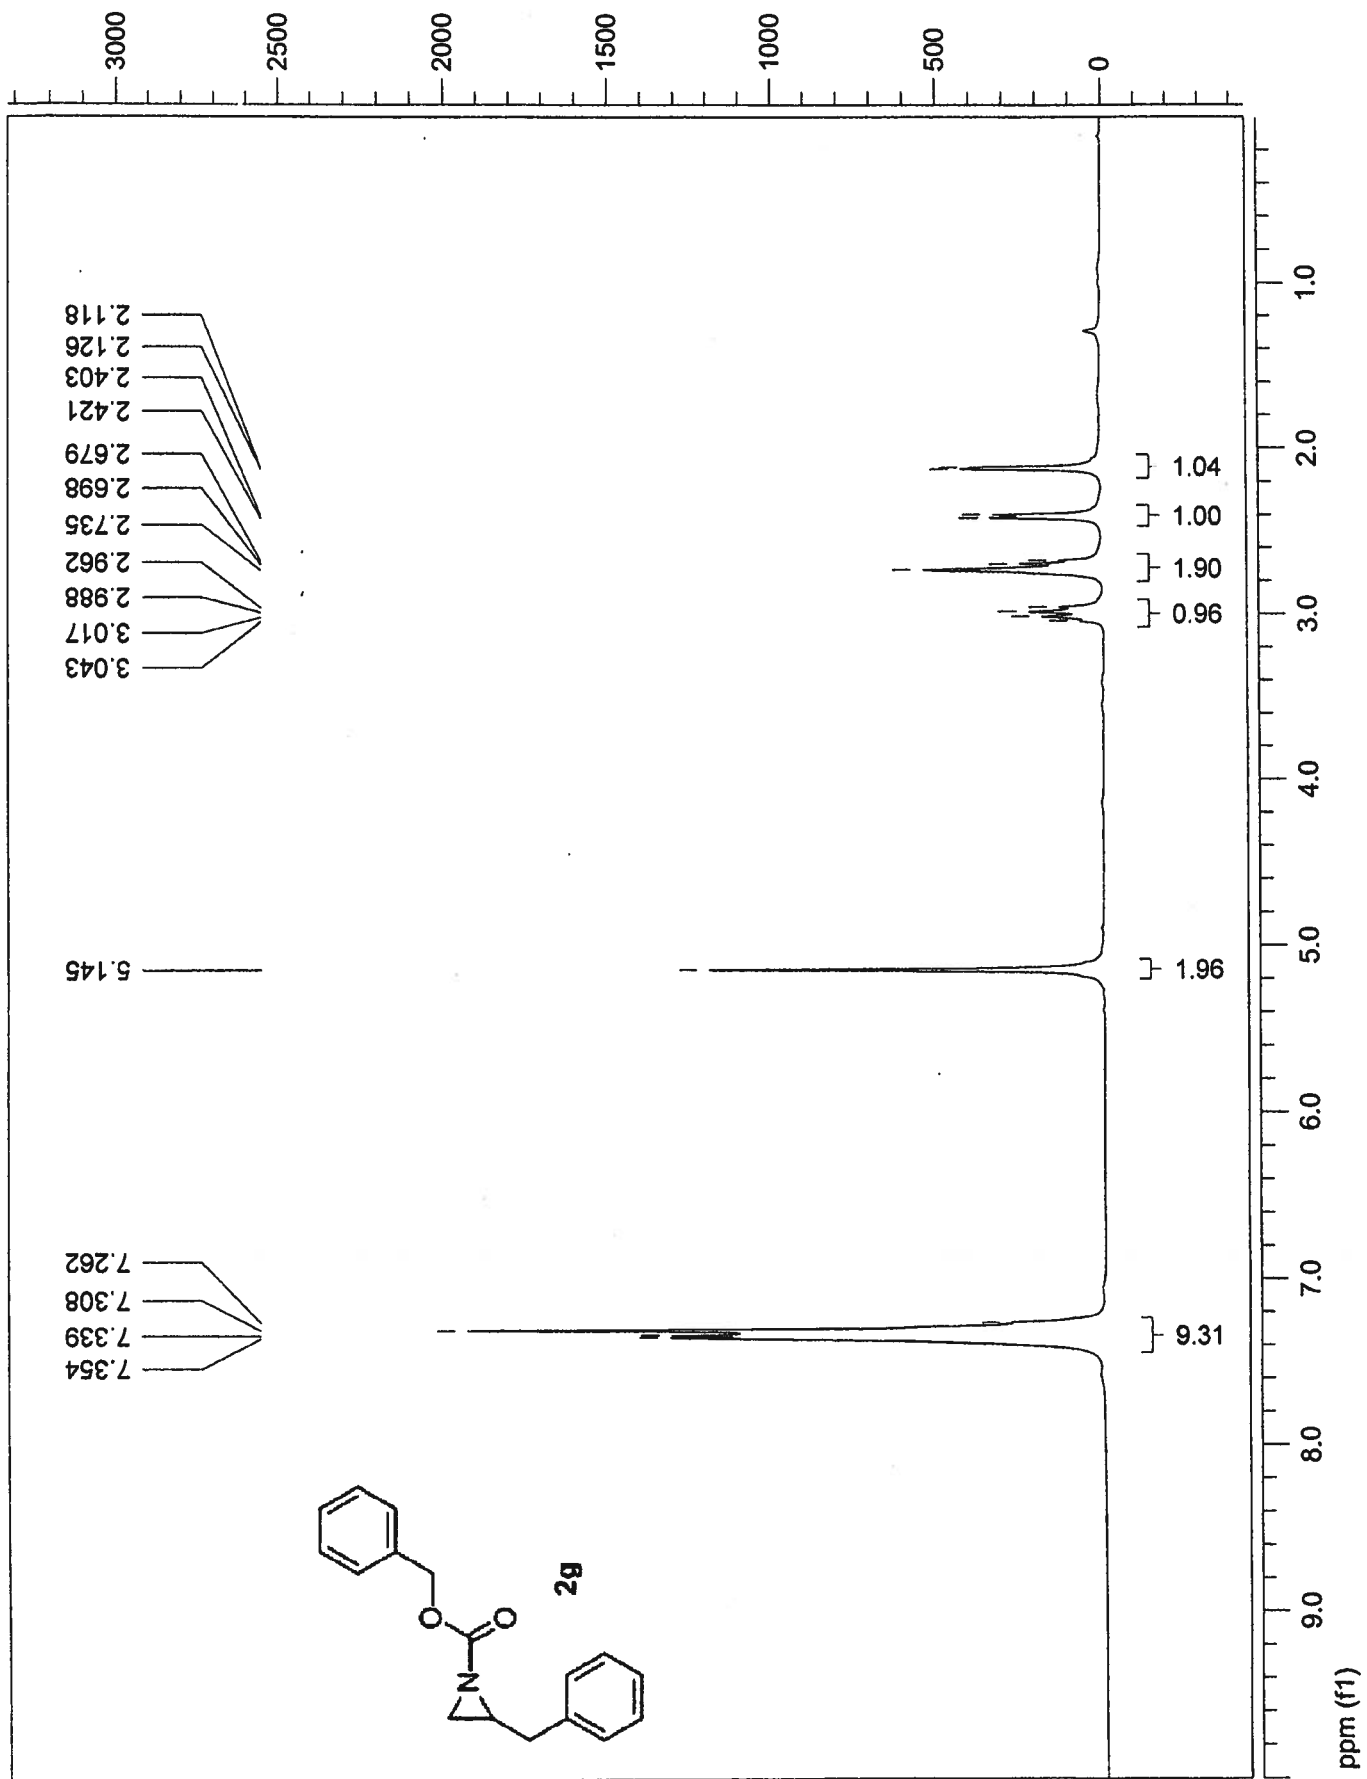

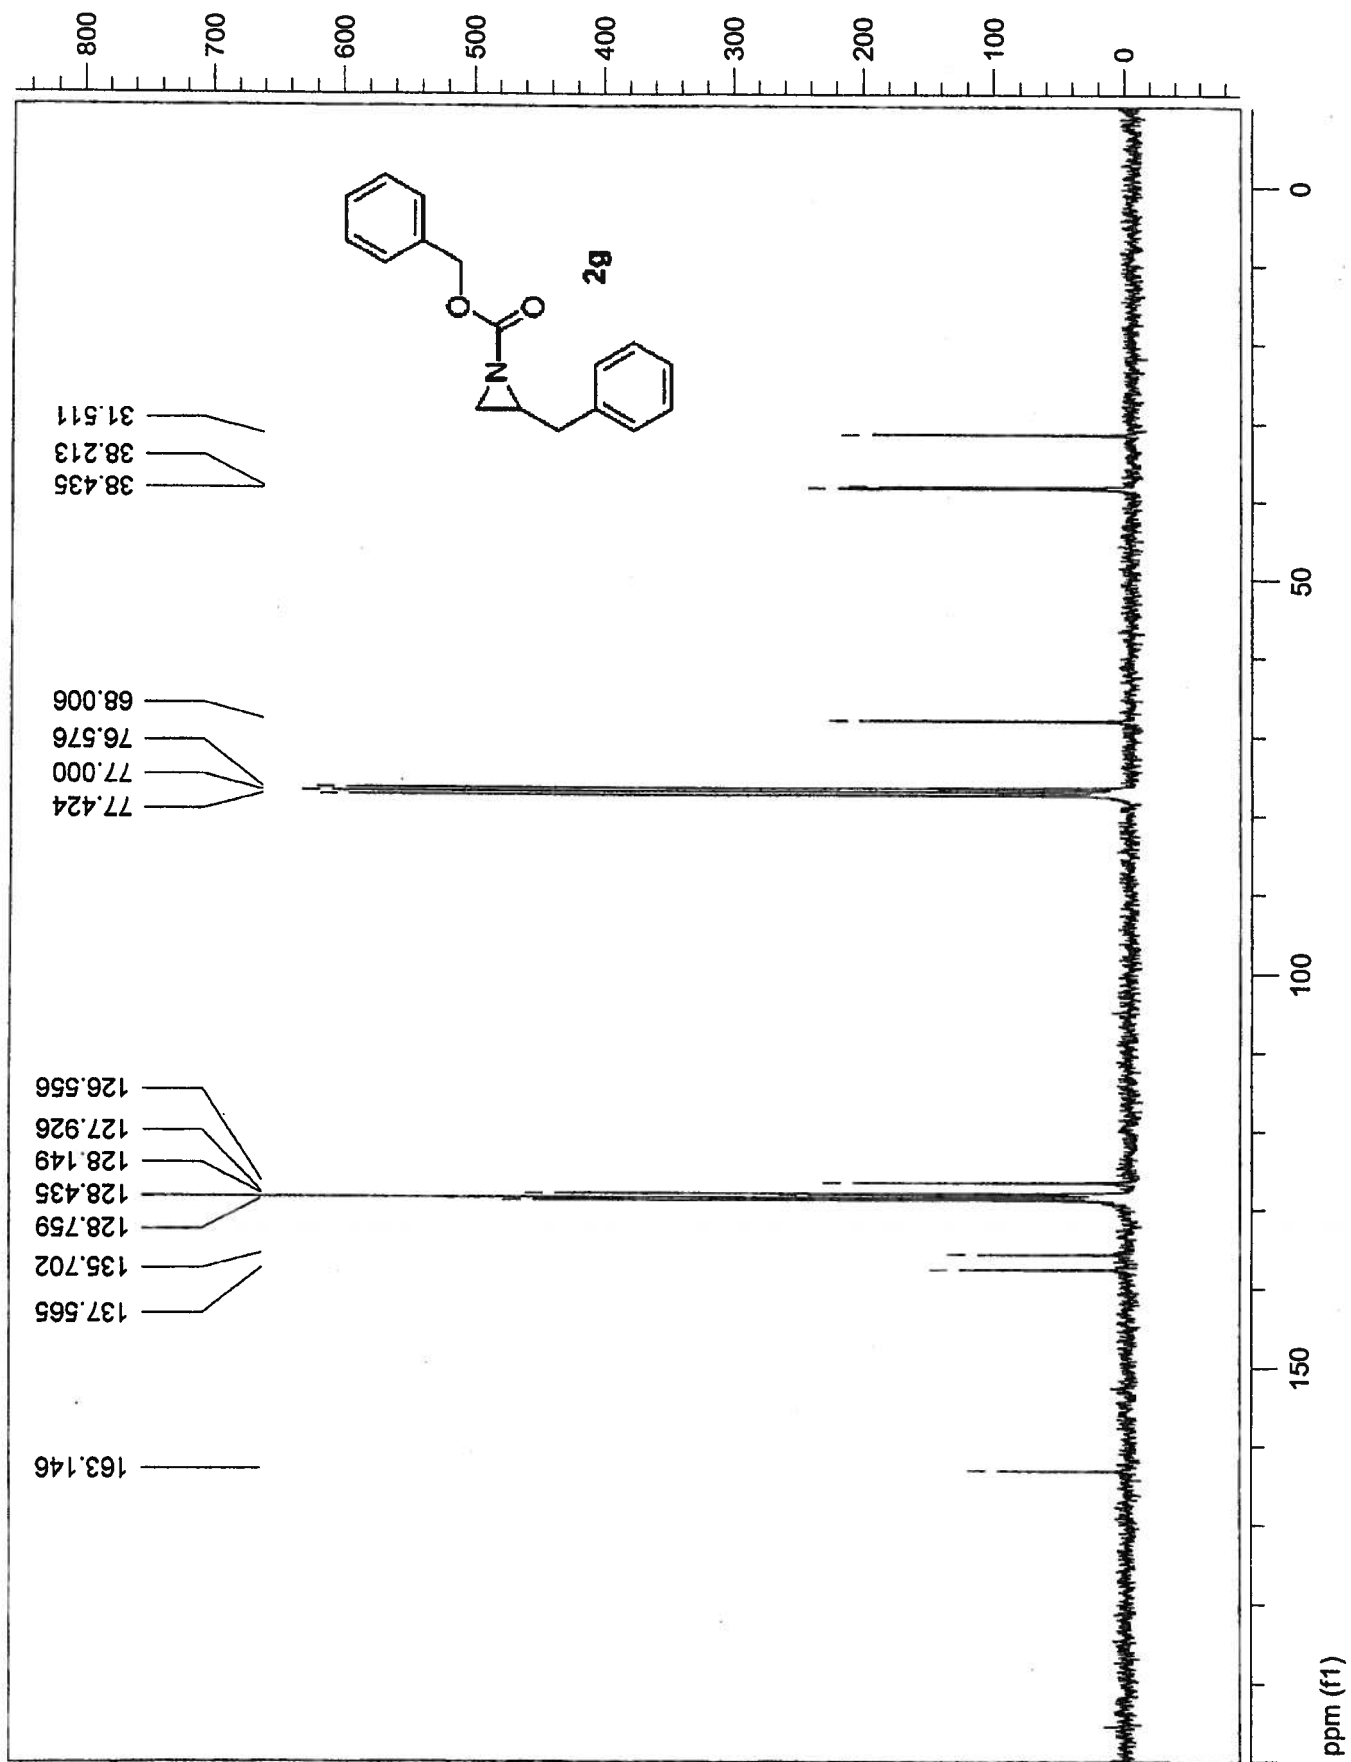

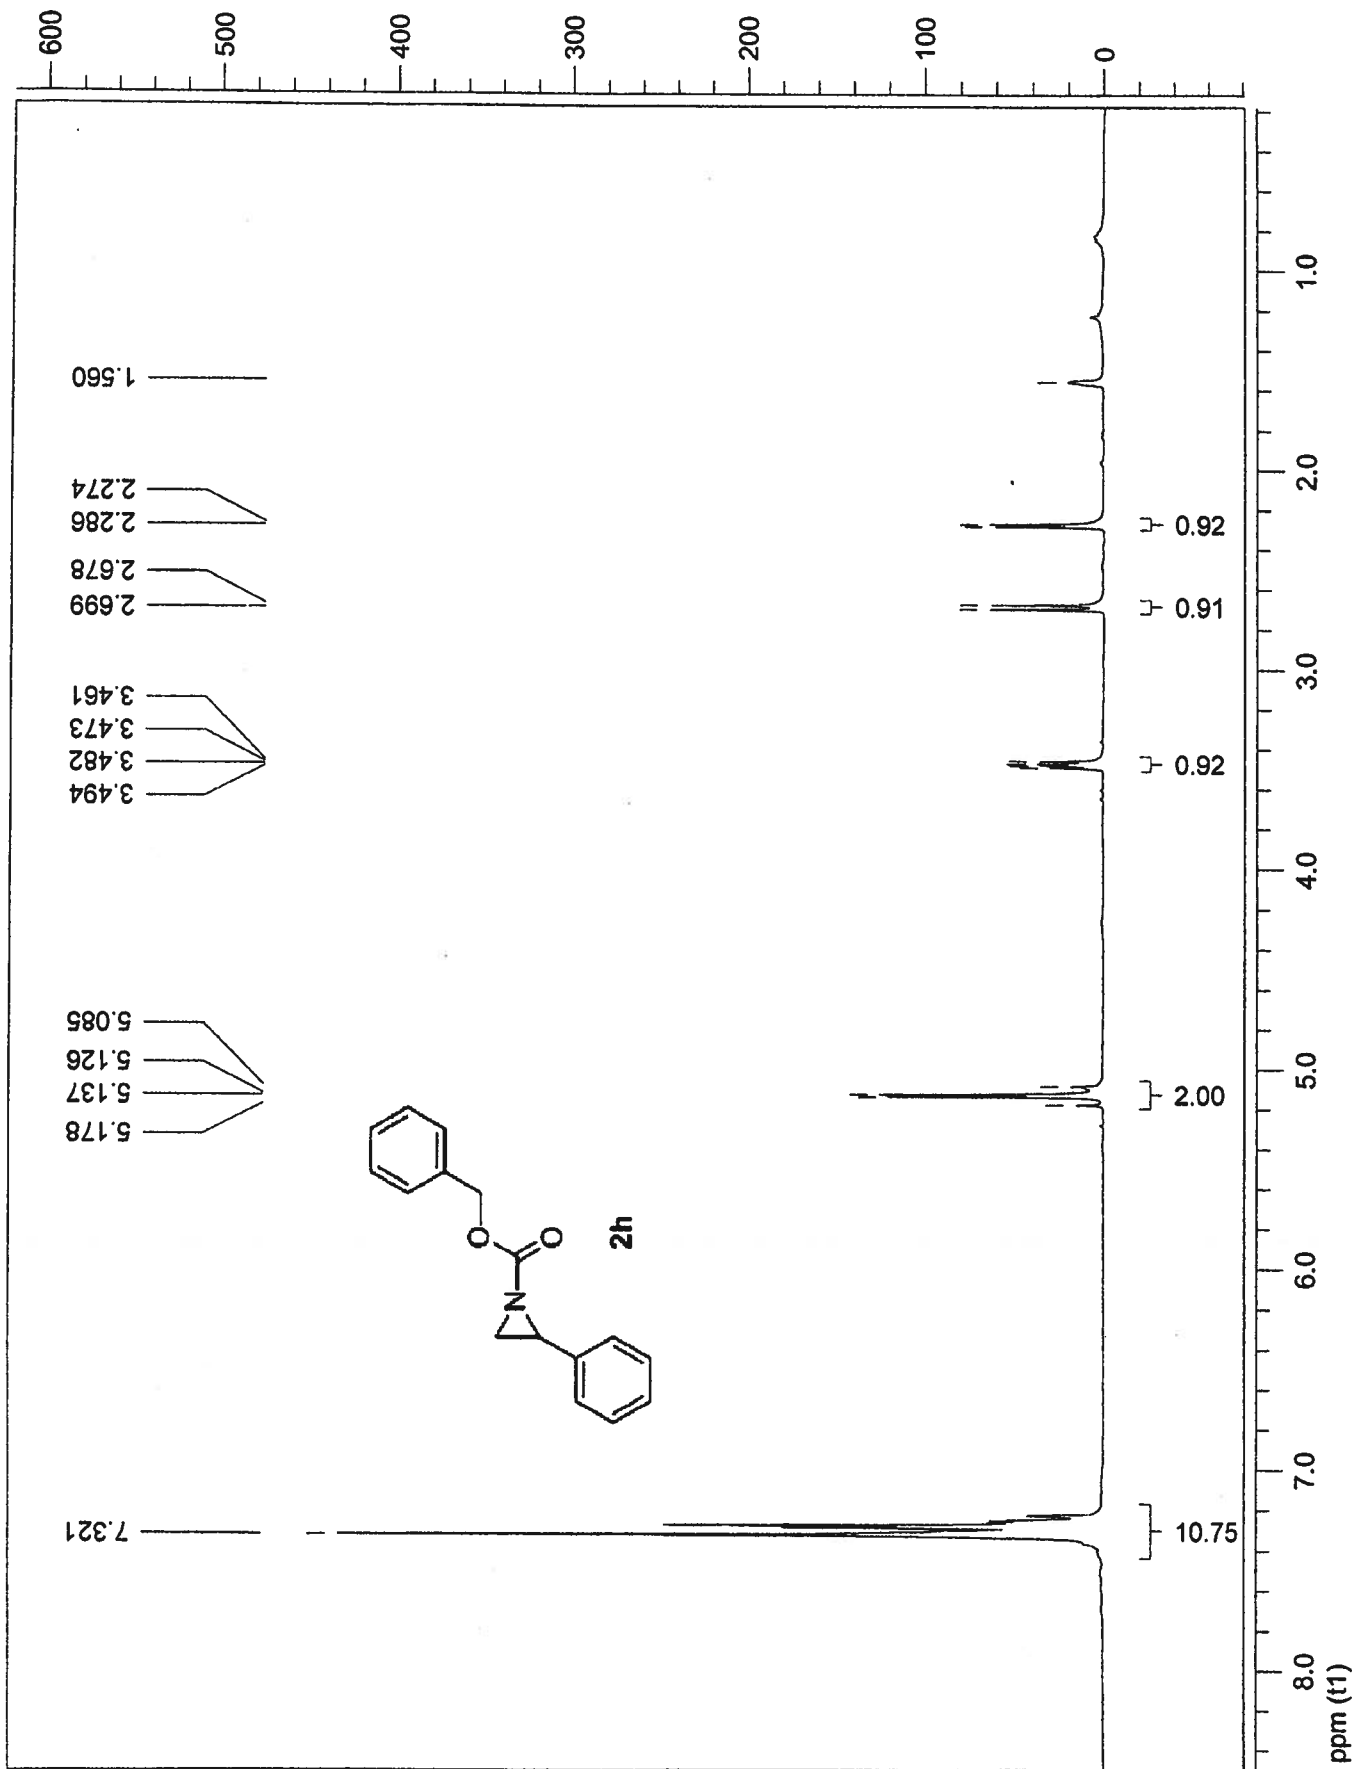

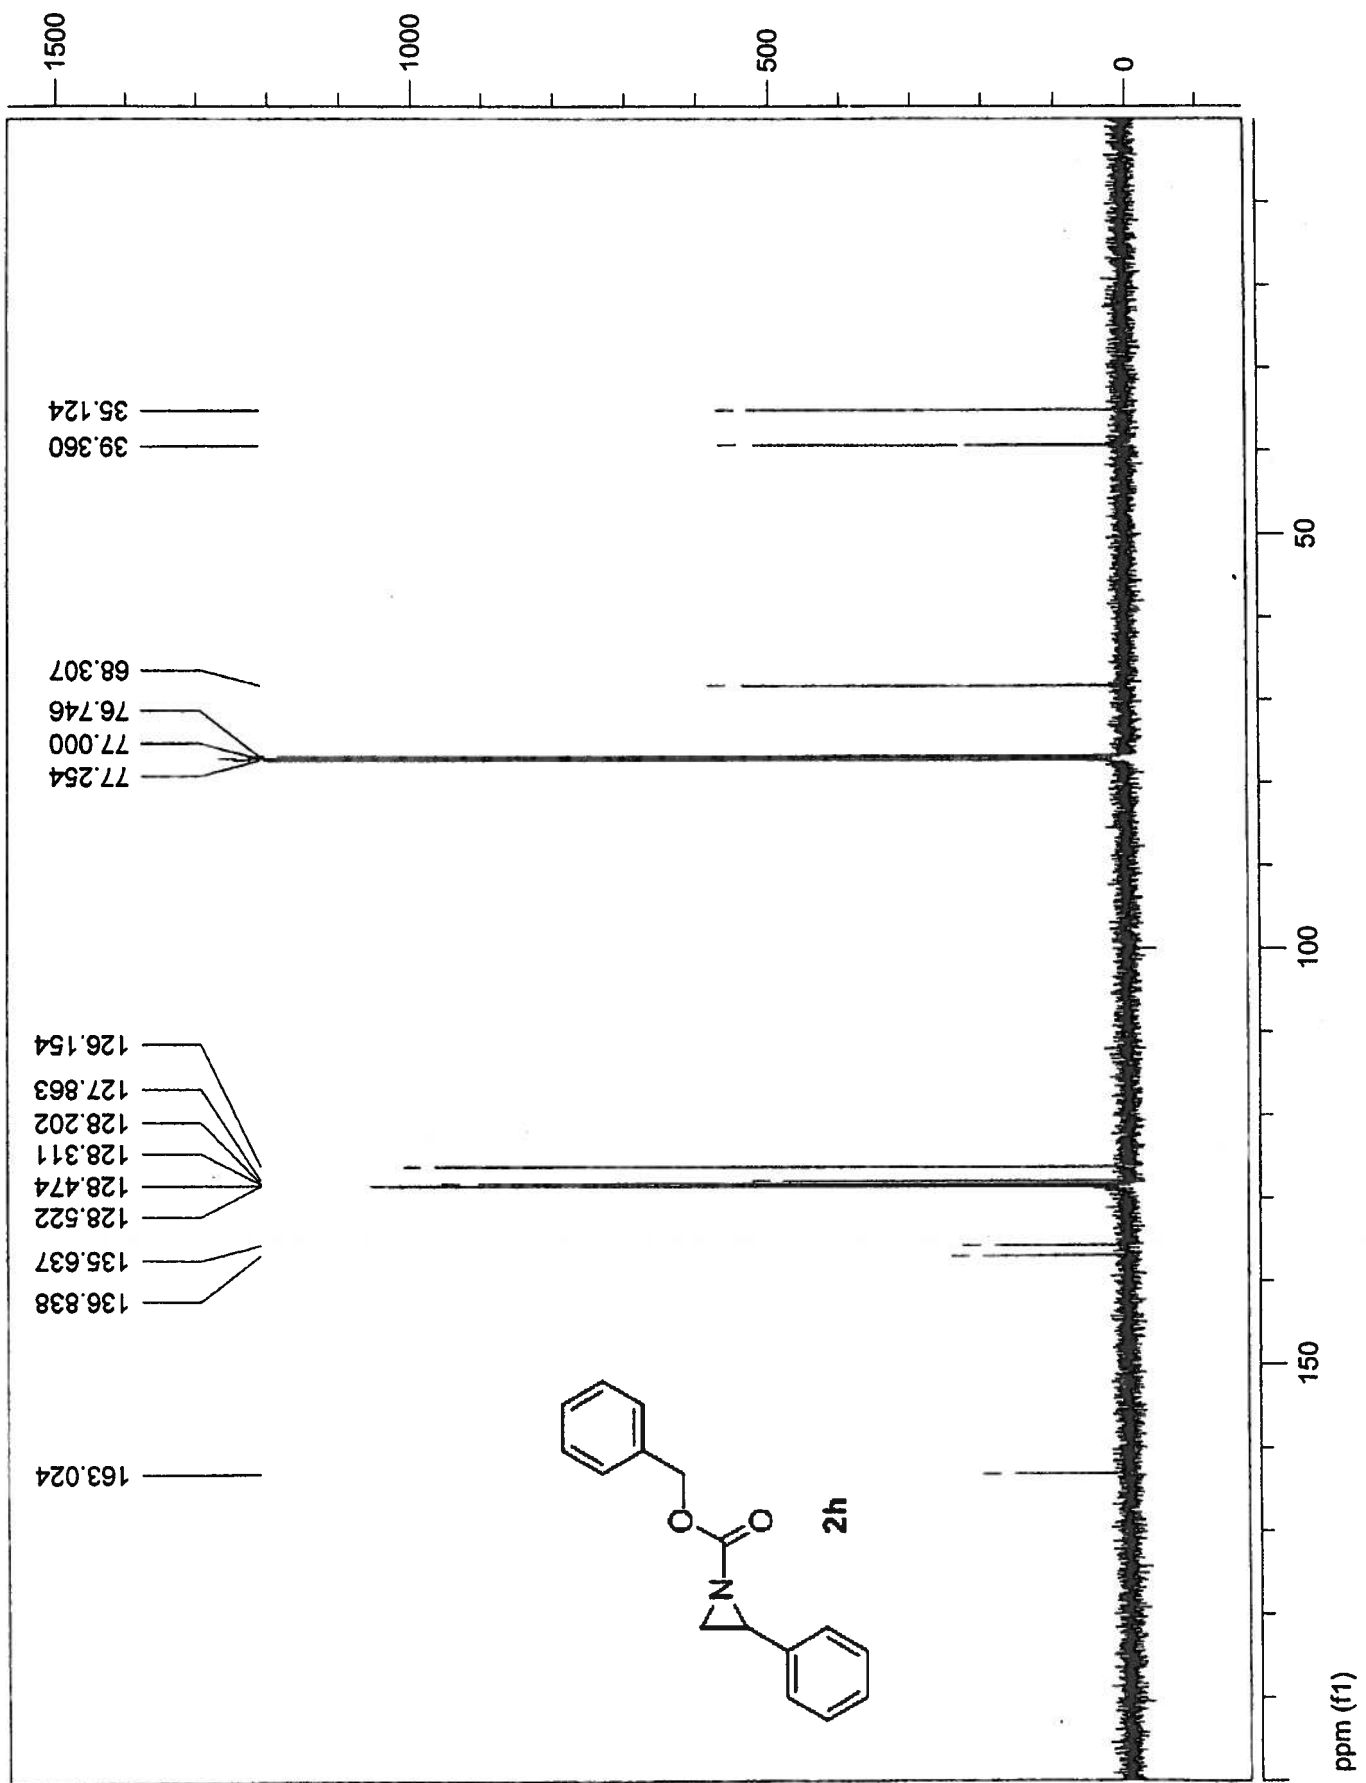

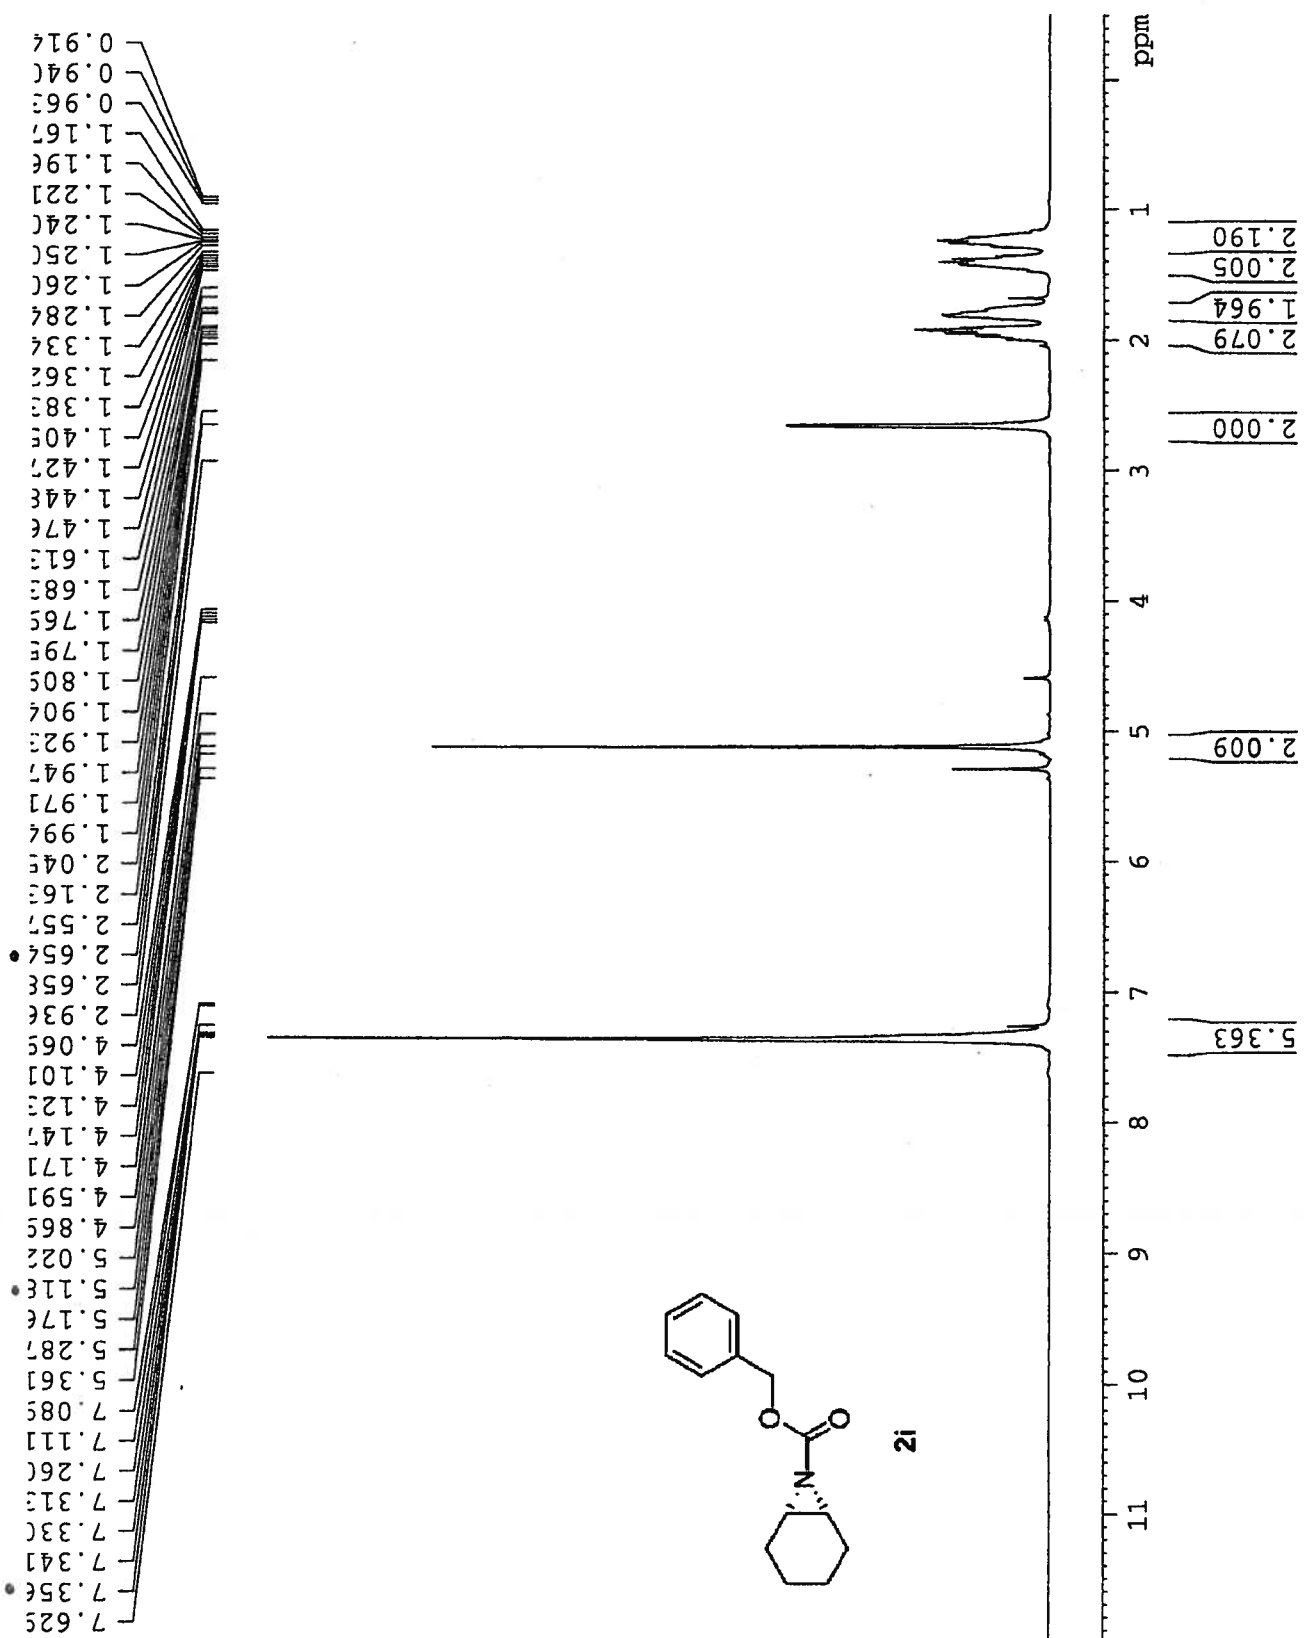

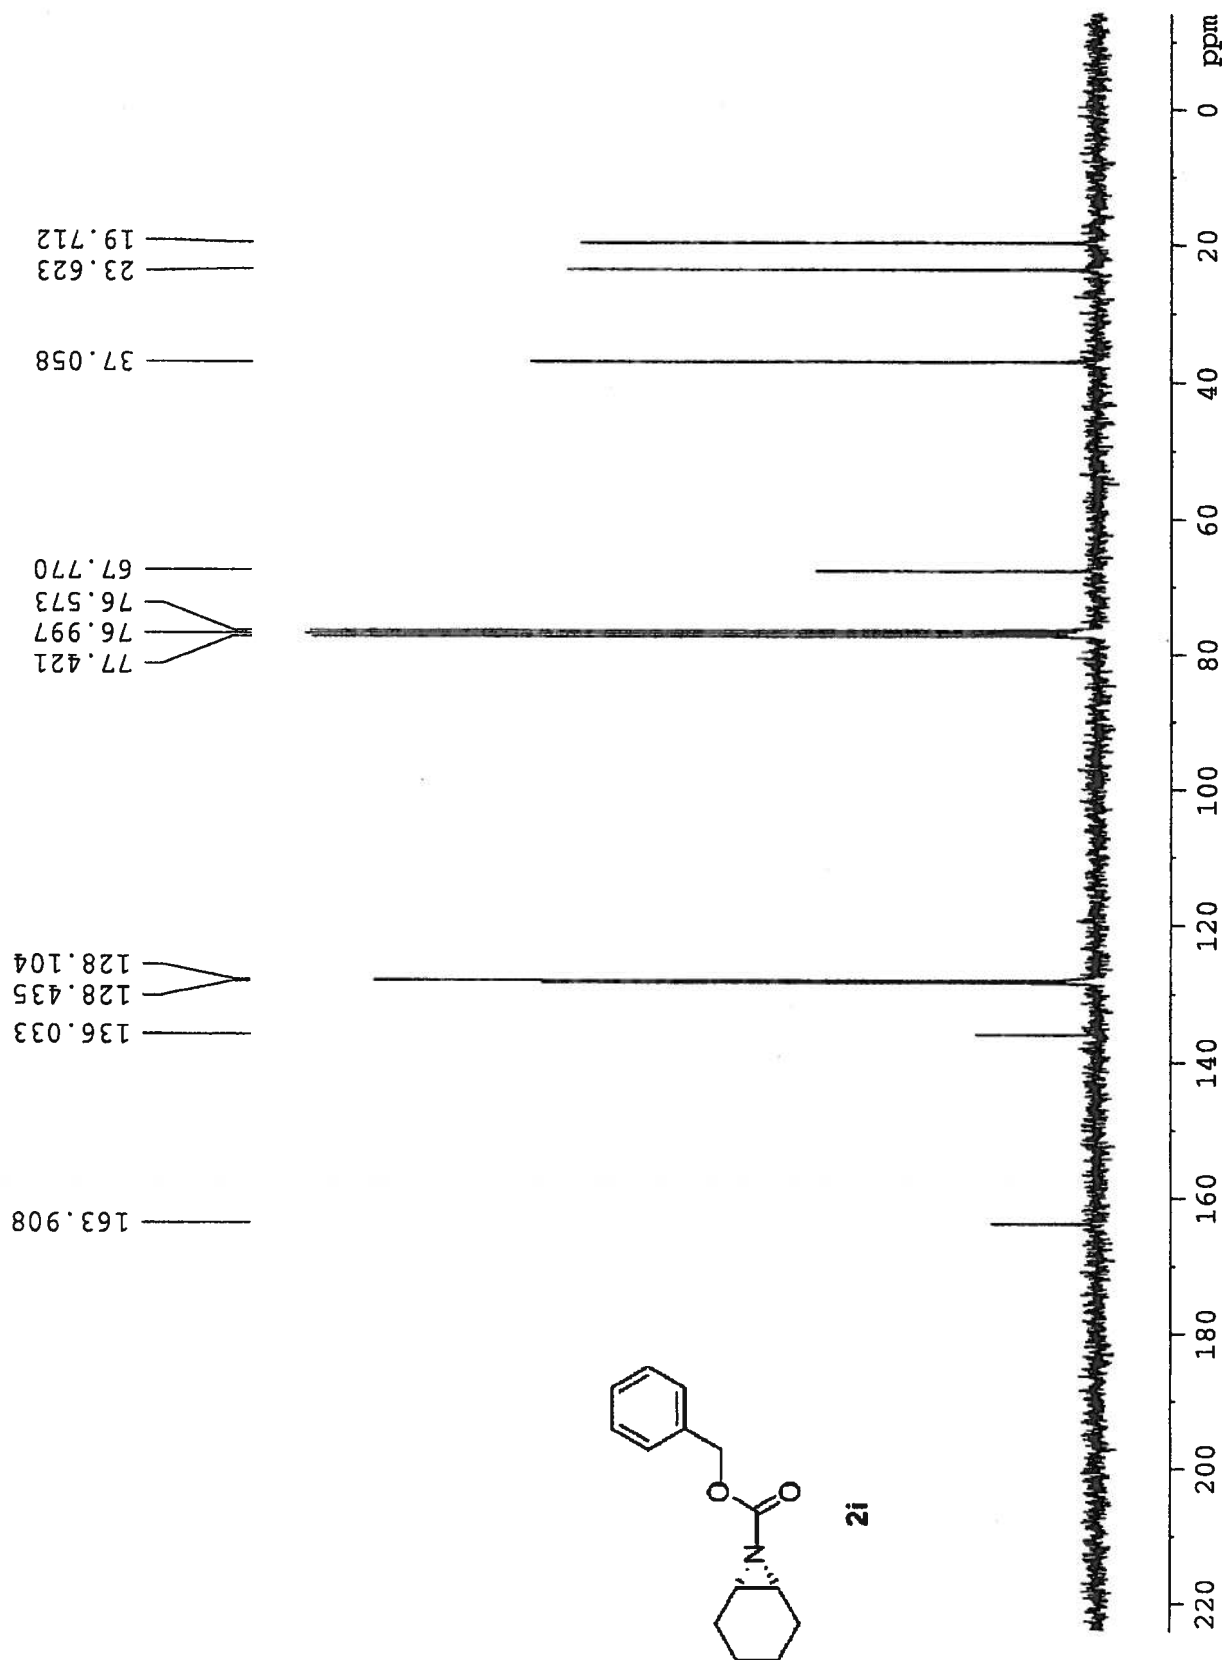



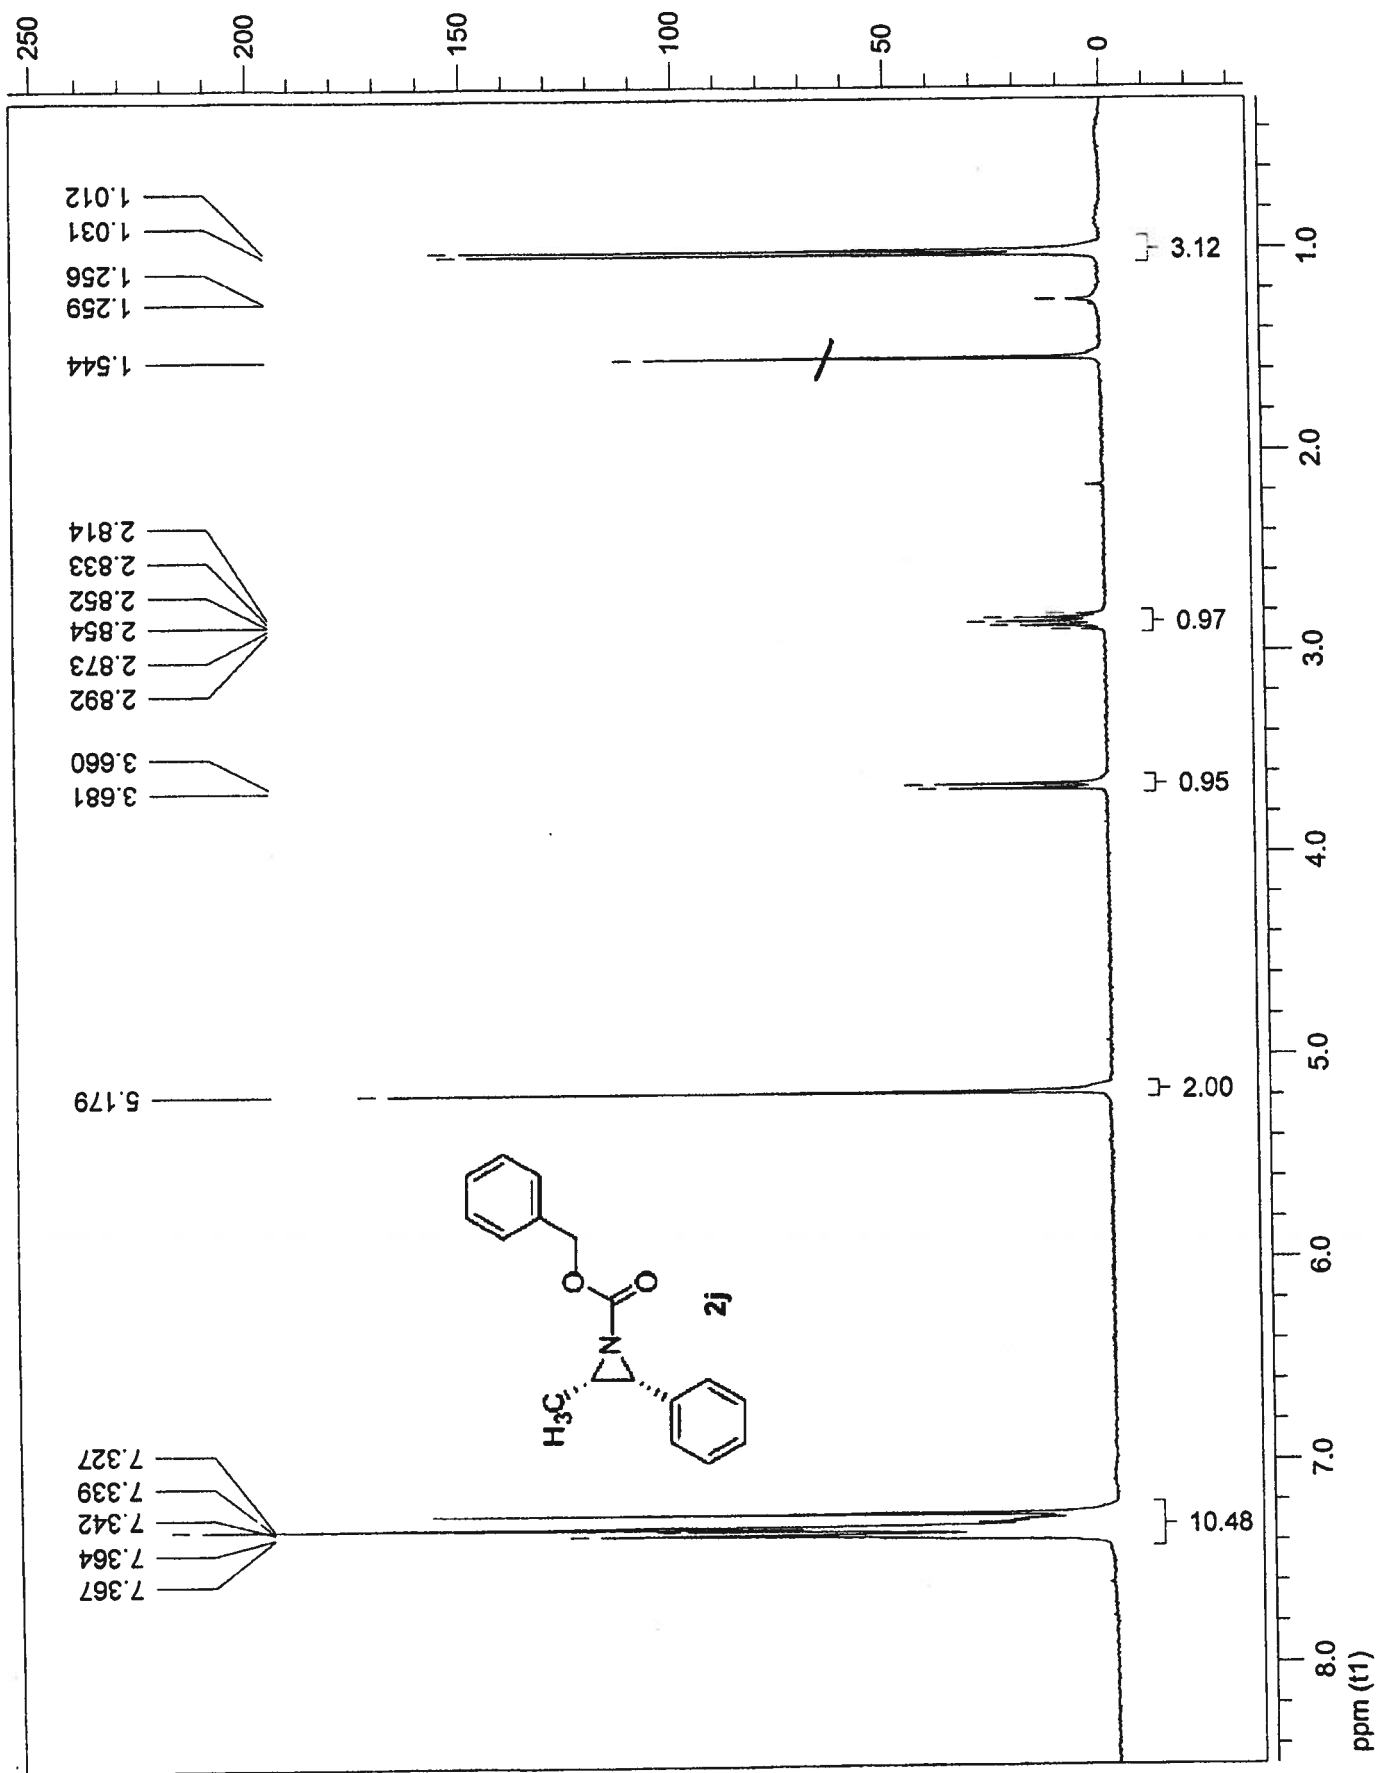

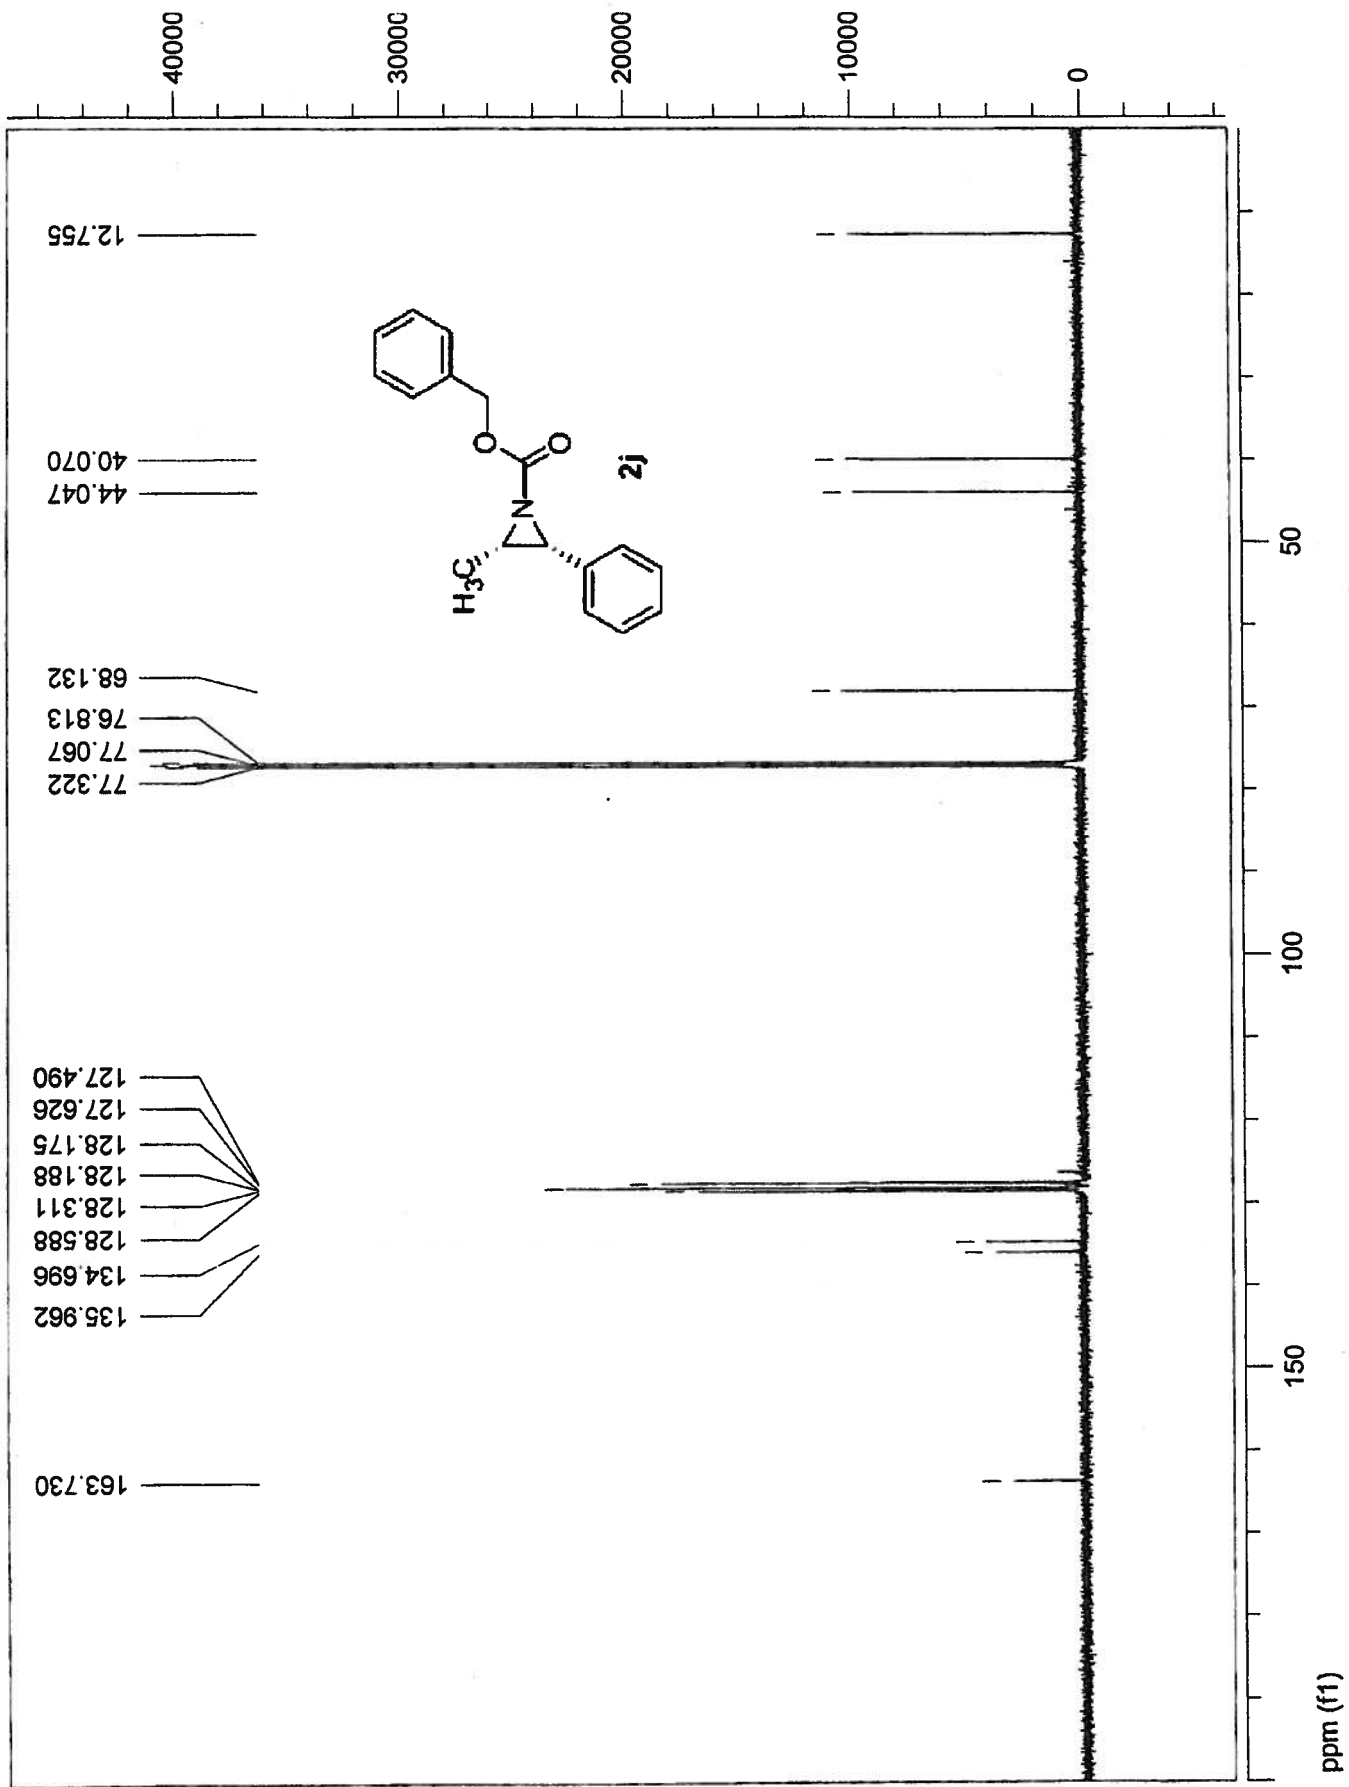

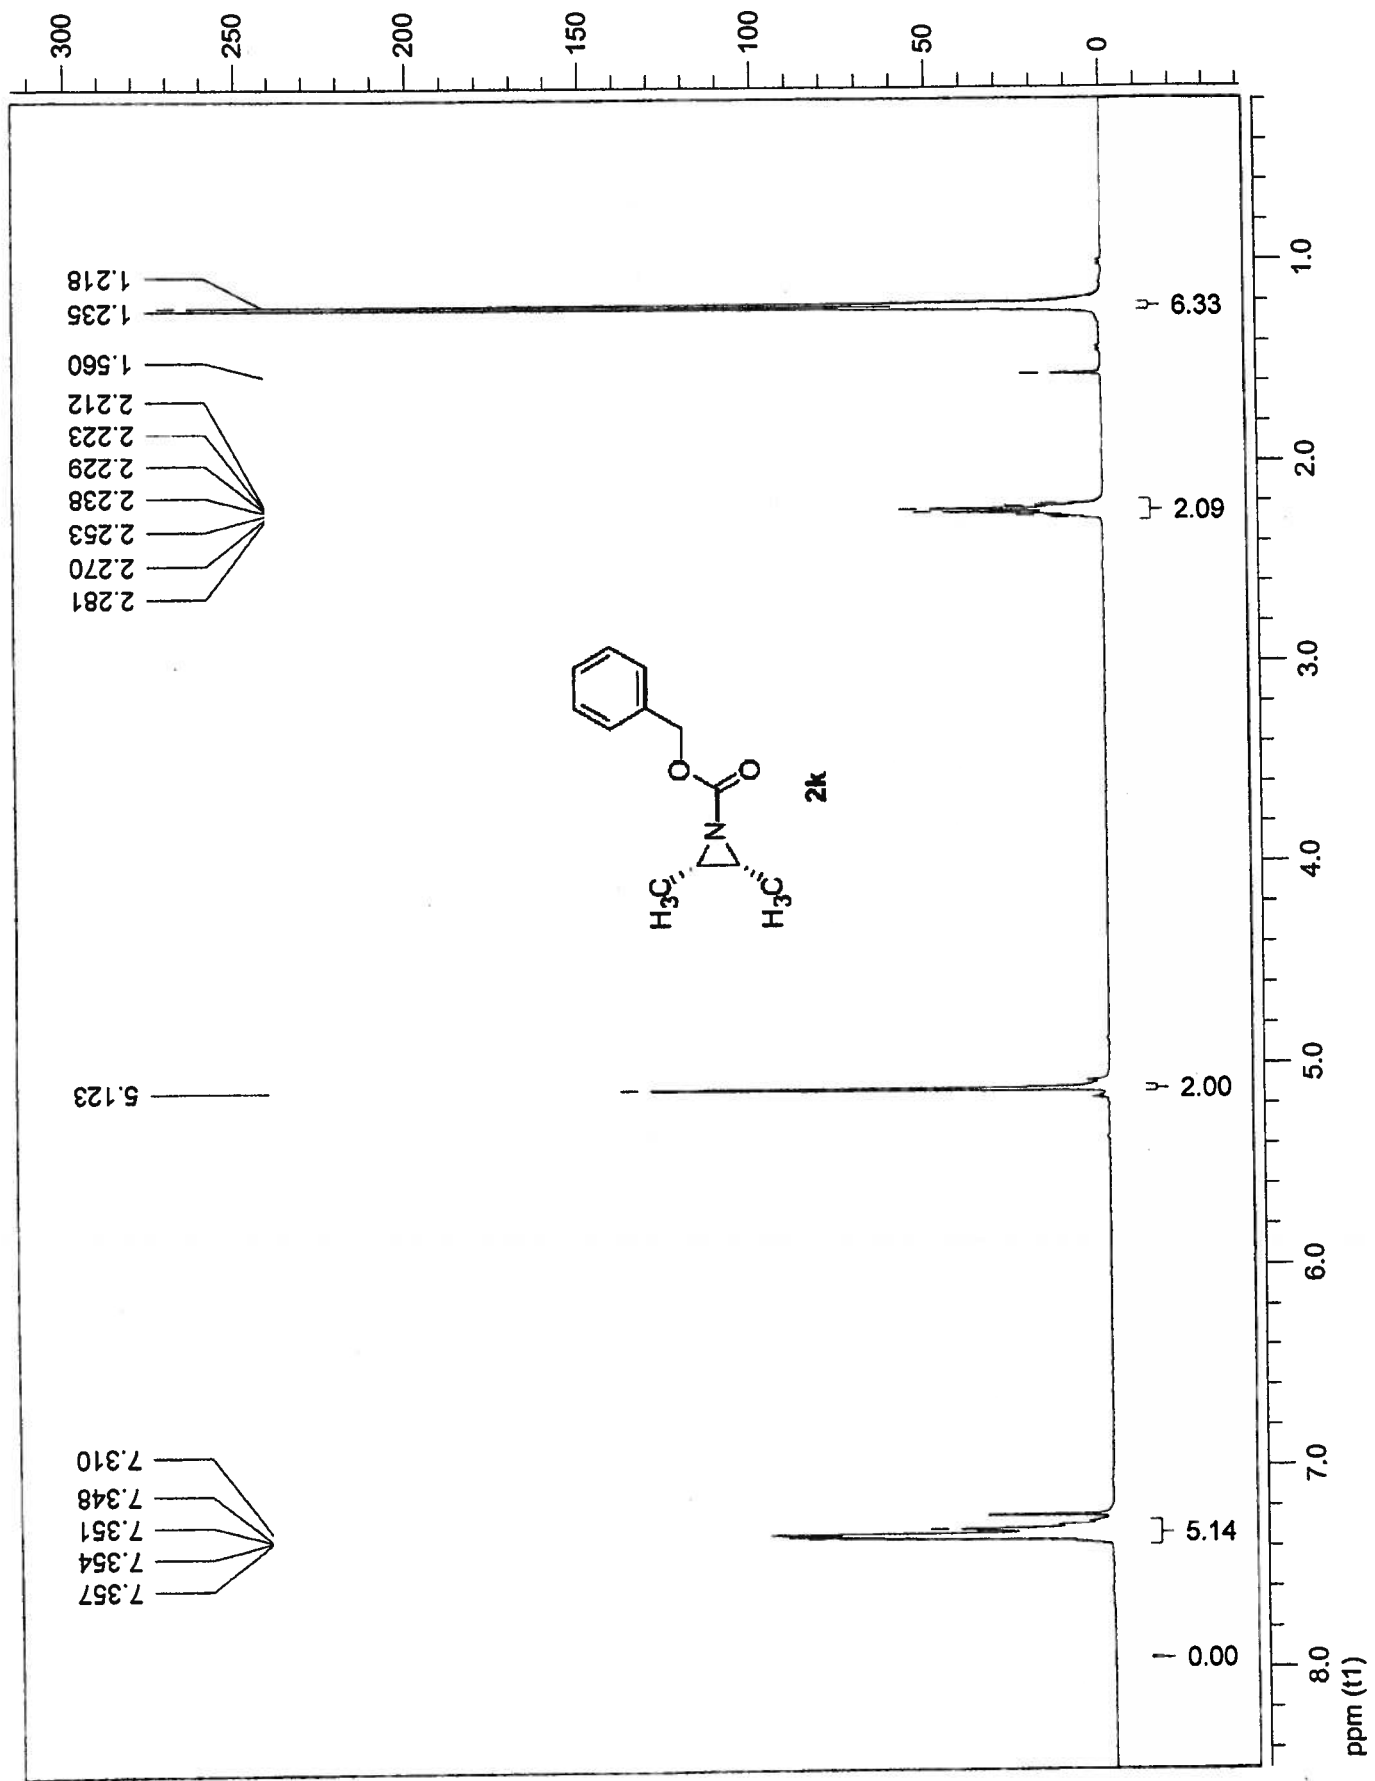

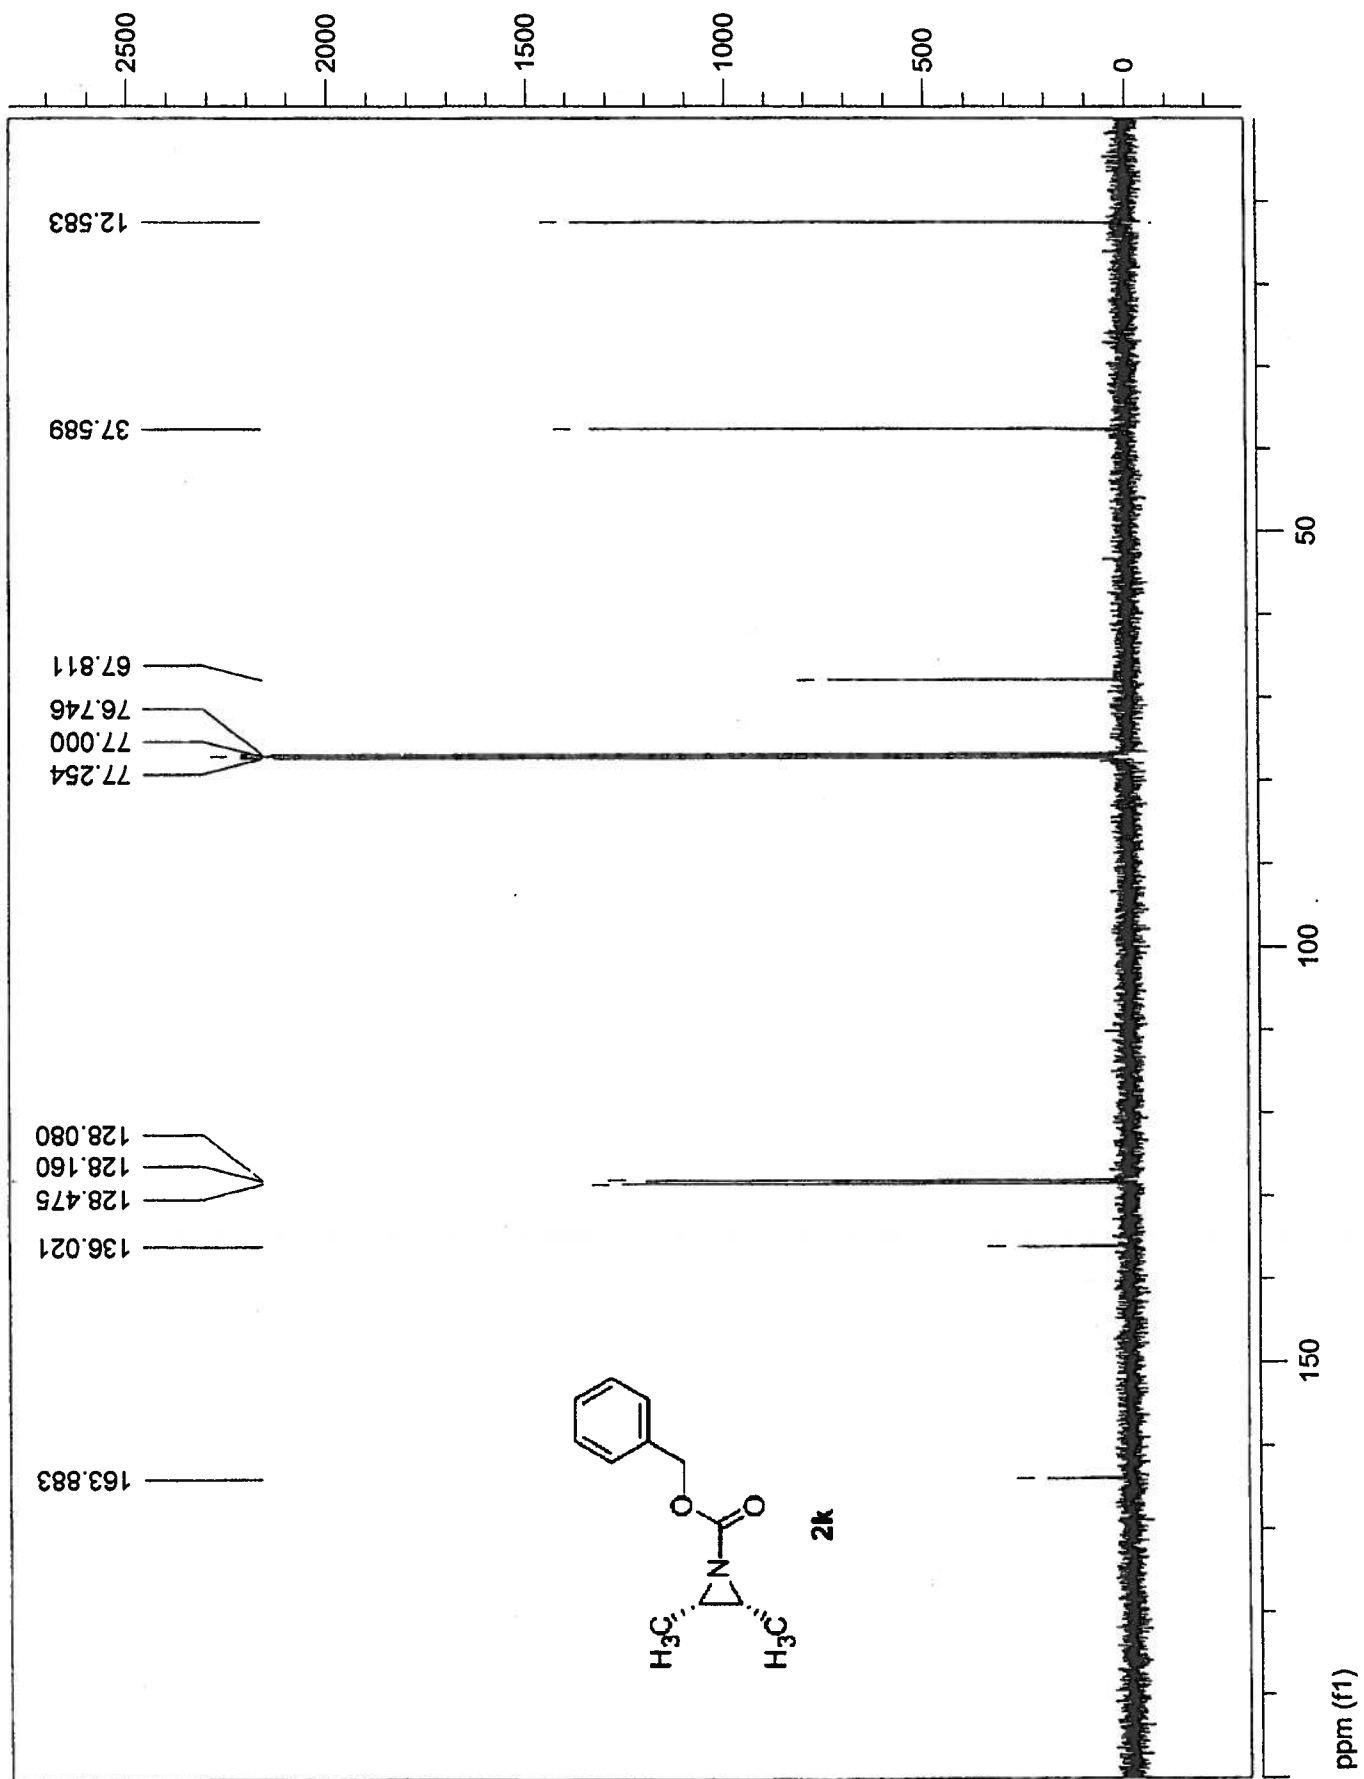

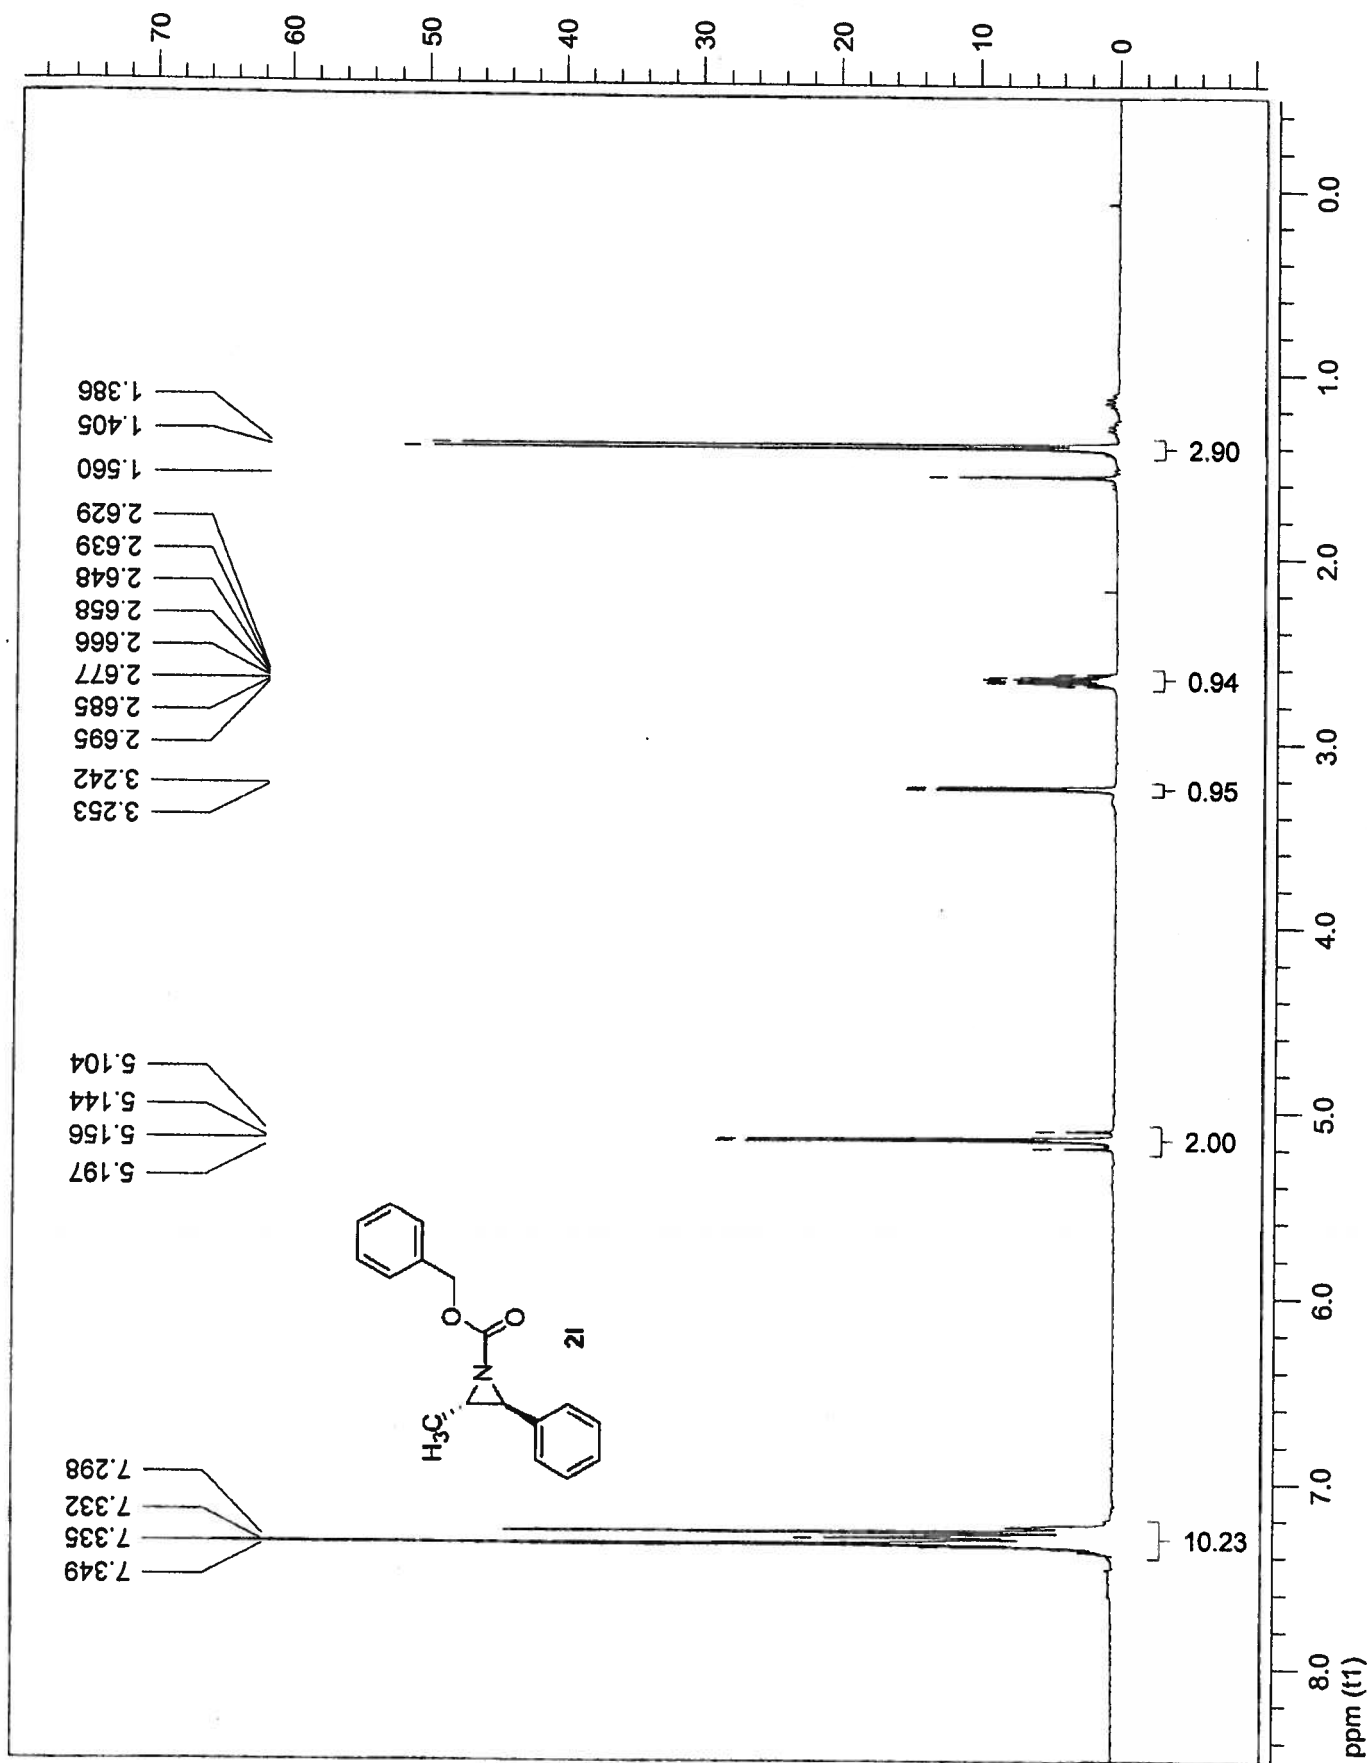

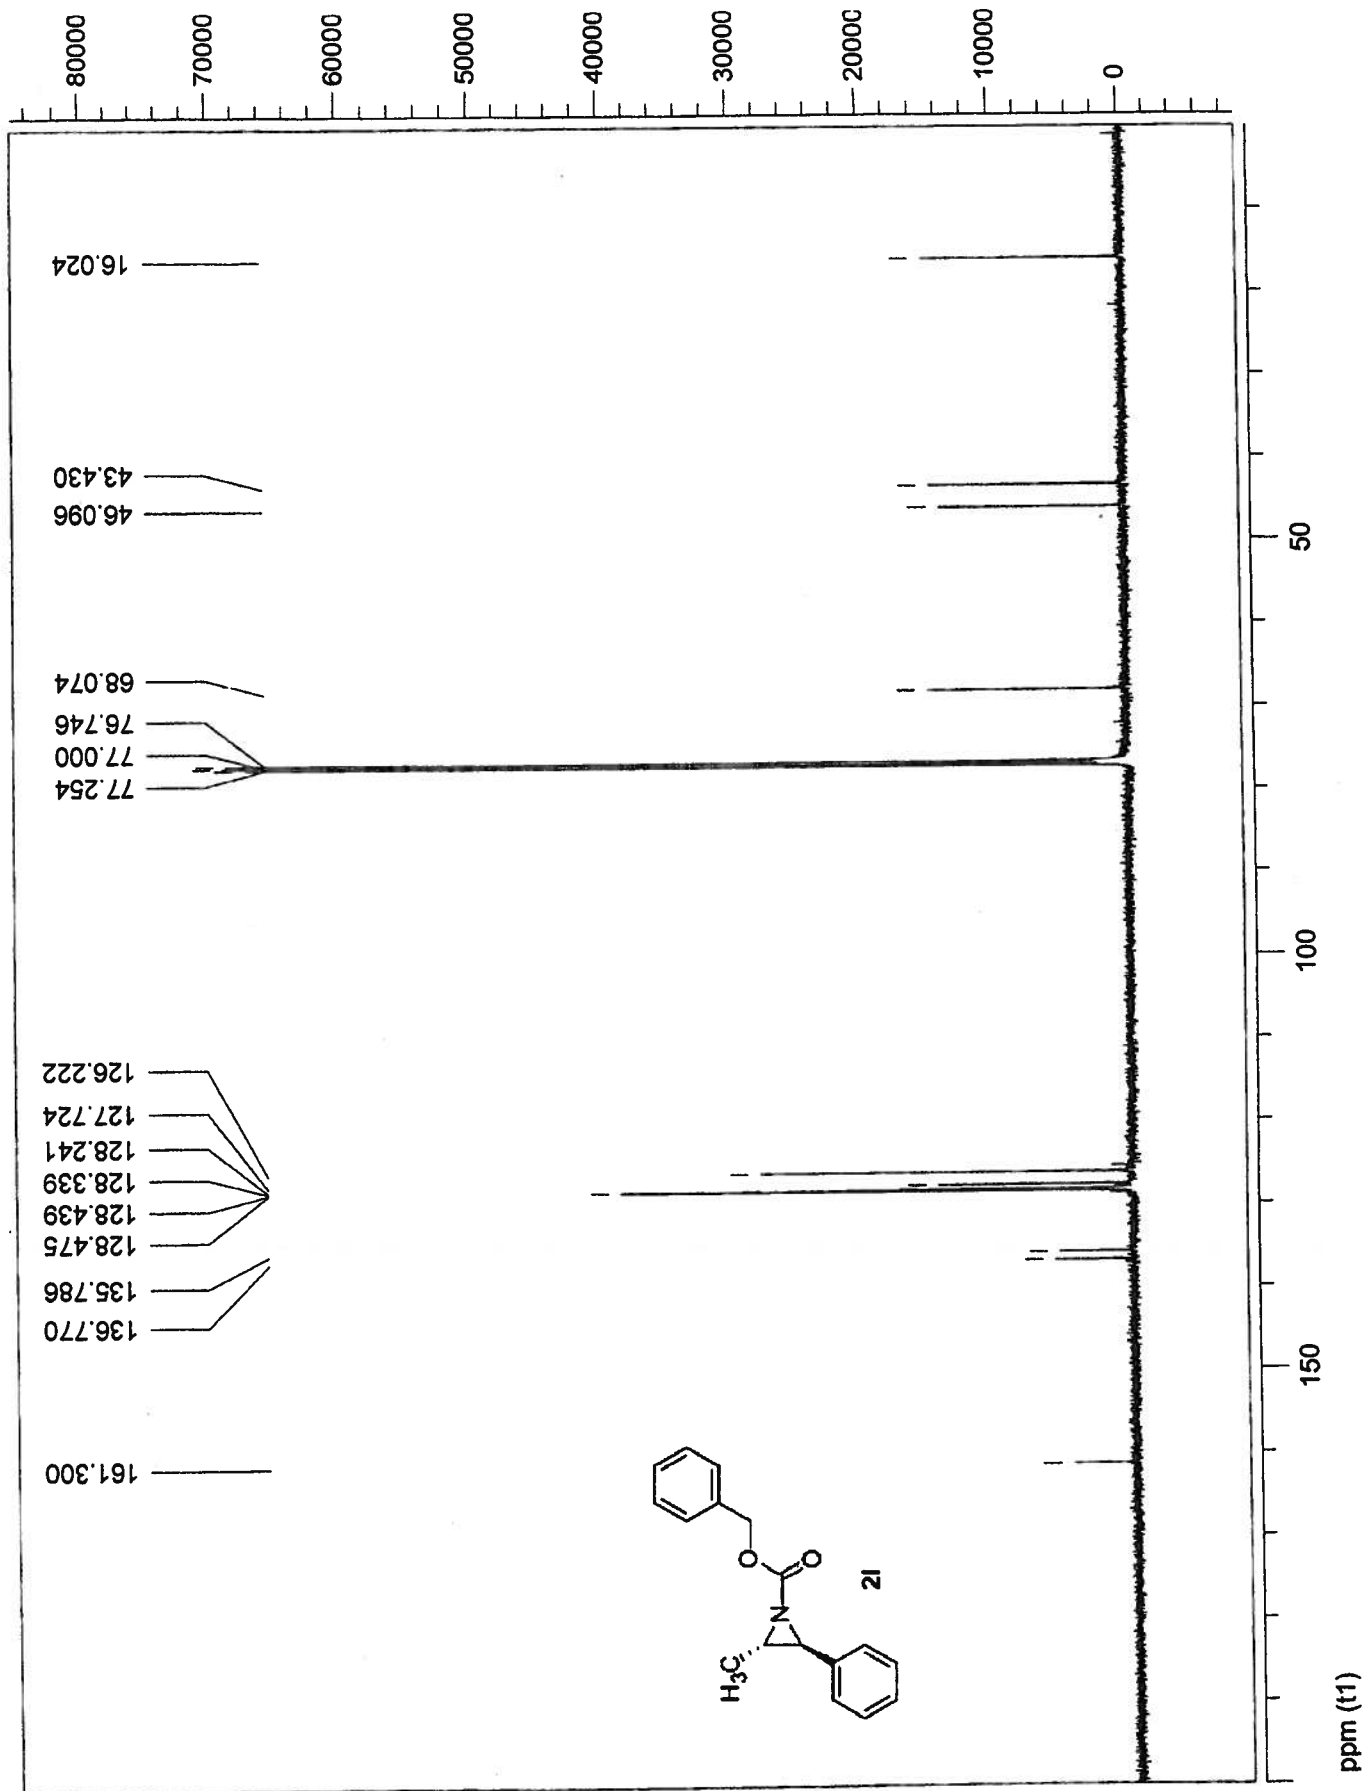

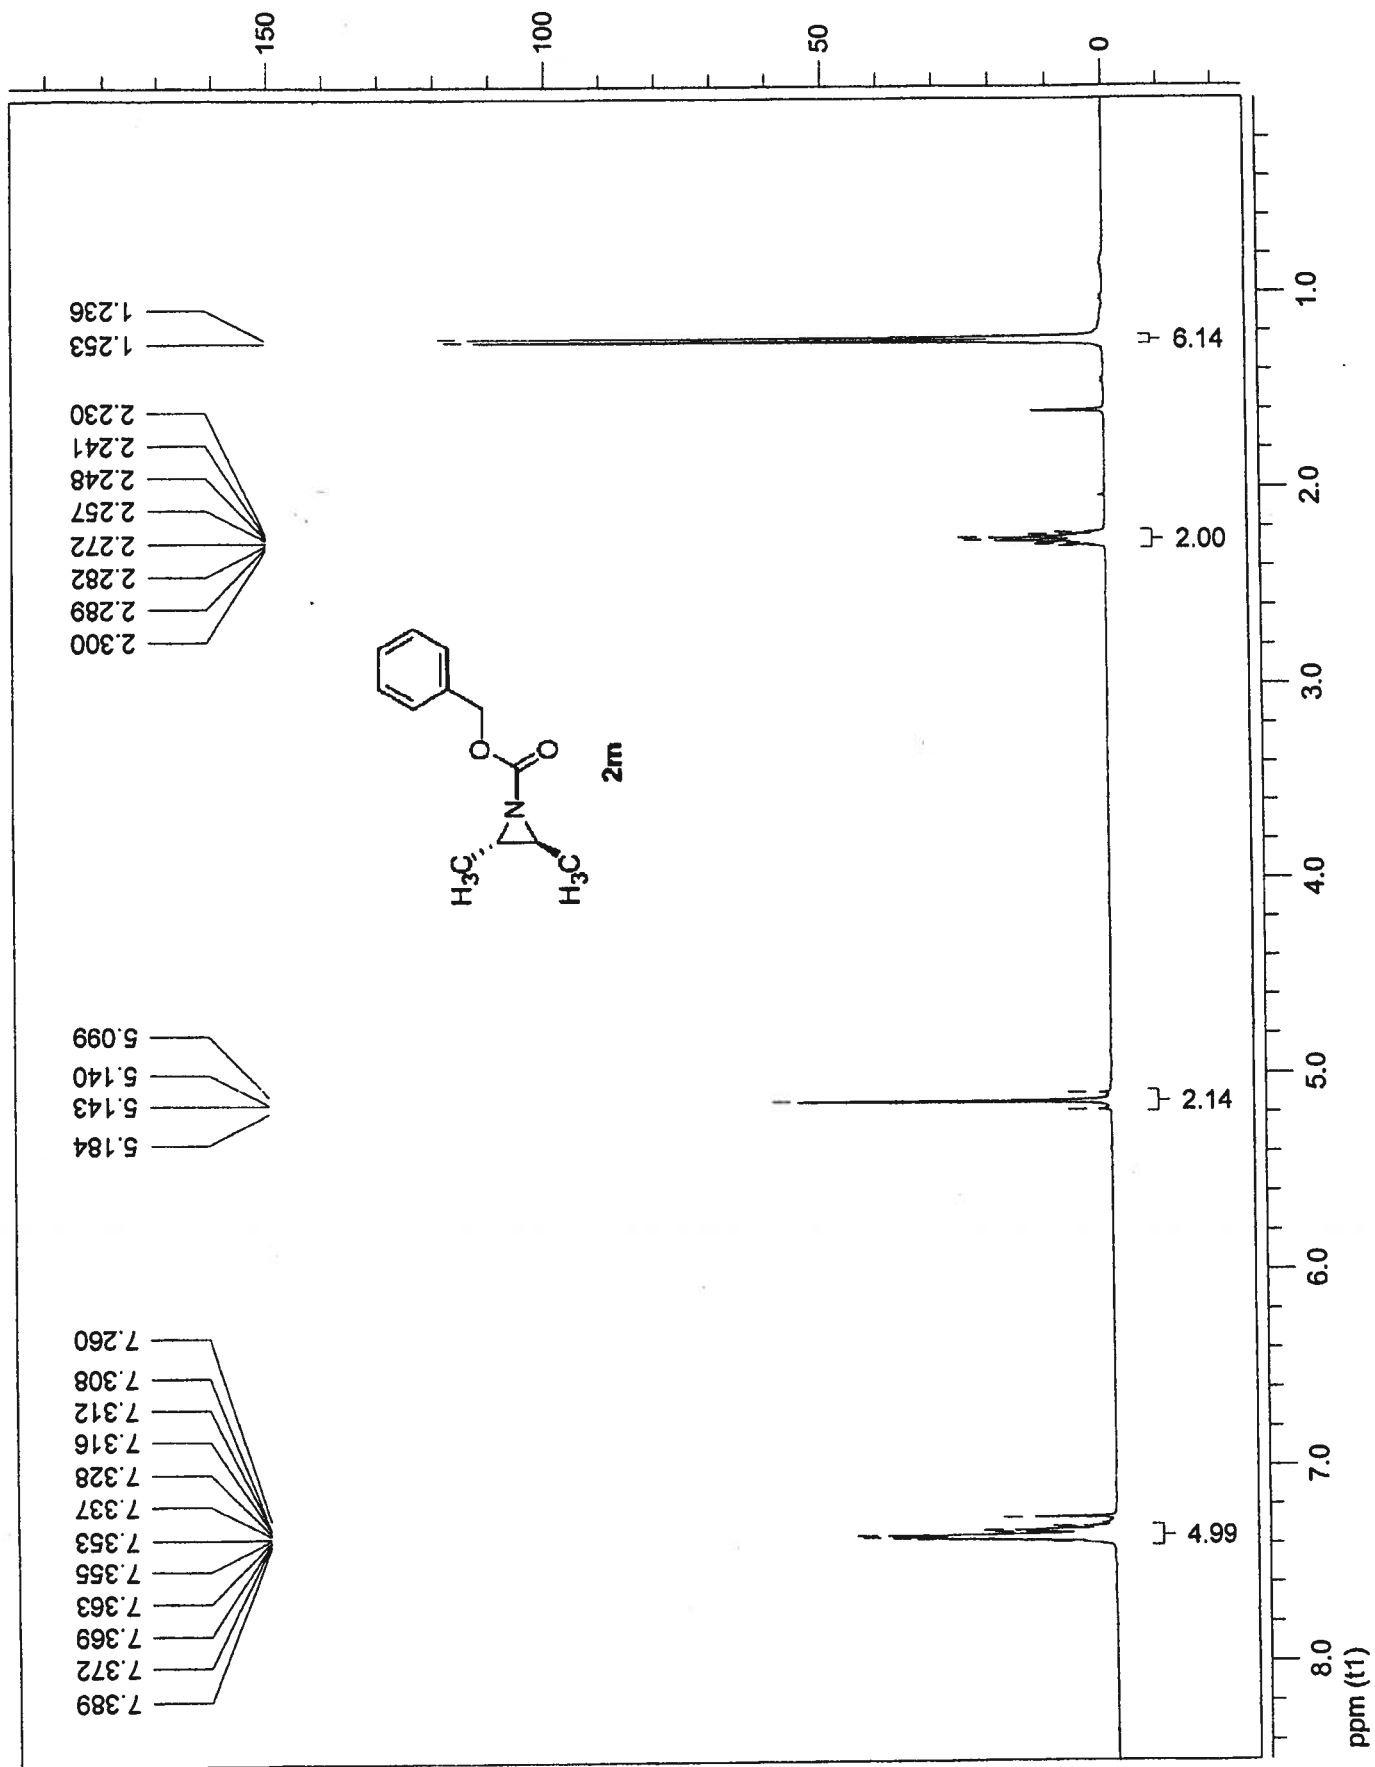

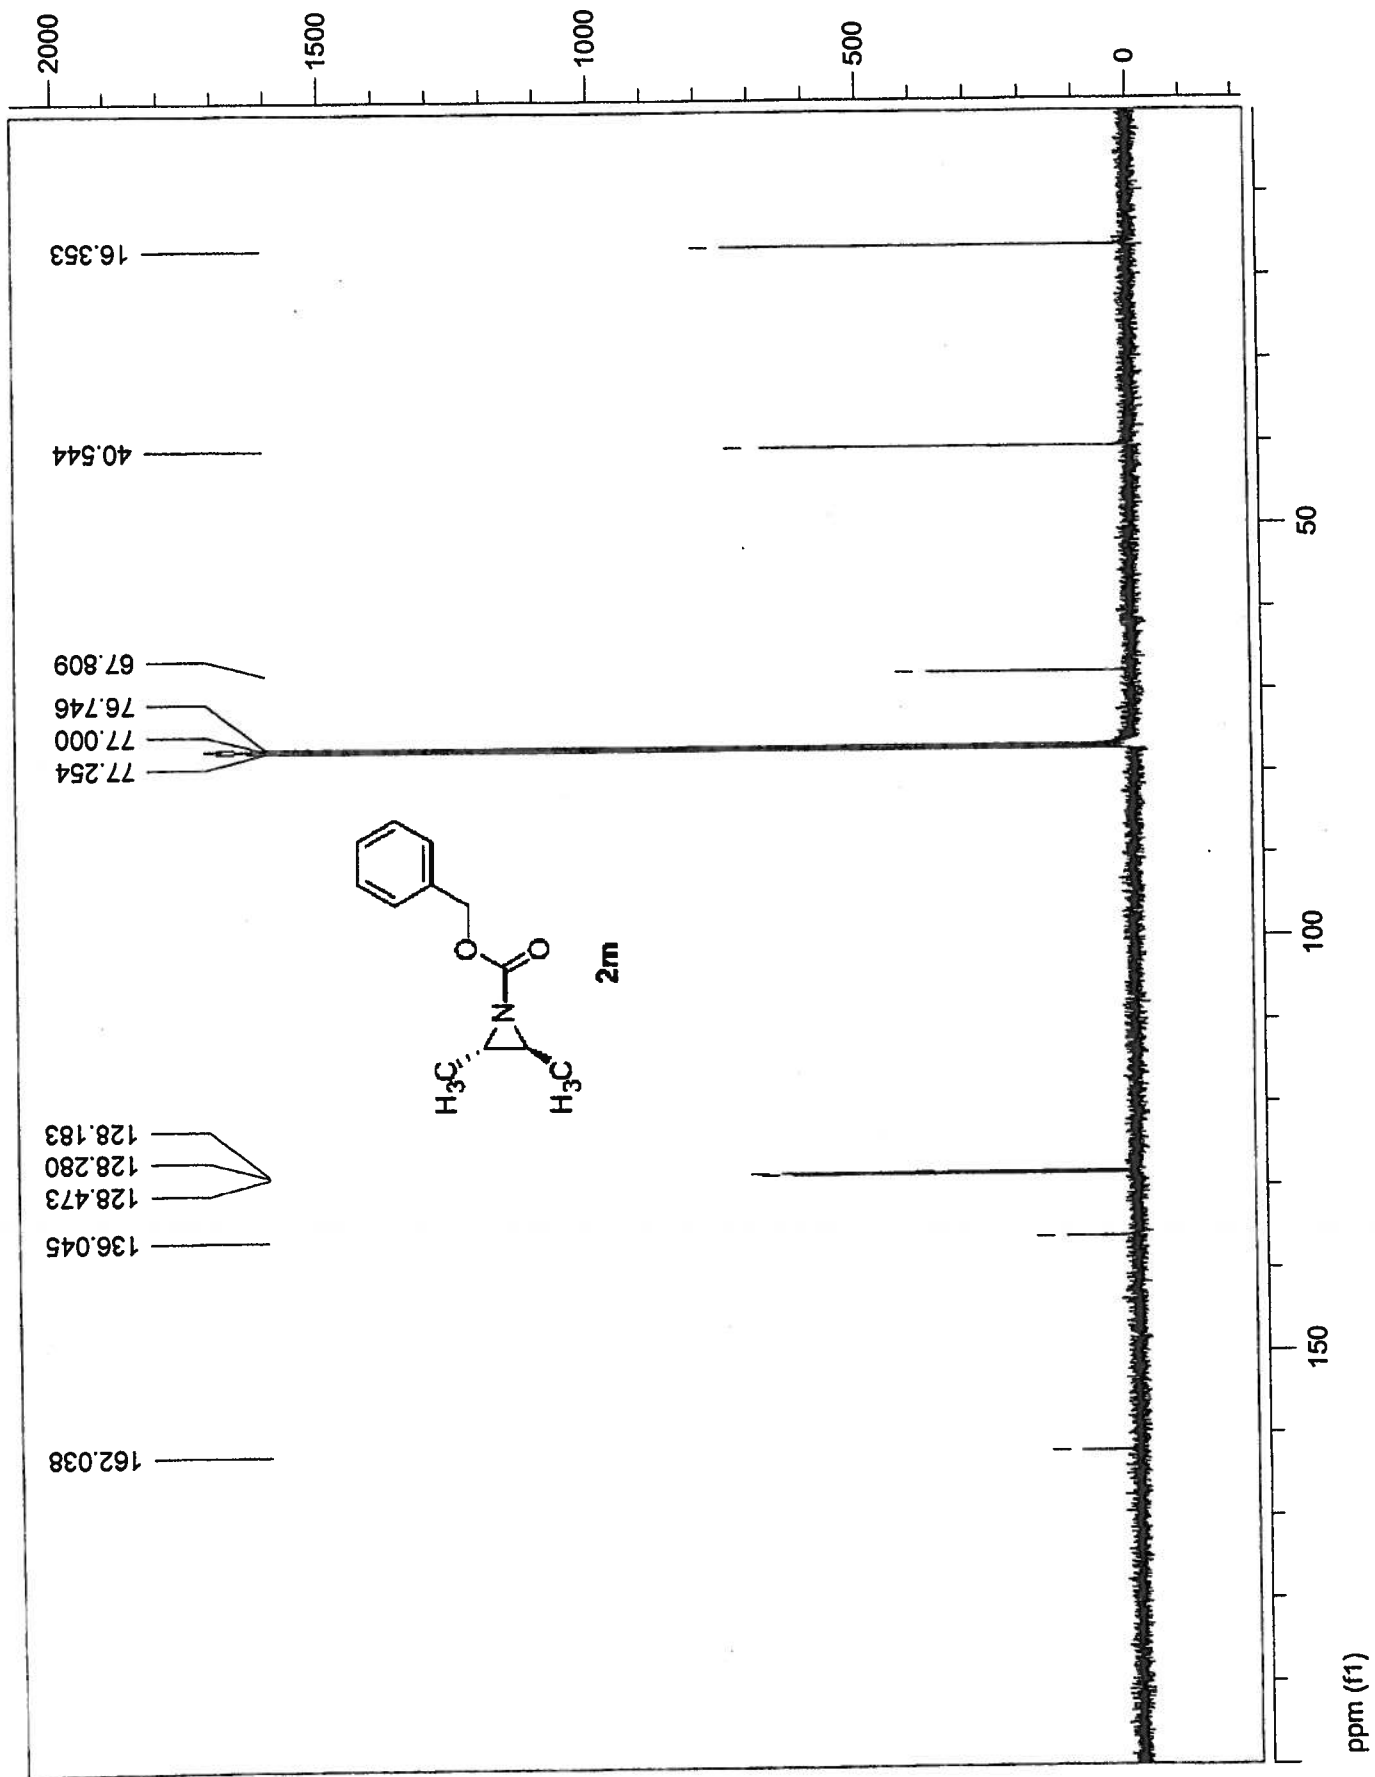



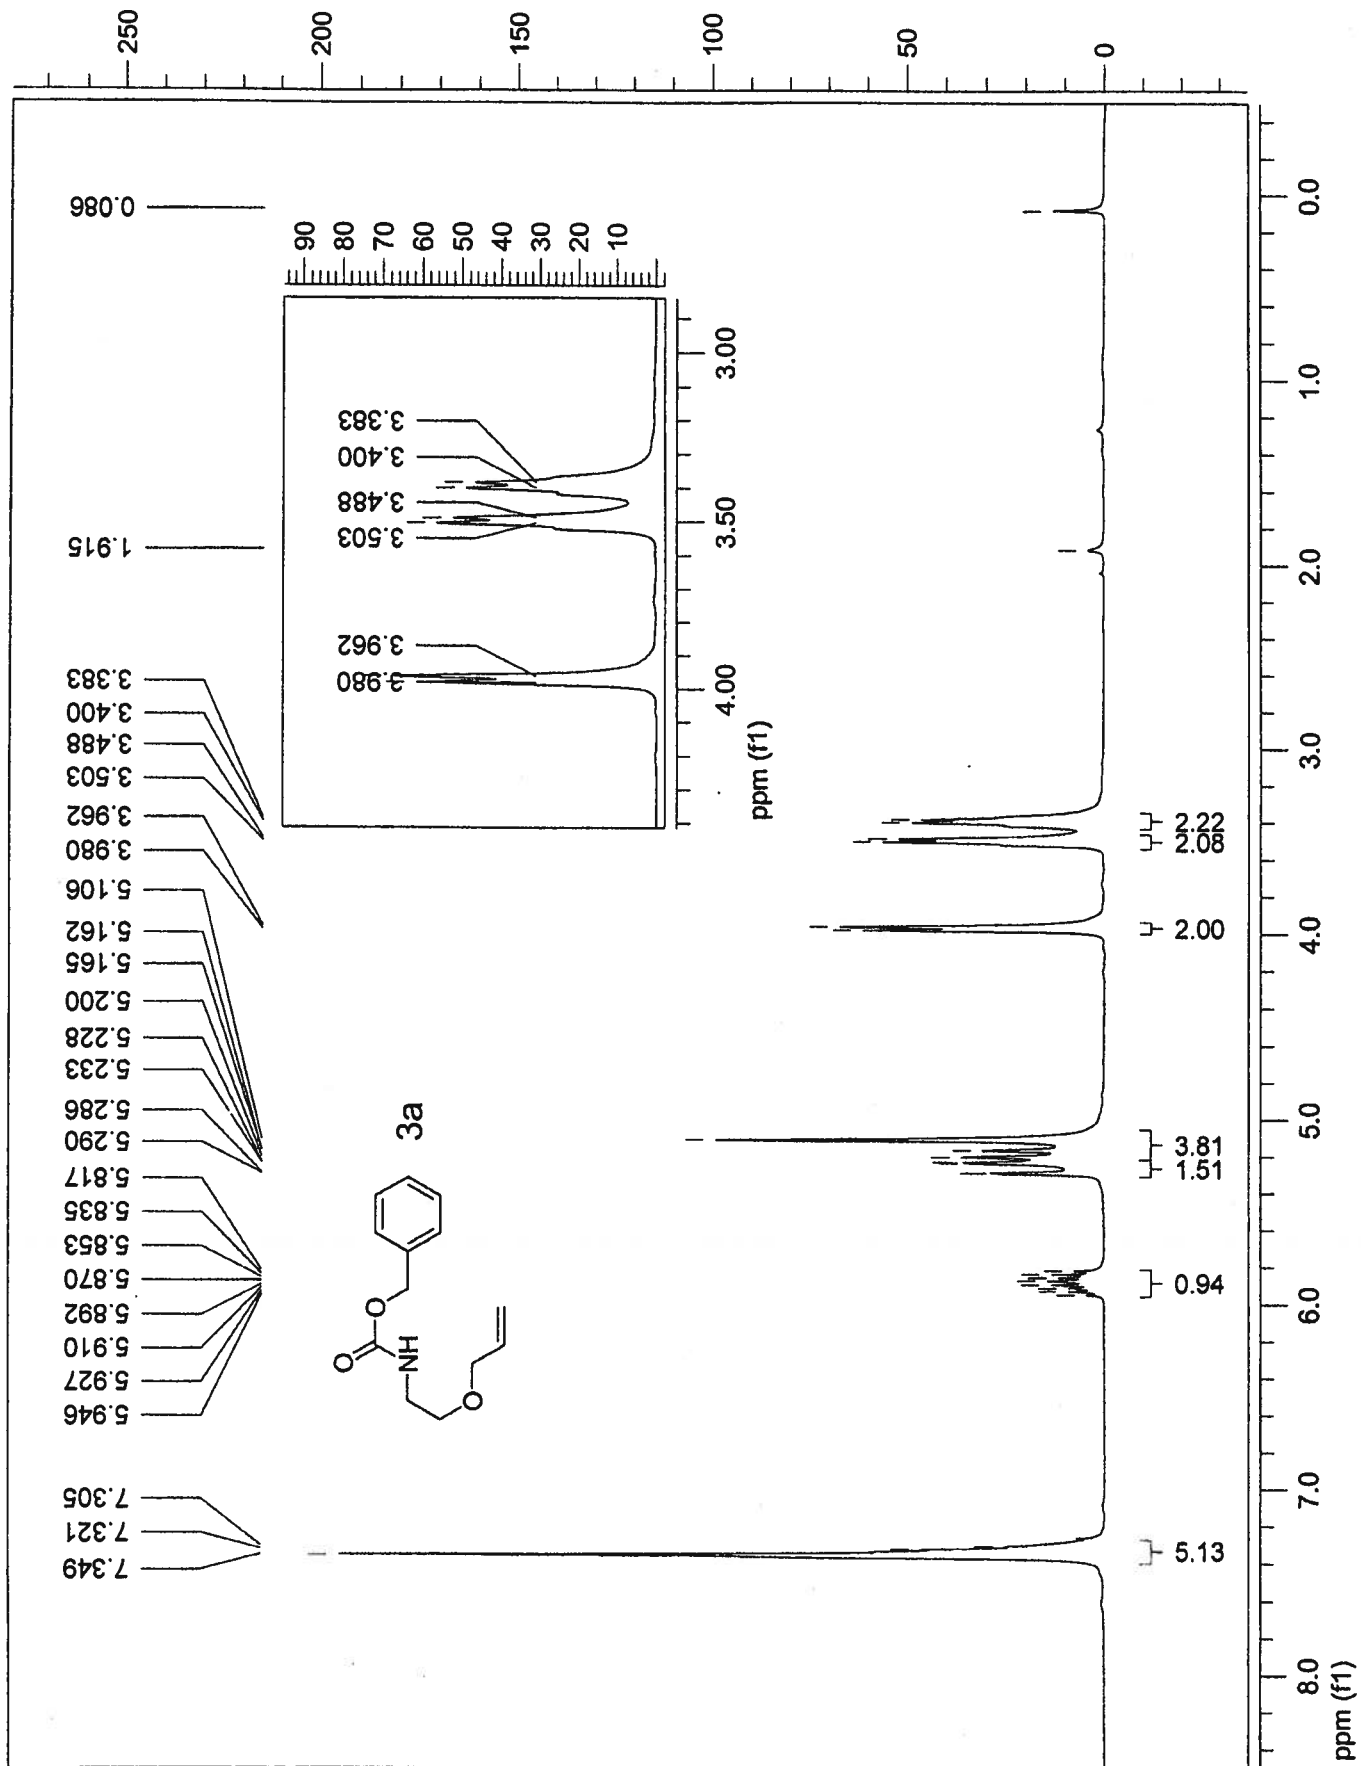

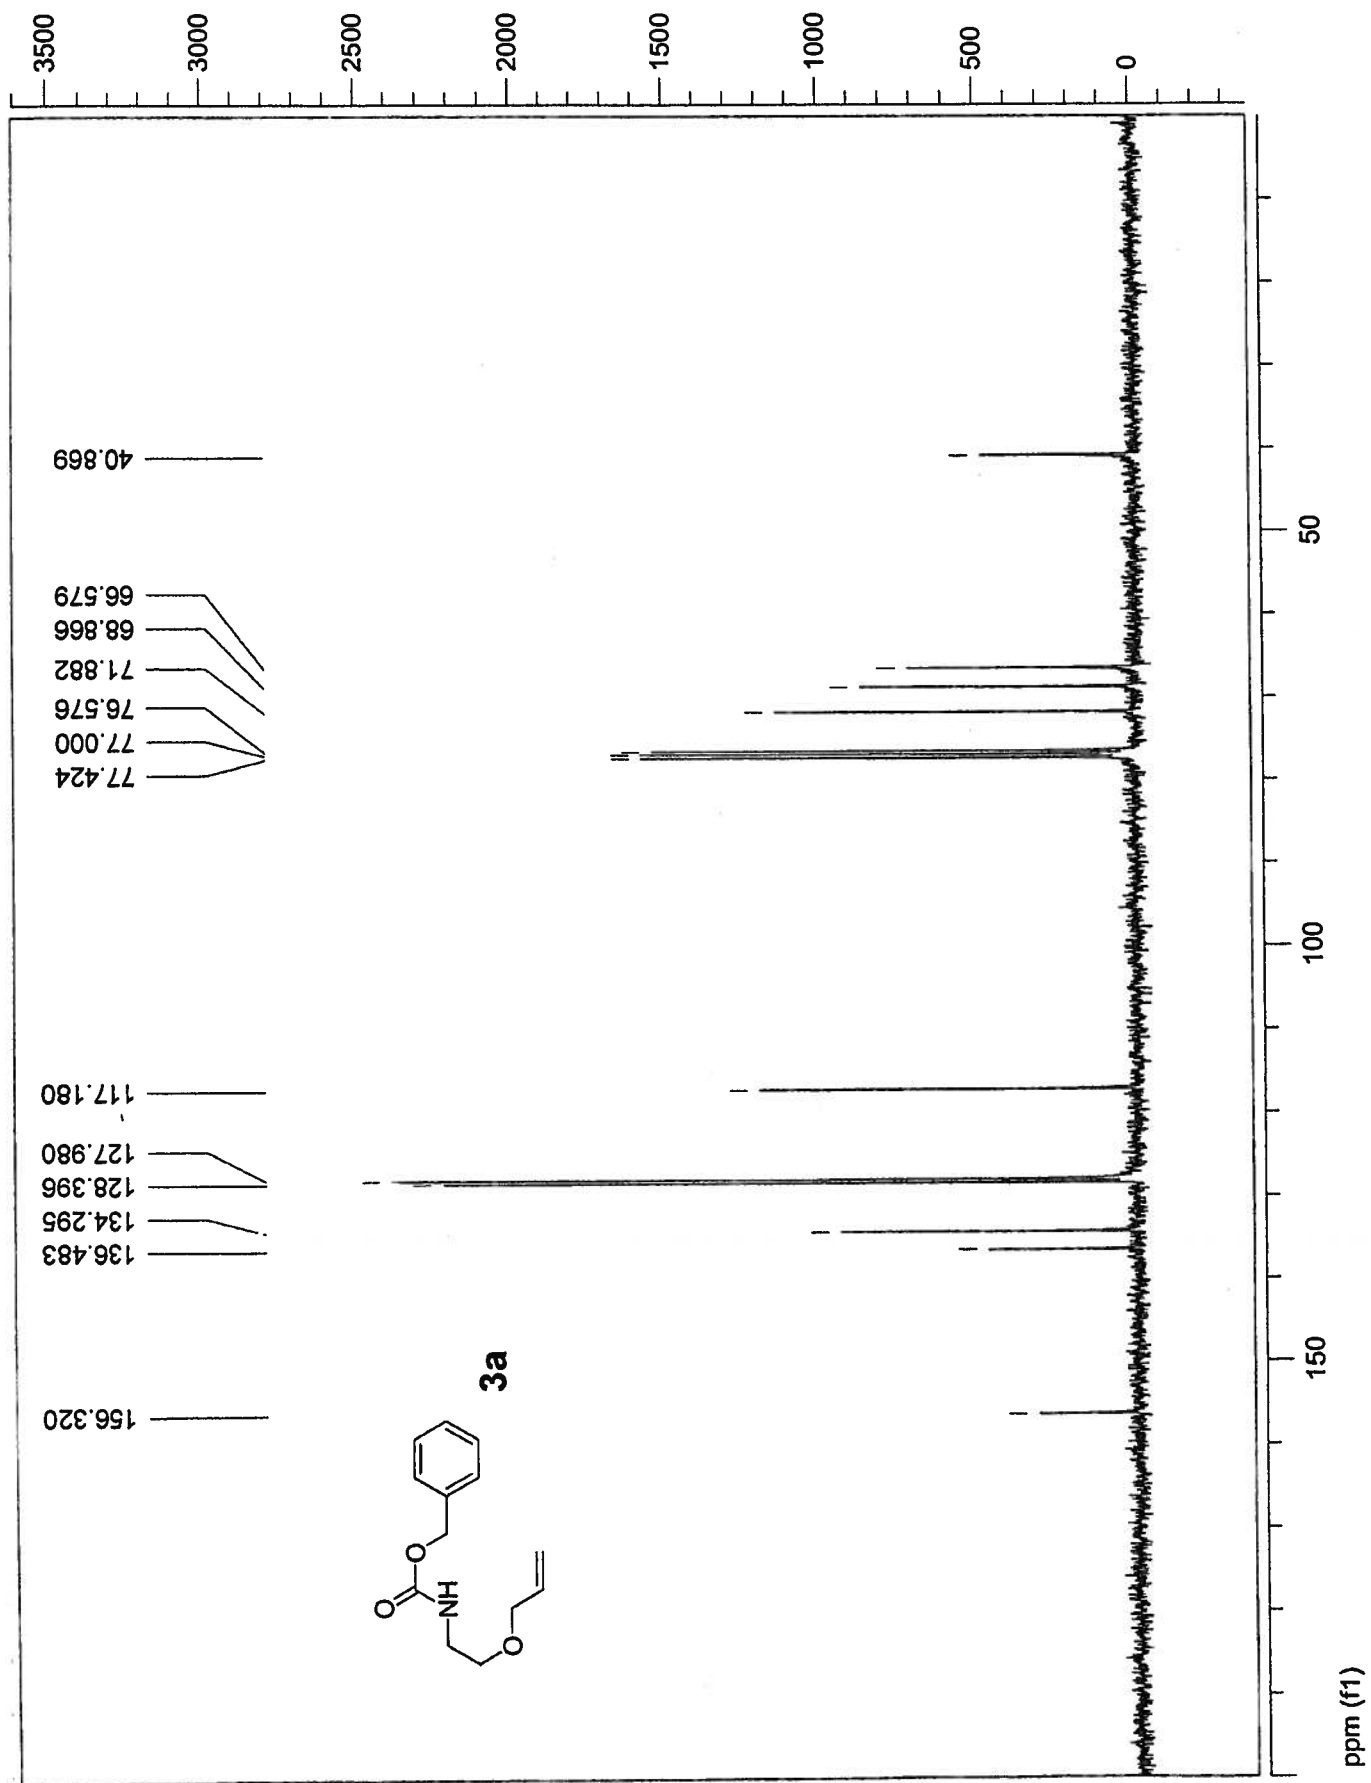

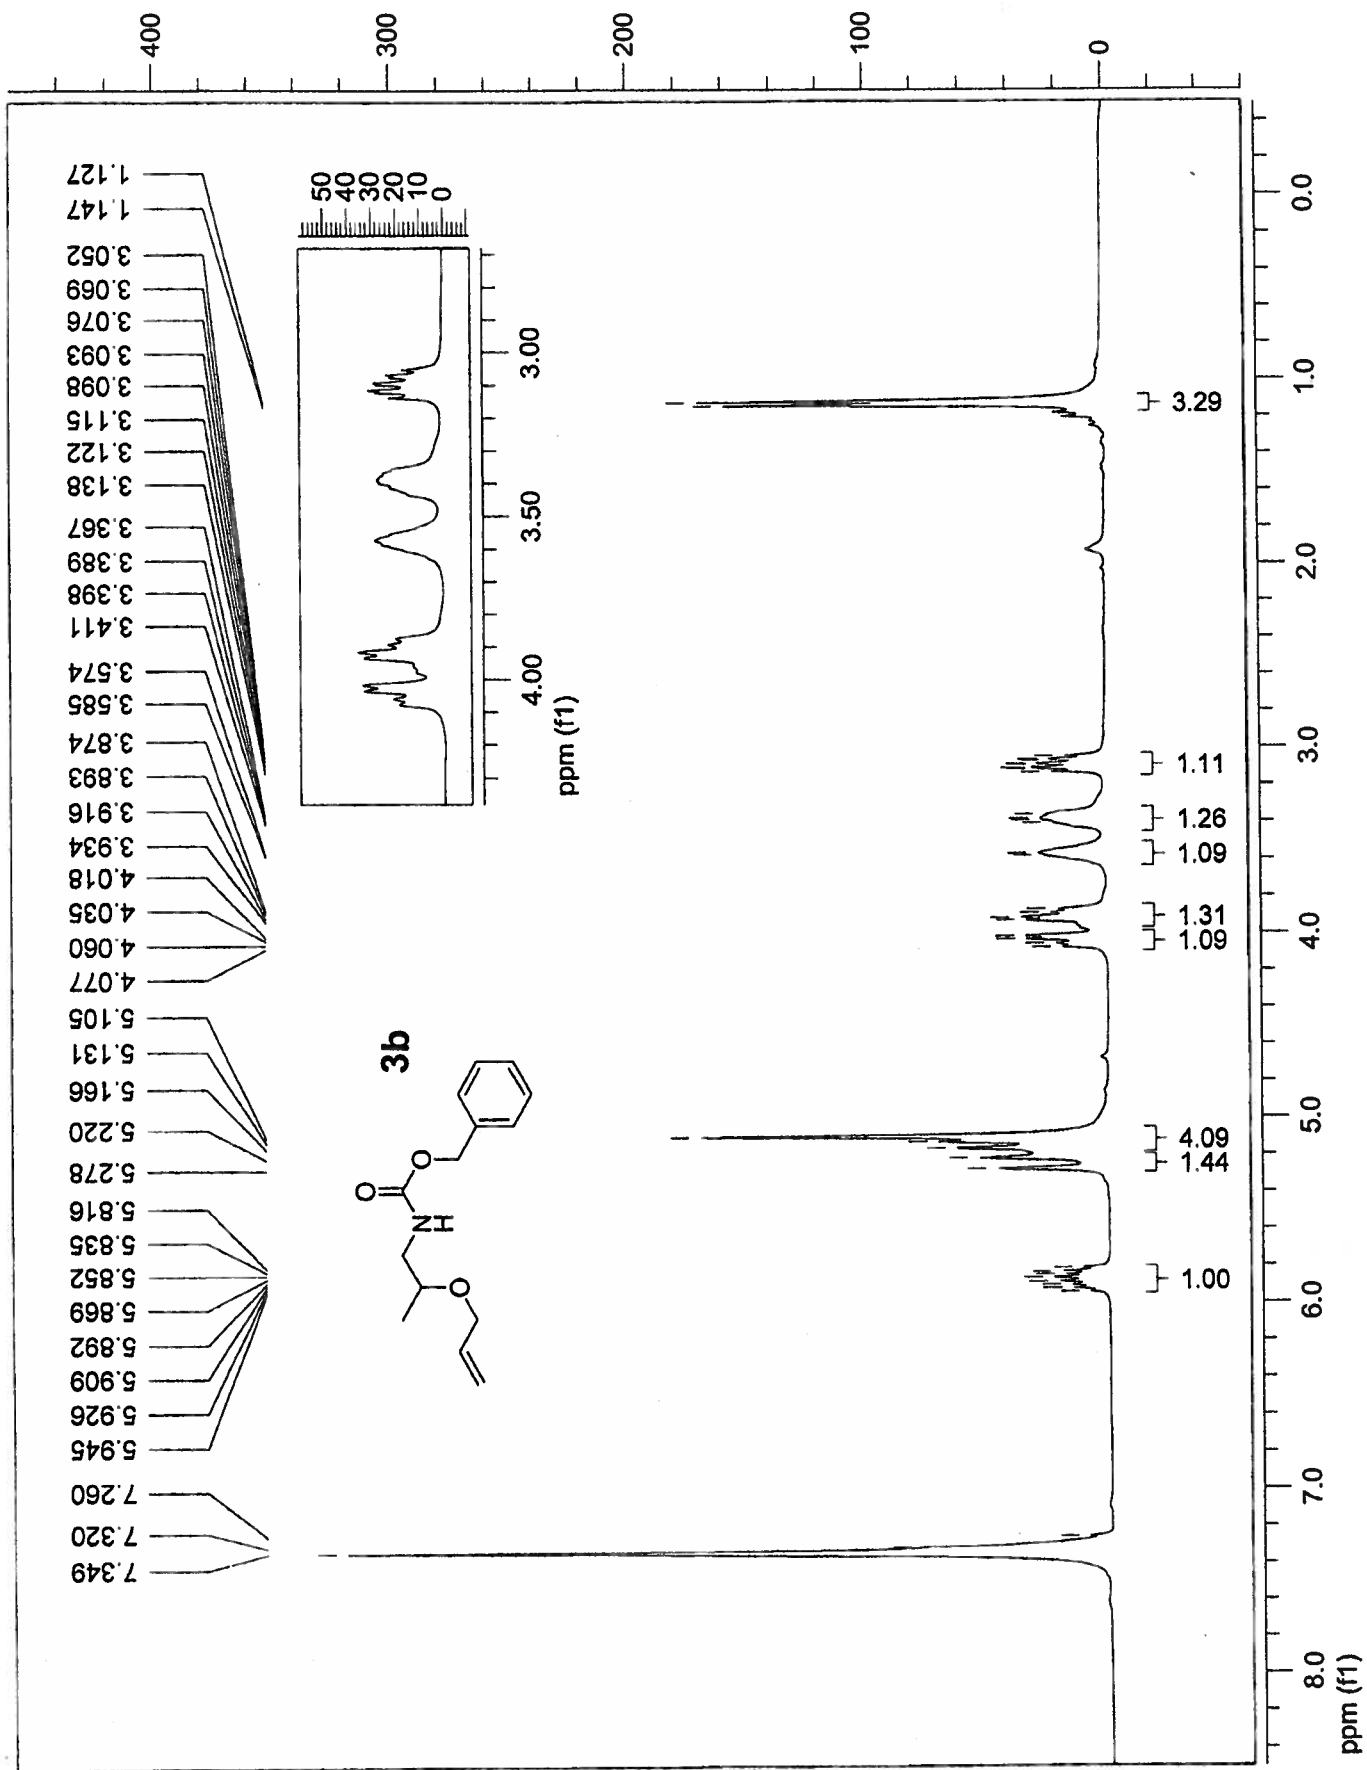

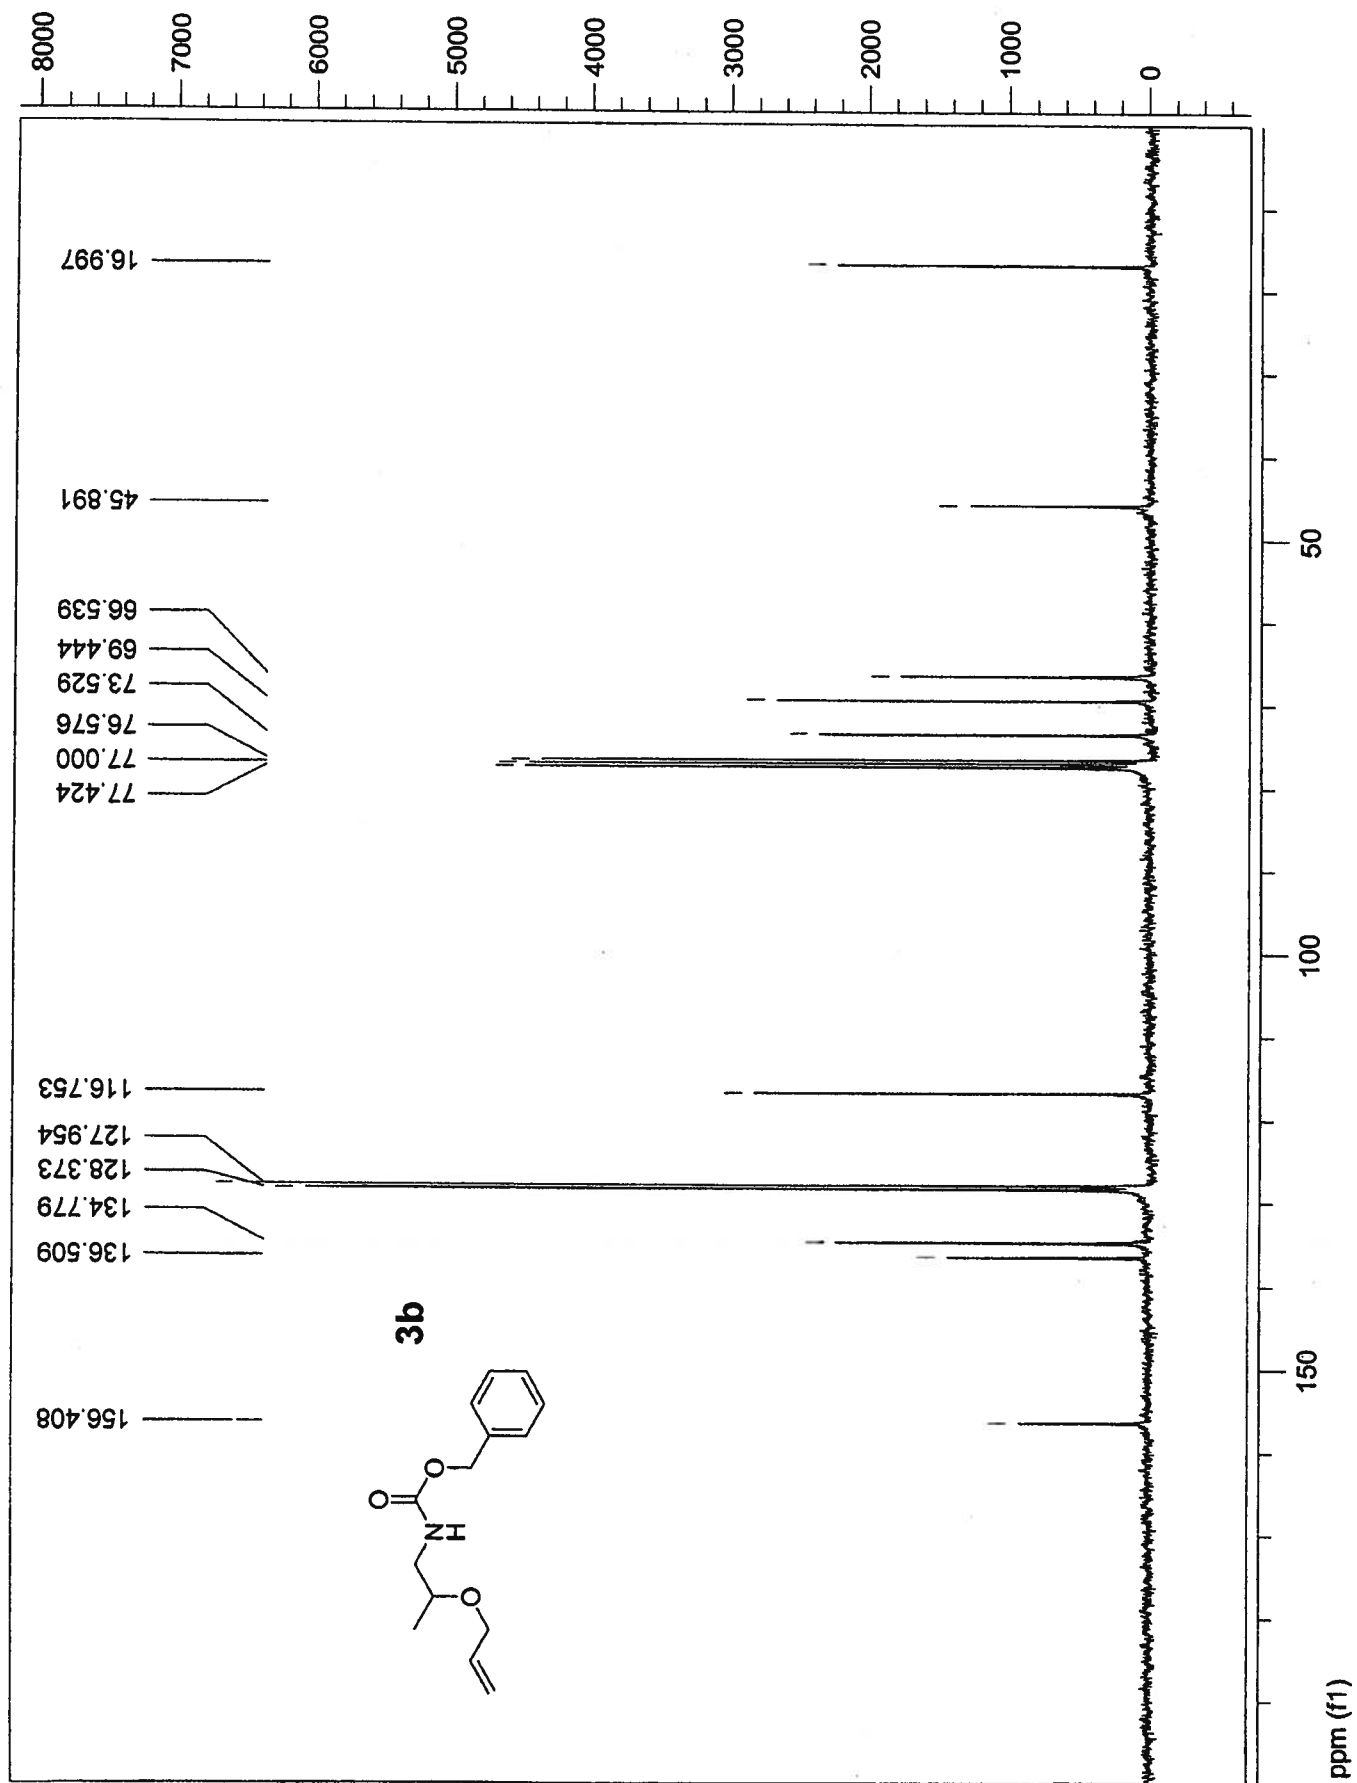

500 MHz, COSY  
CDCl<sub>3</sub>

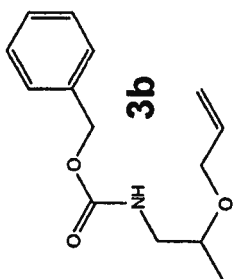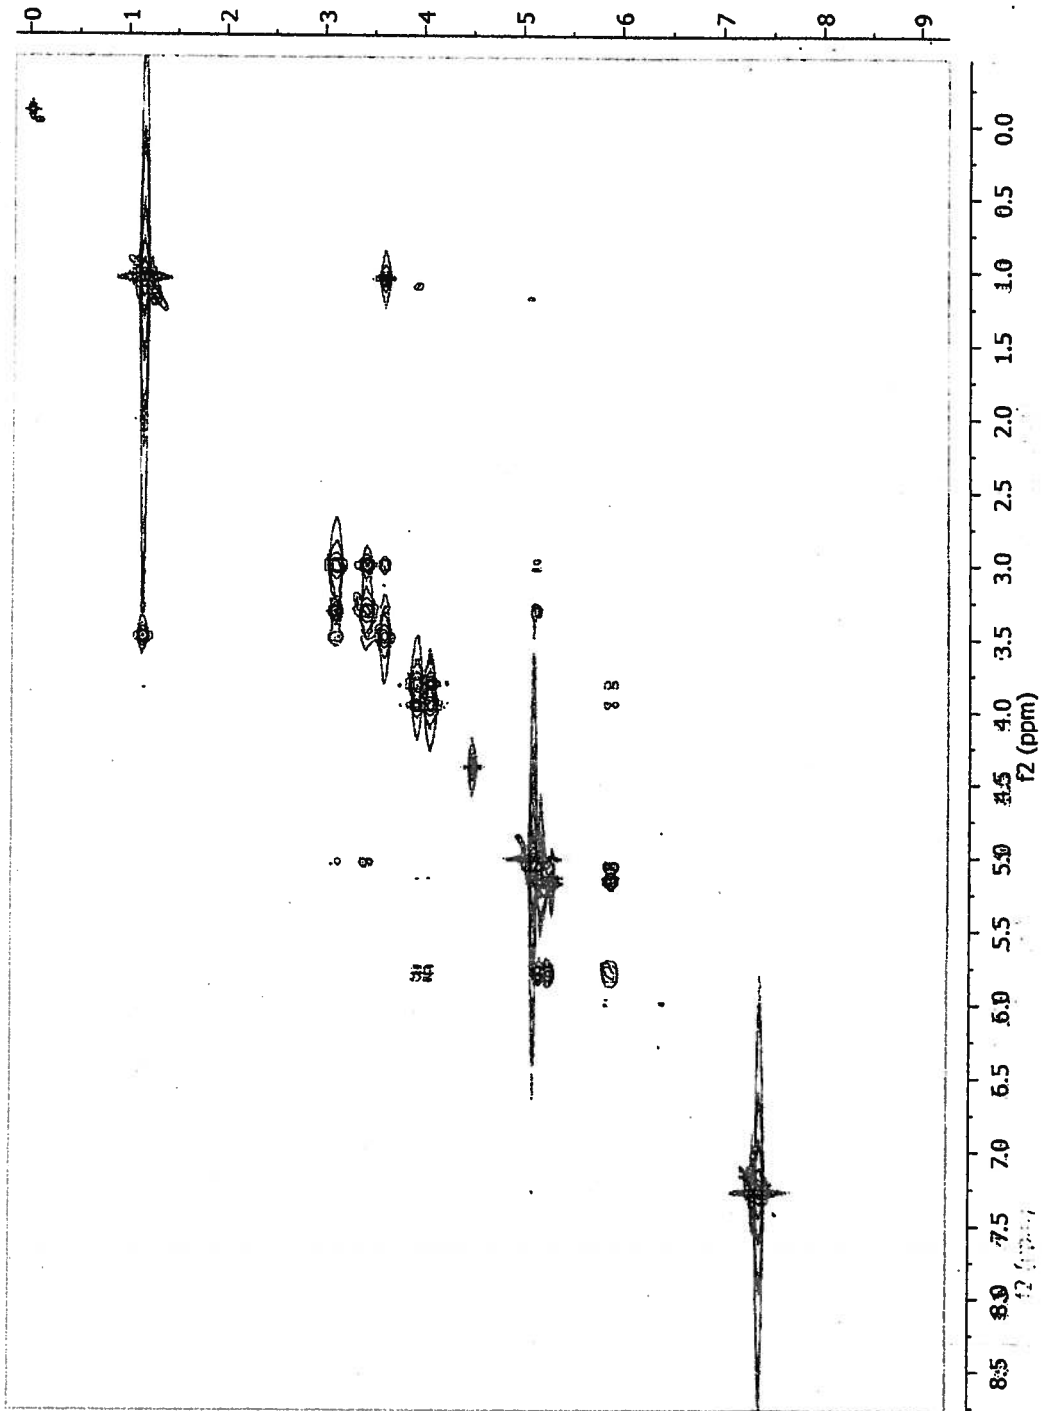

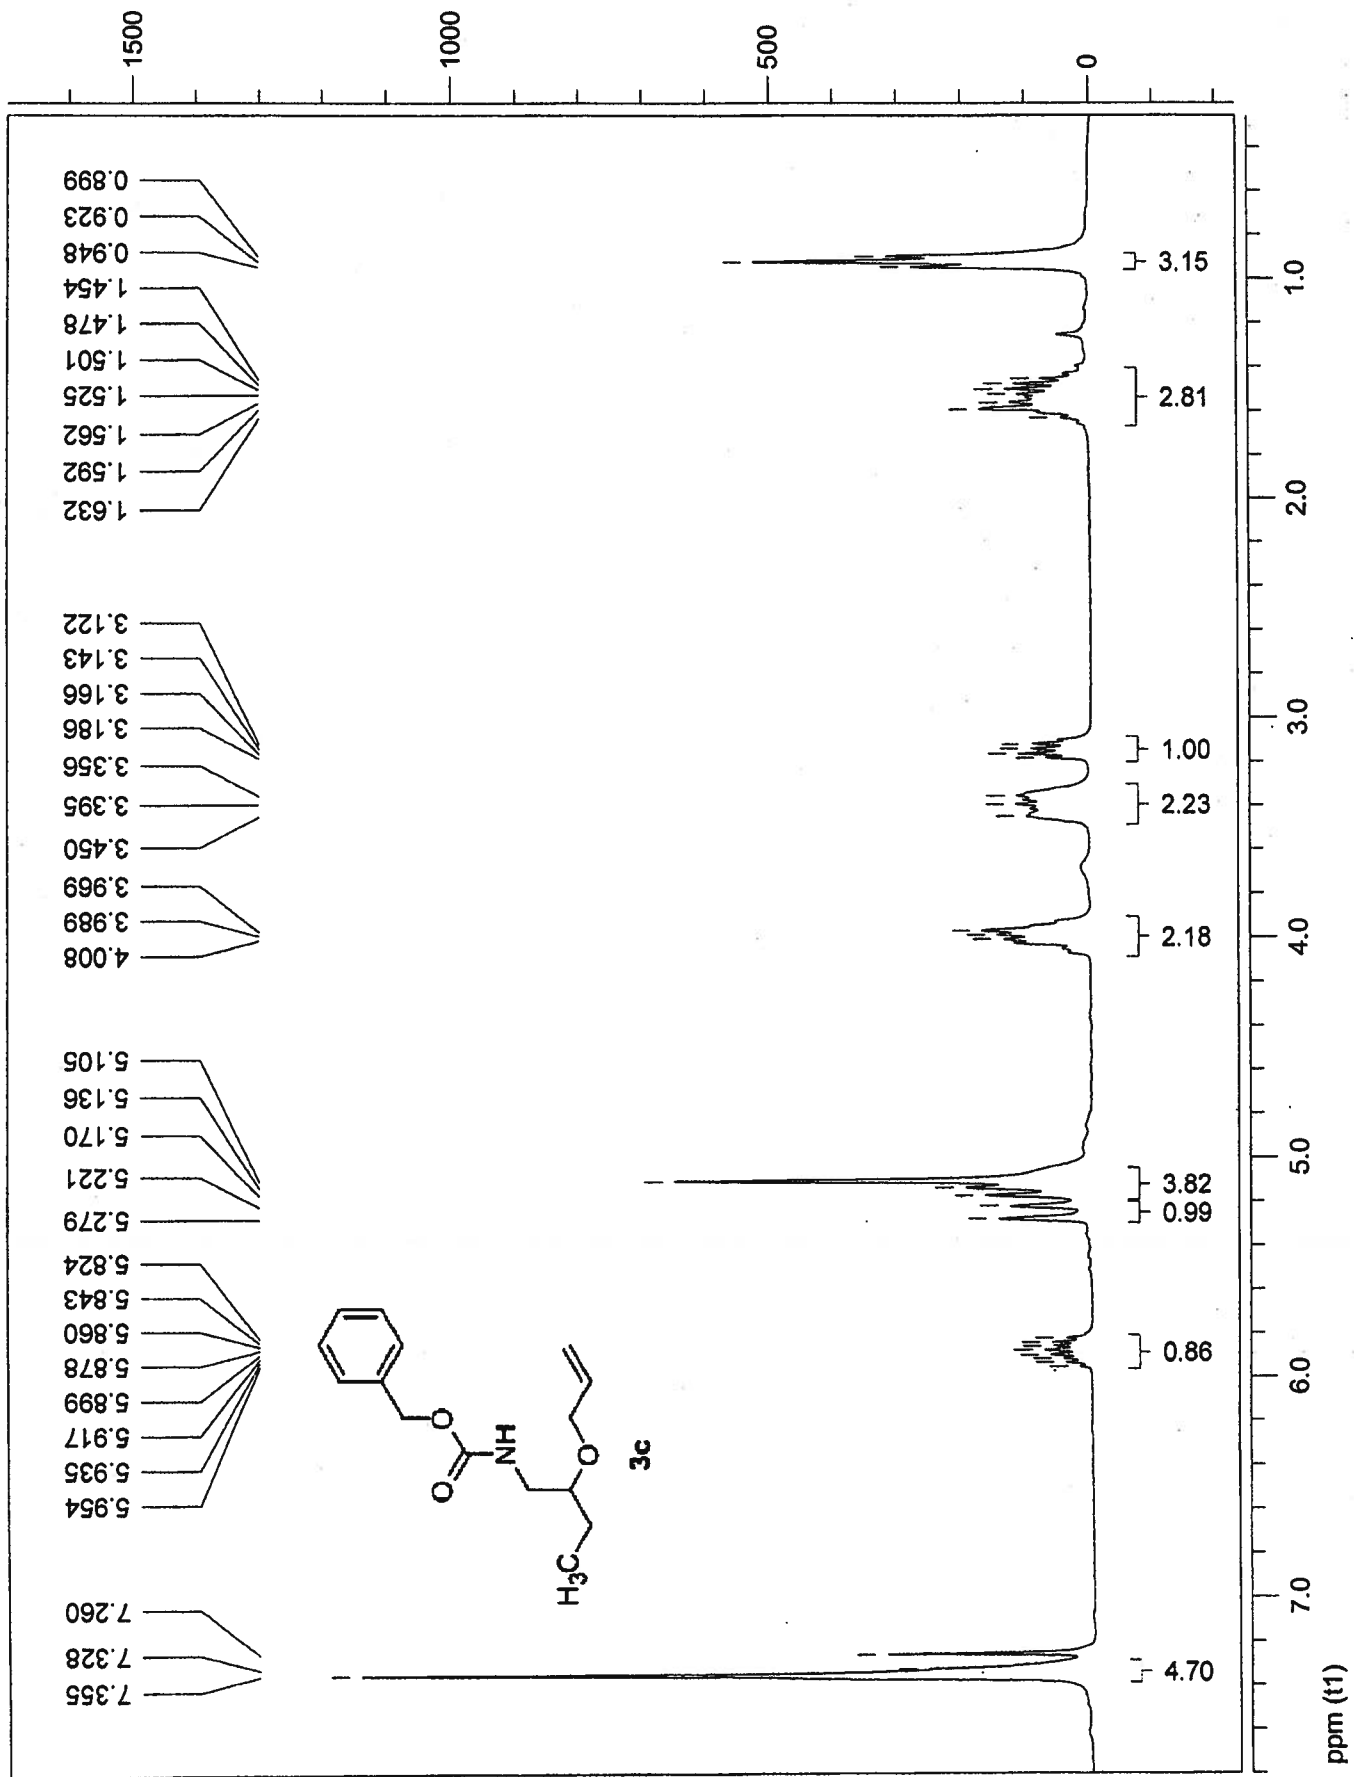

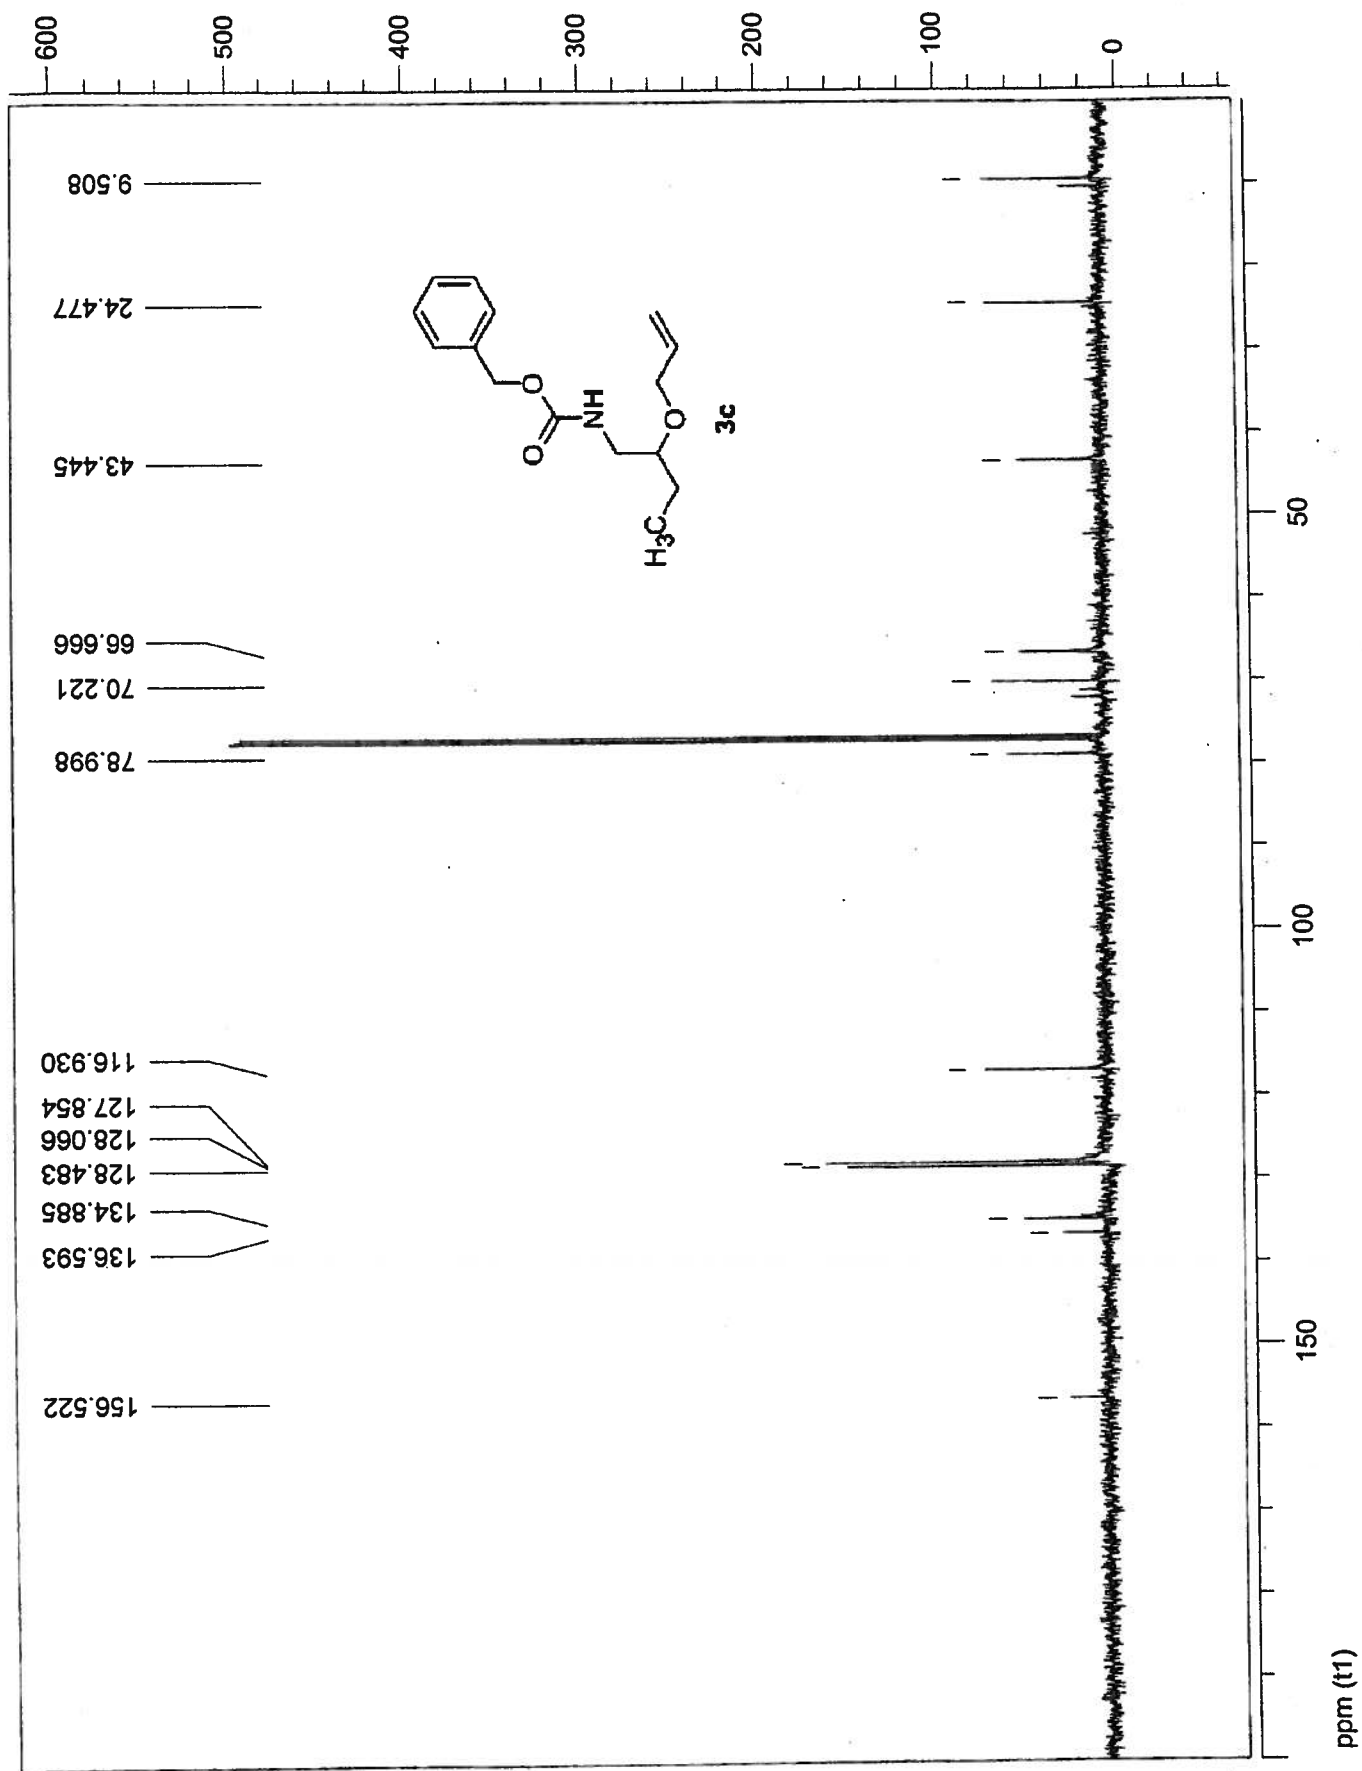

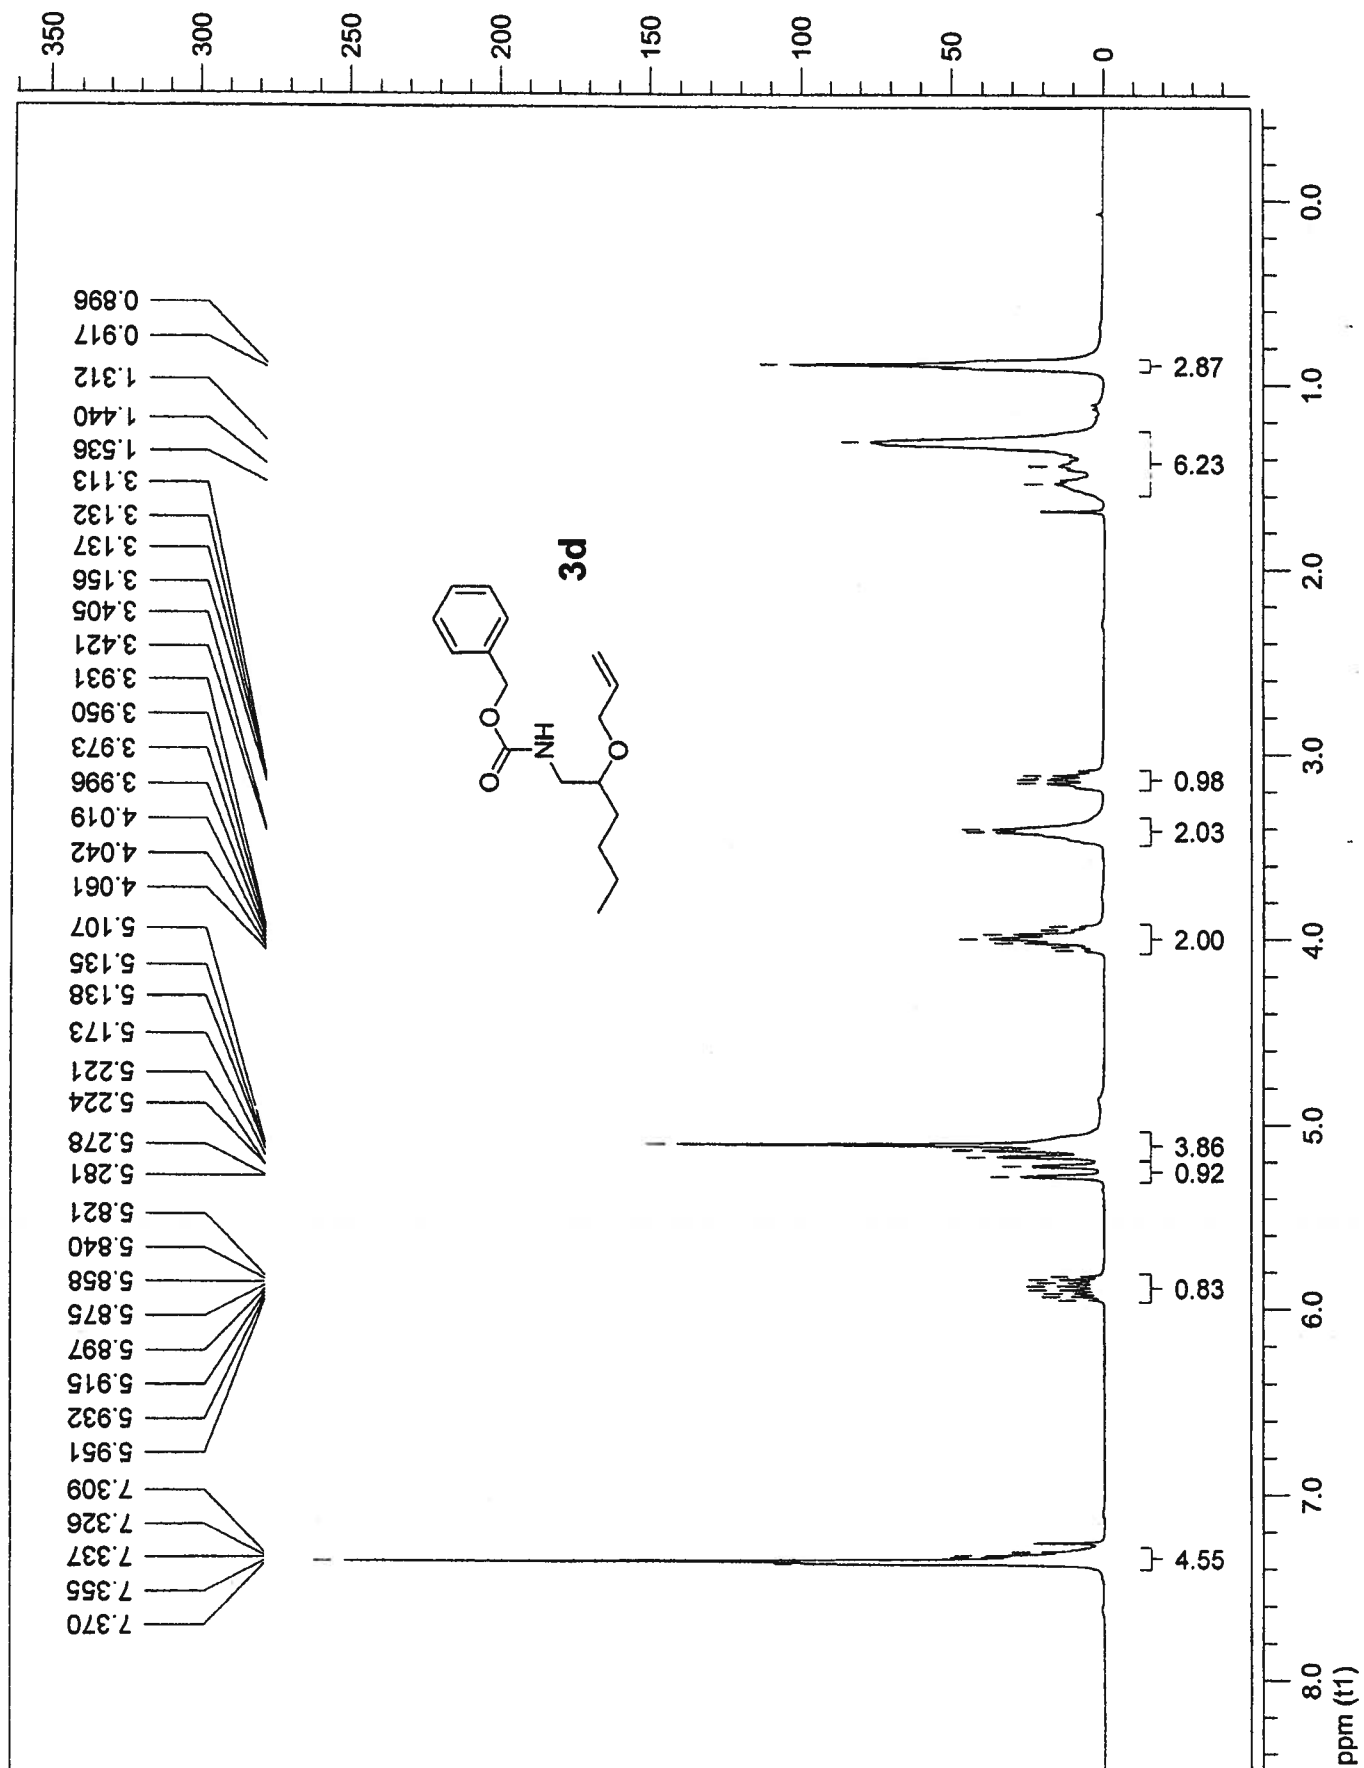



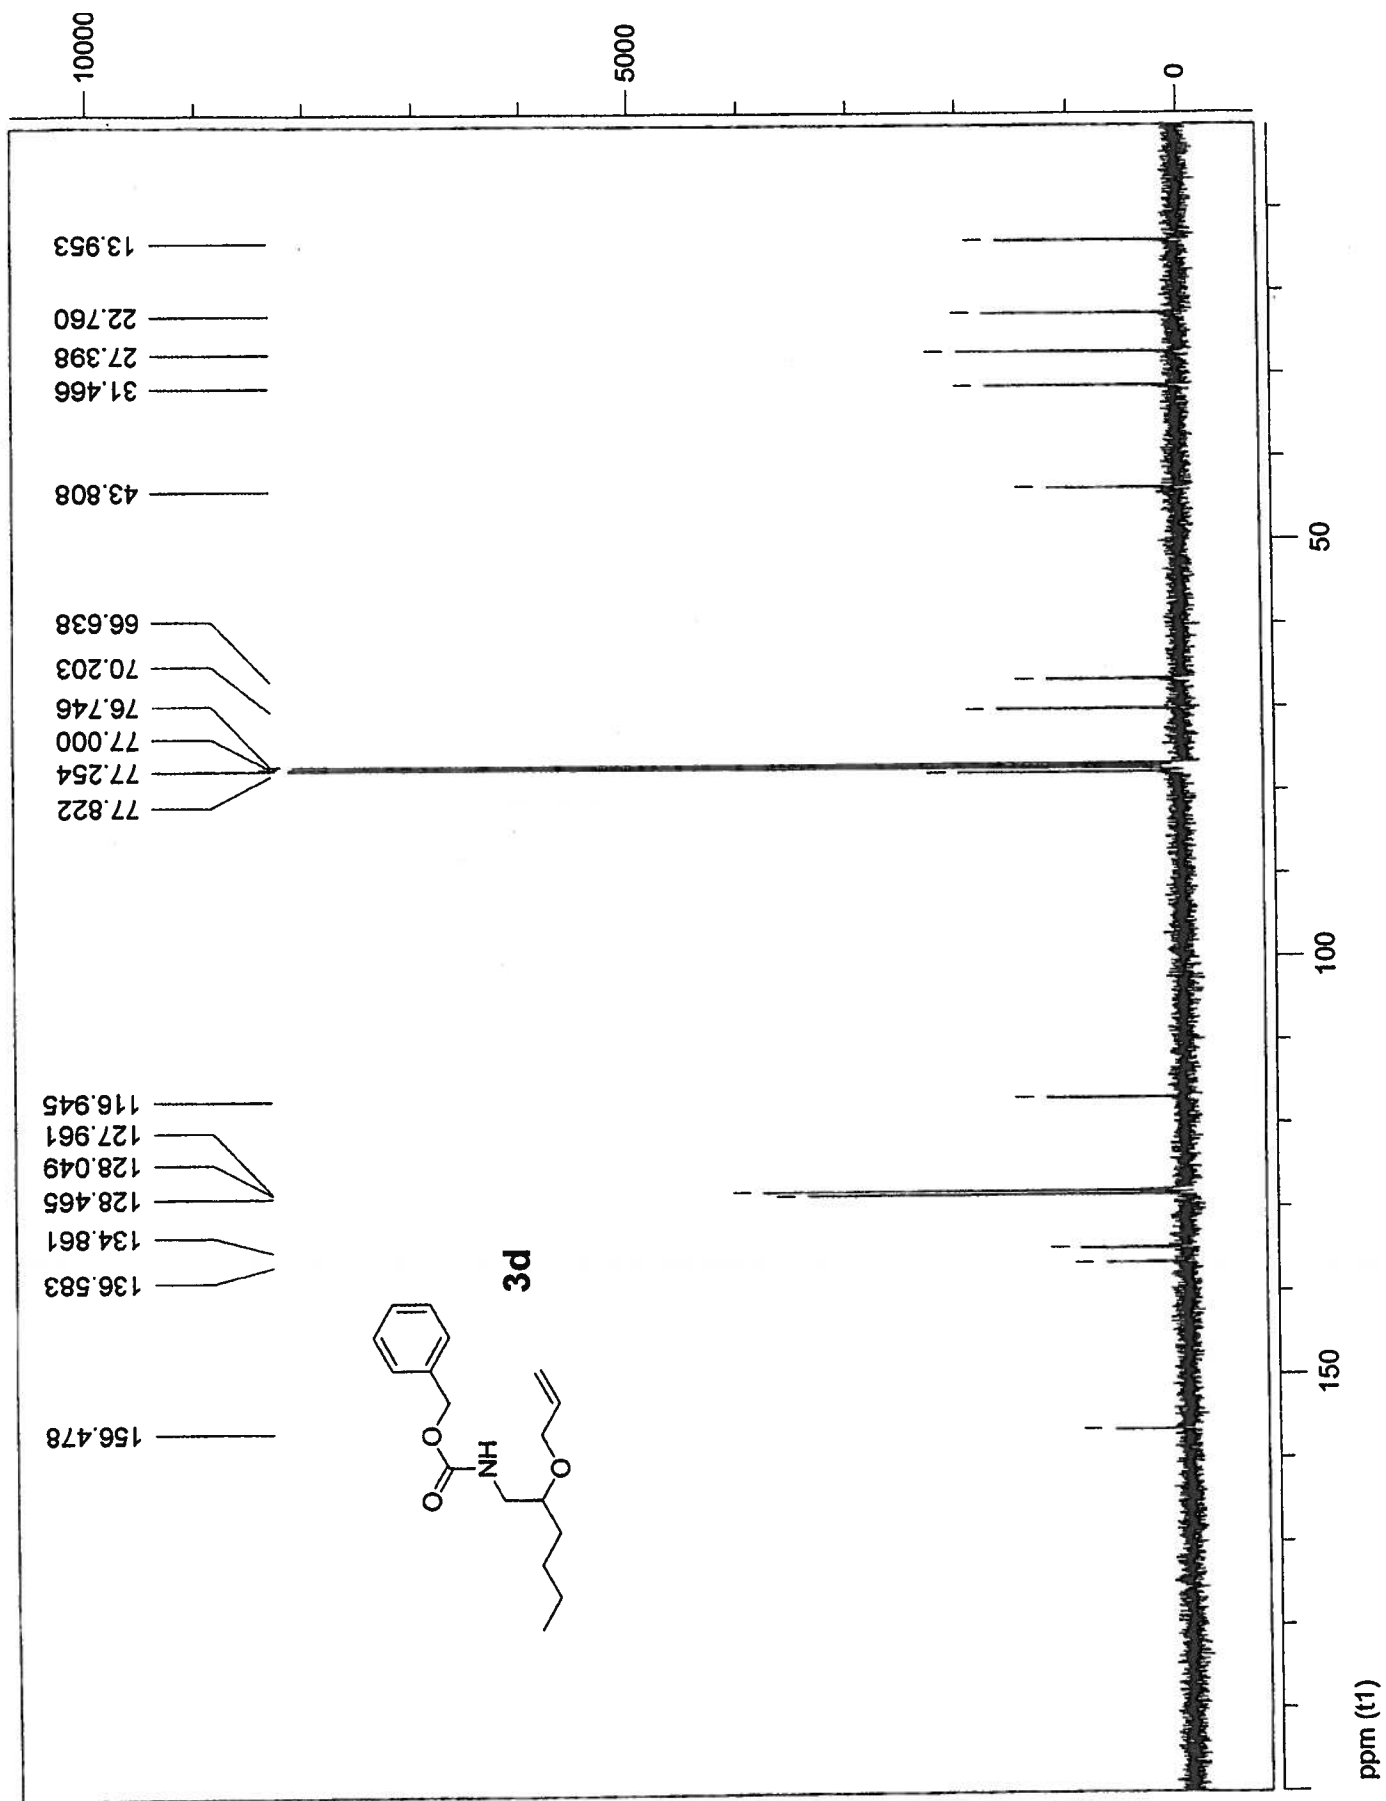

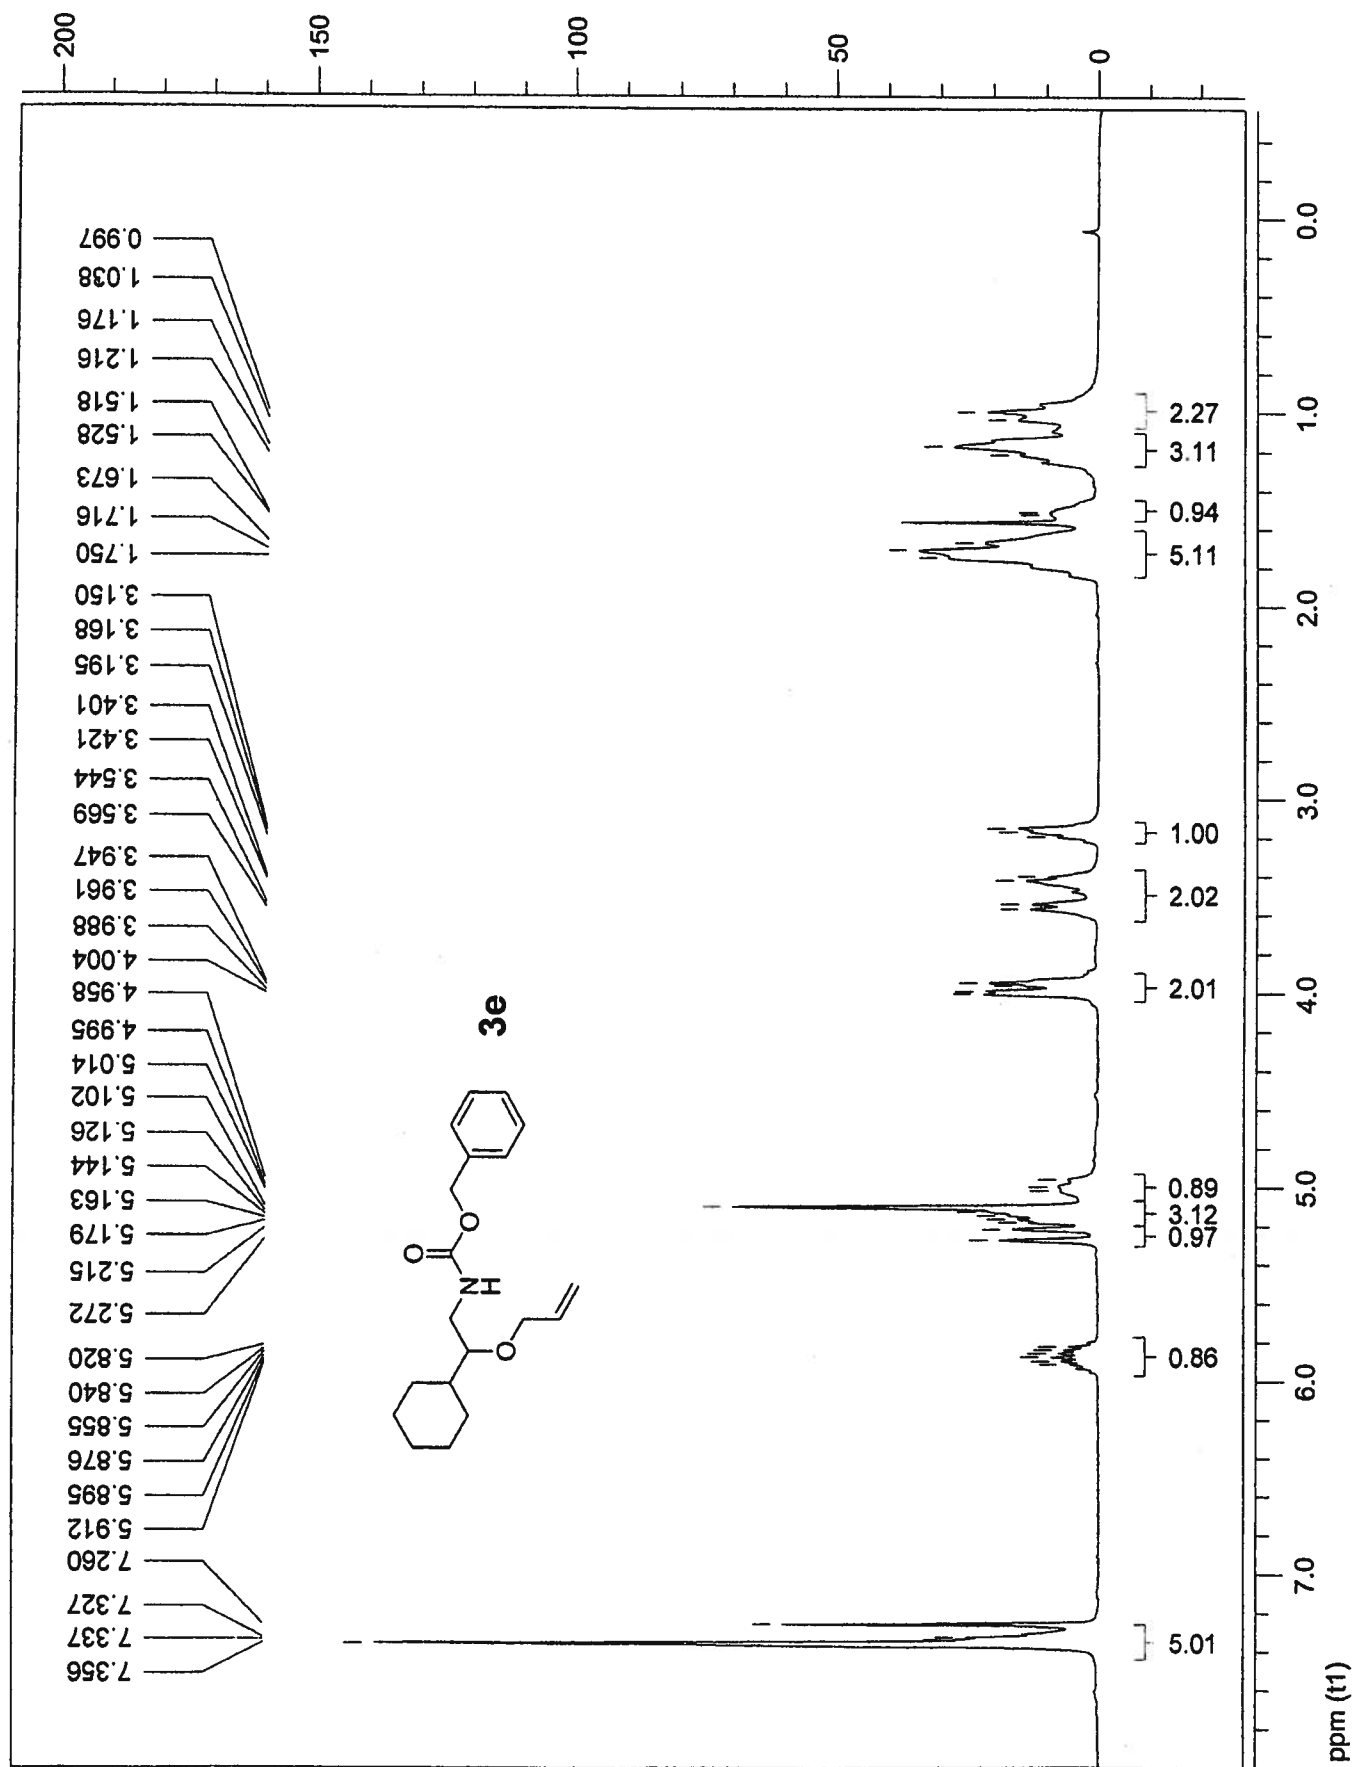

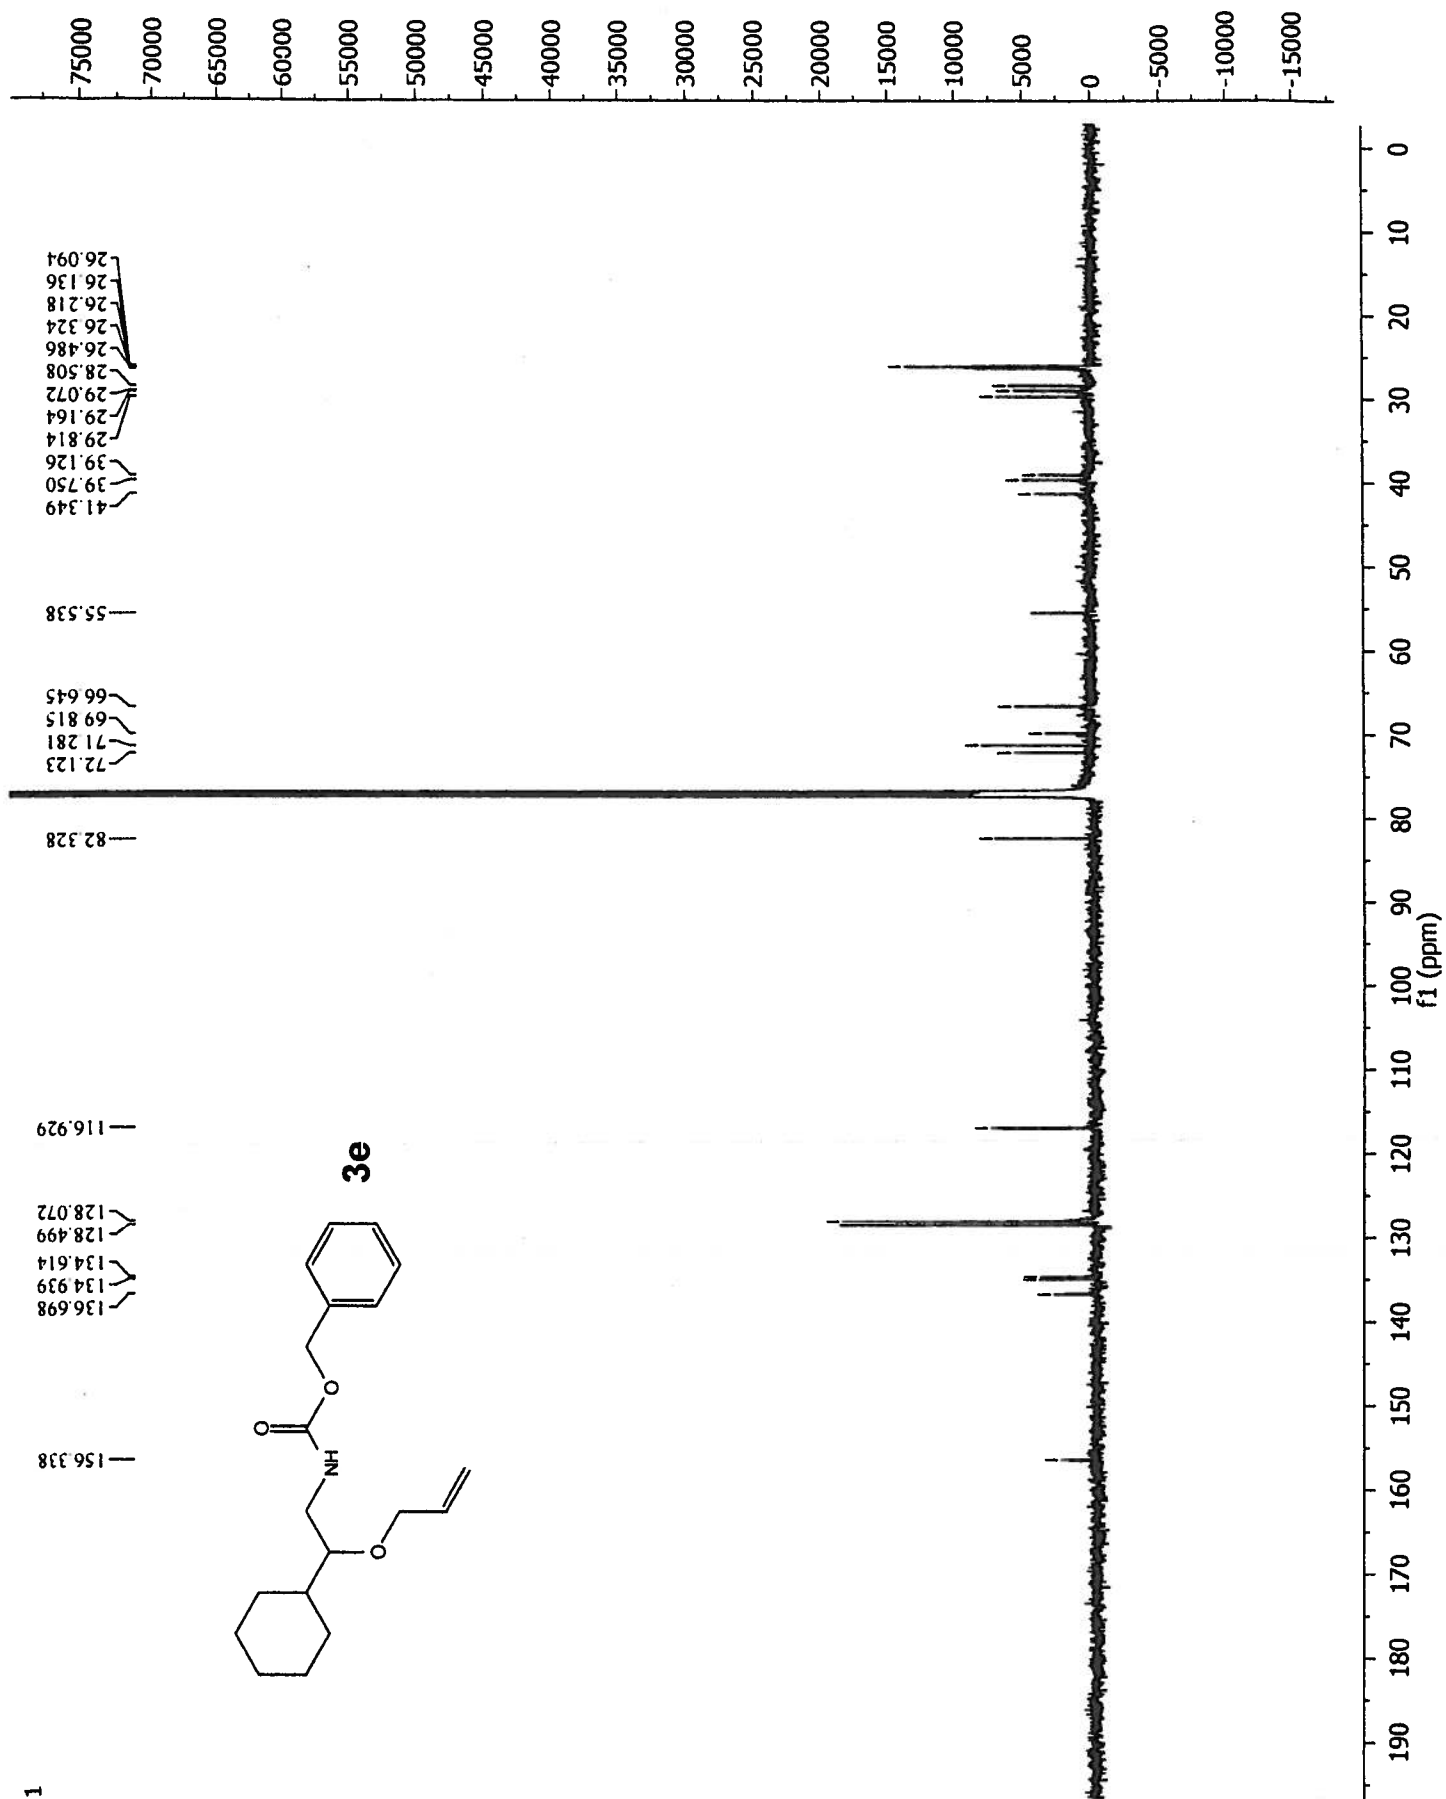

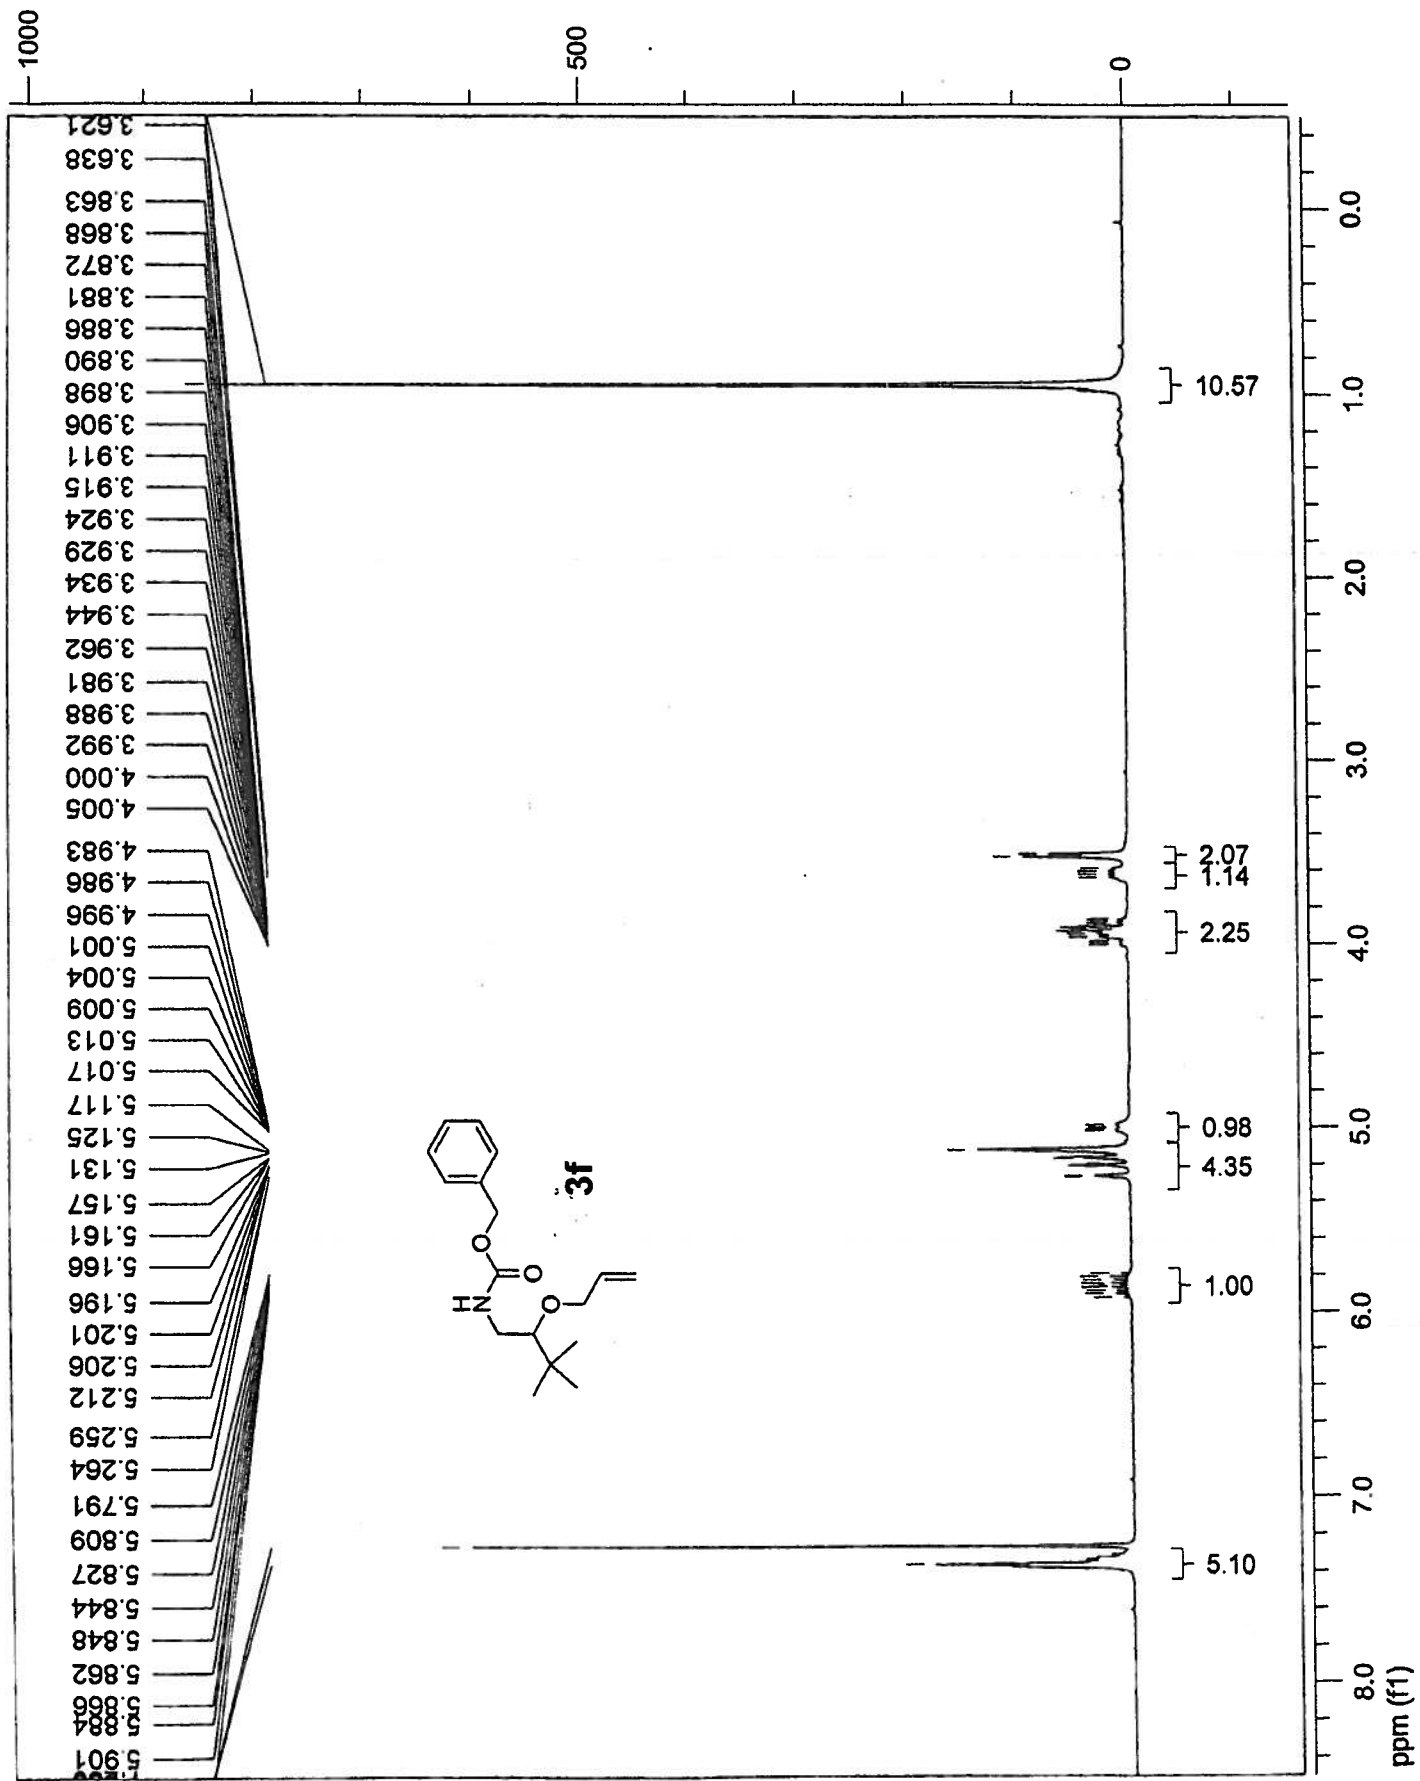

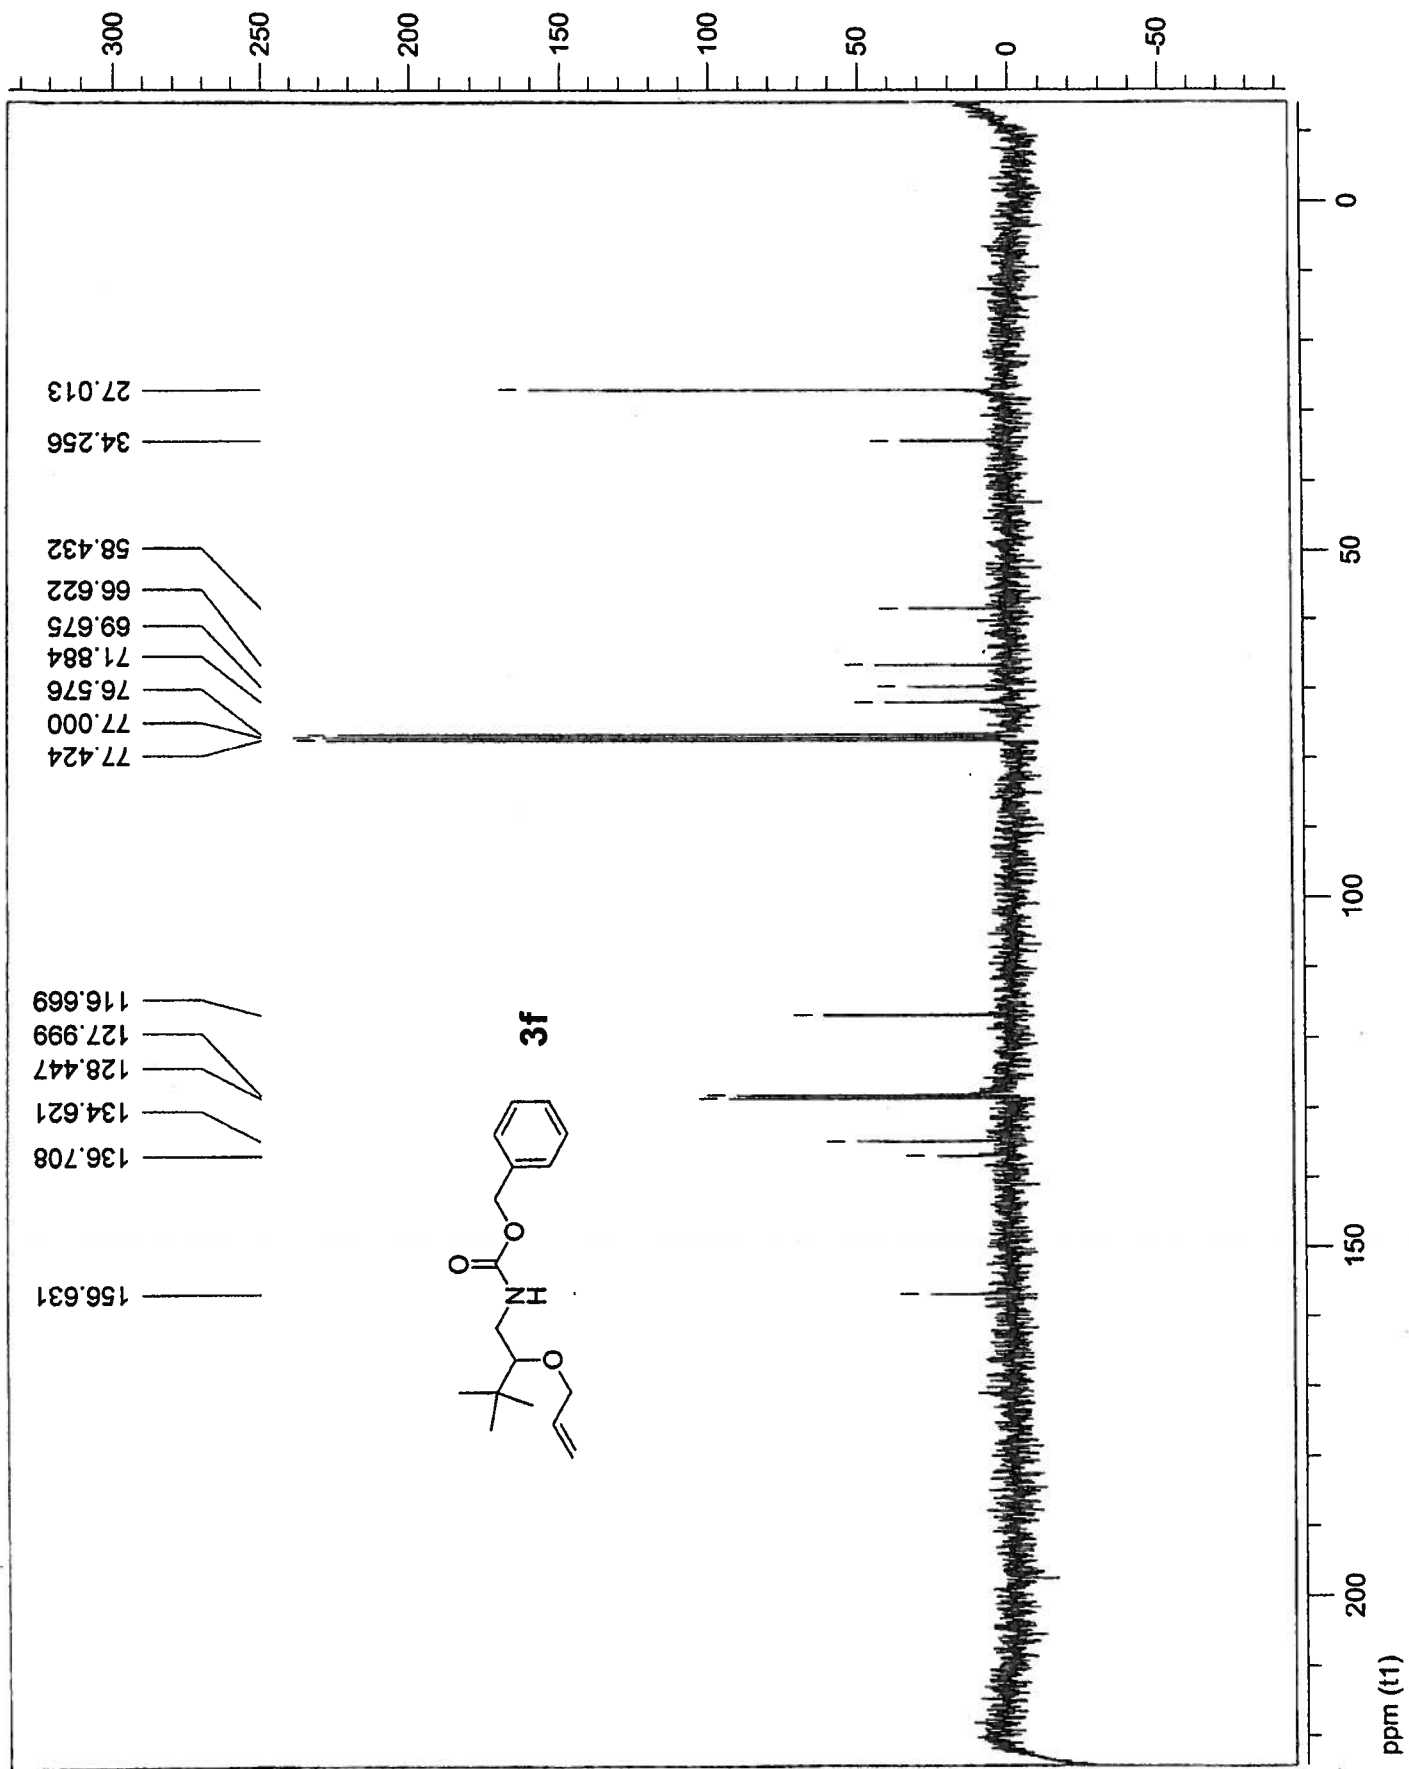

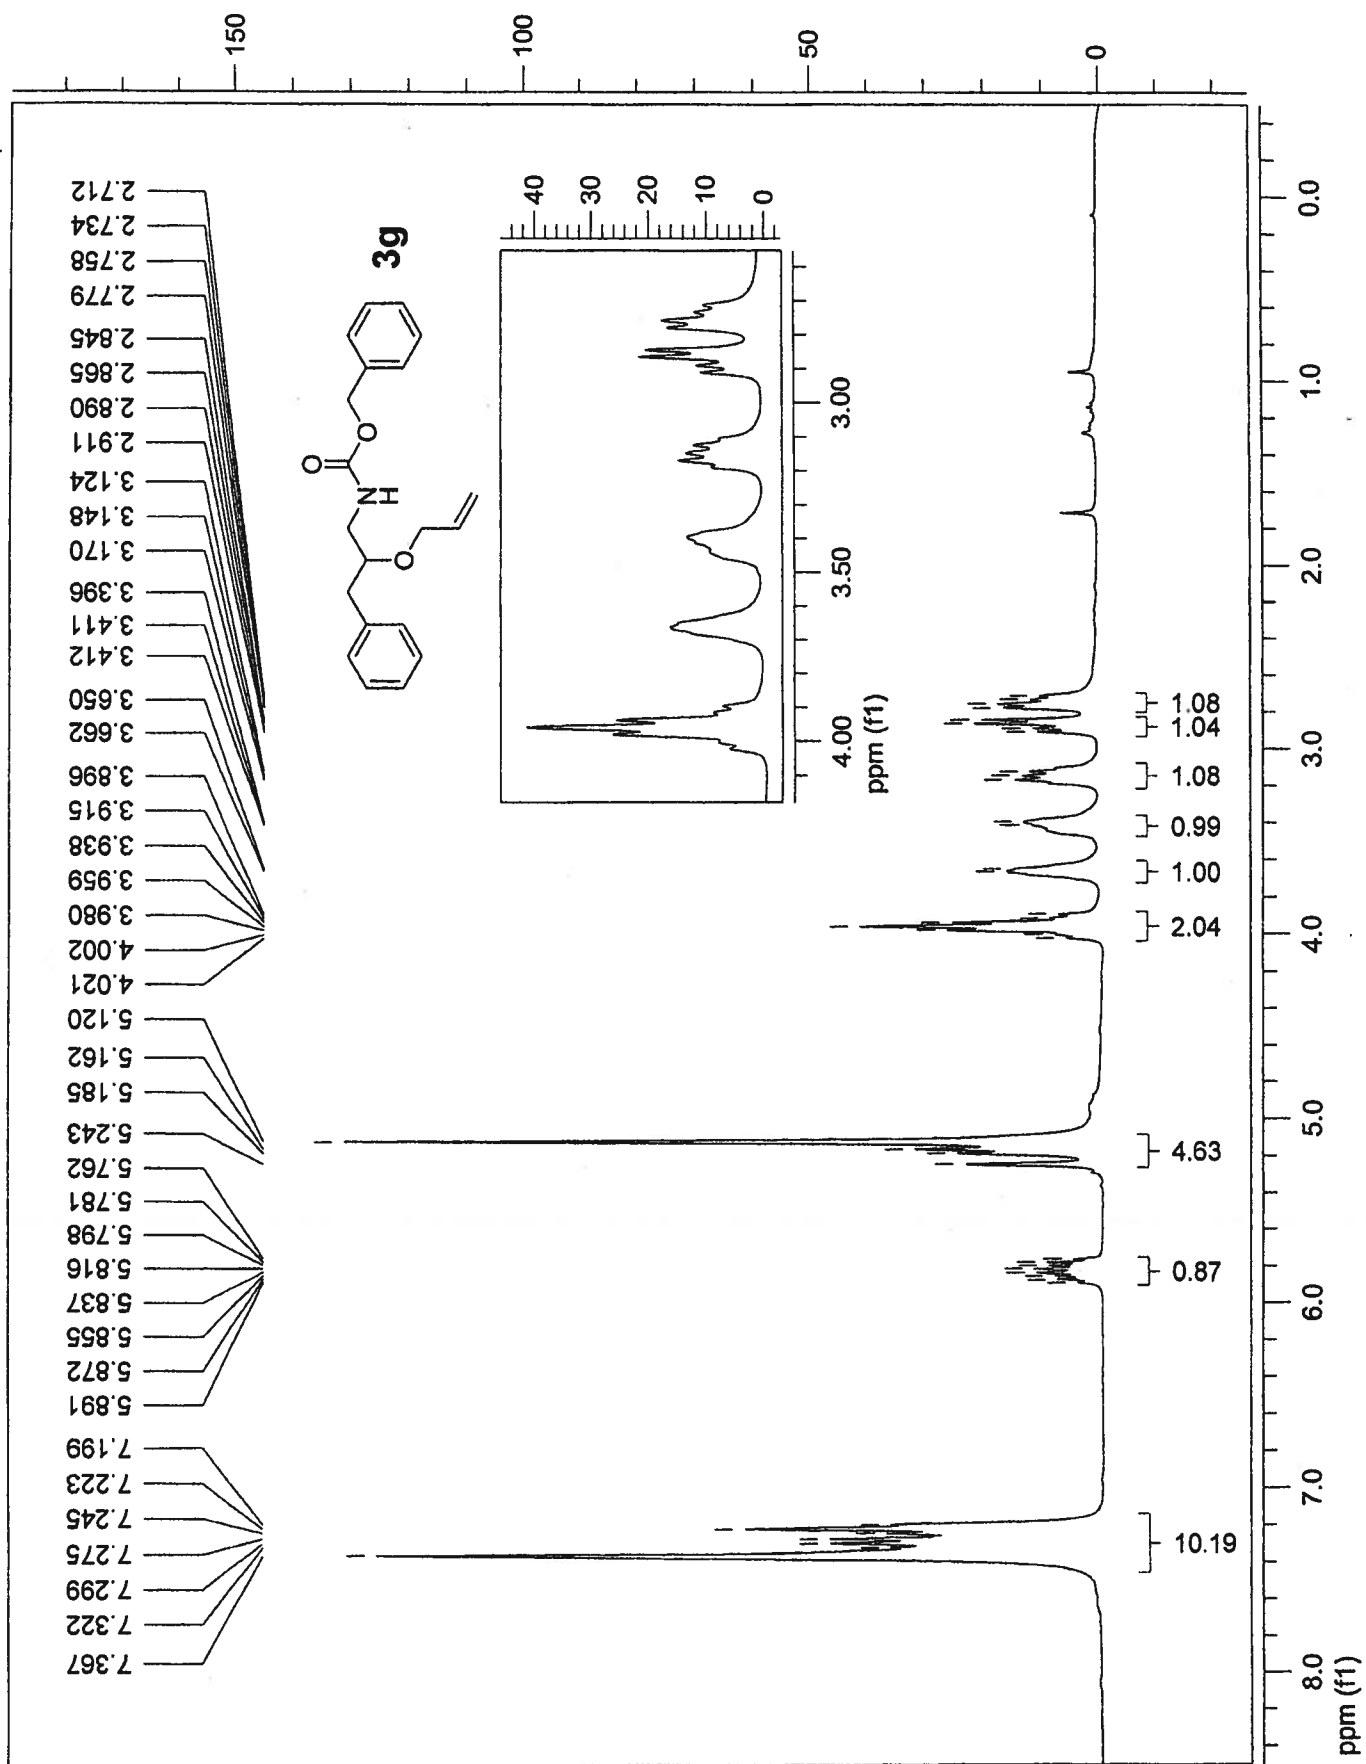

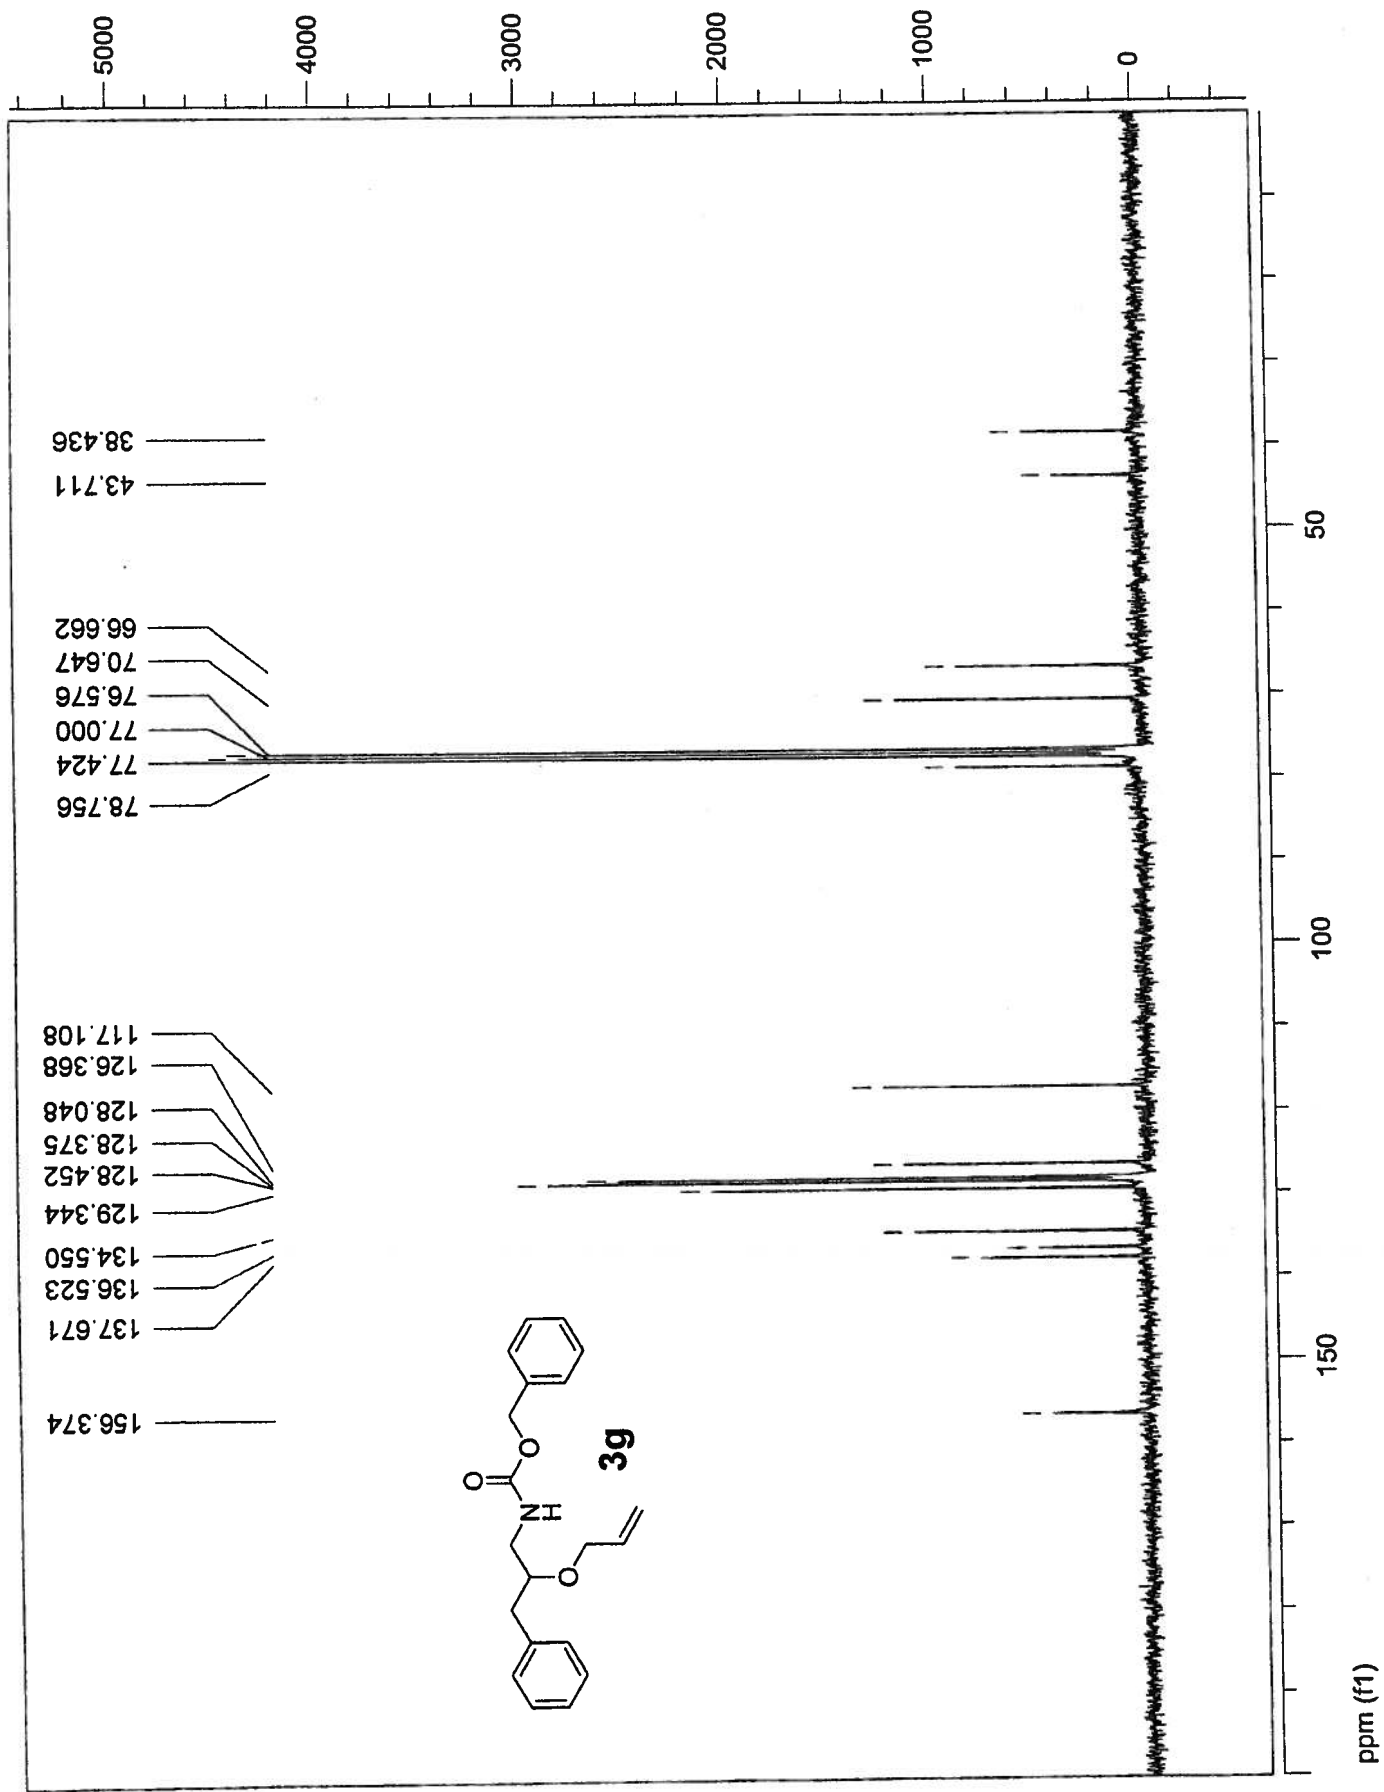

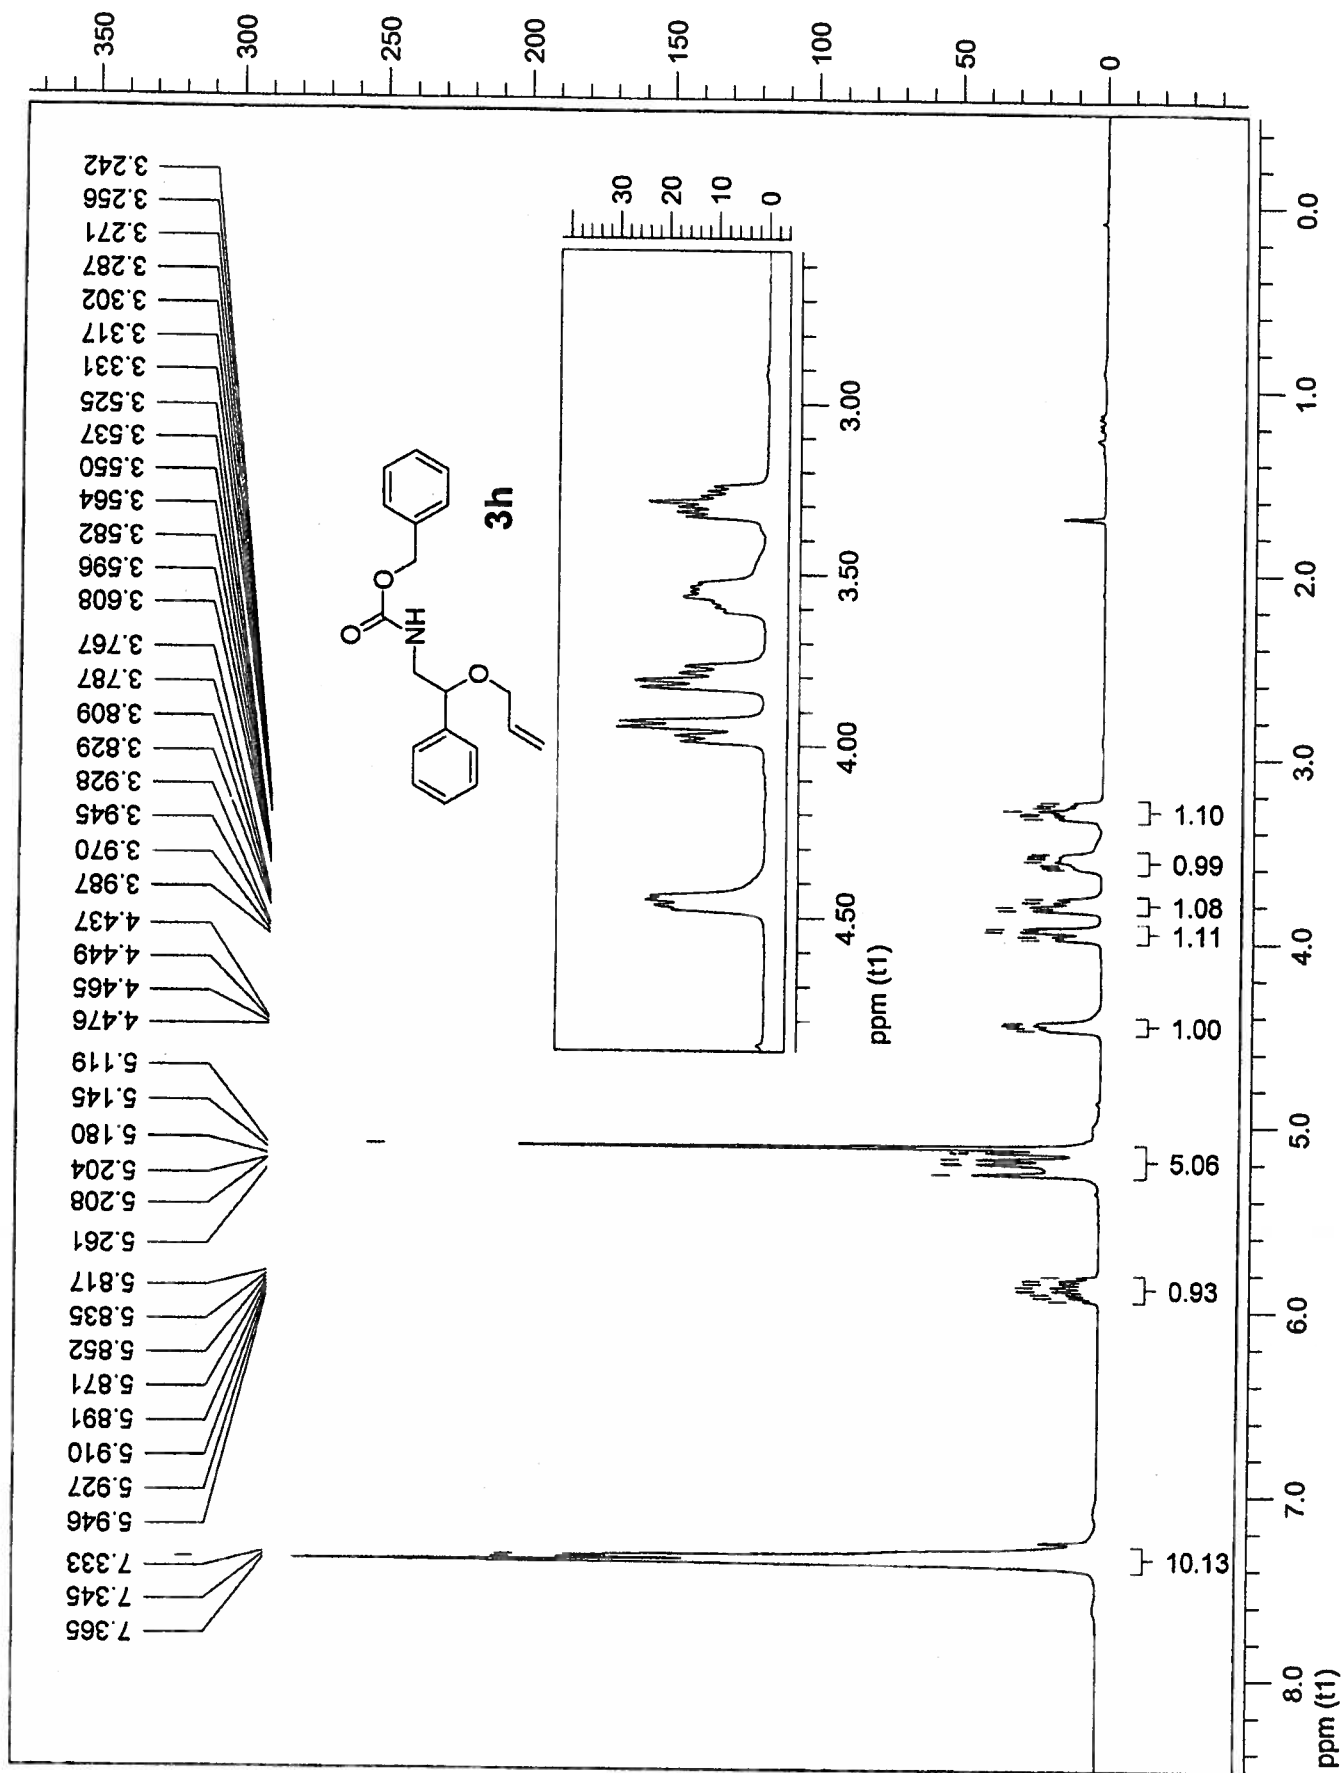



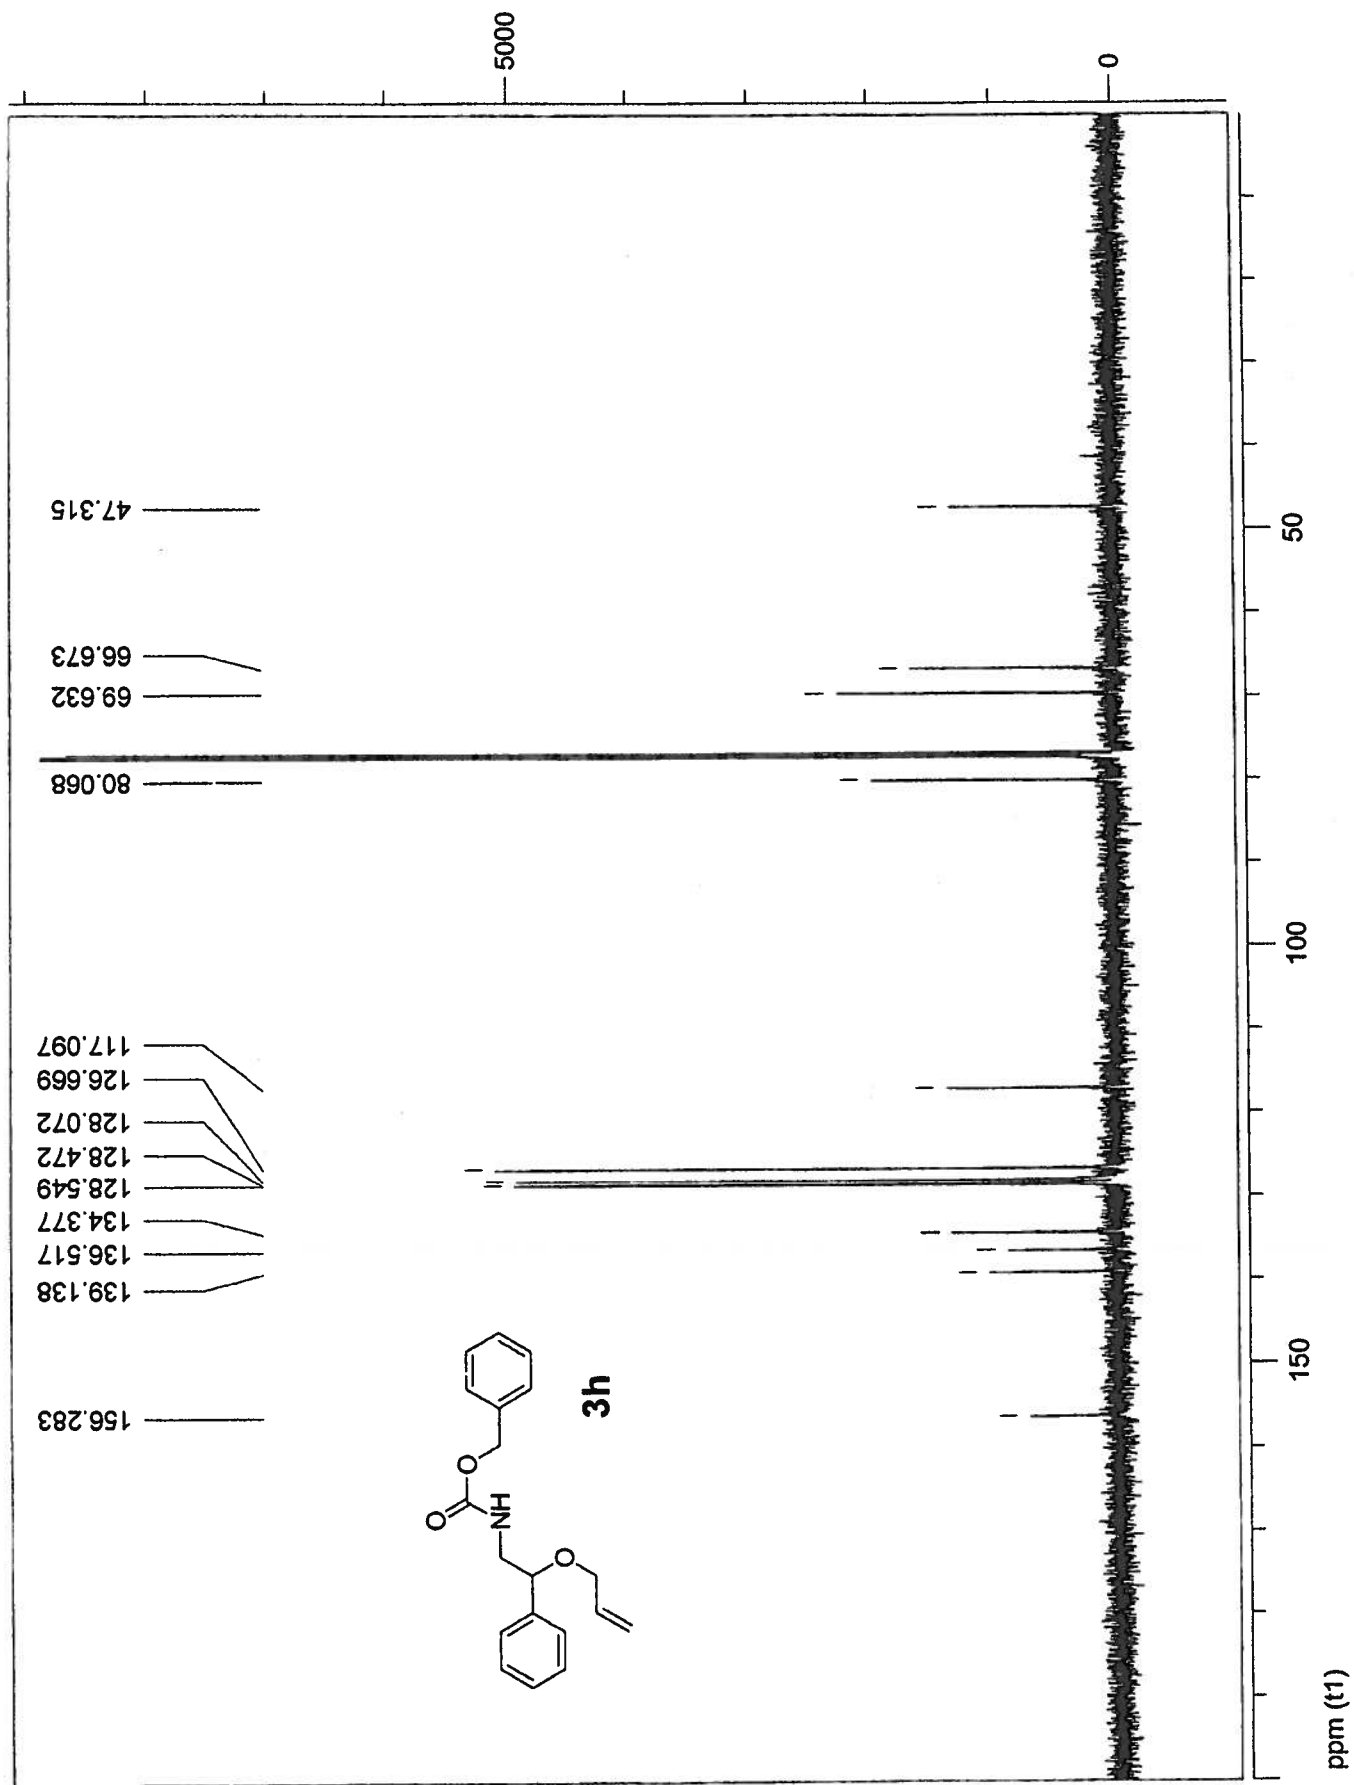

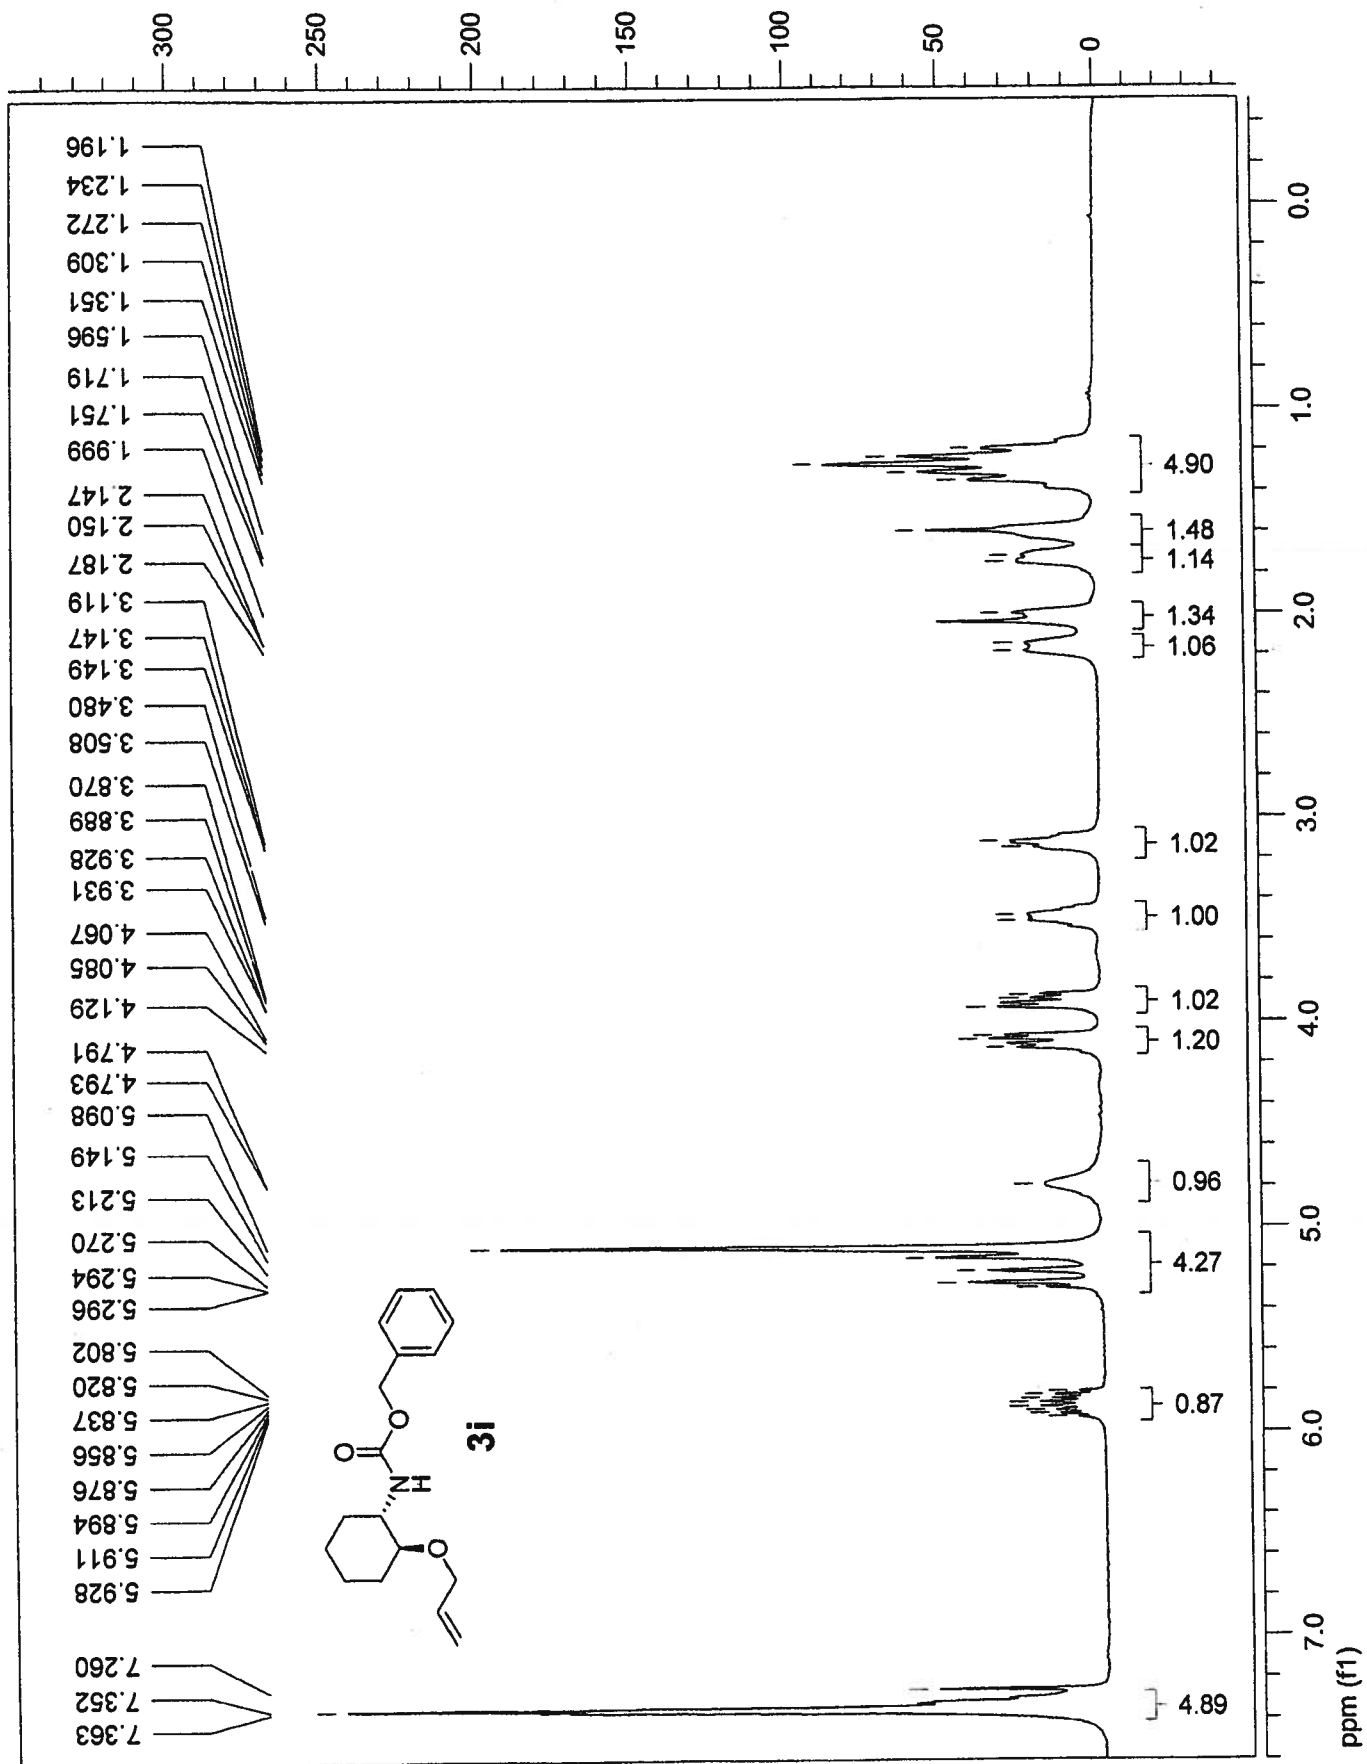

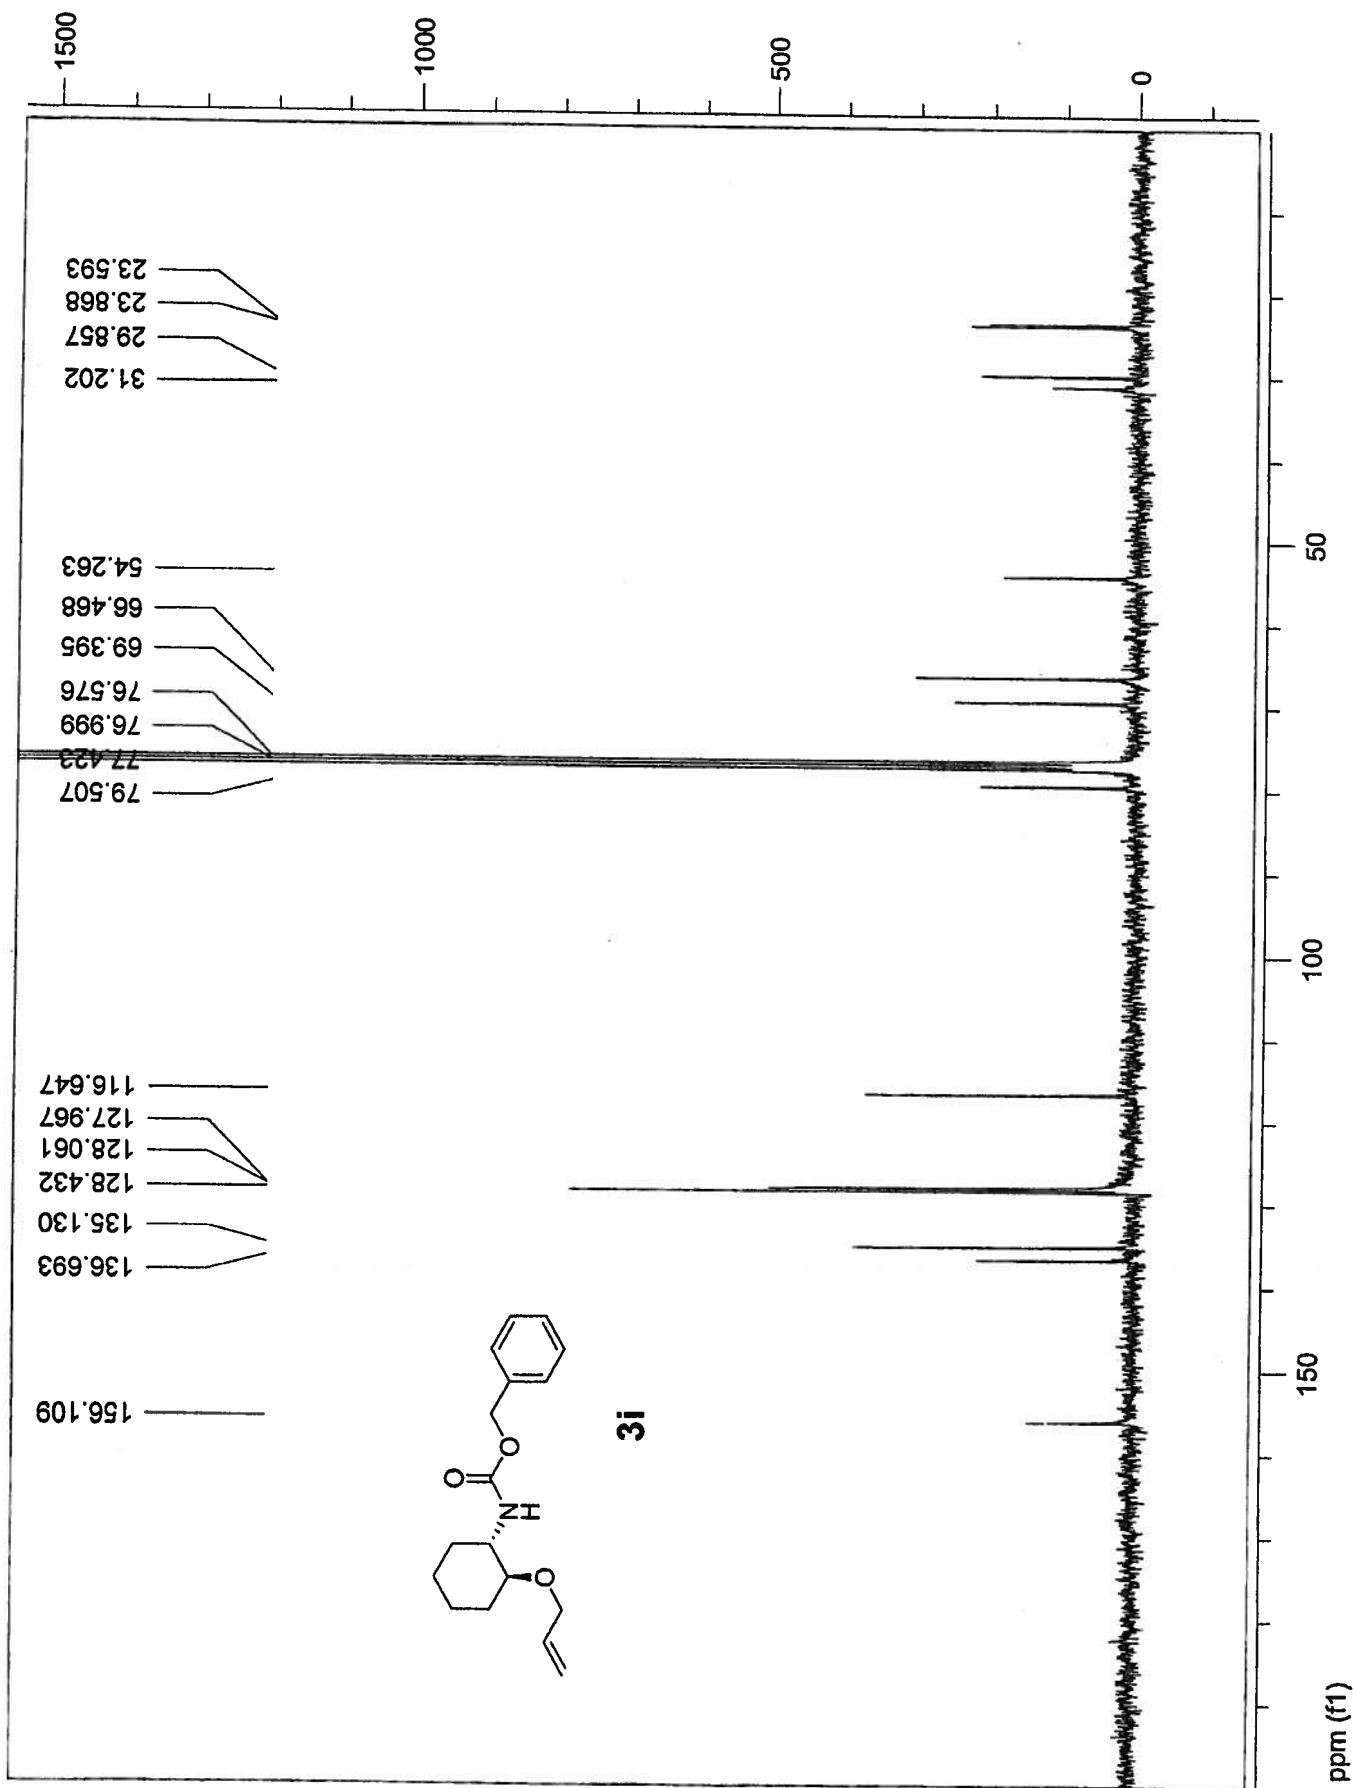

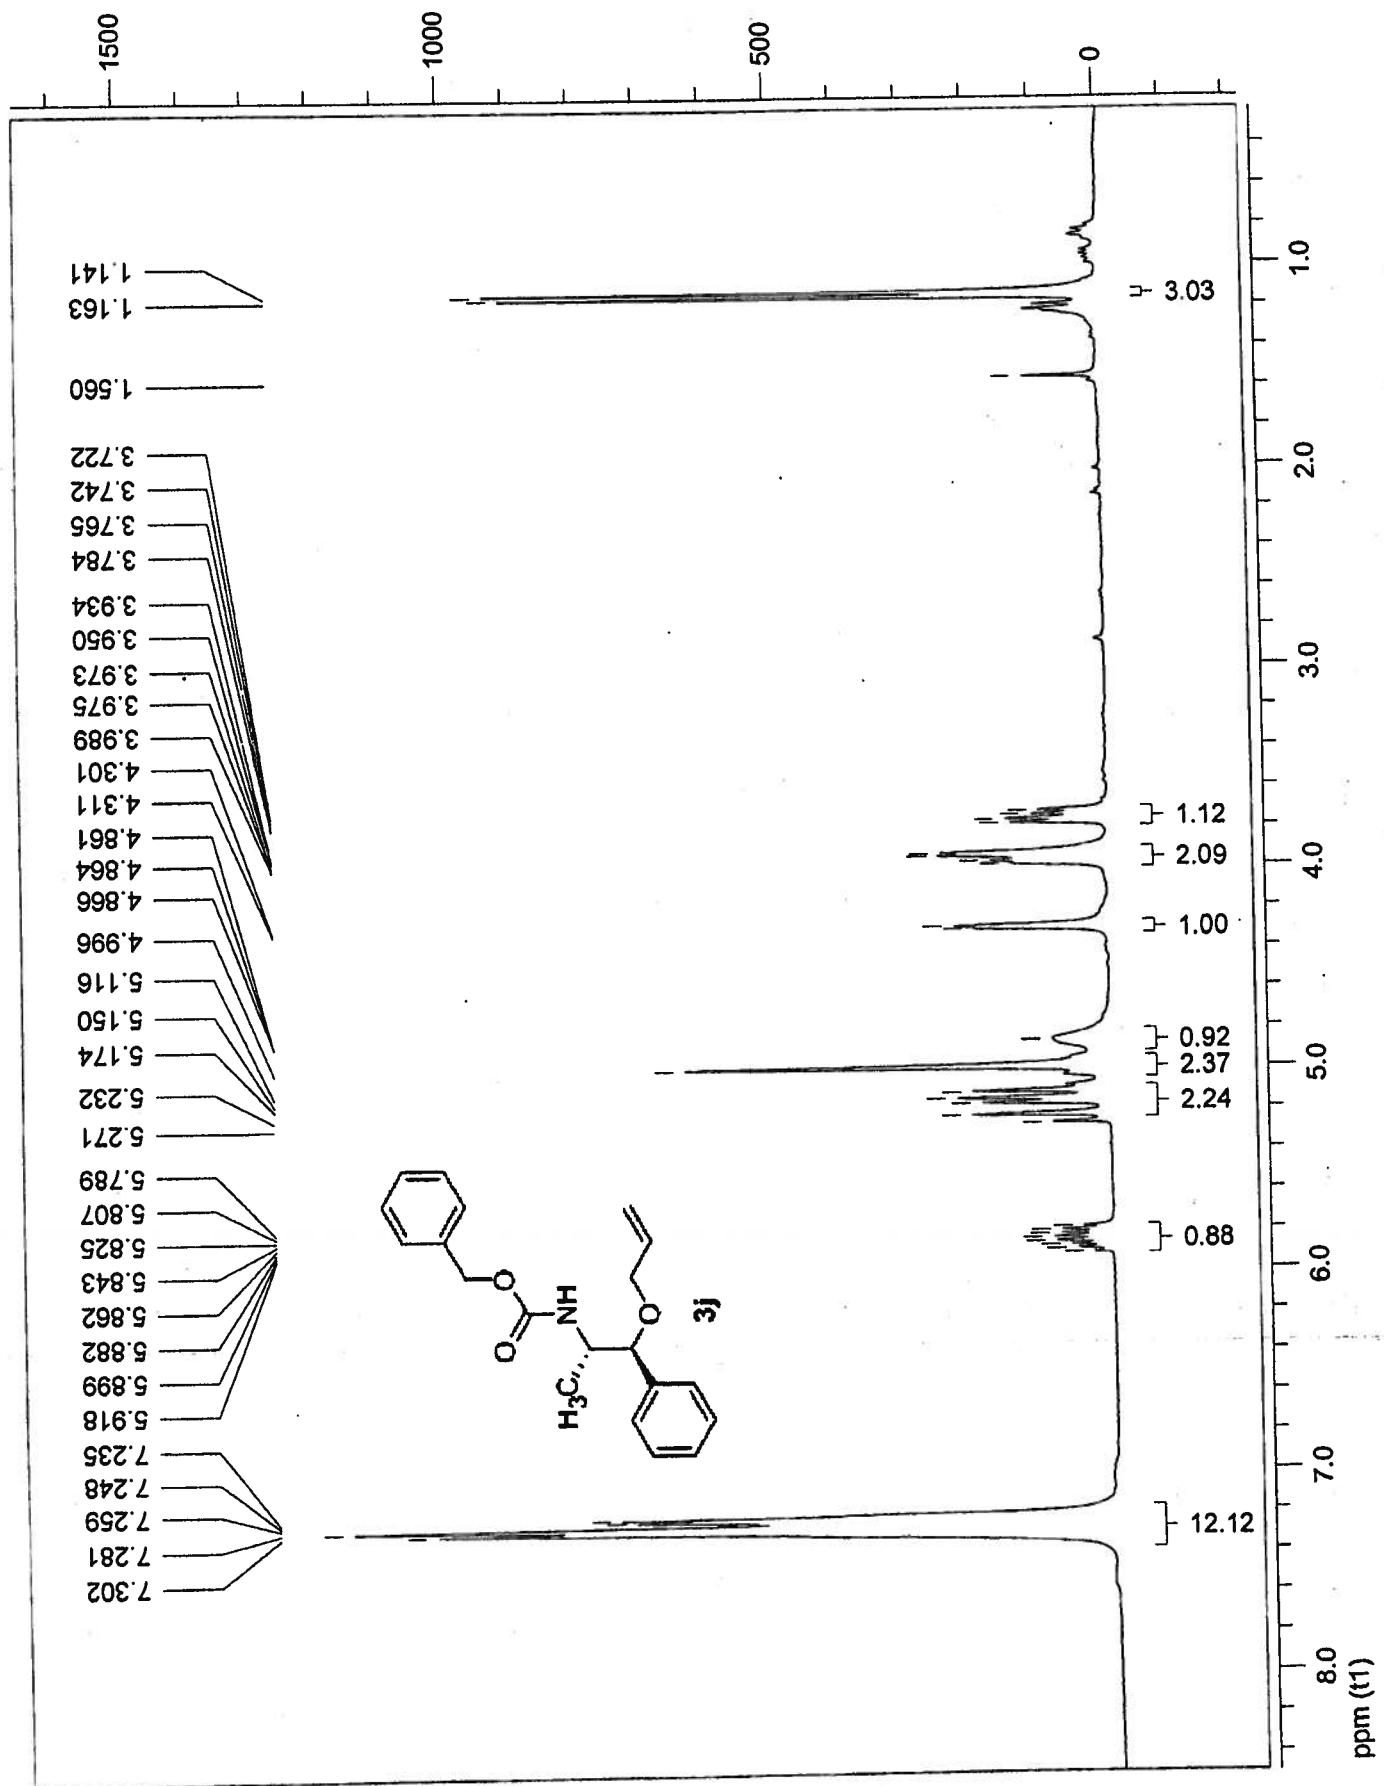

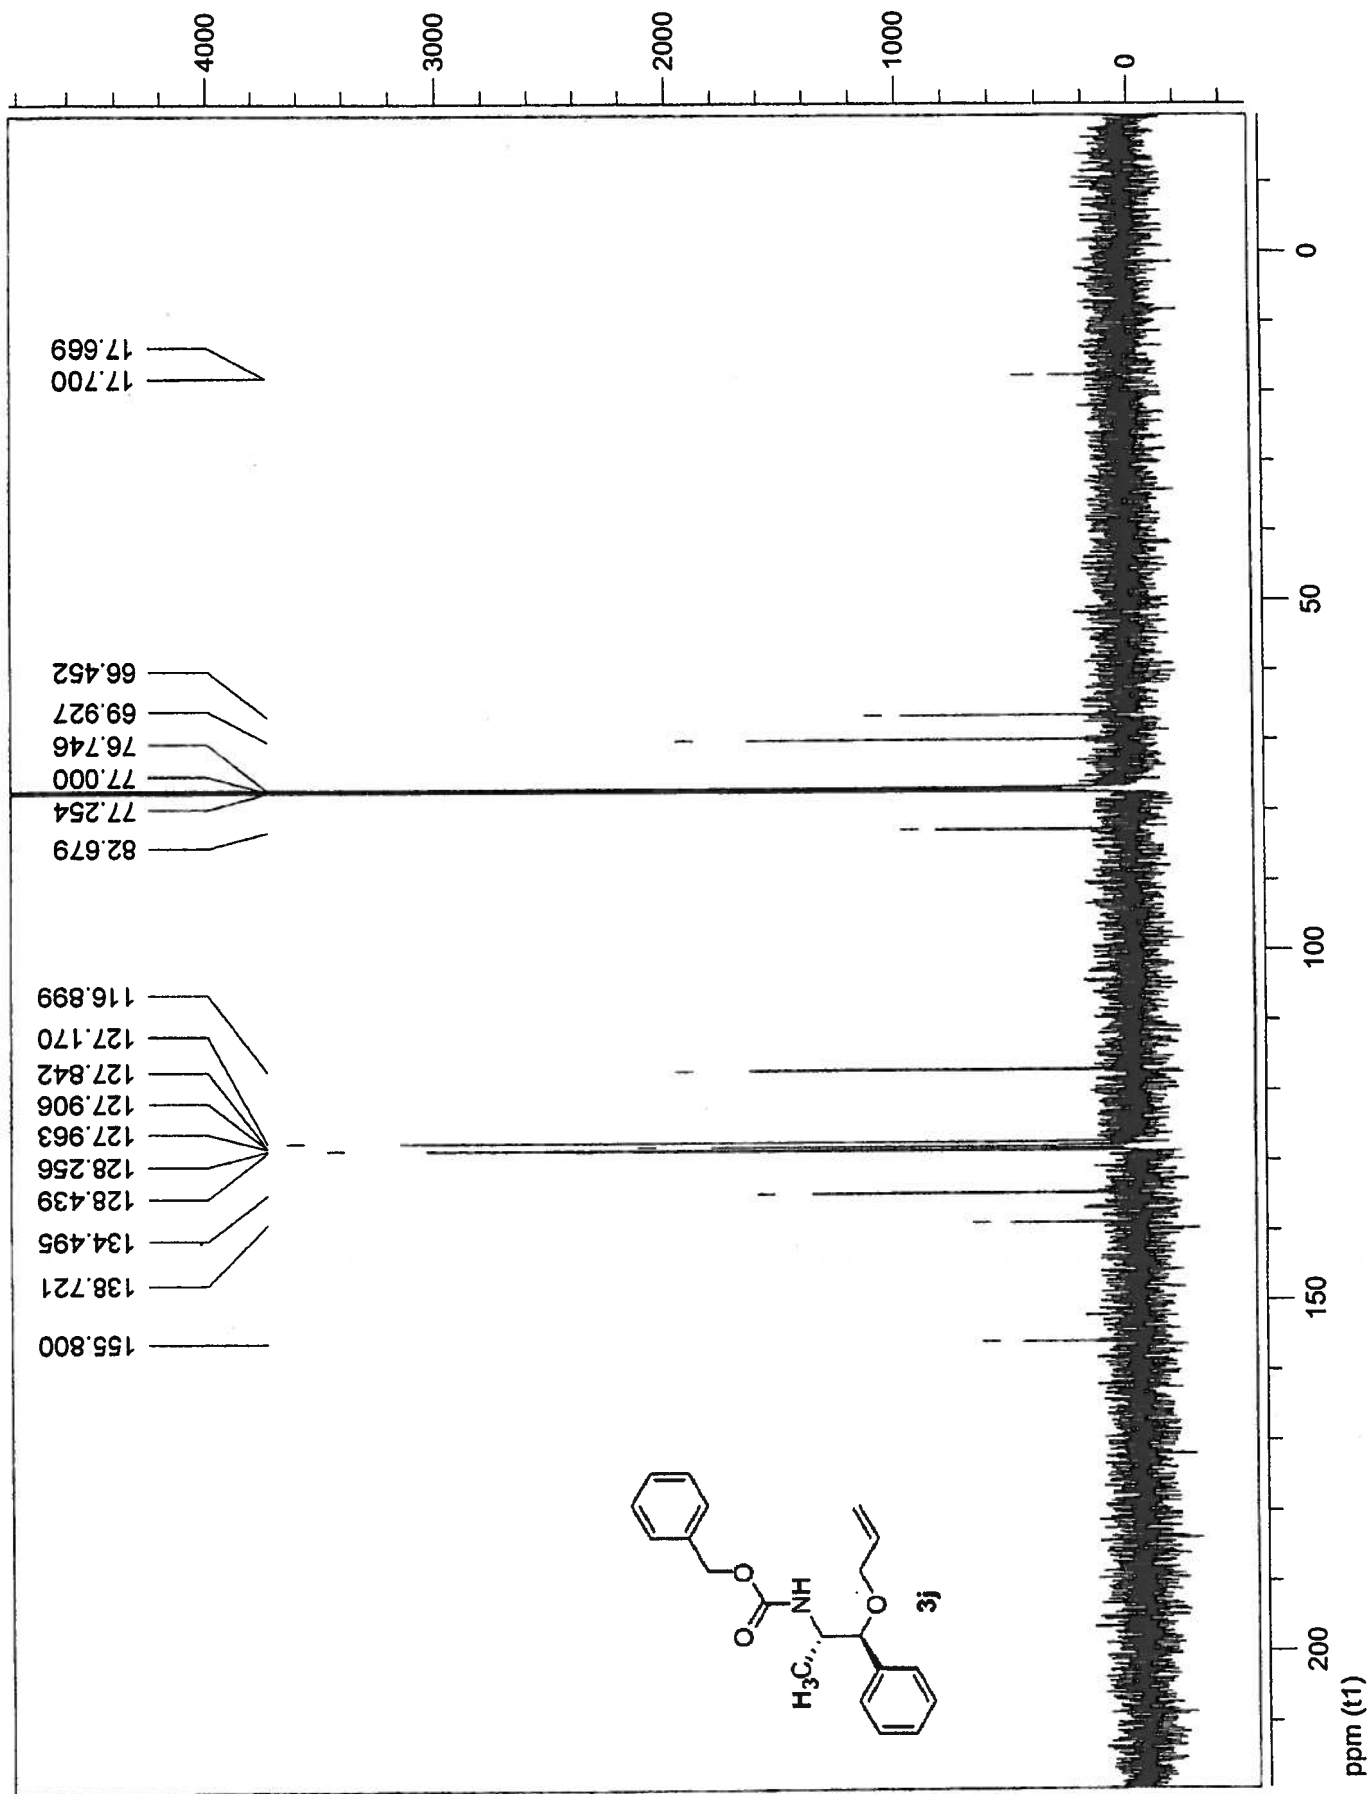

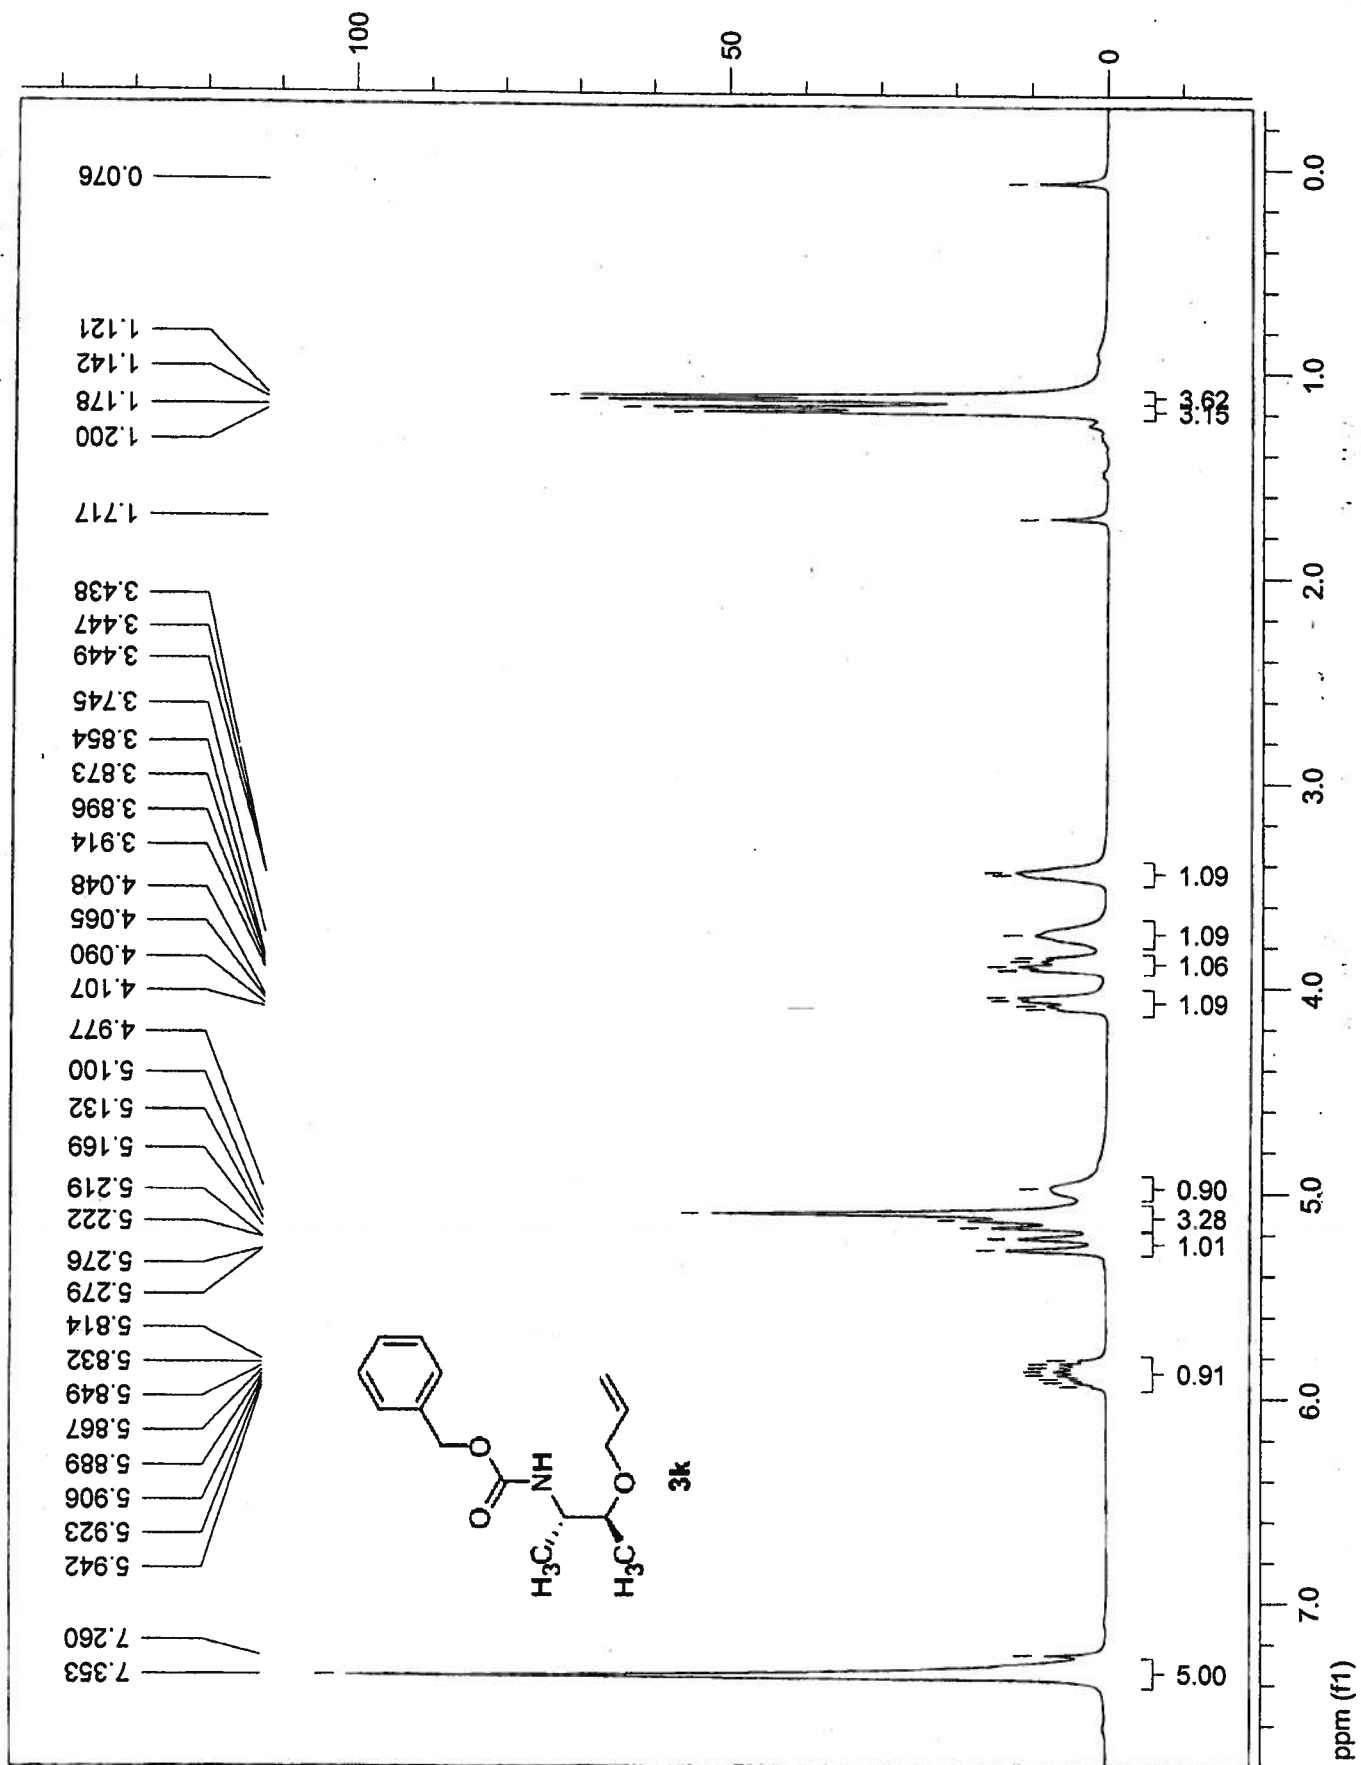

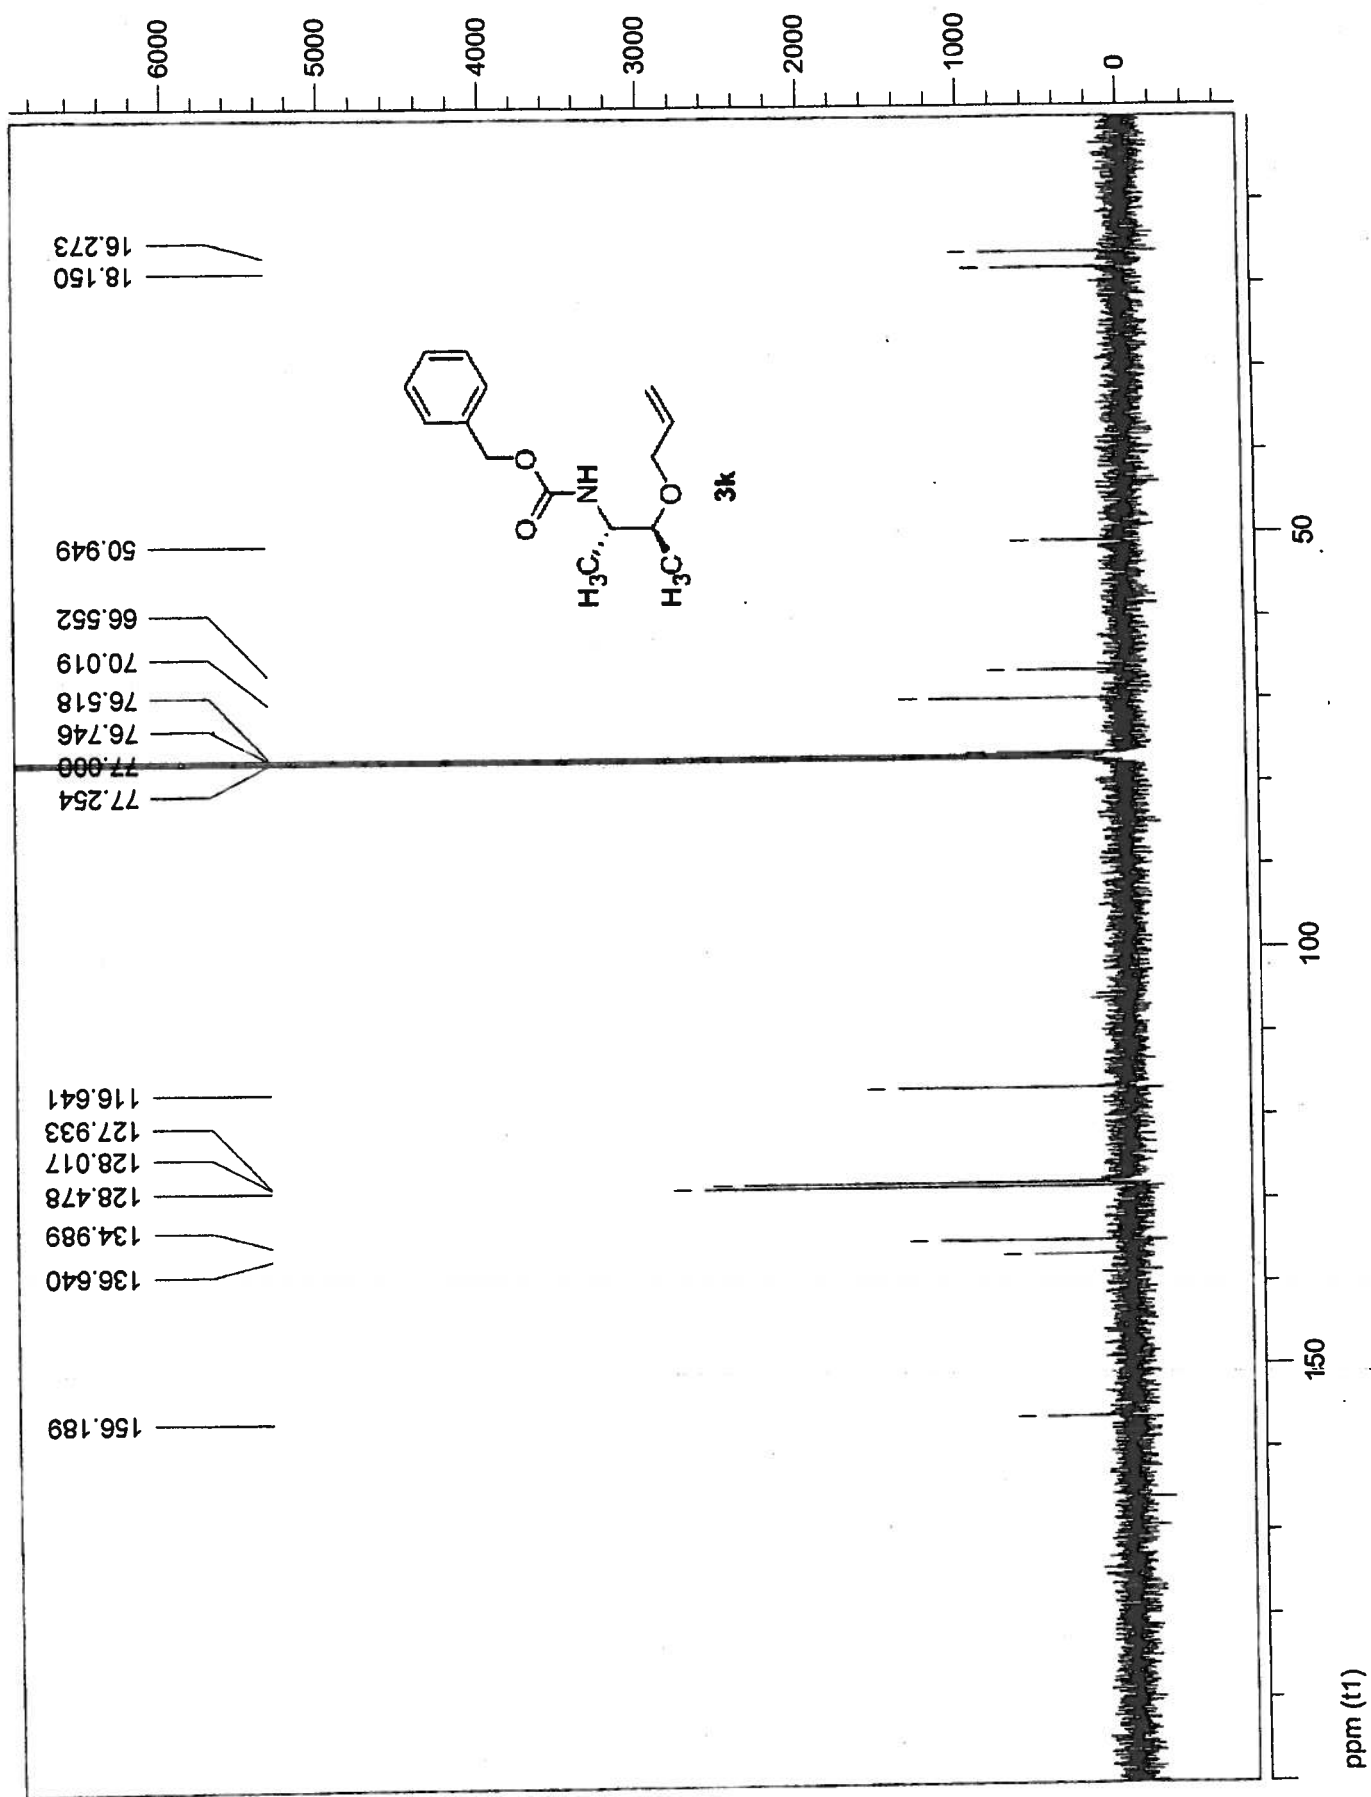

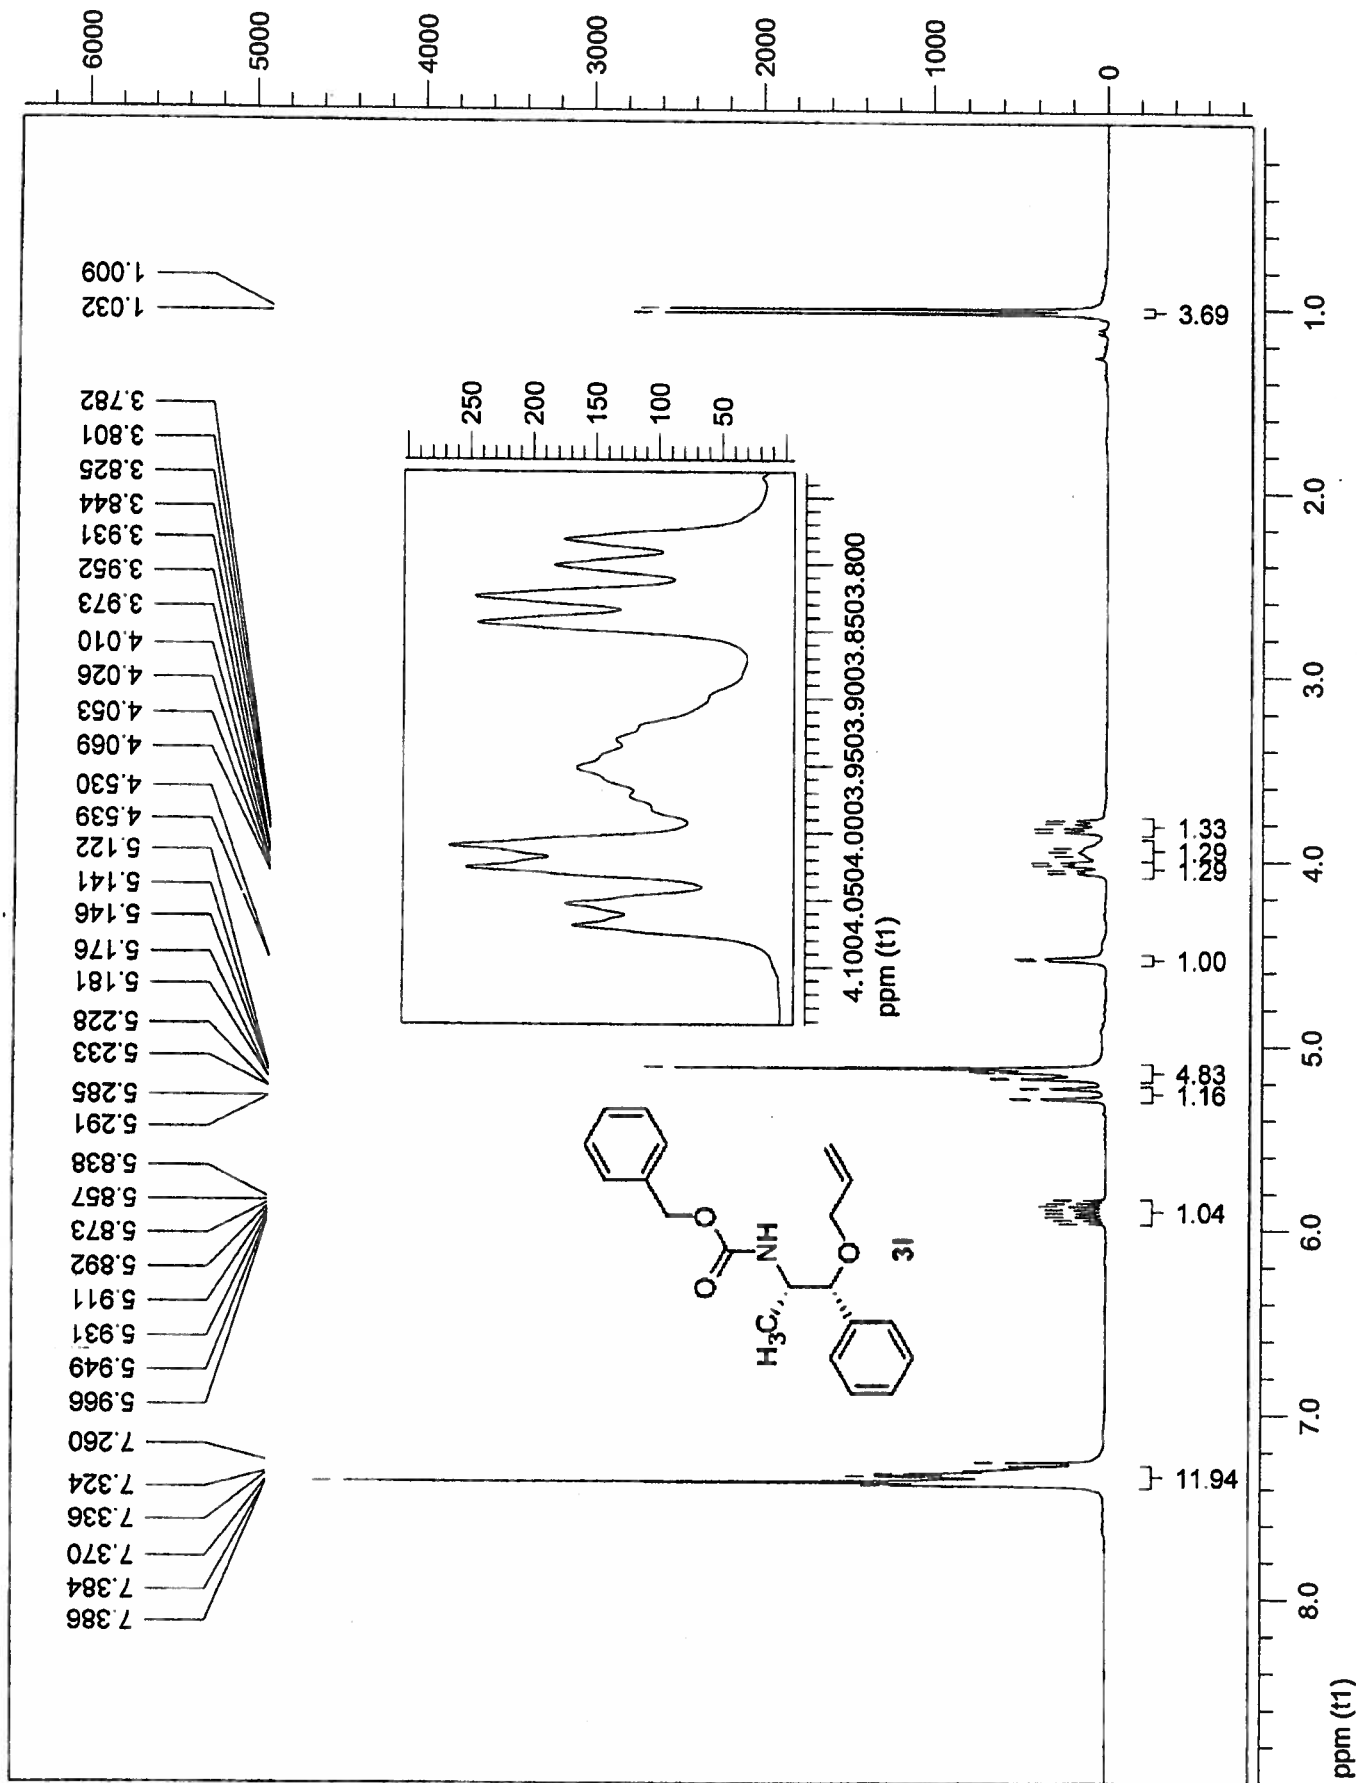



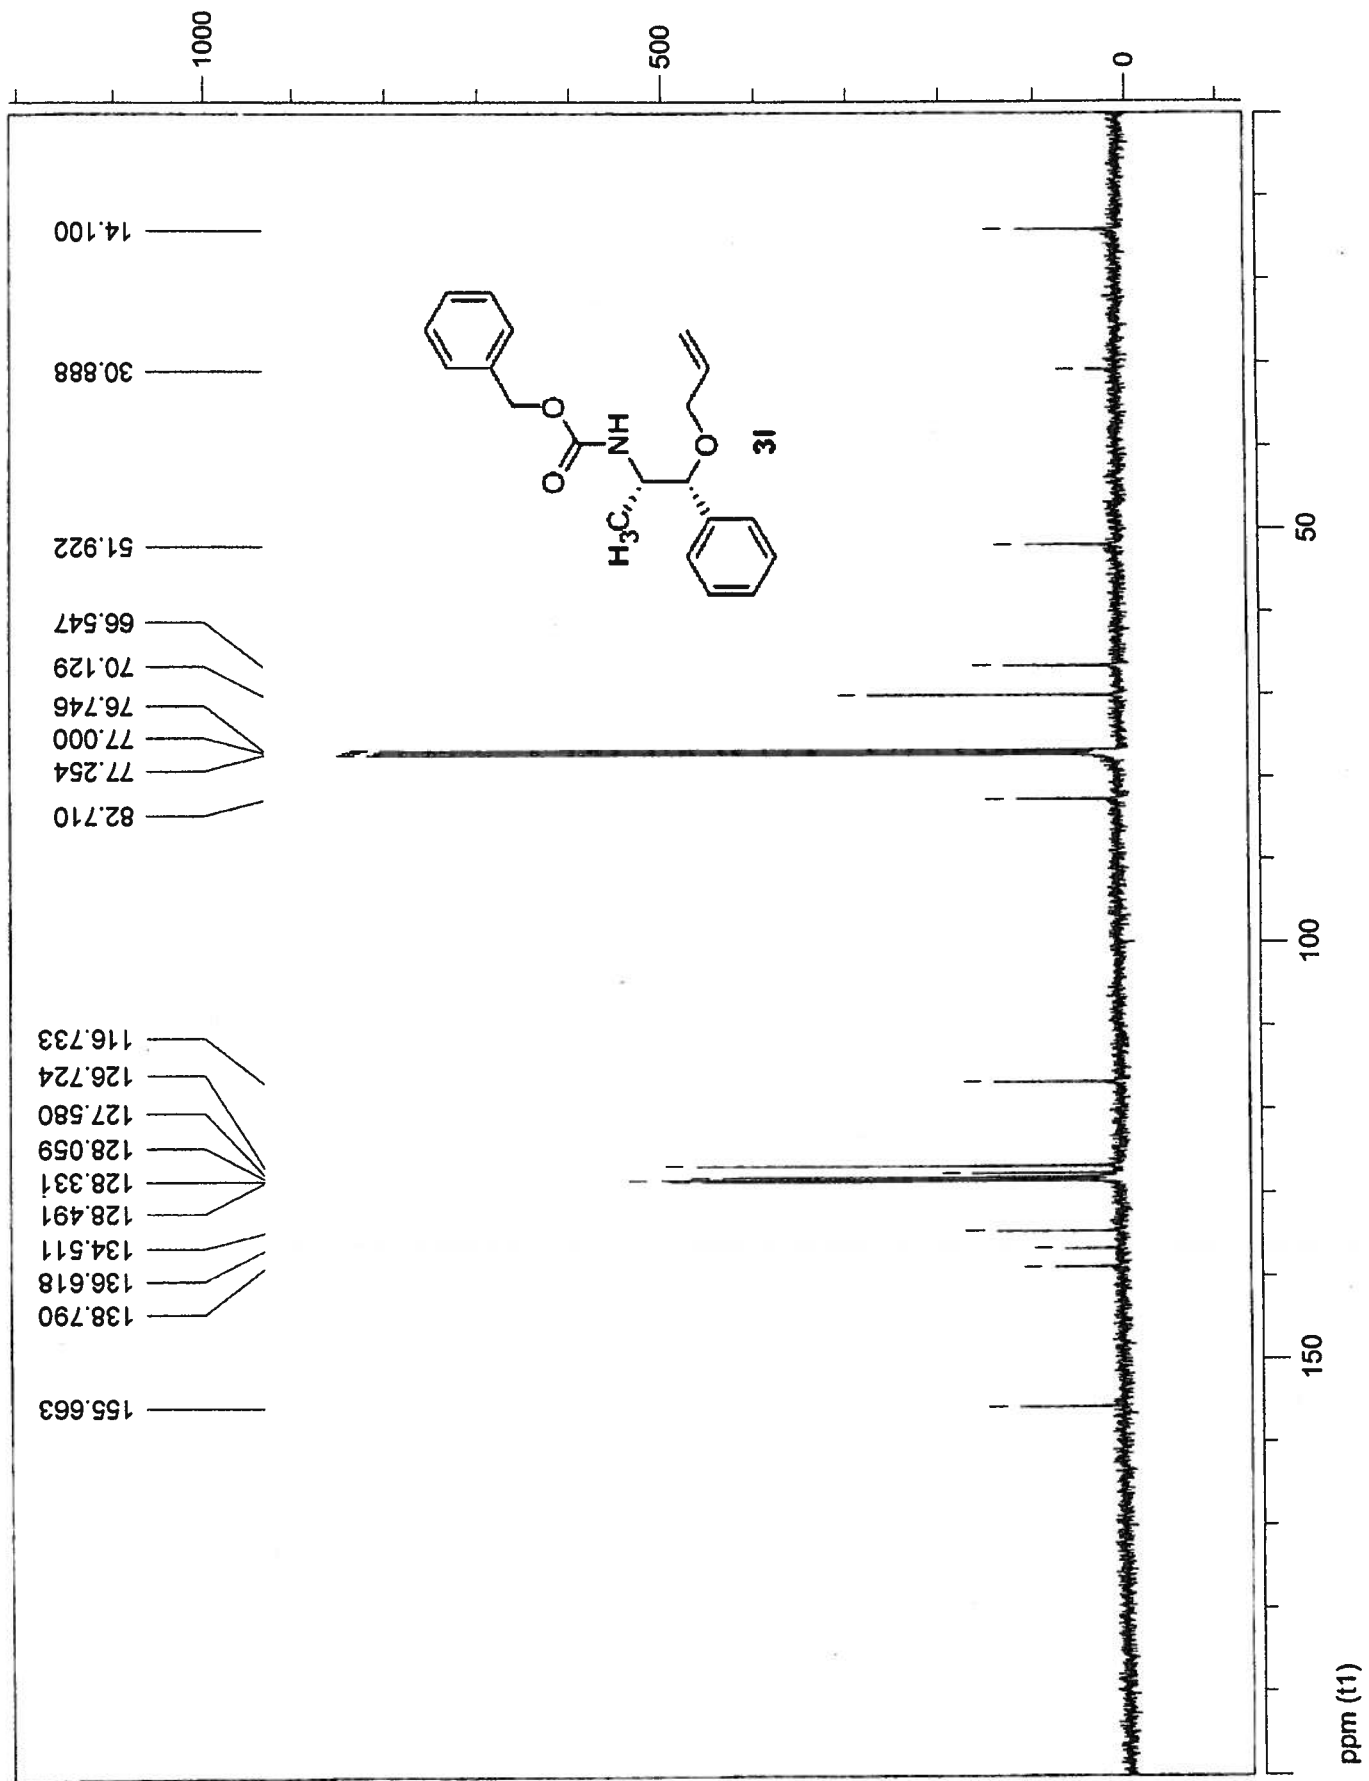

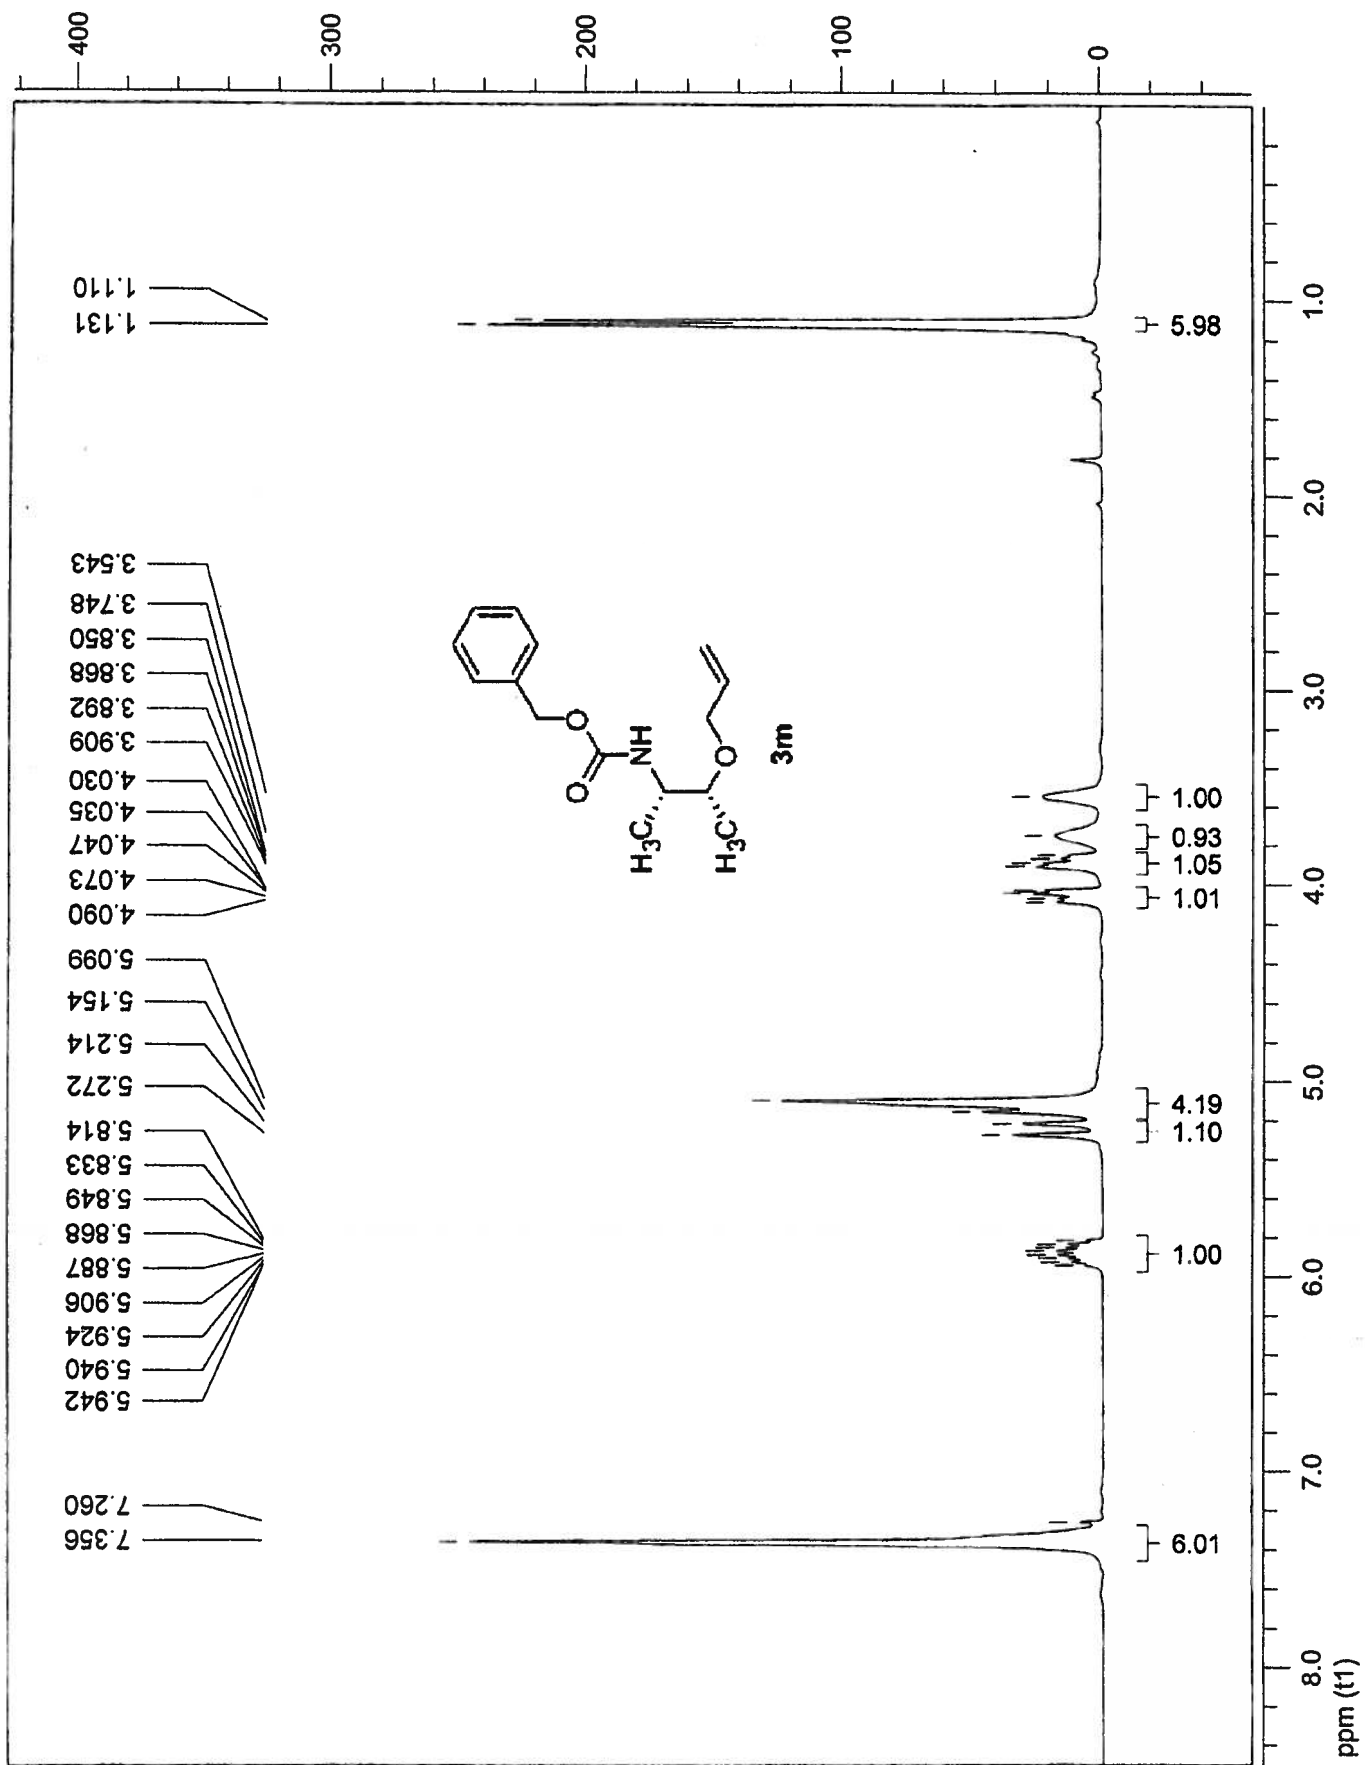

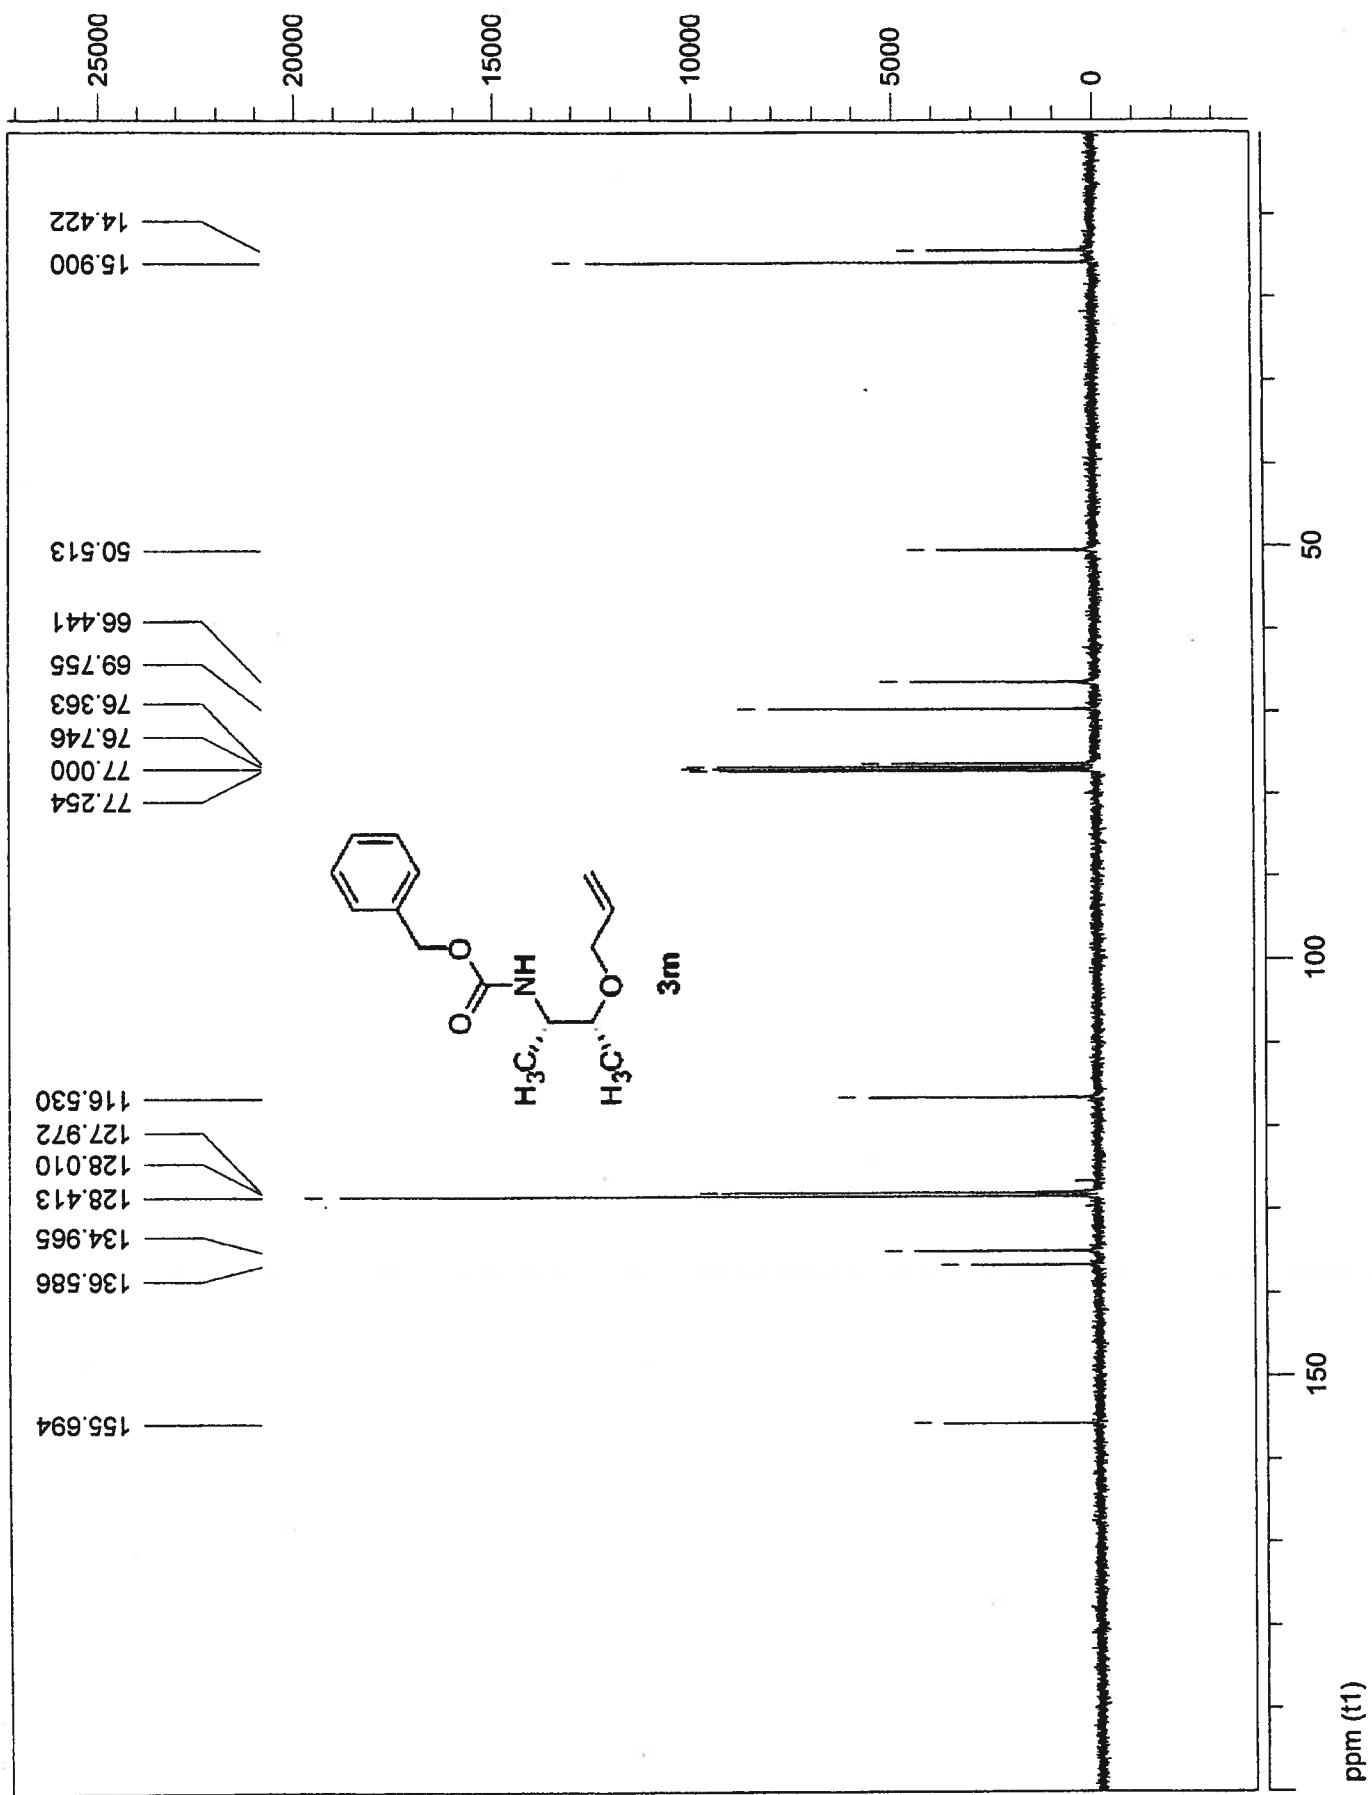

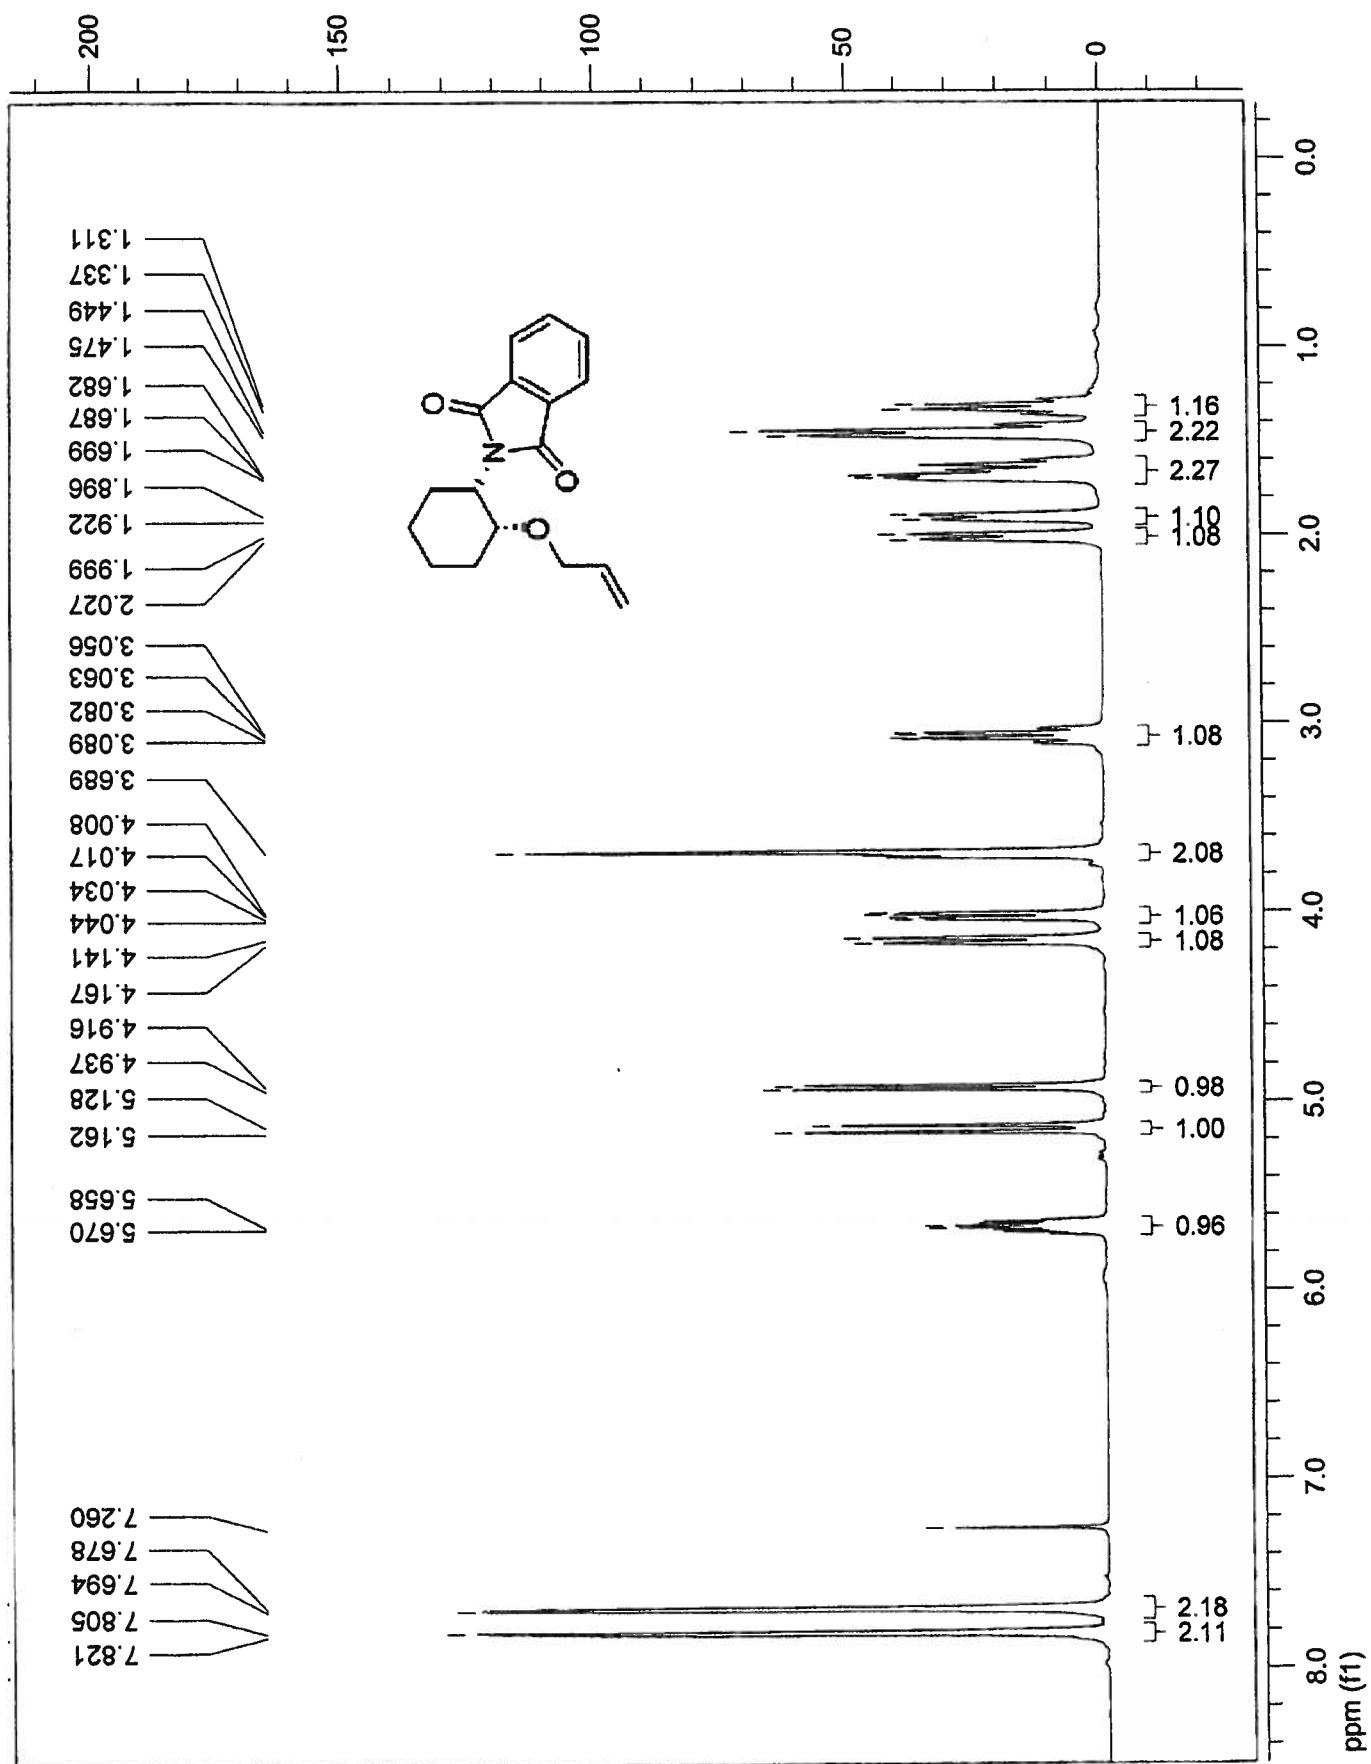

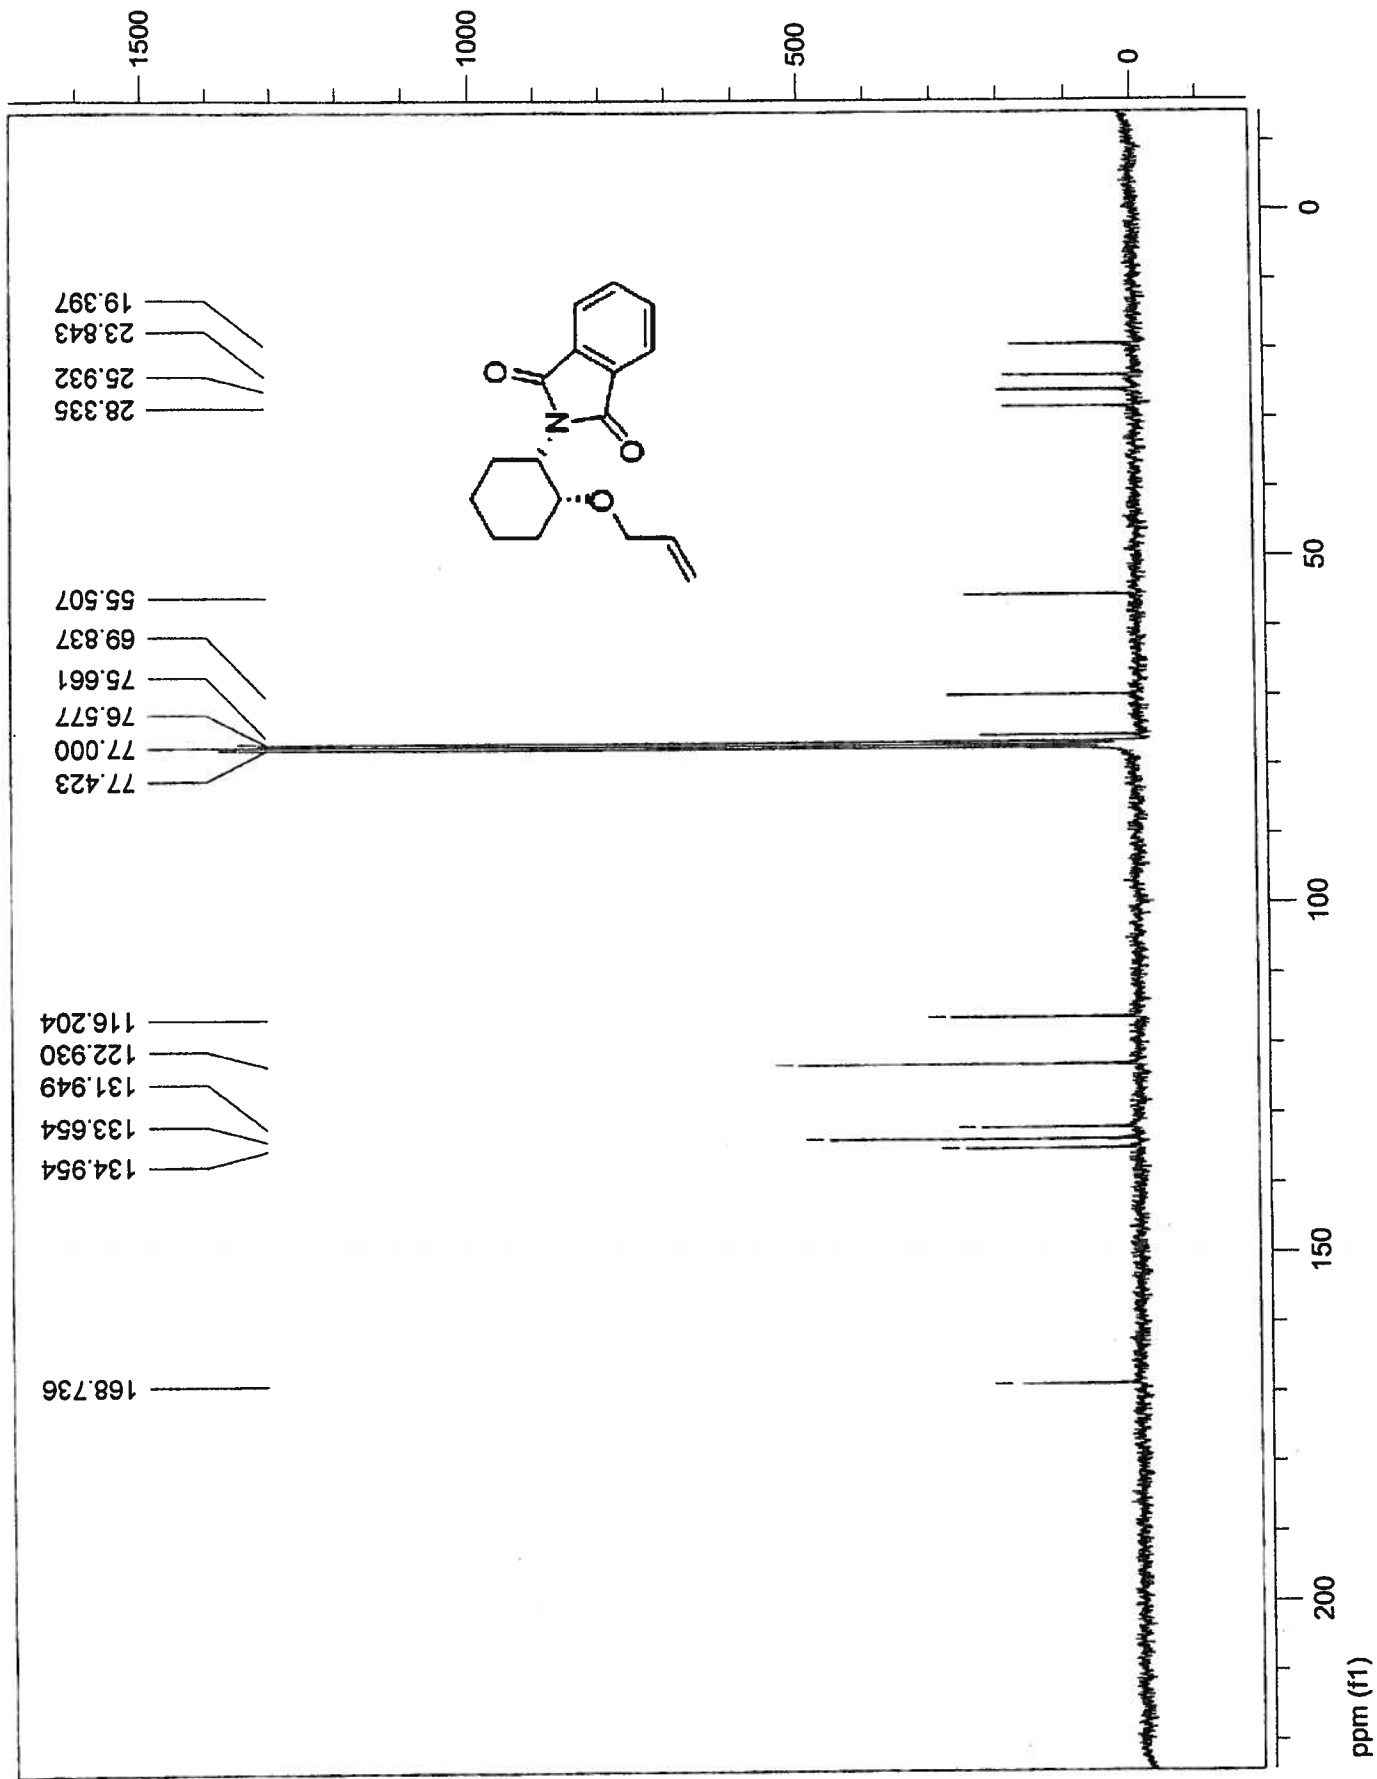

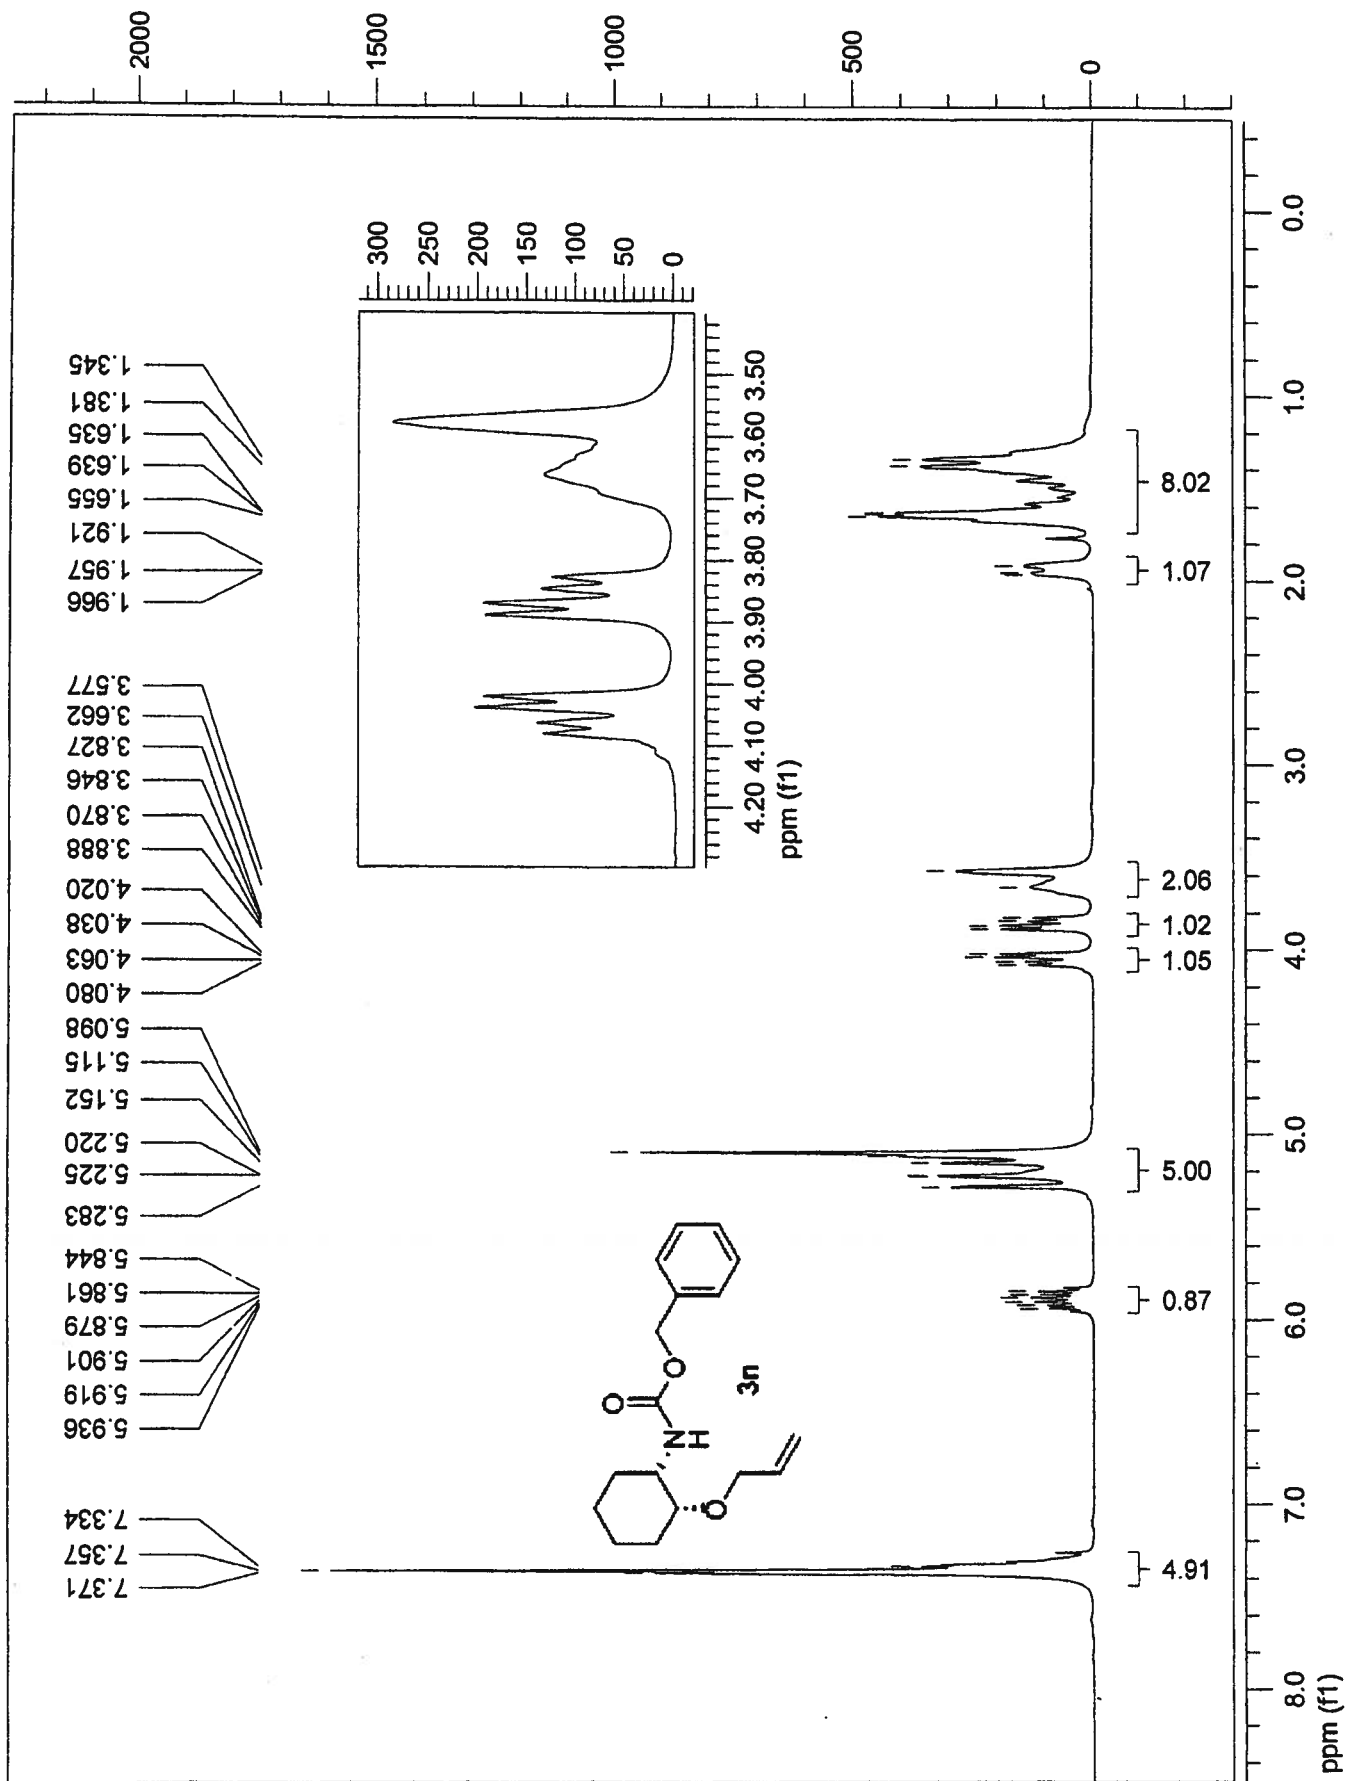

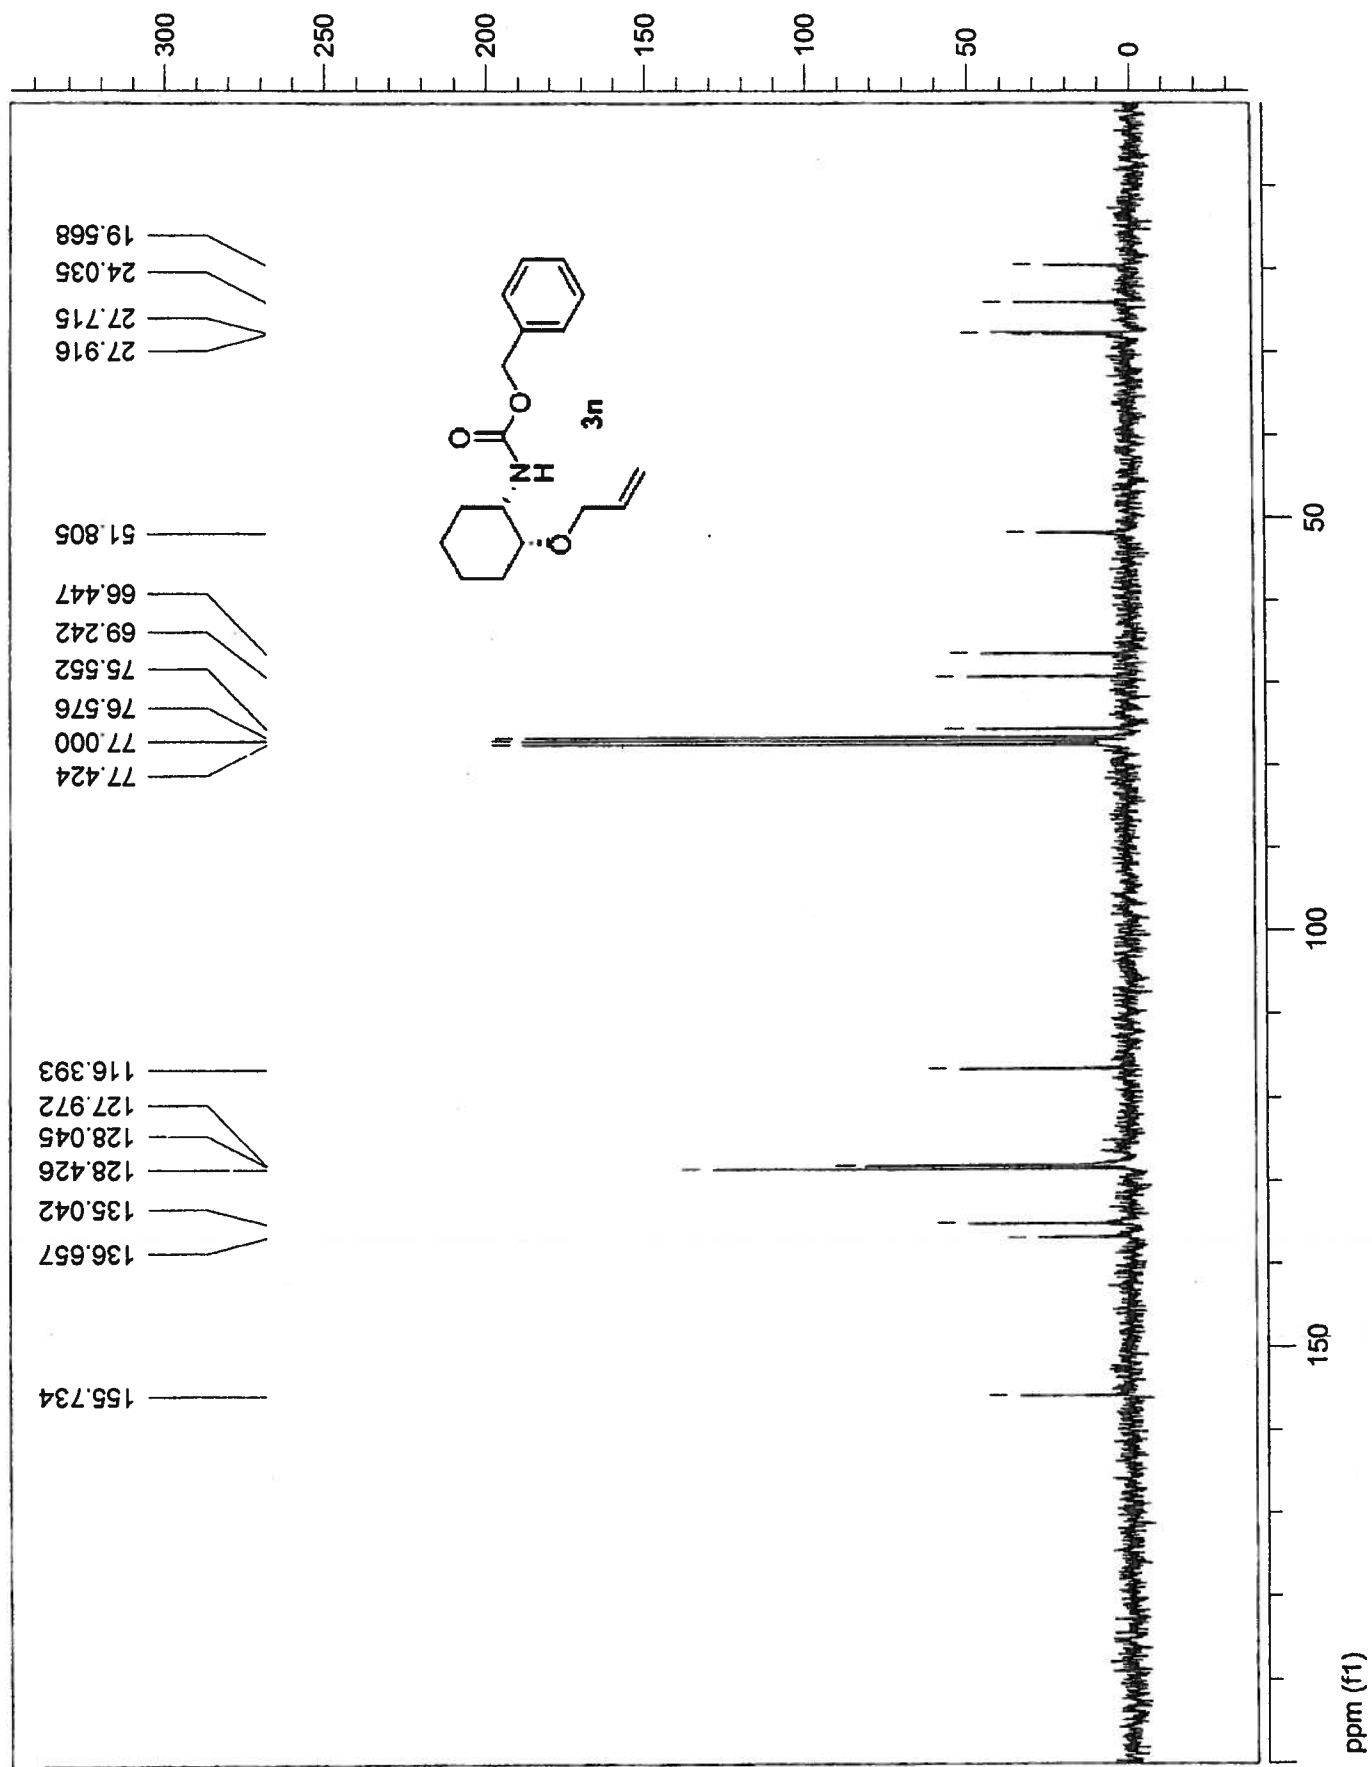

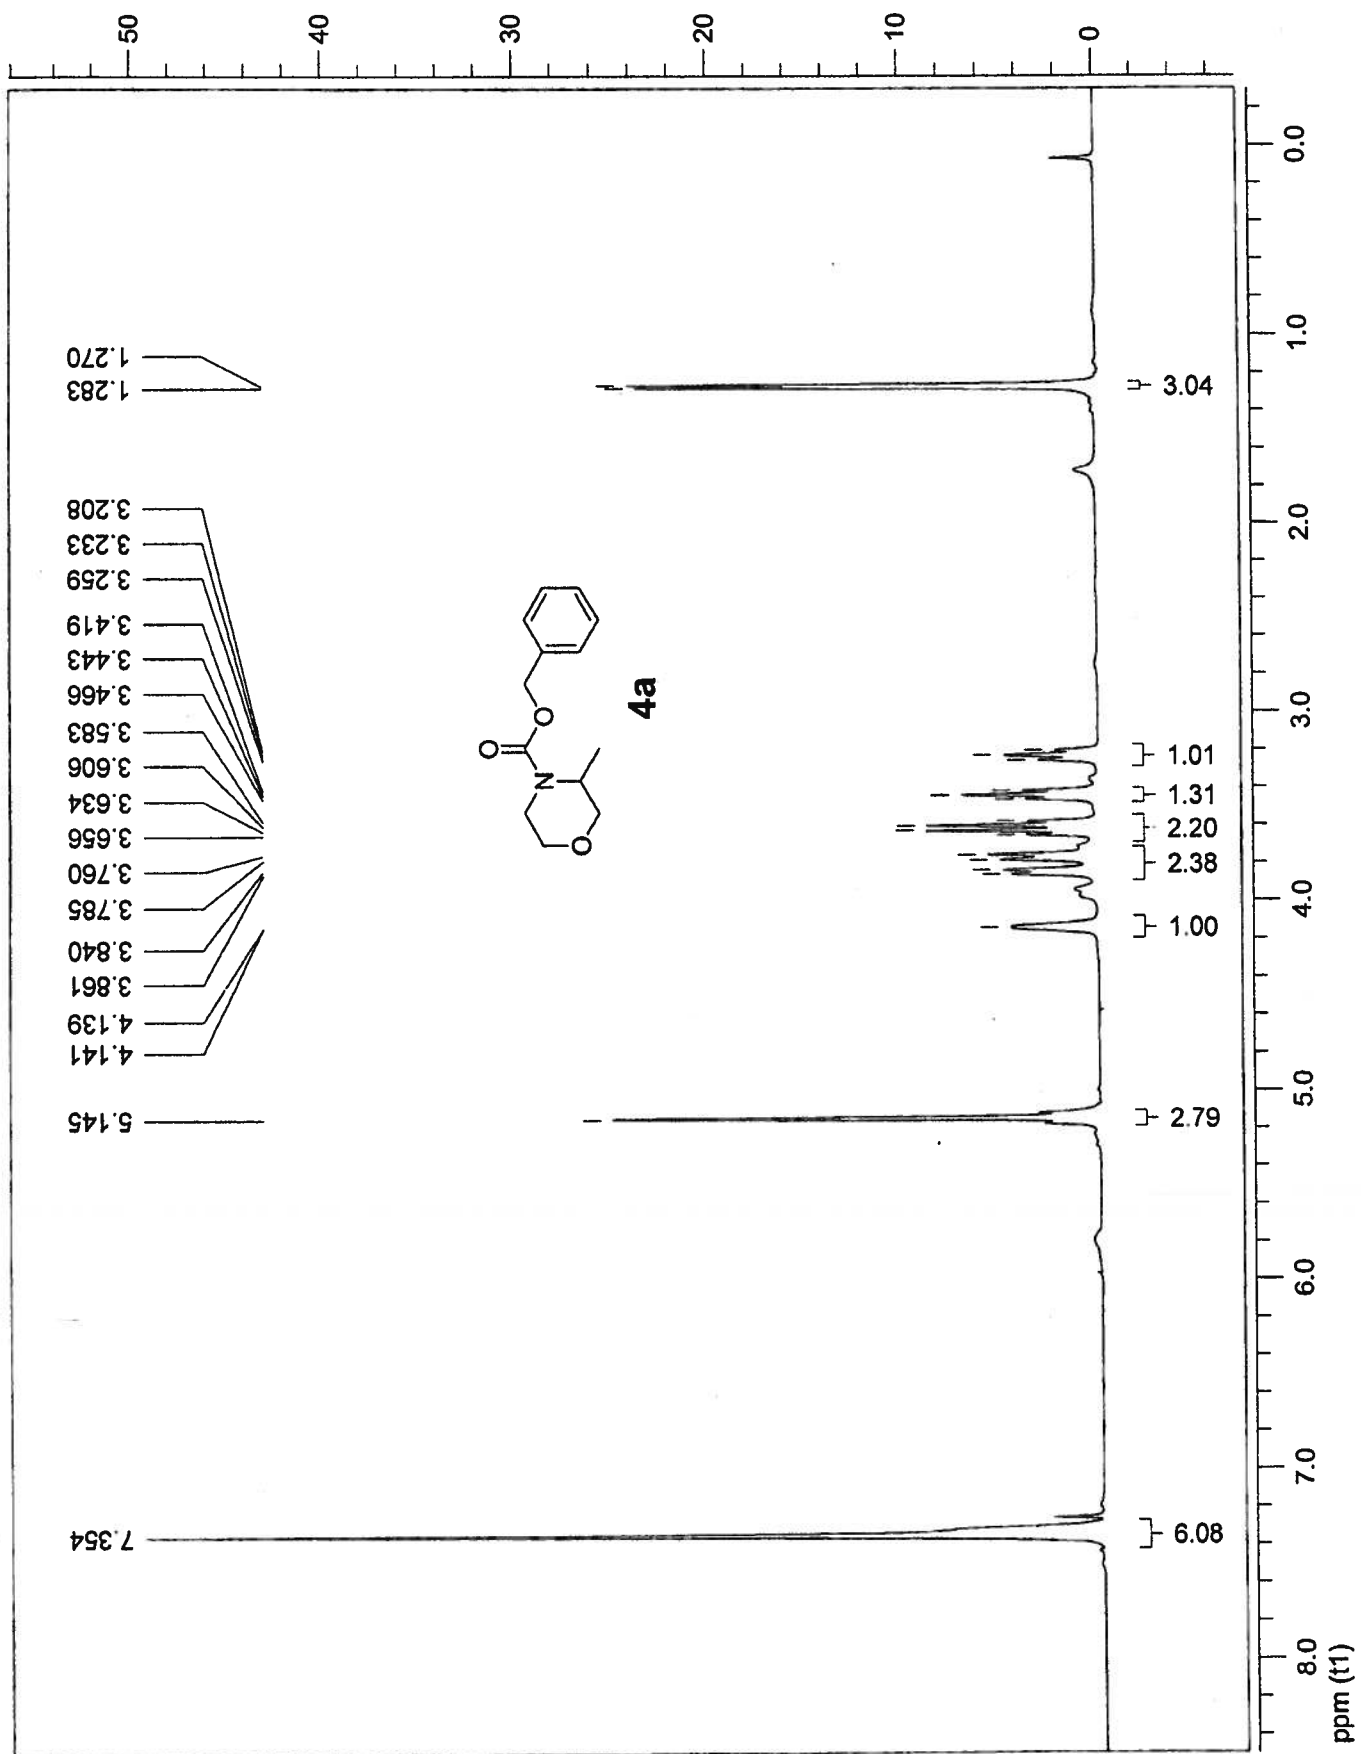



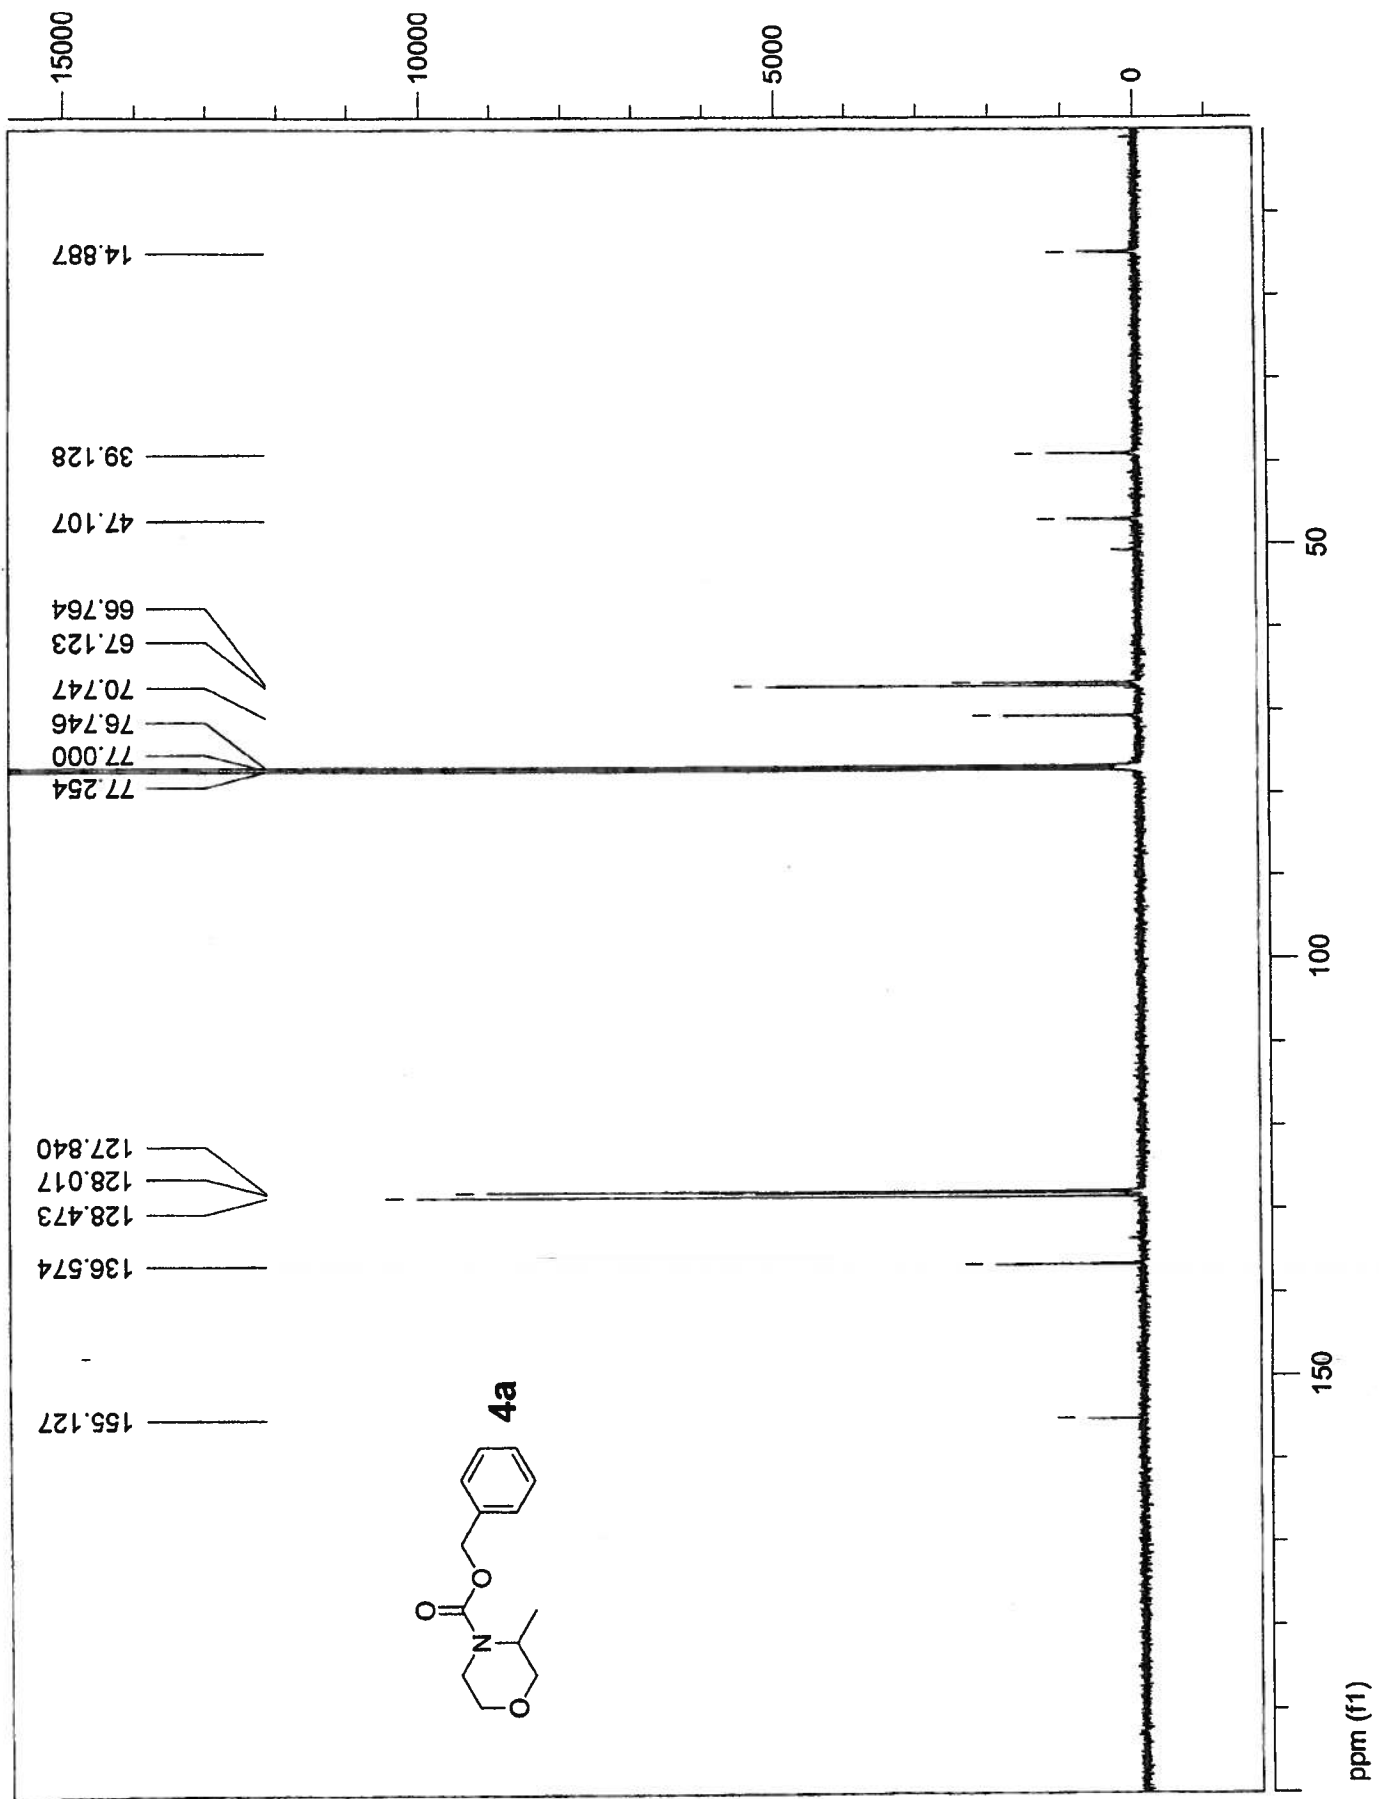

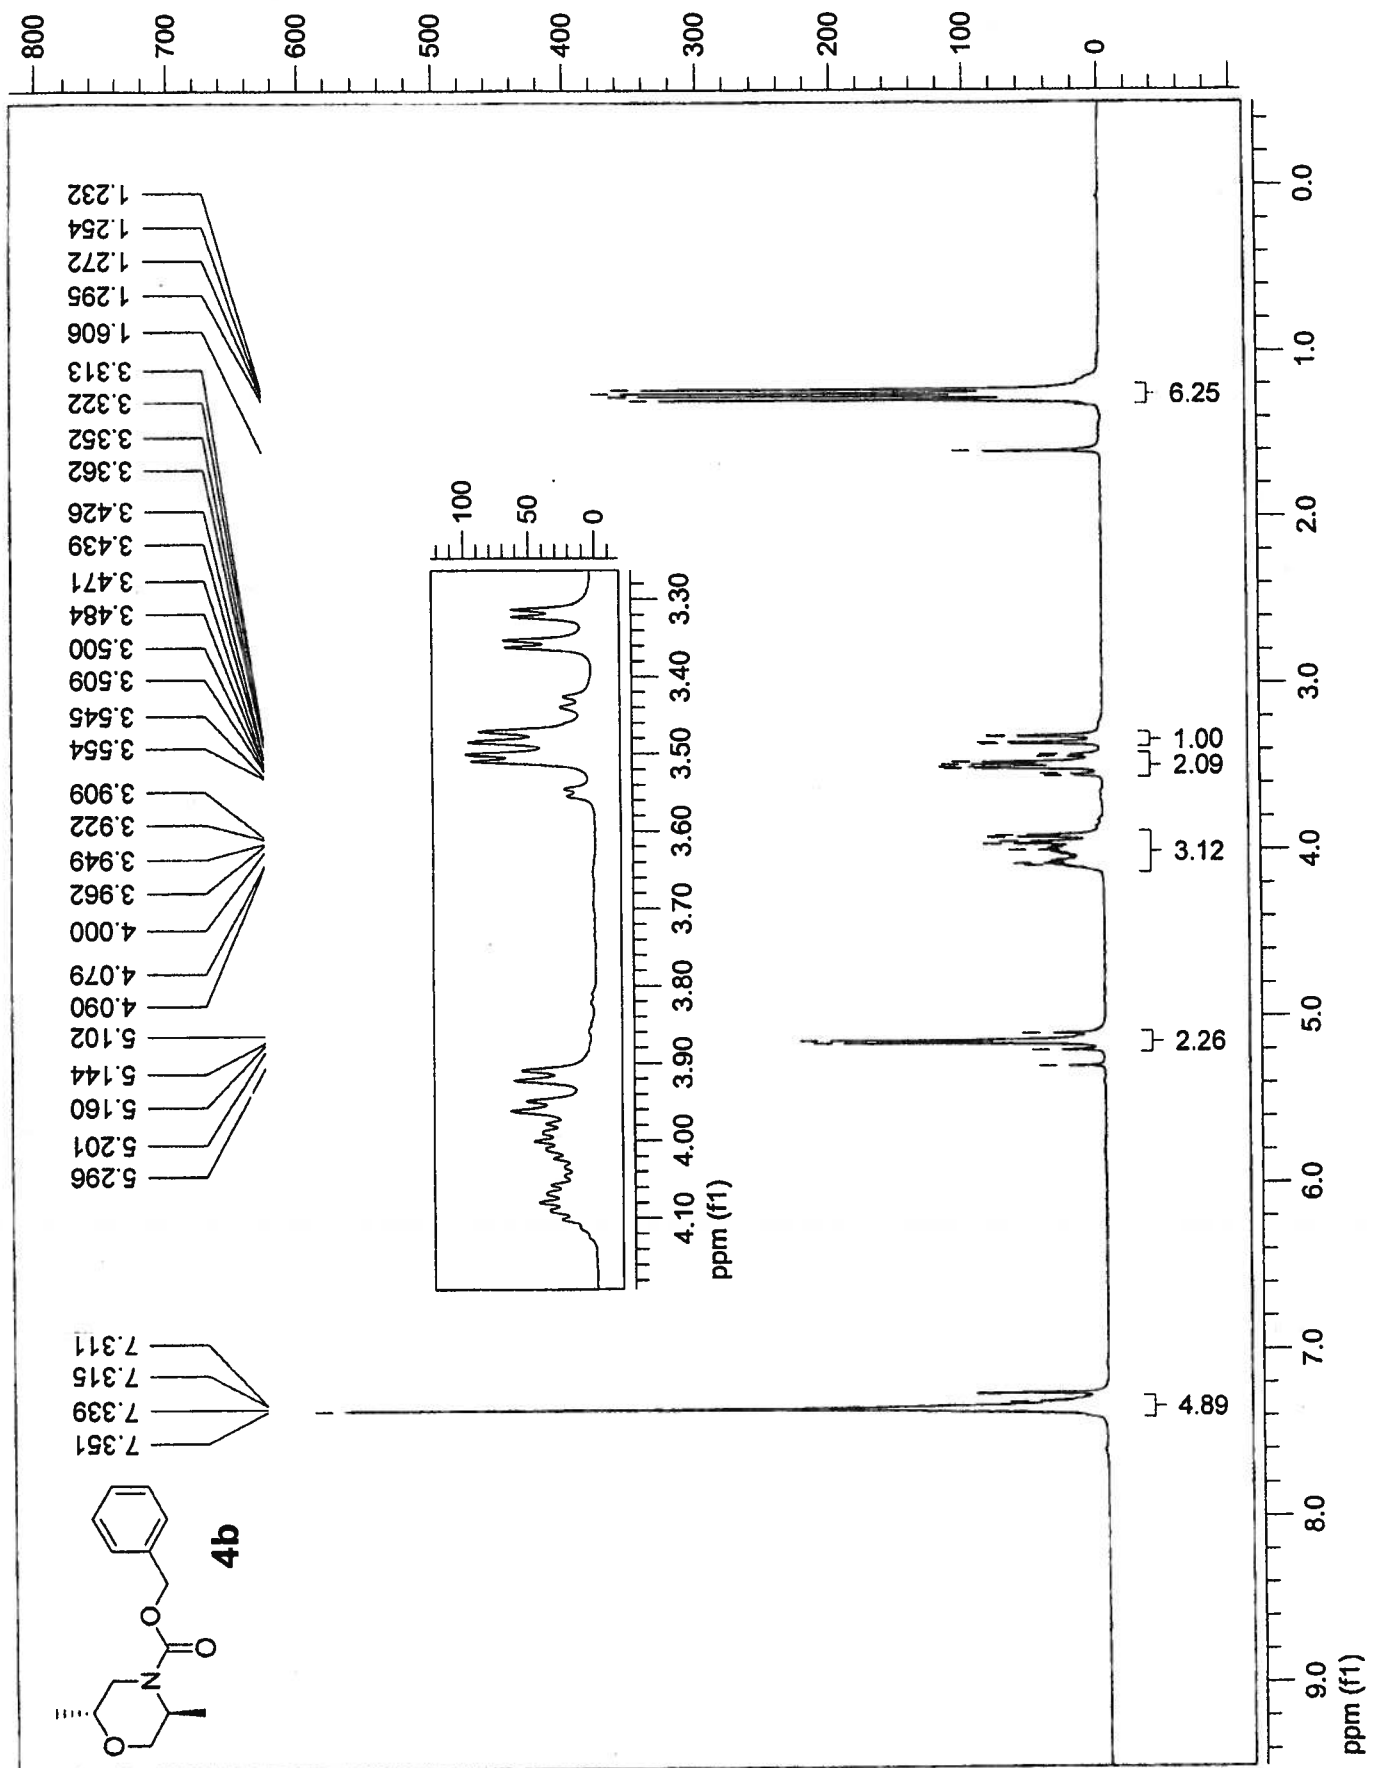

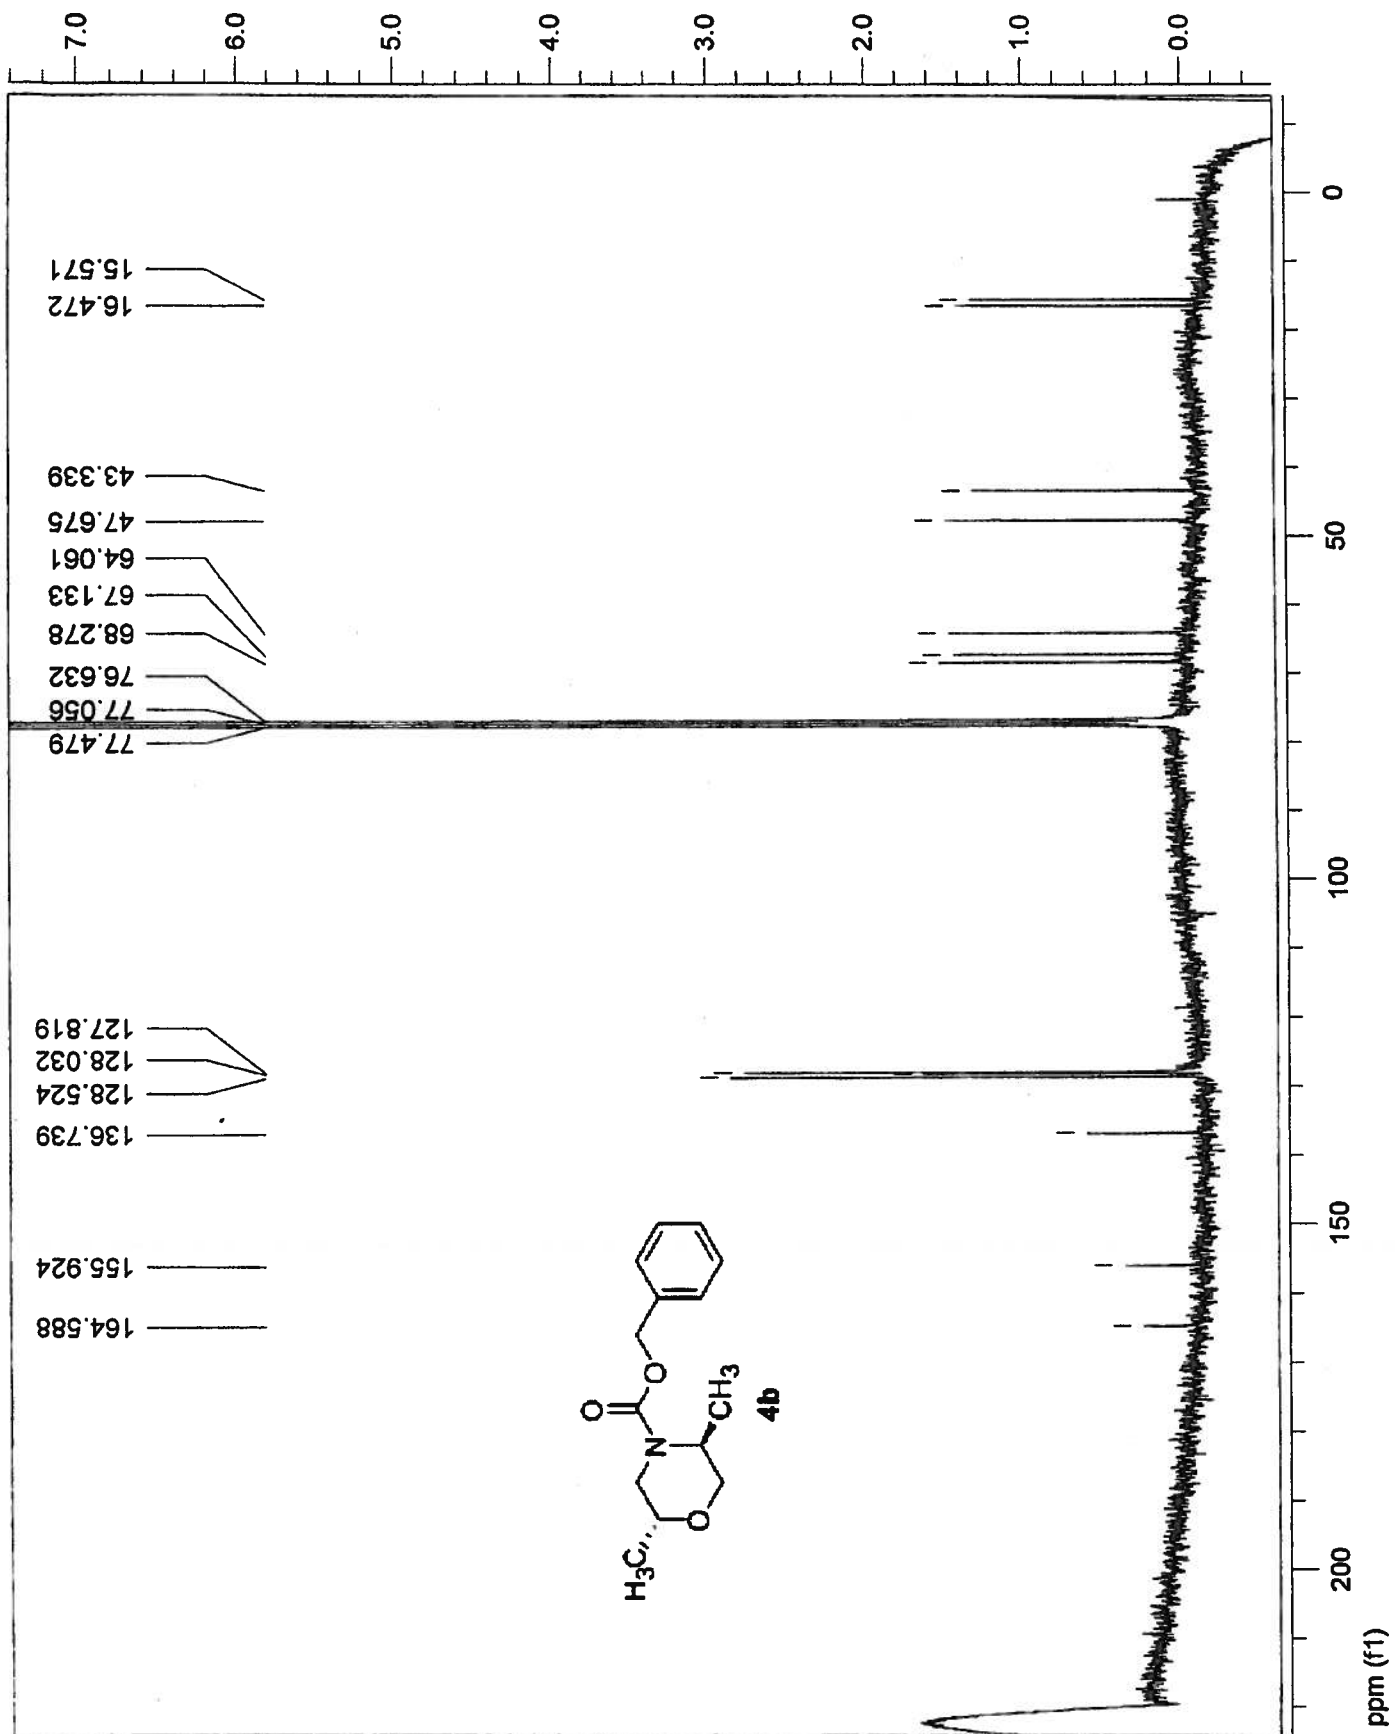

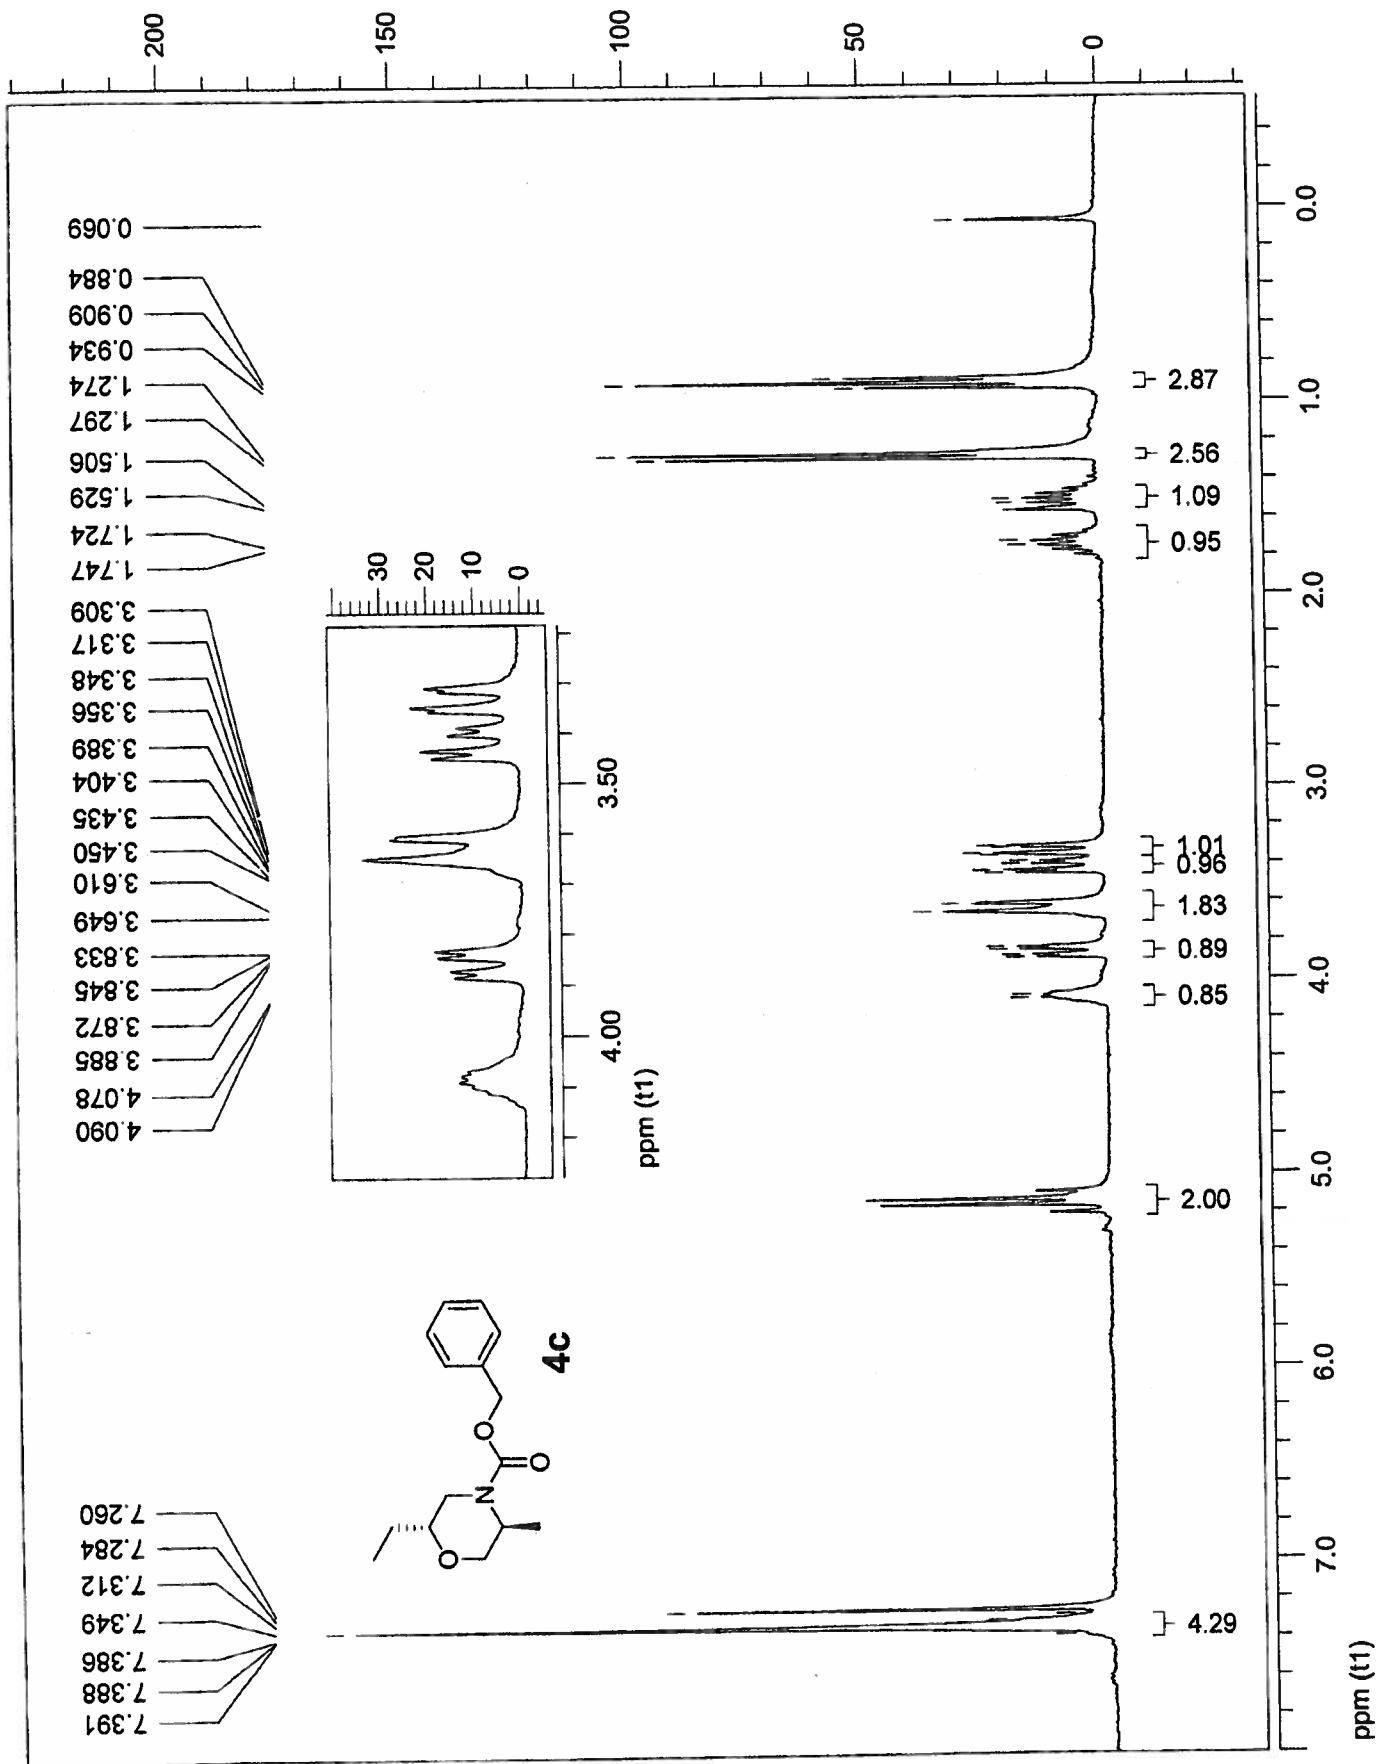

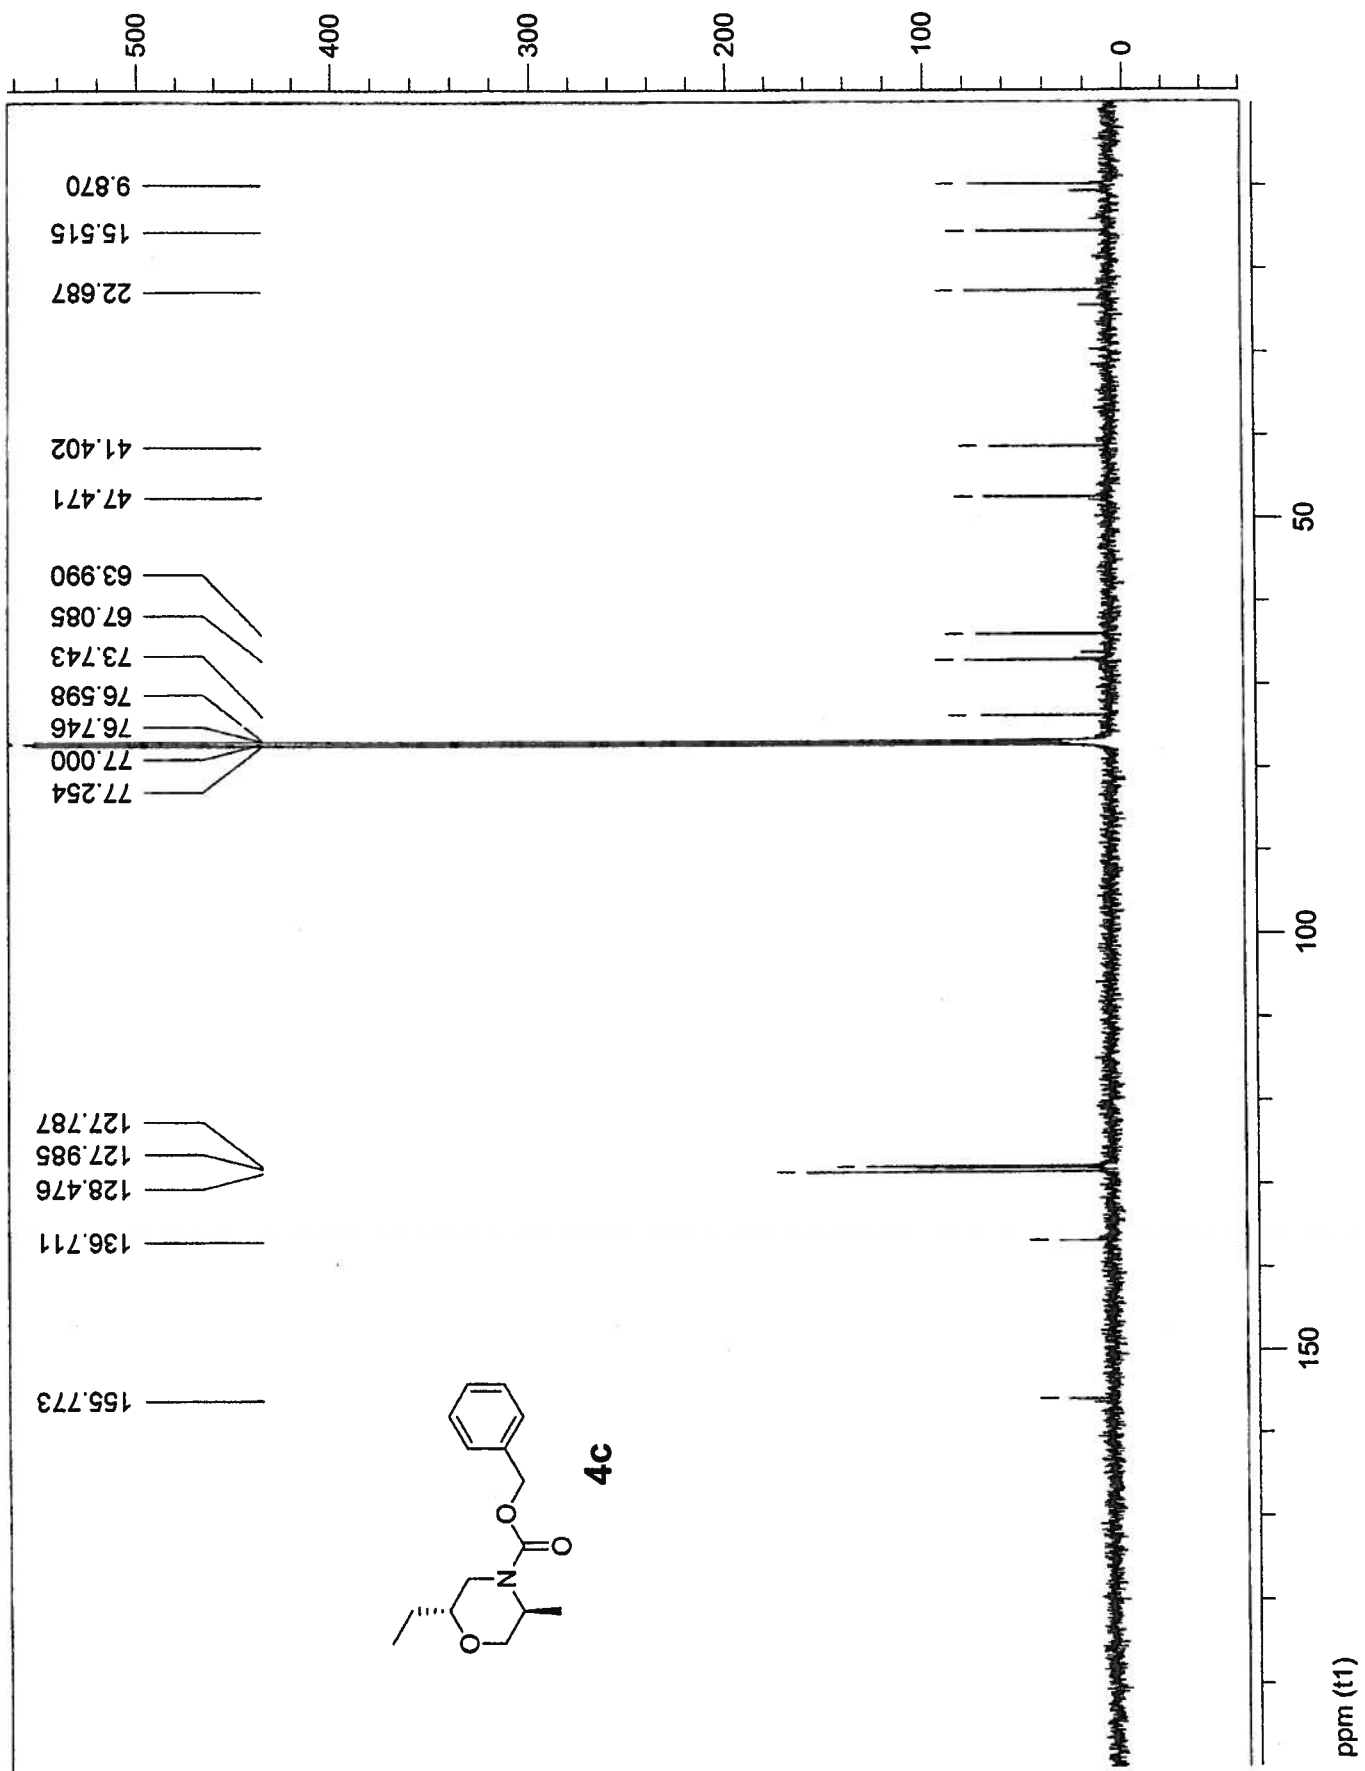

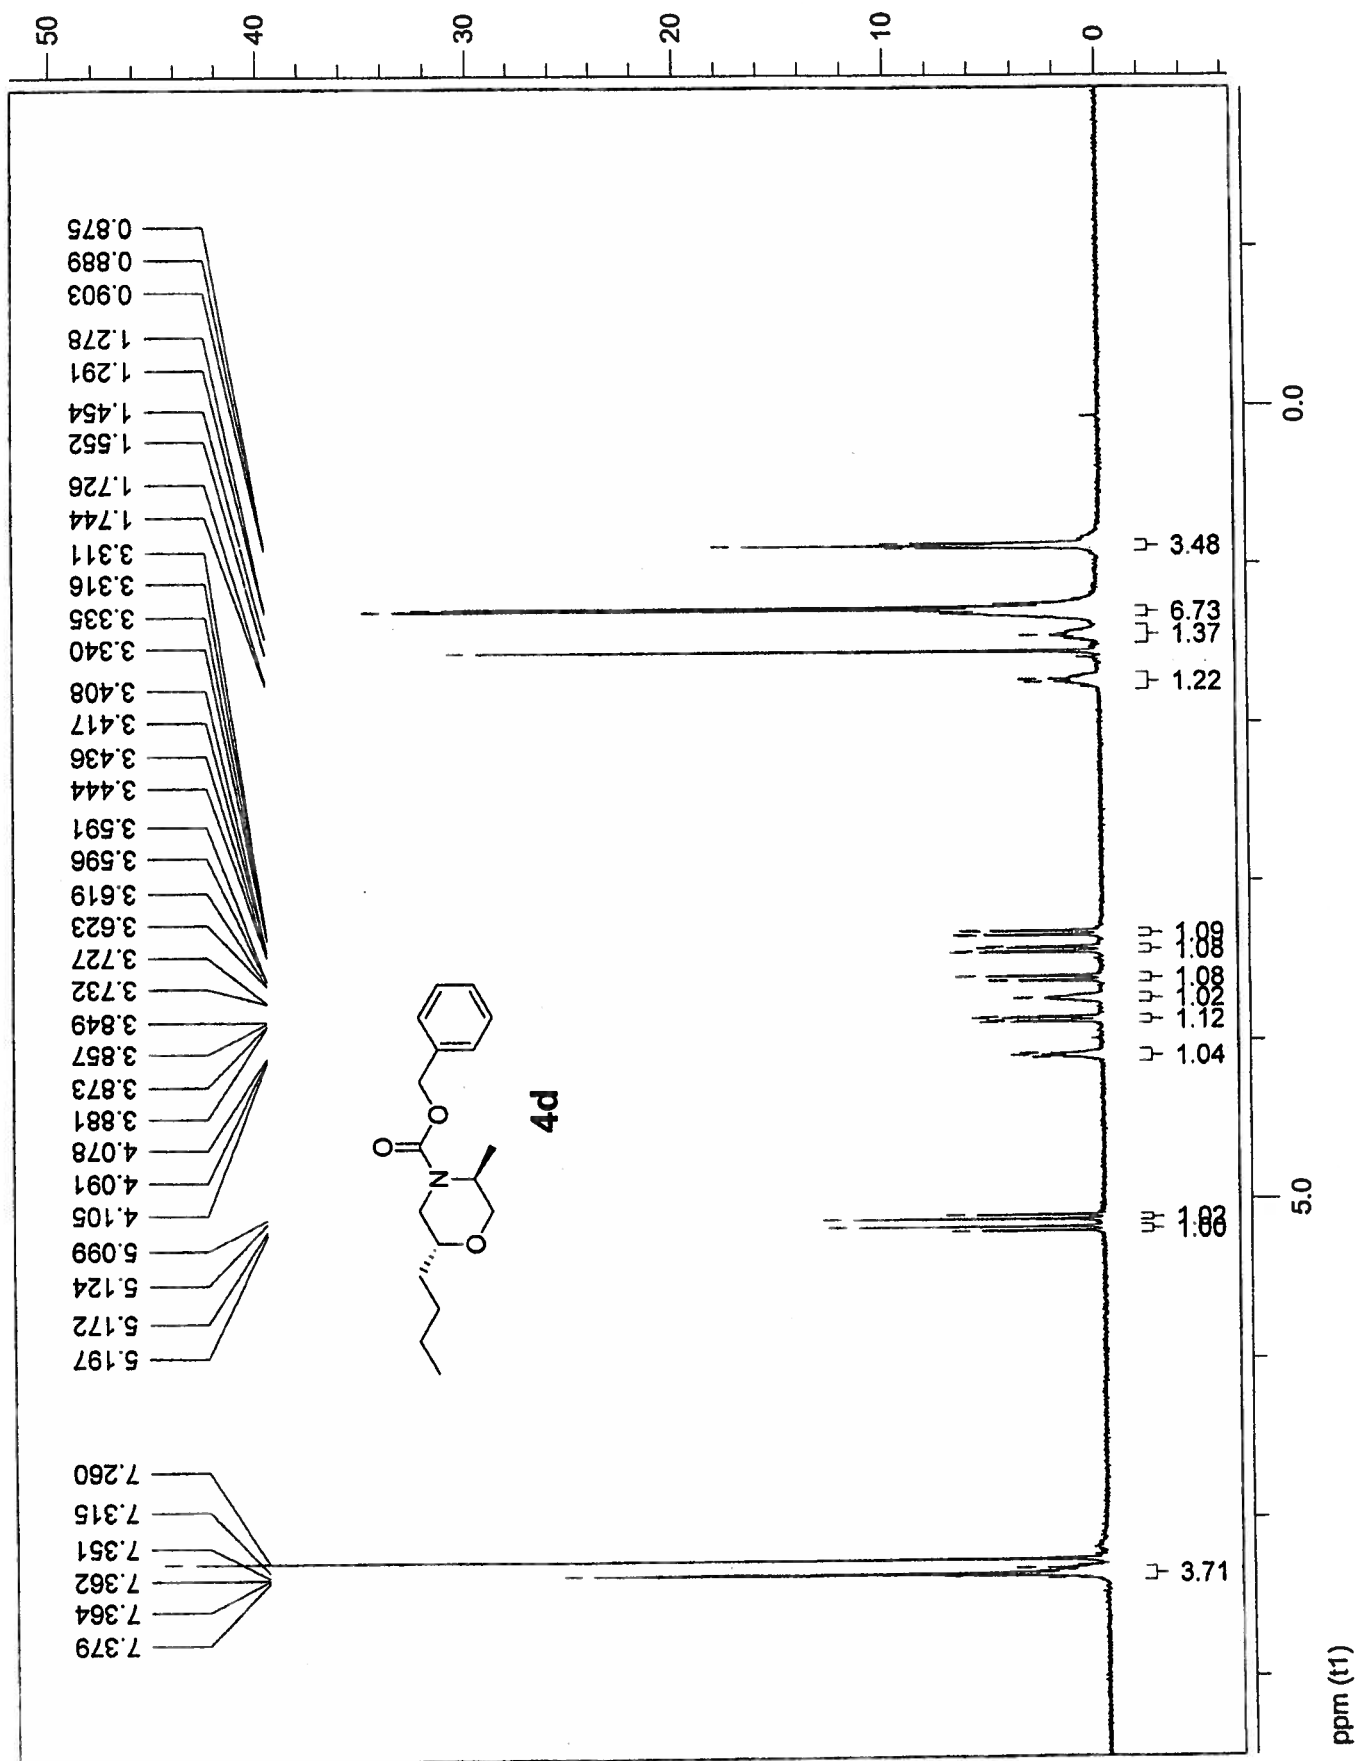

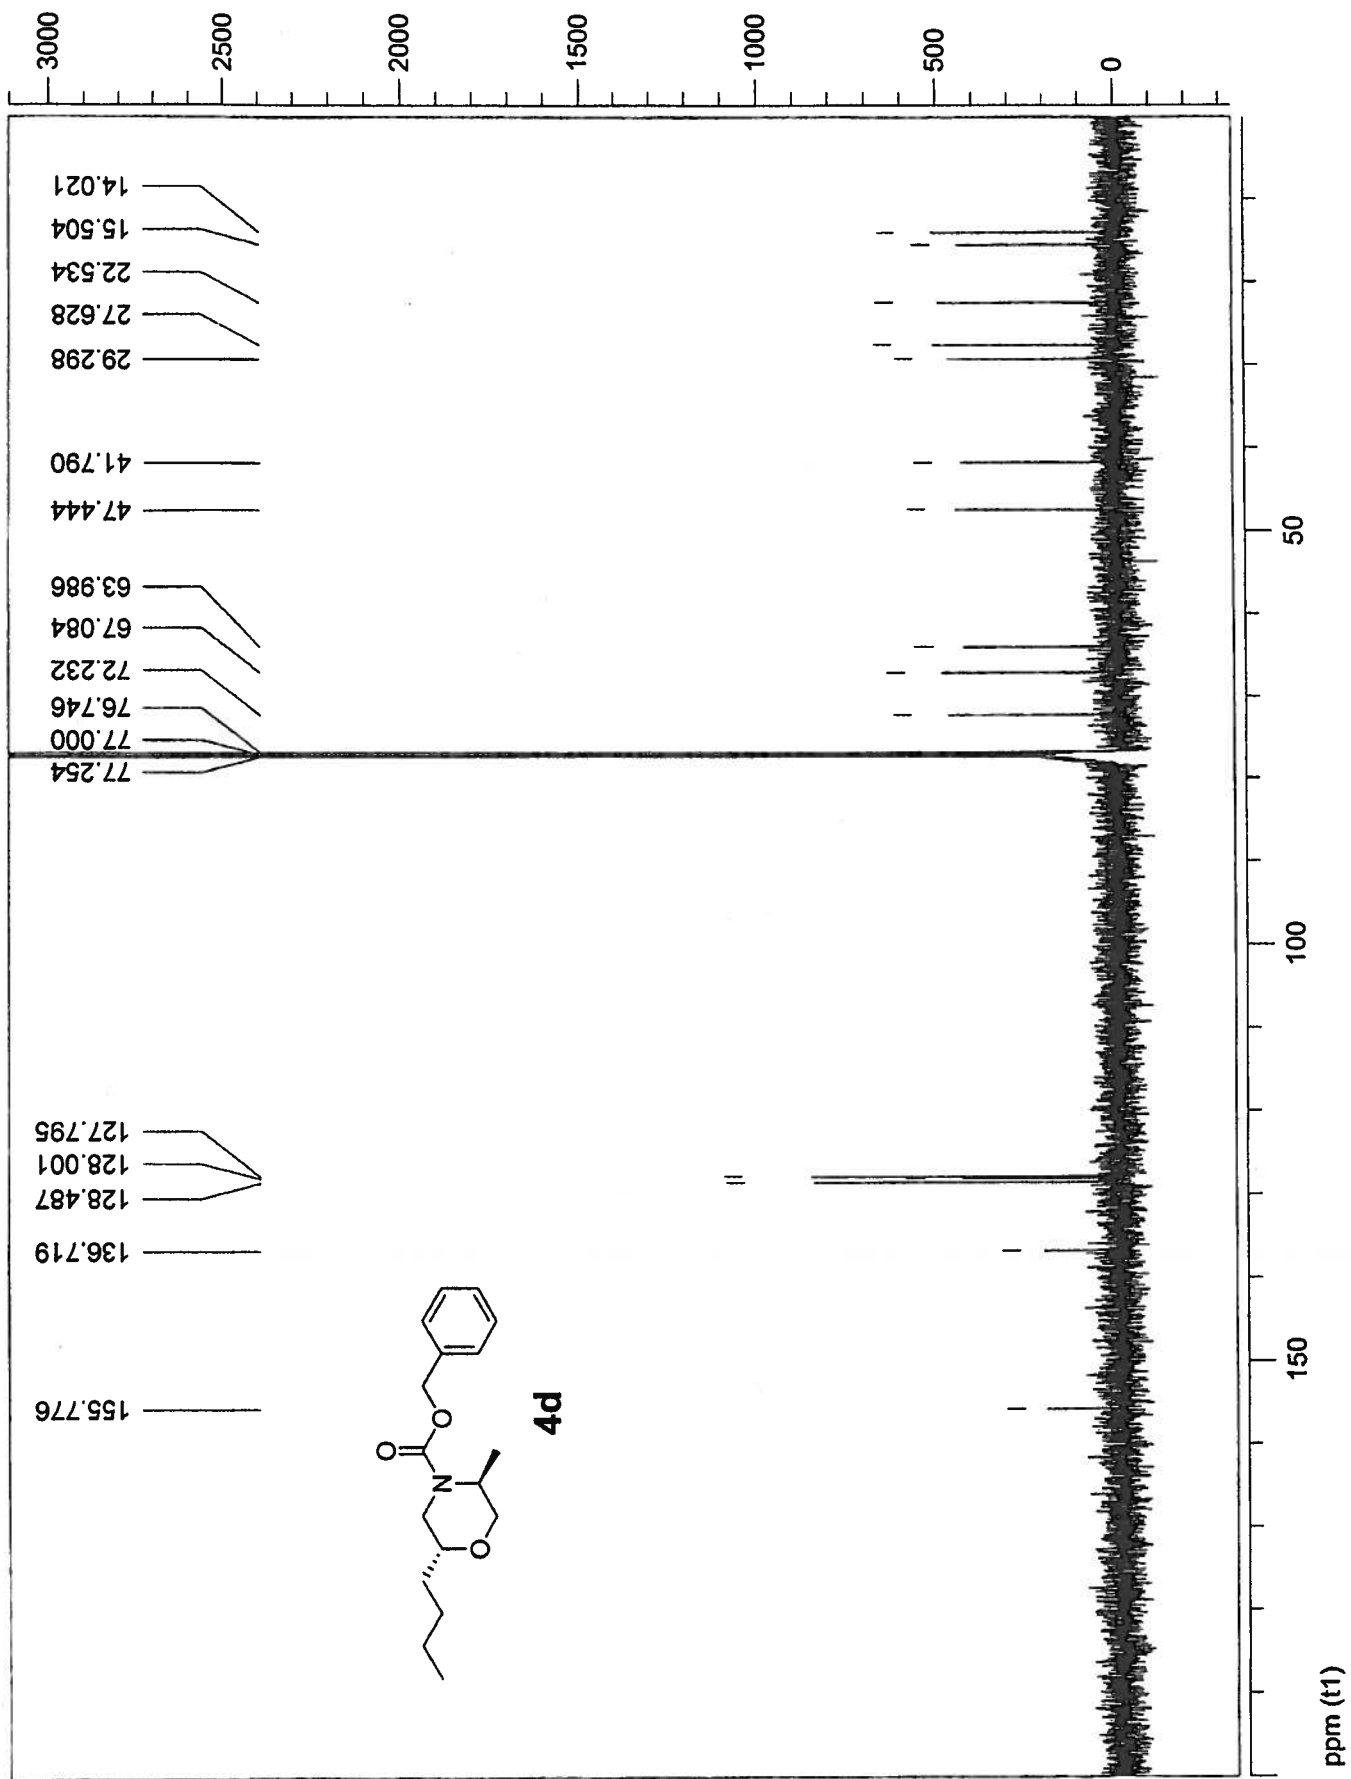

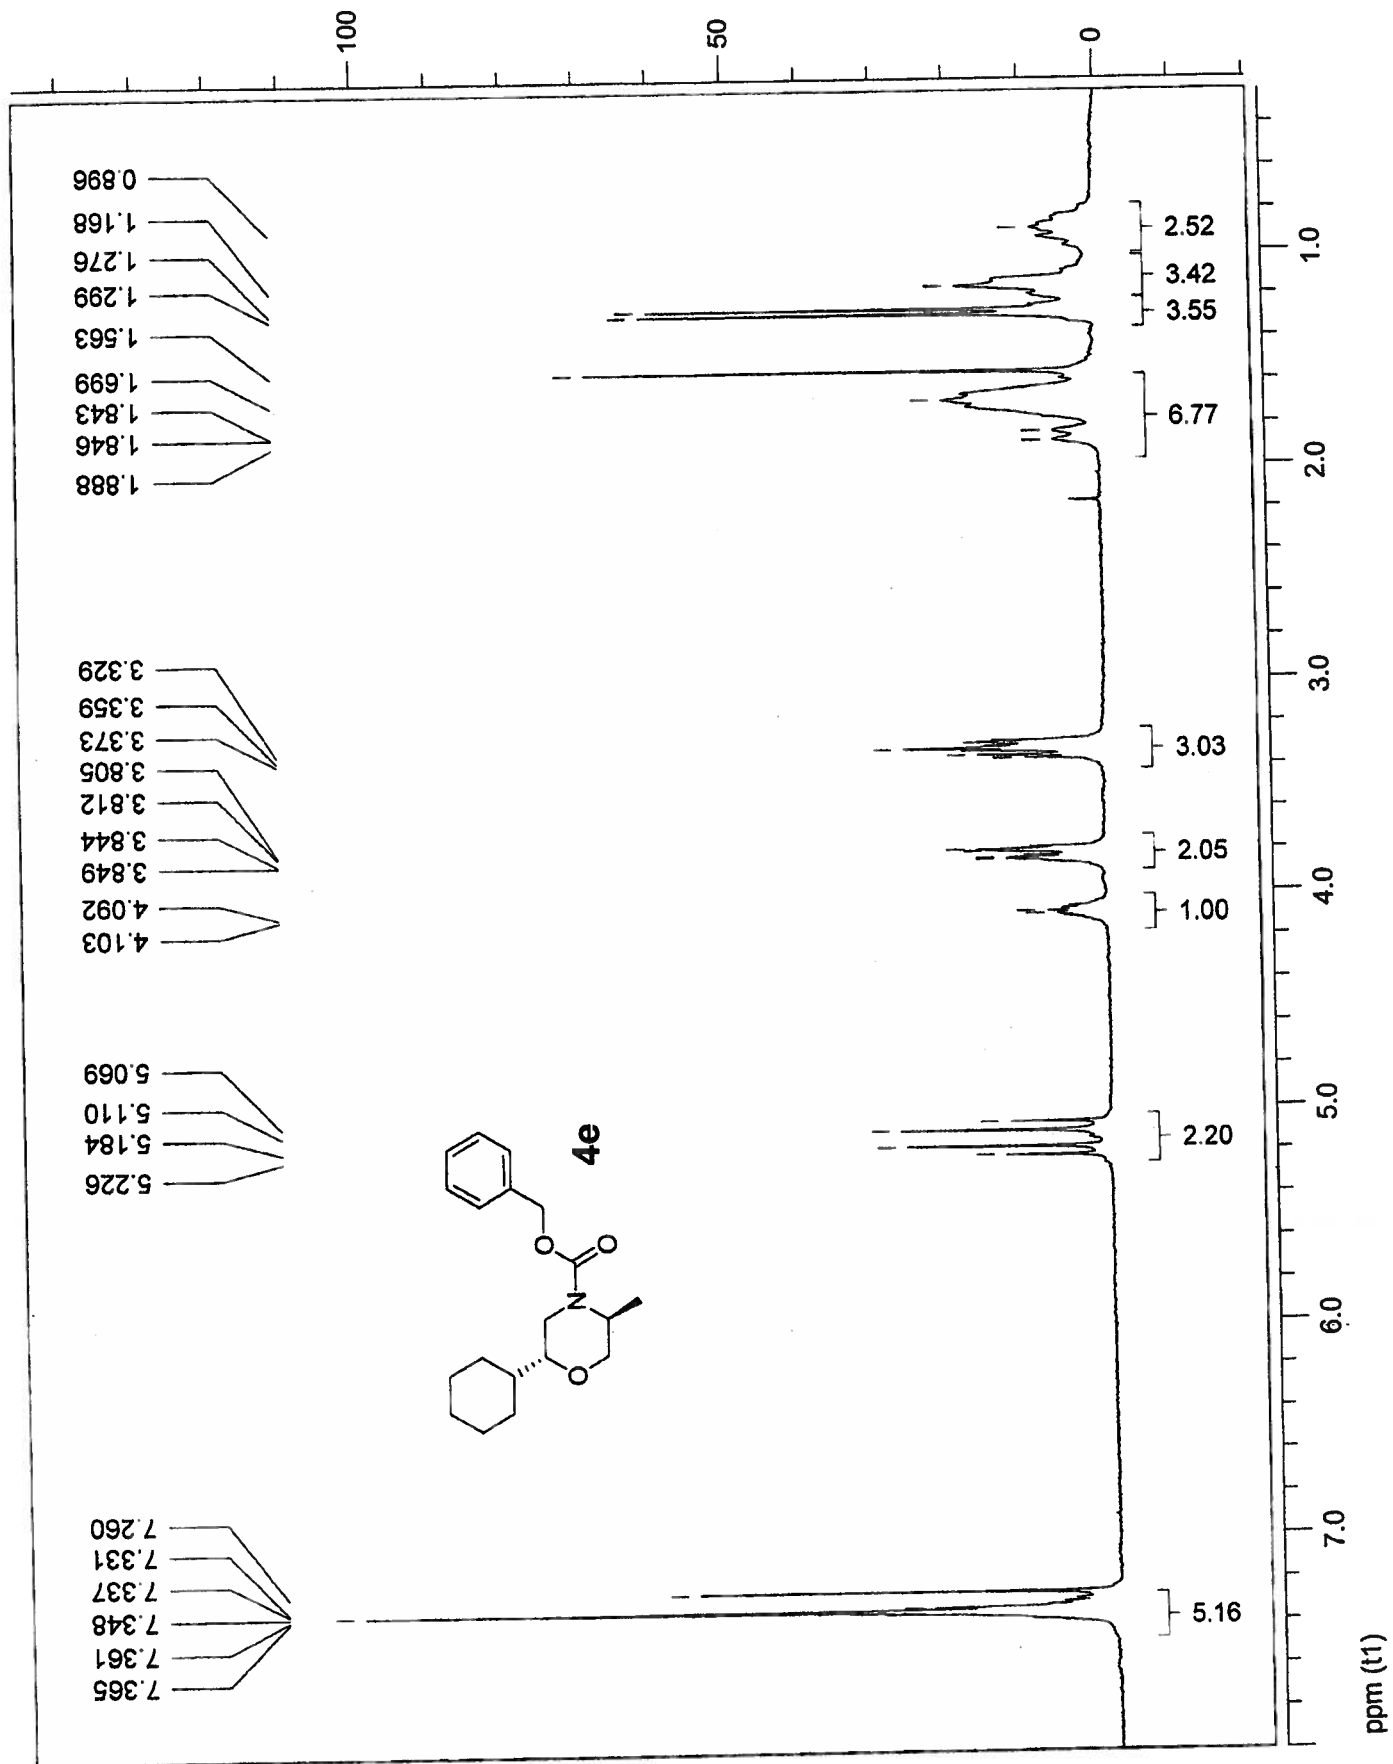



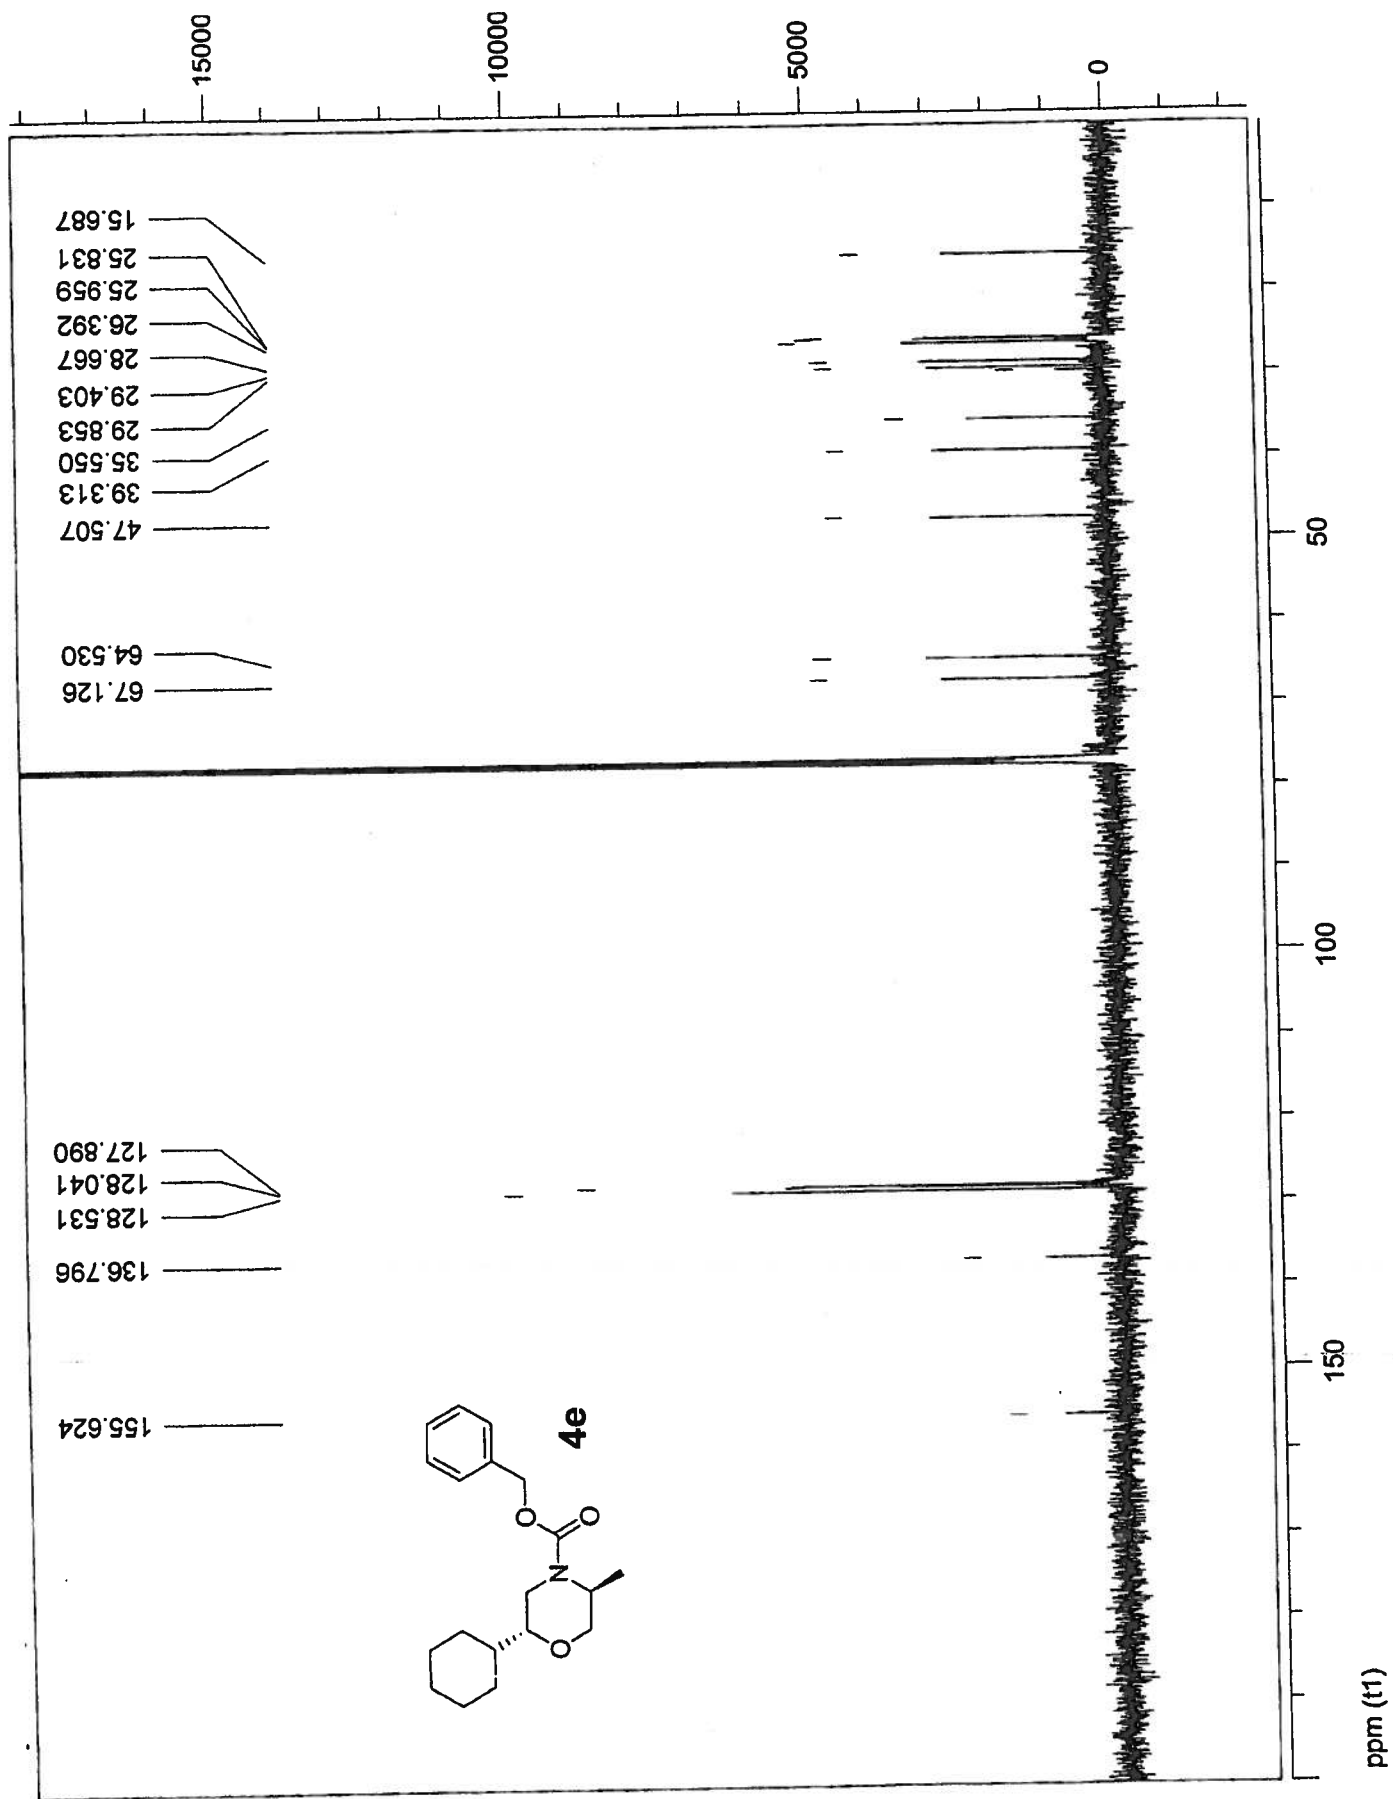

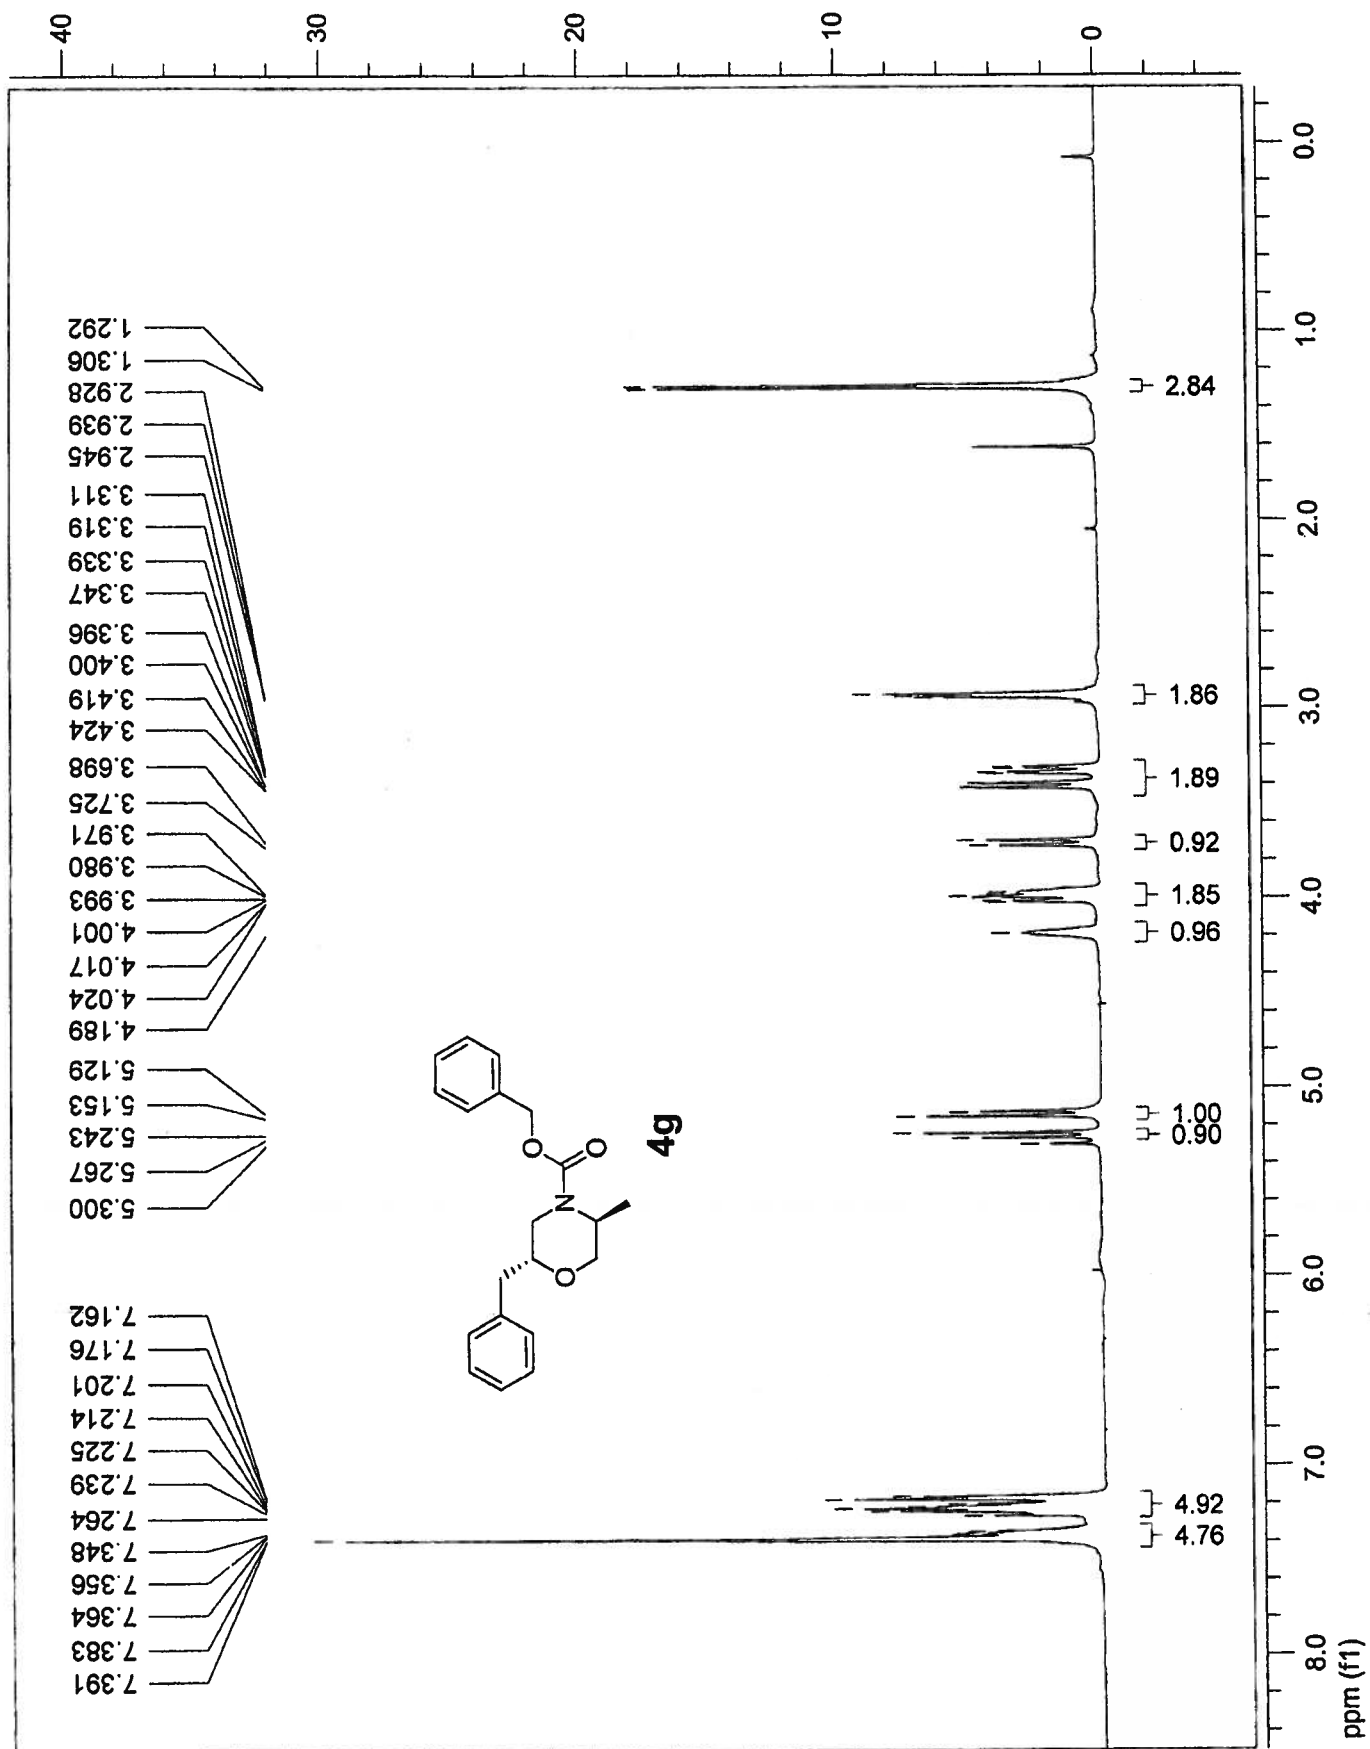

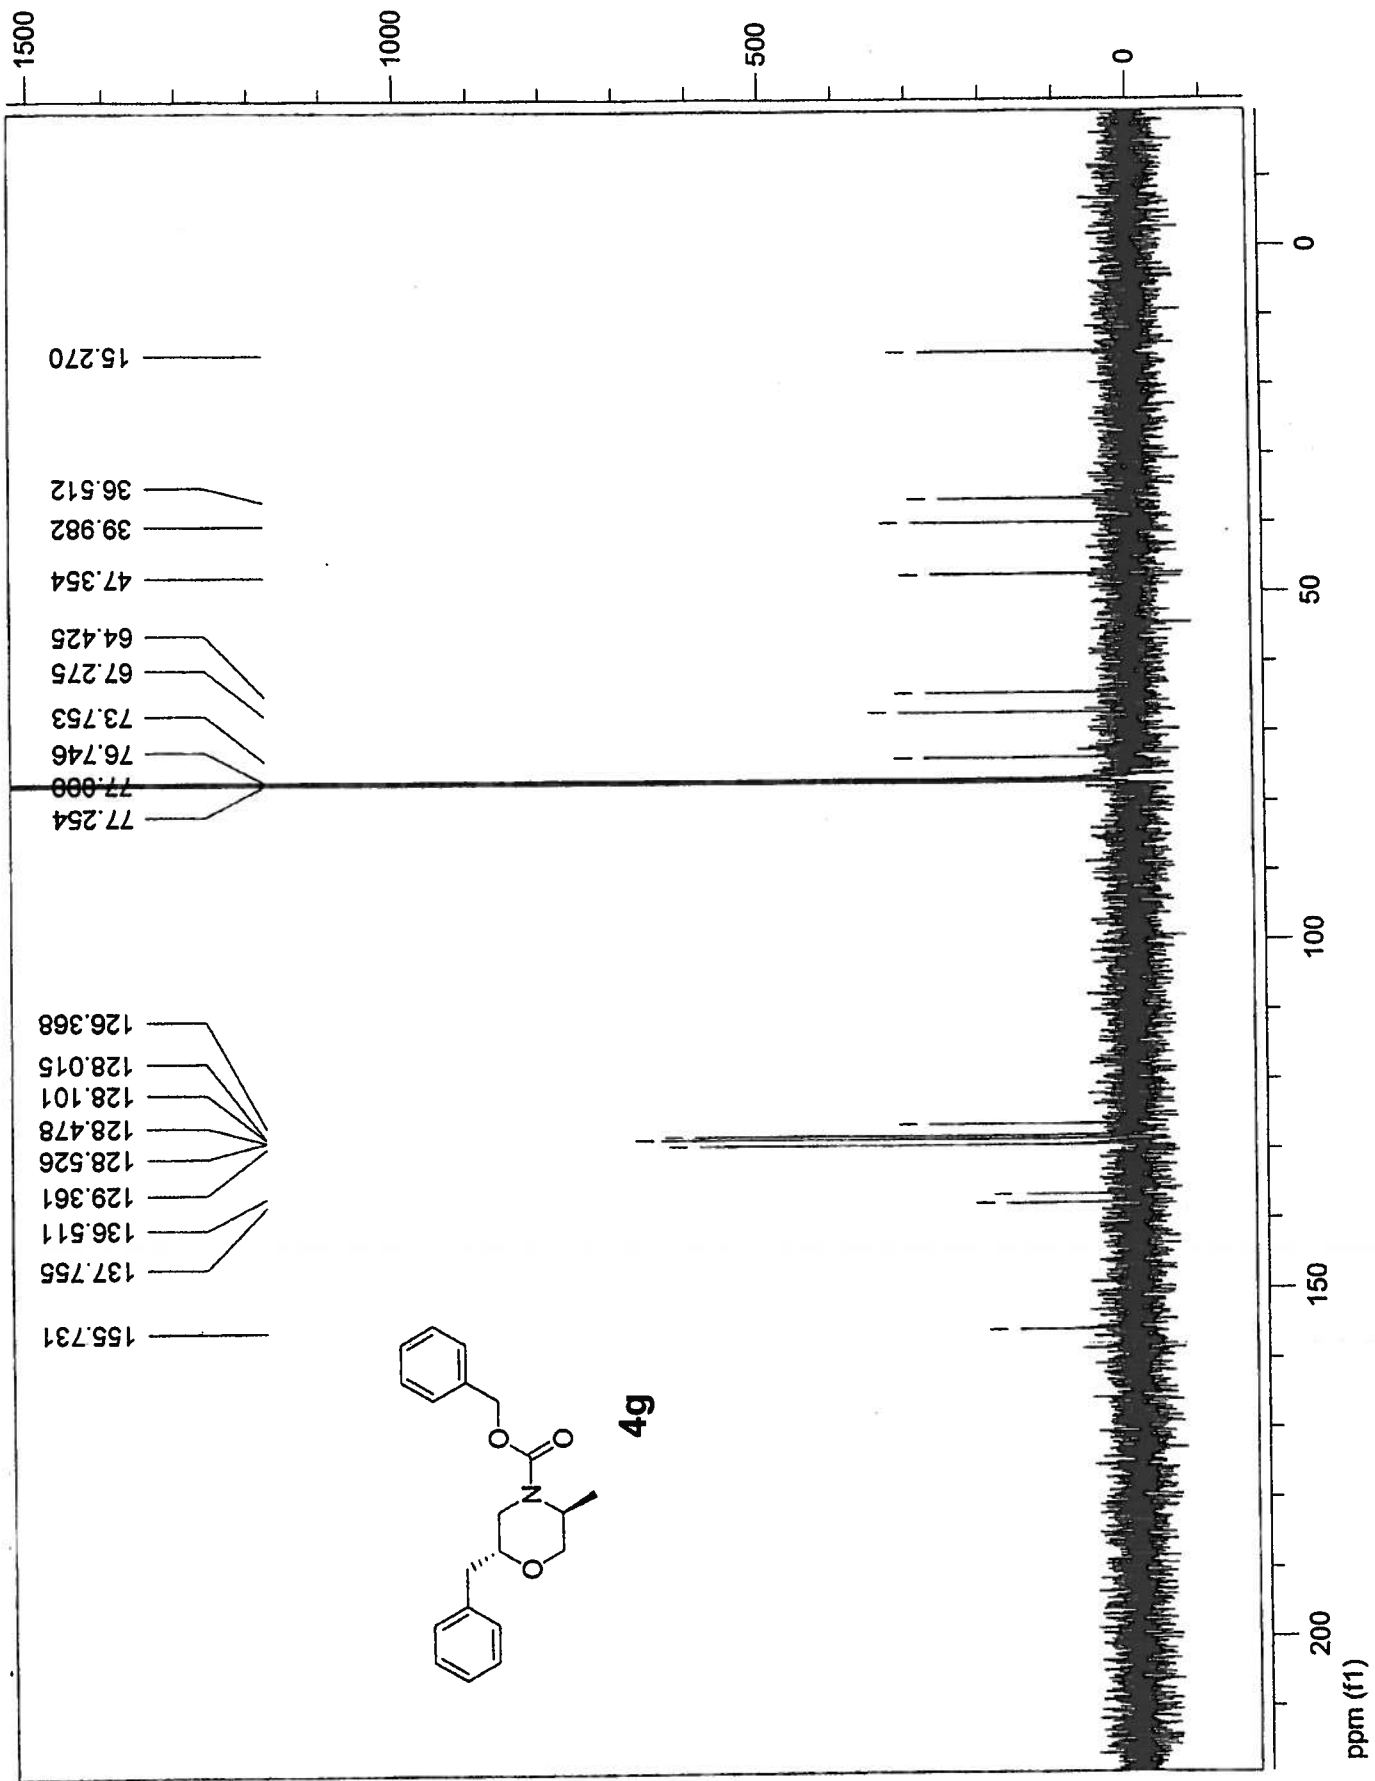

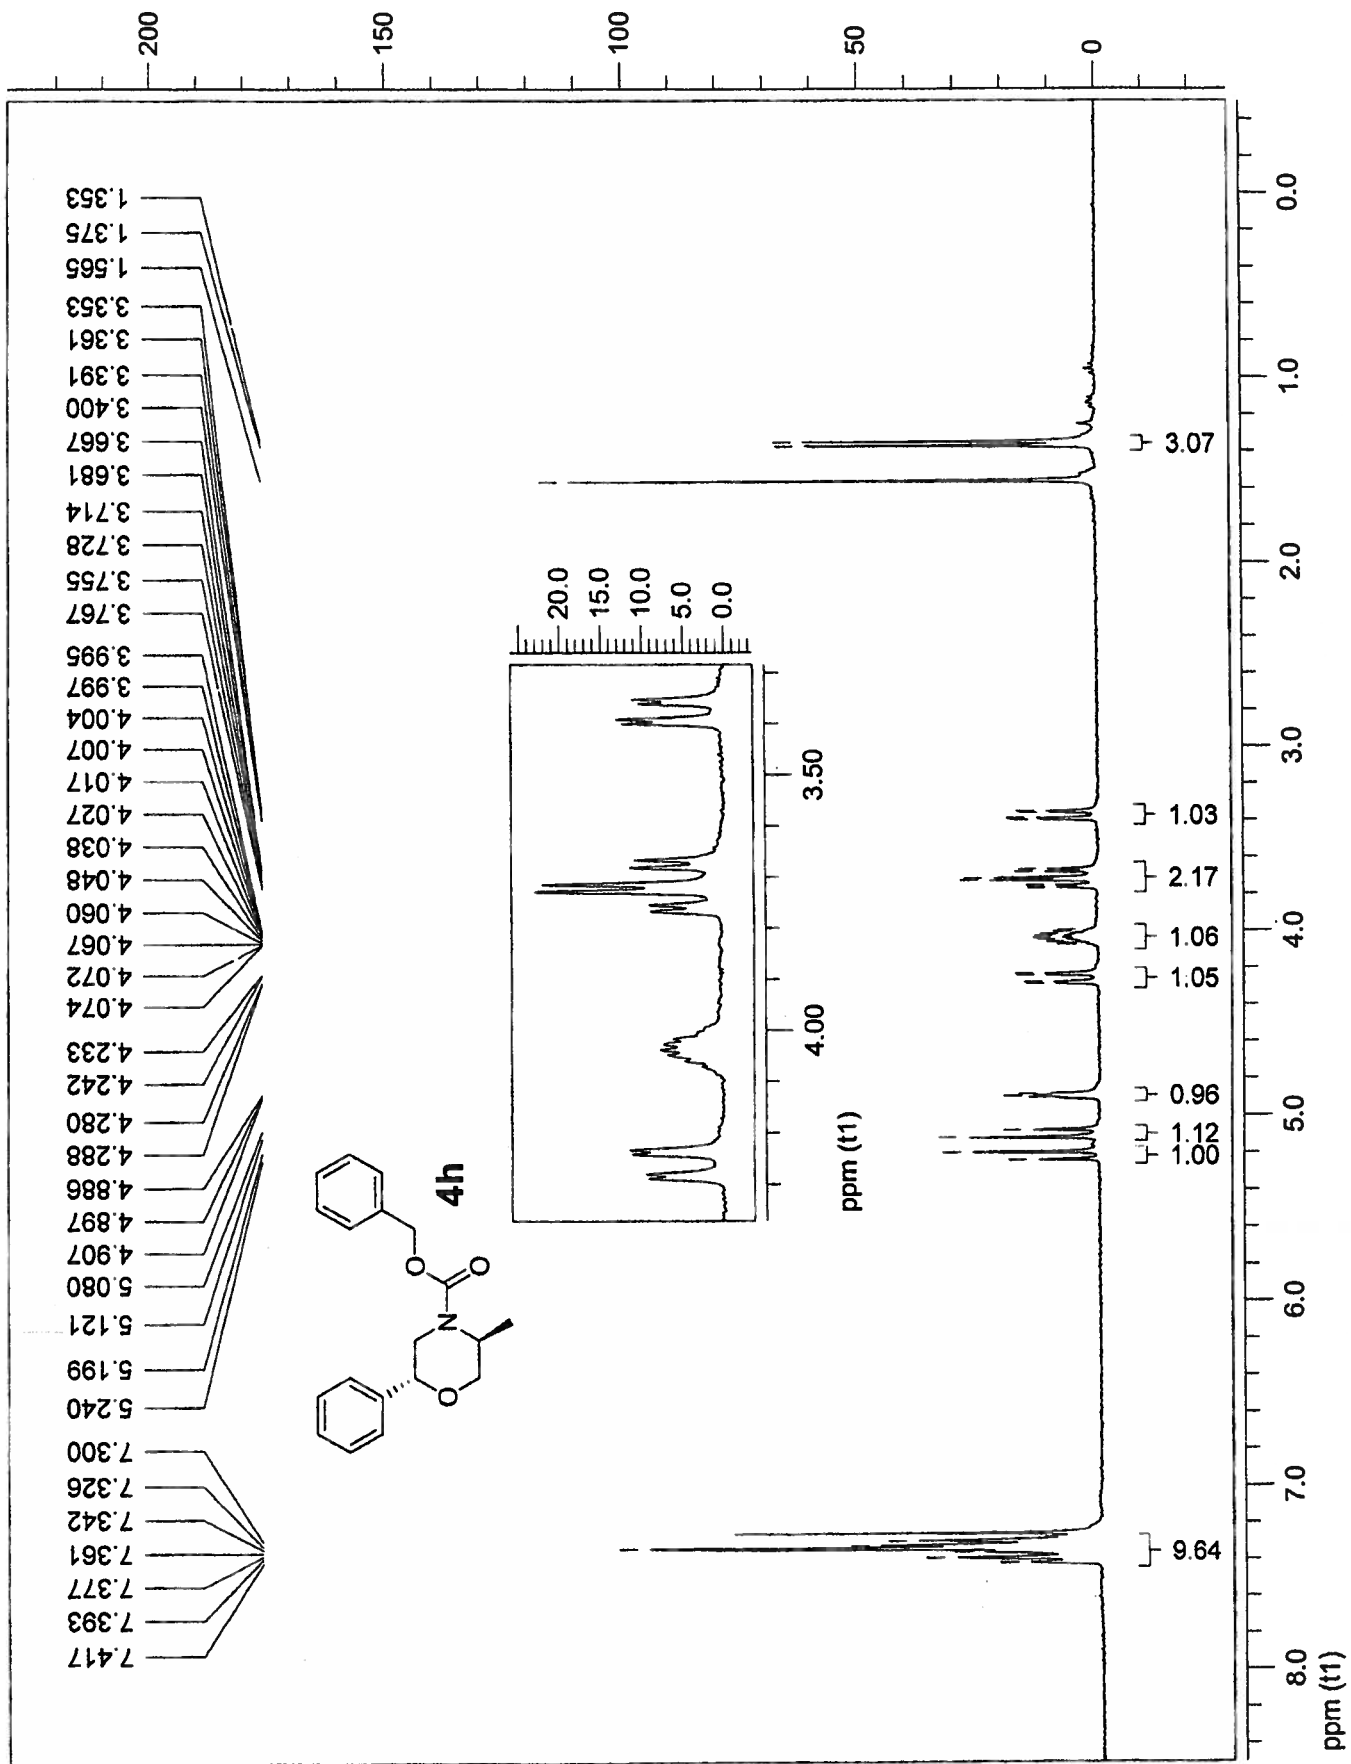

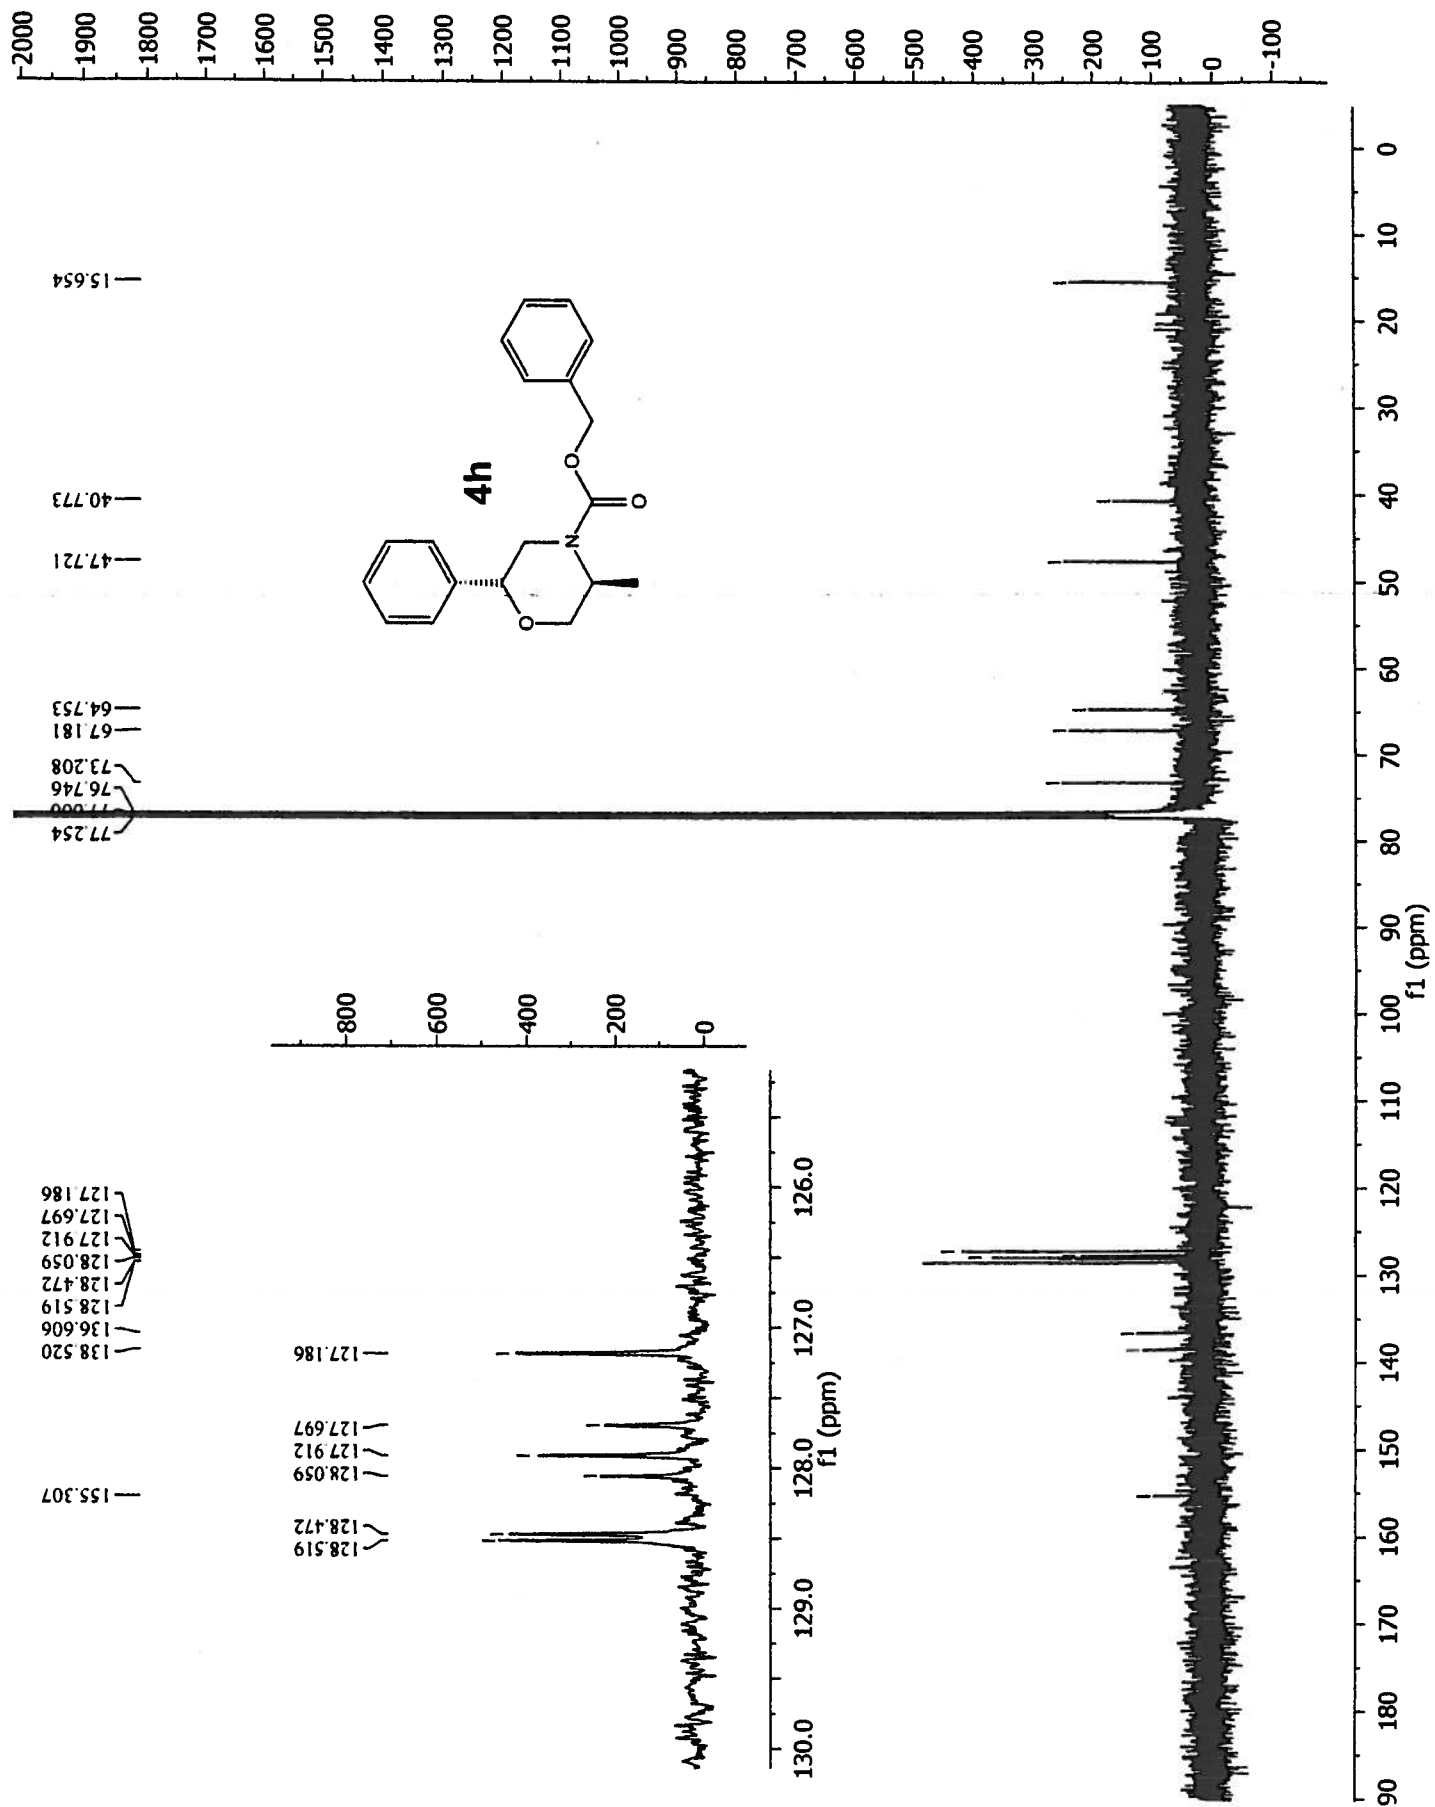

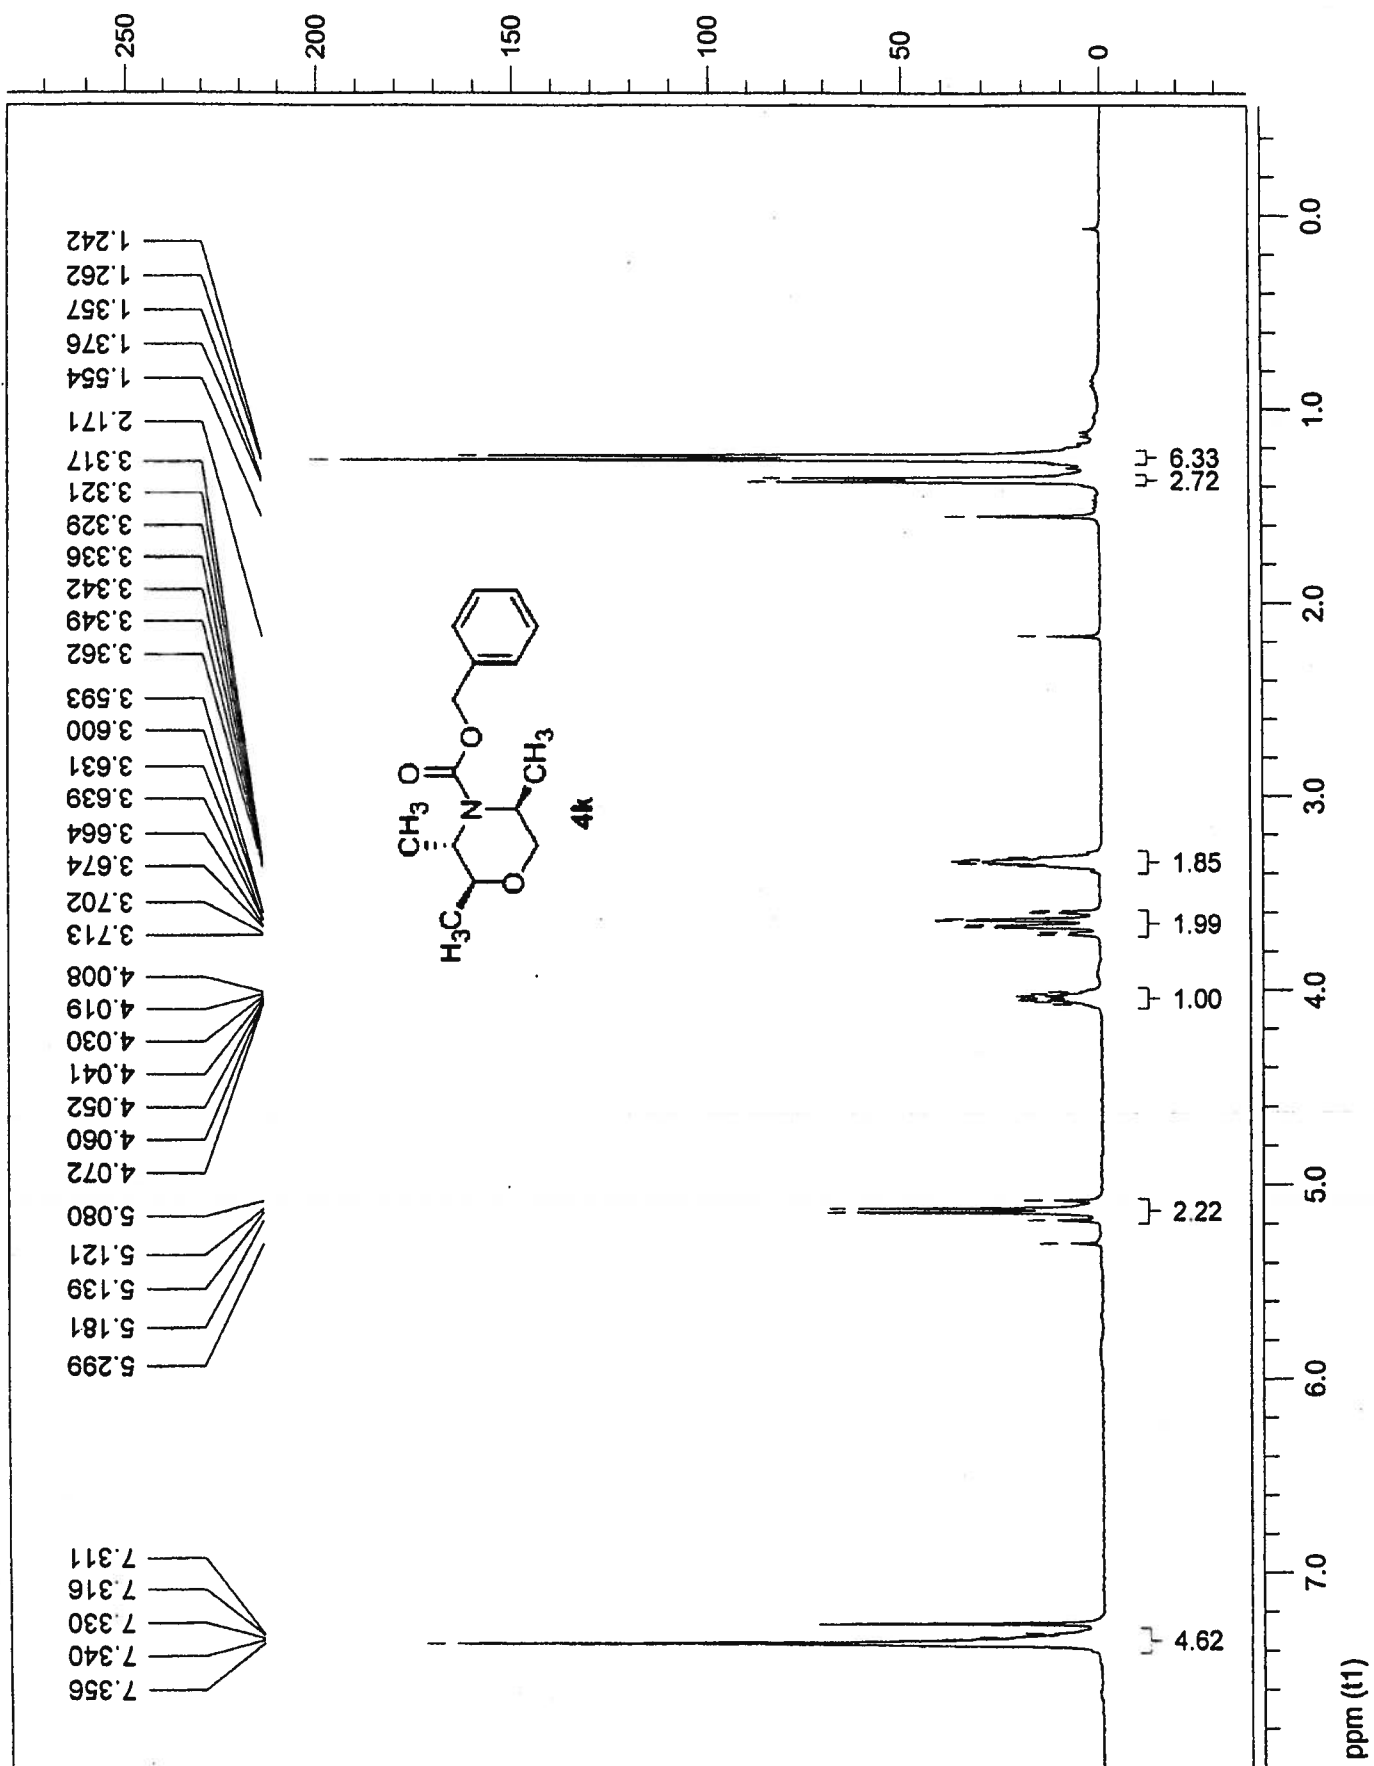

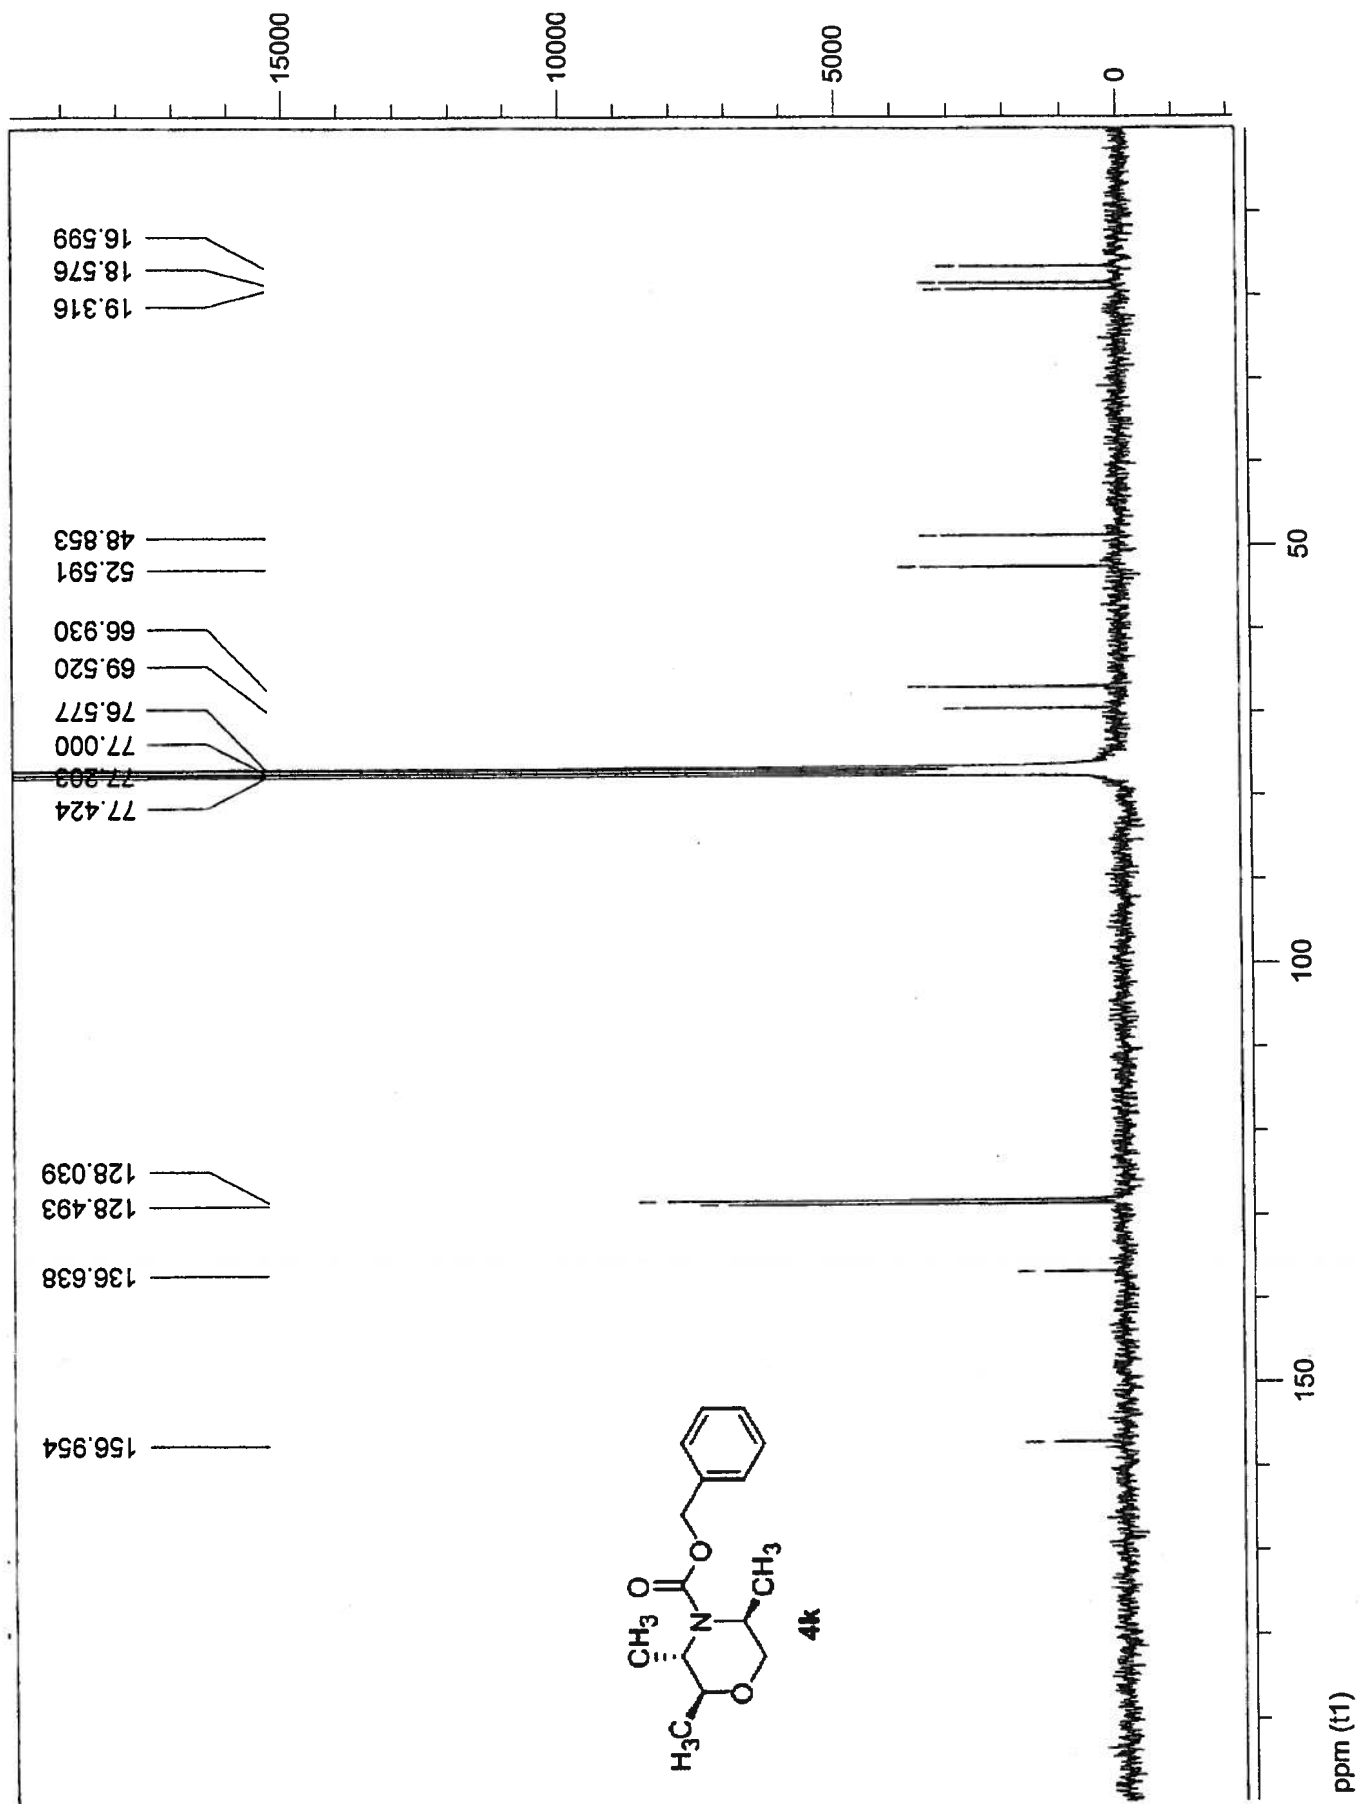

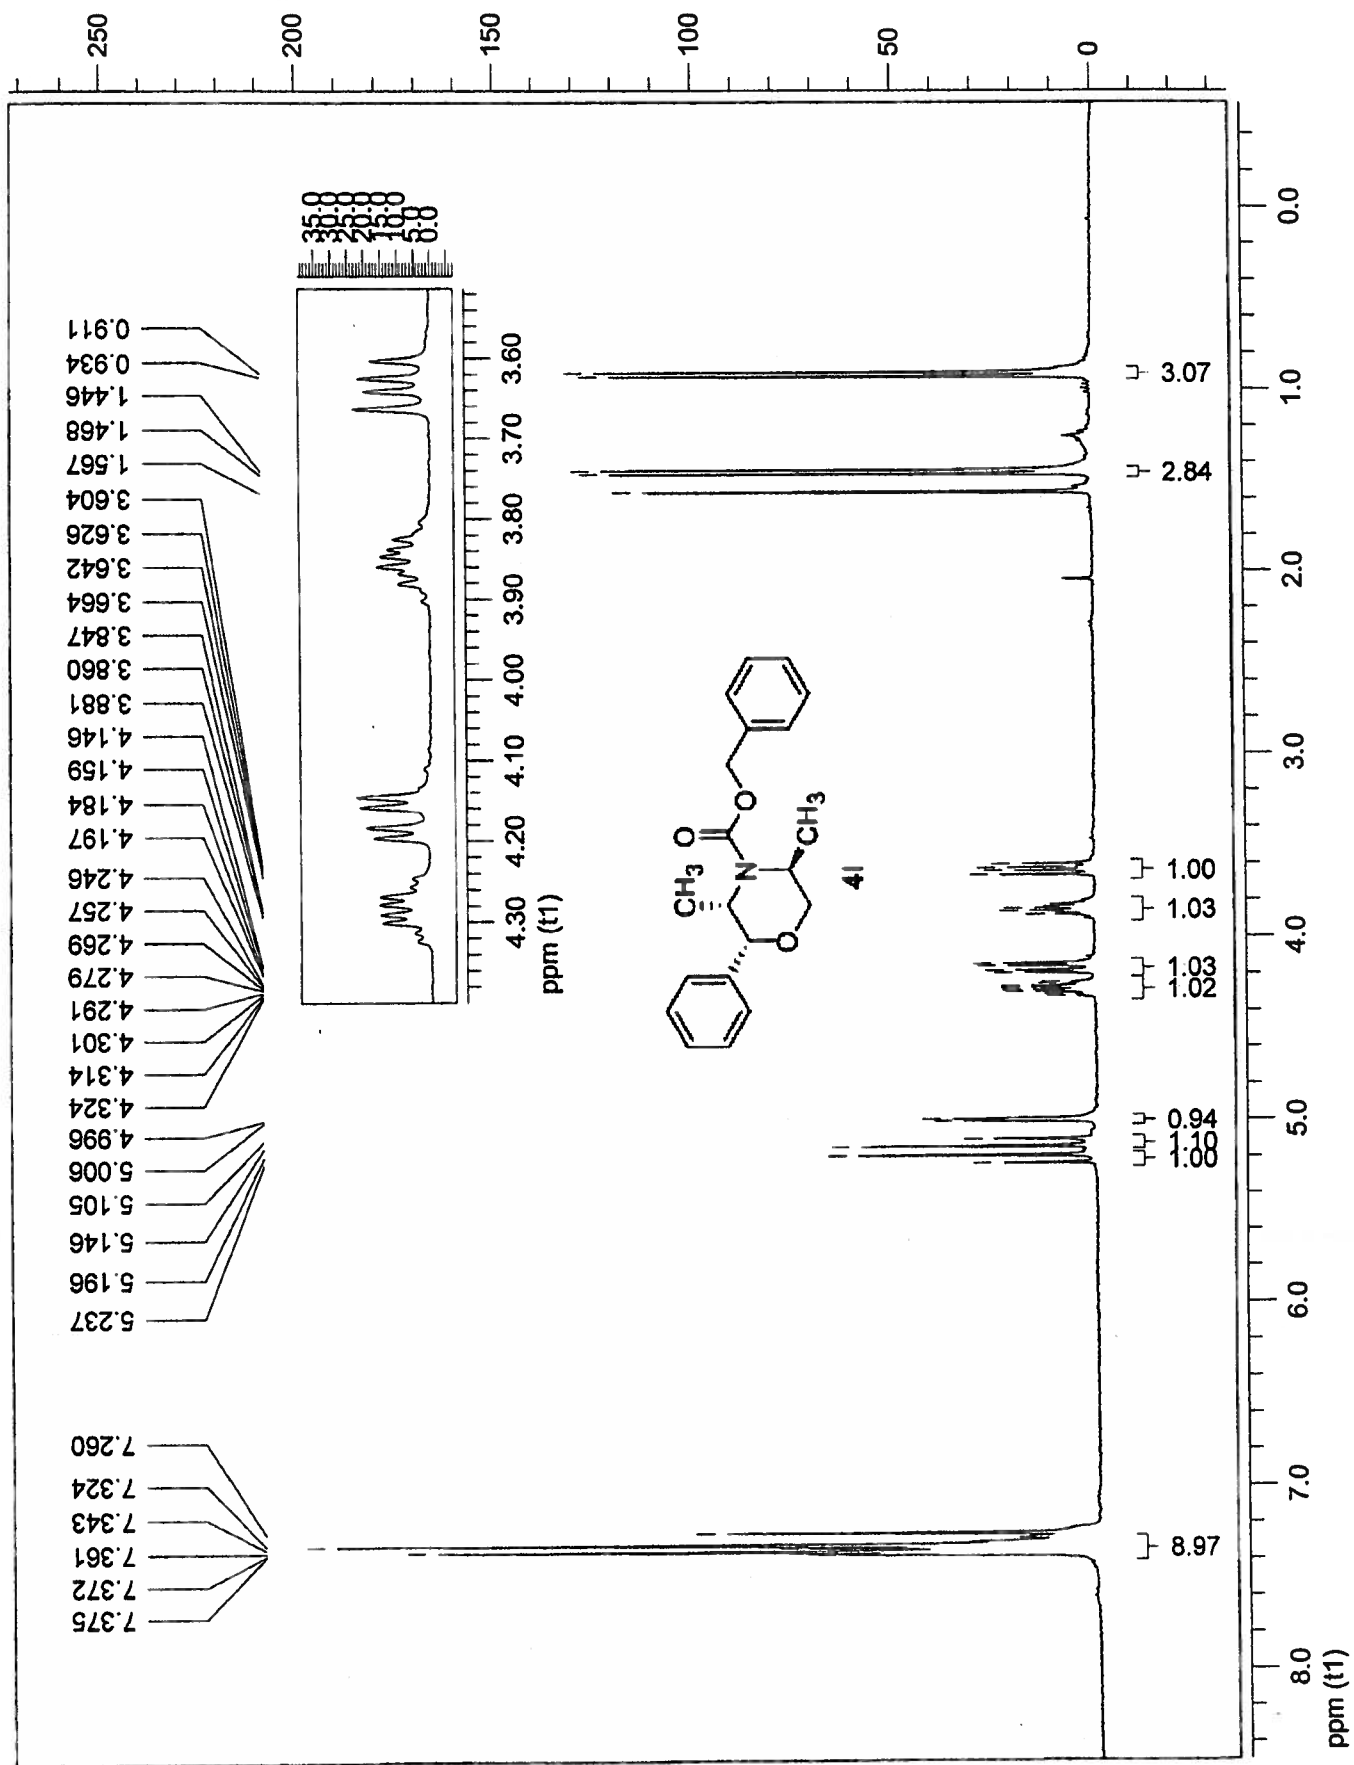



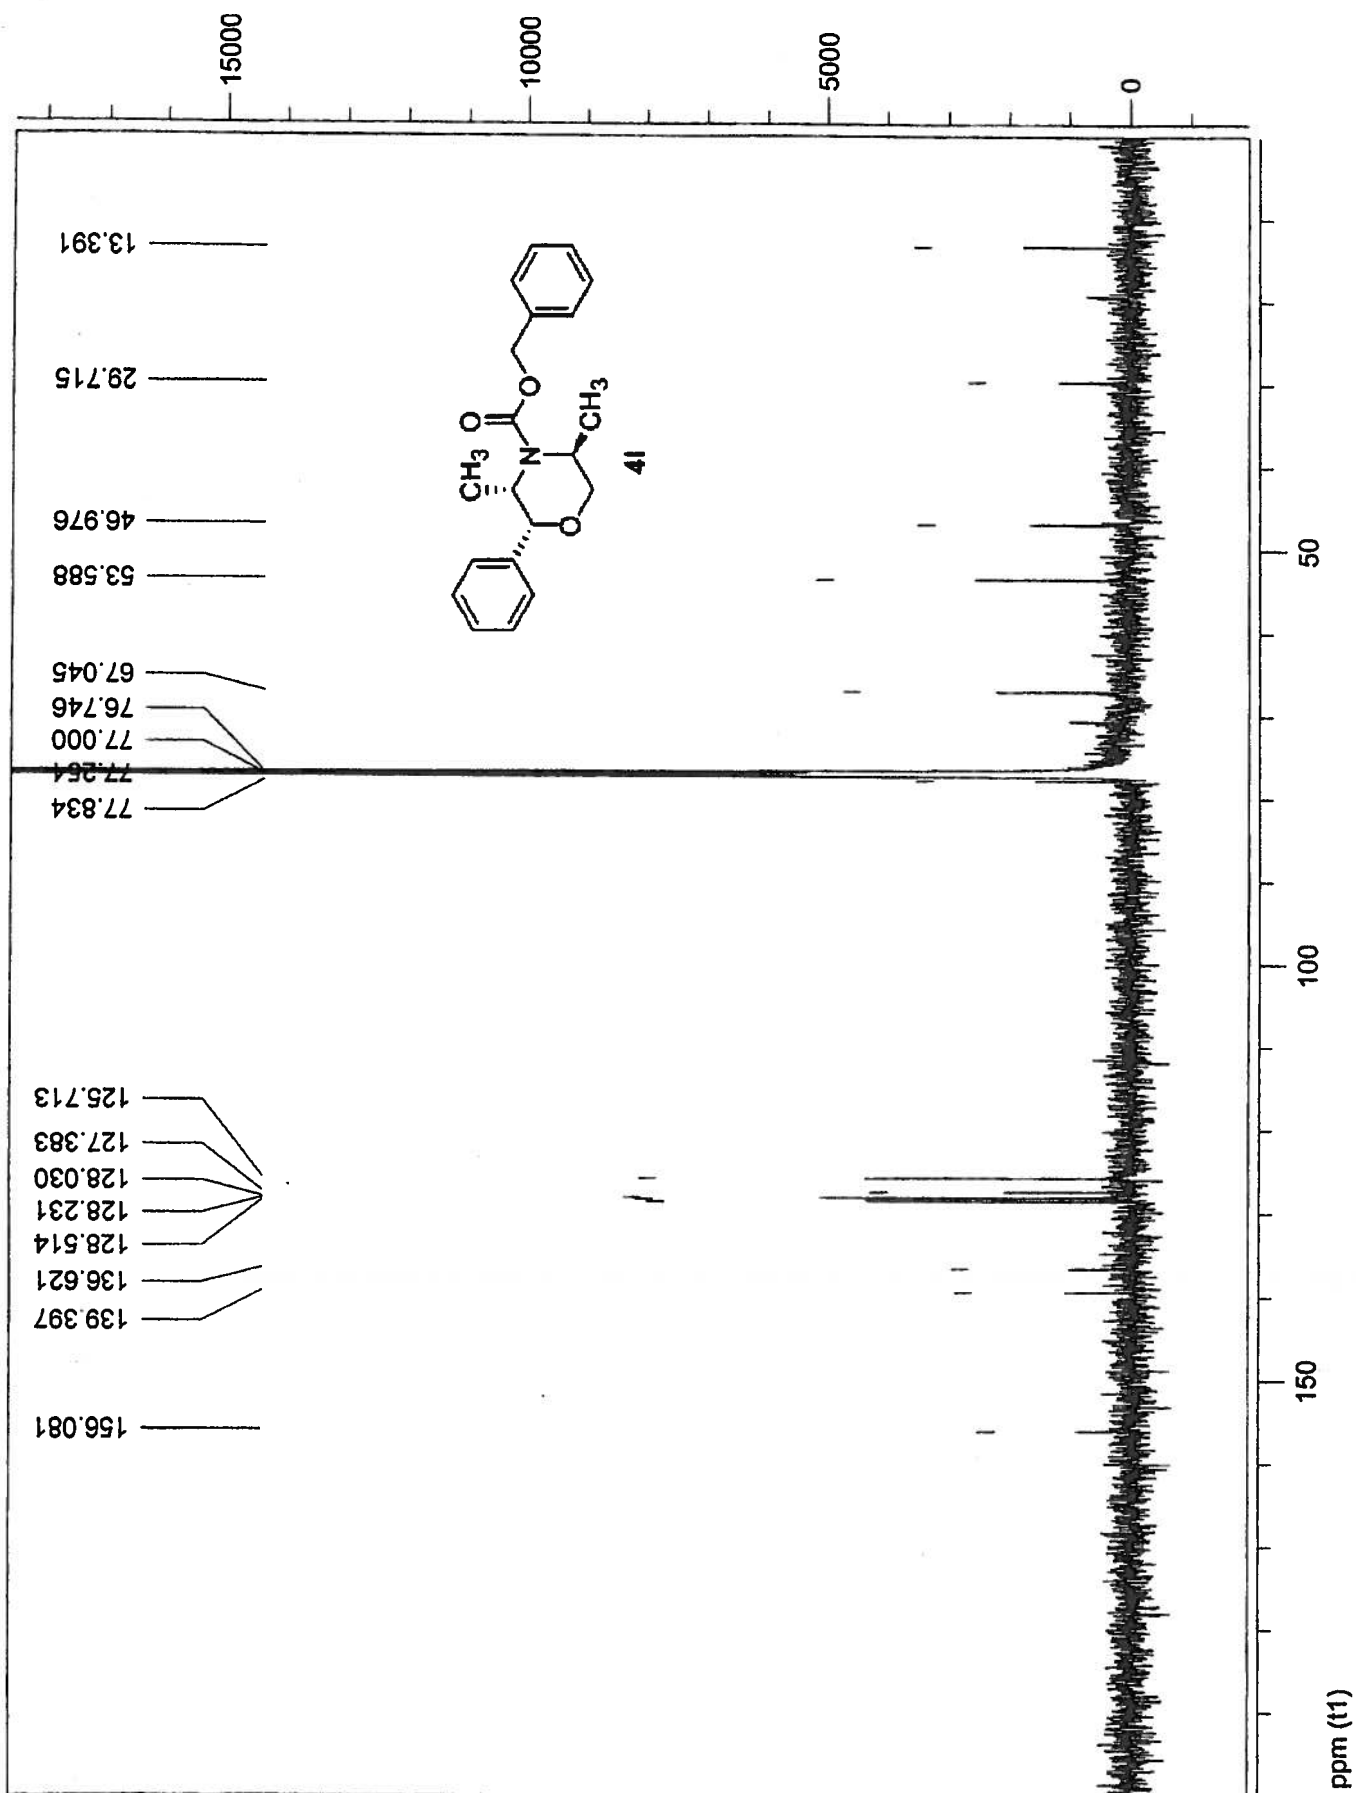

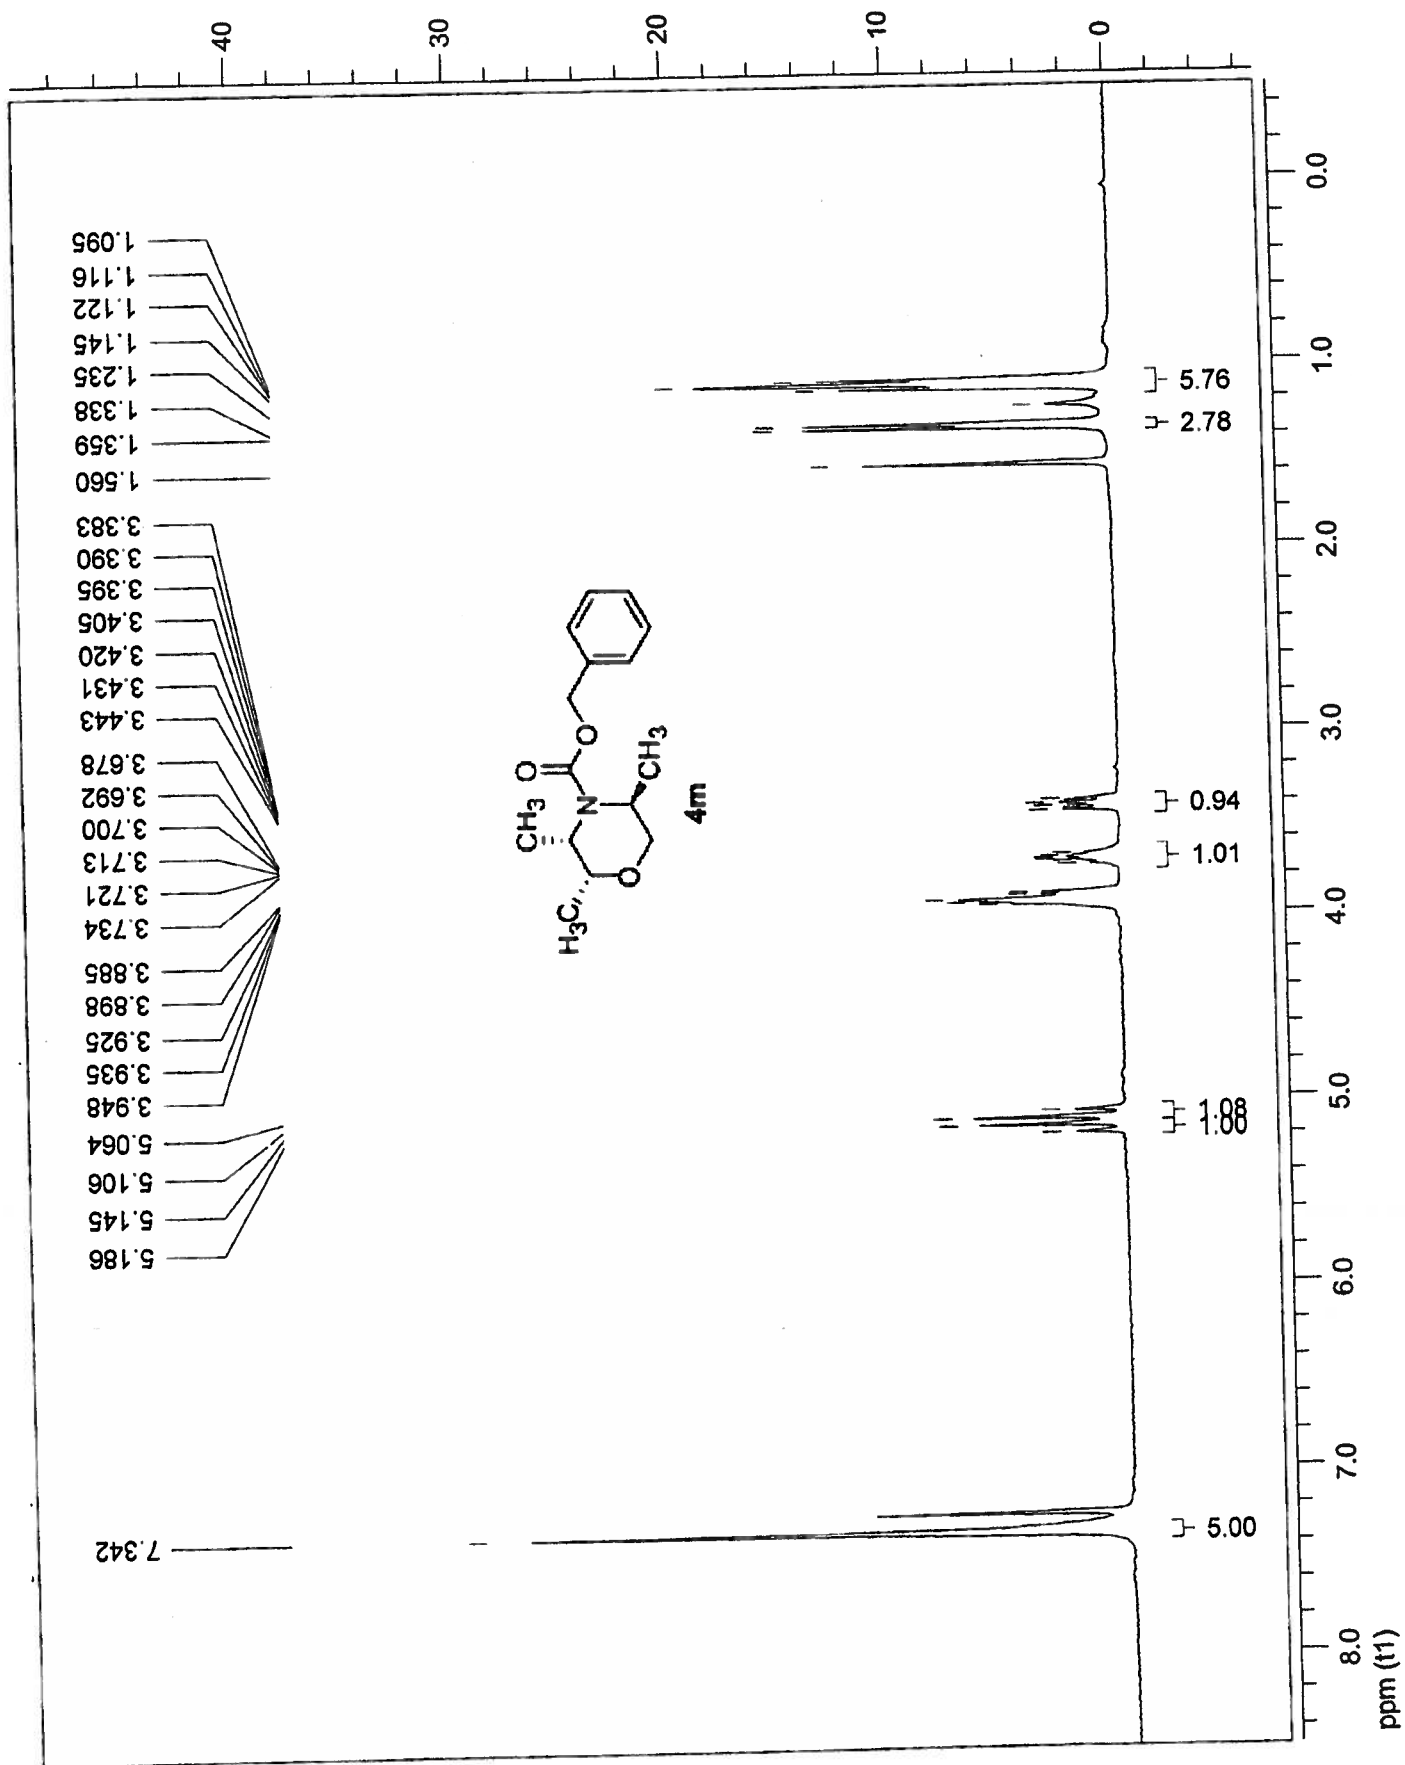

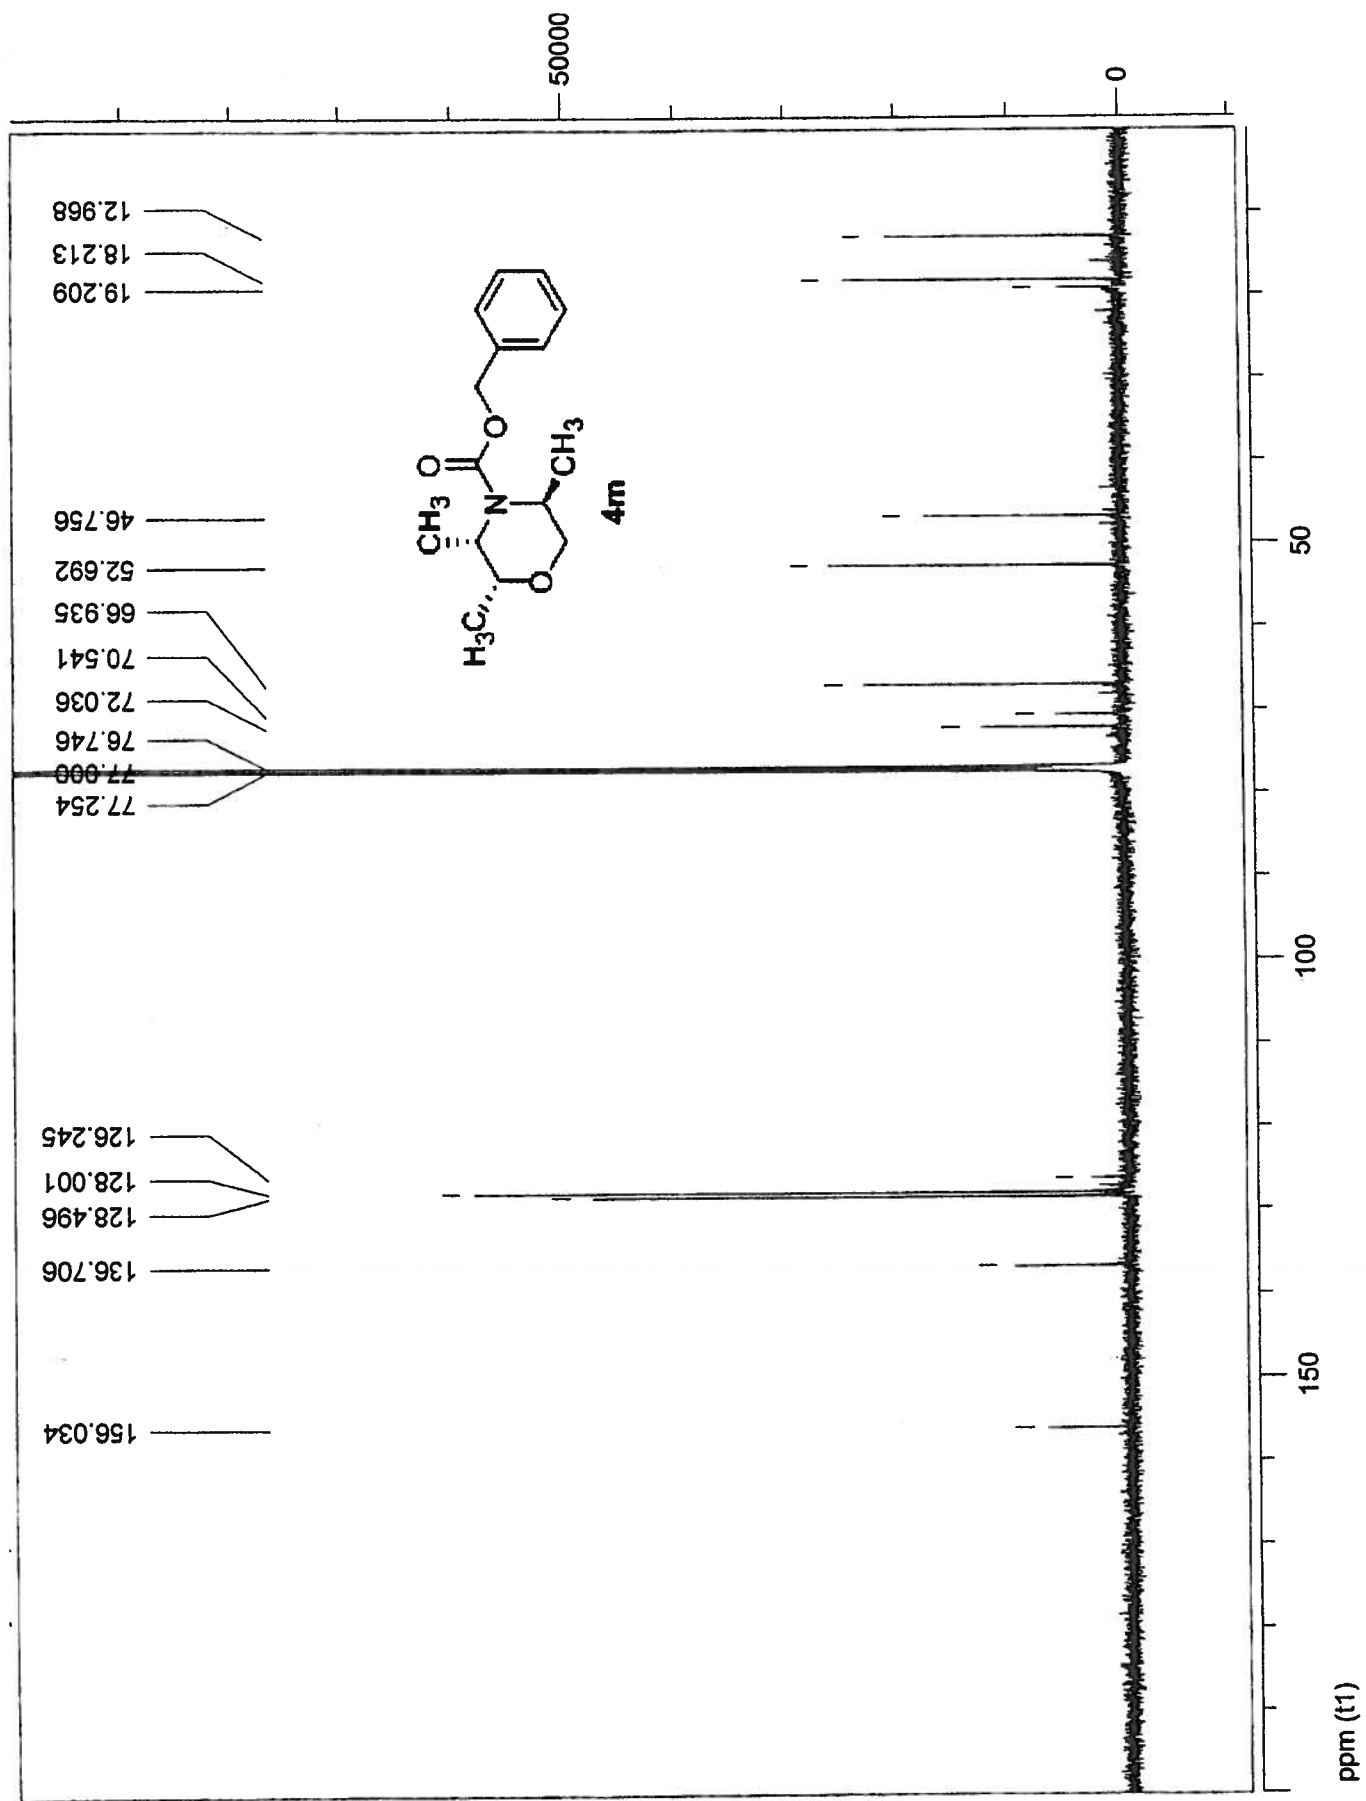

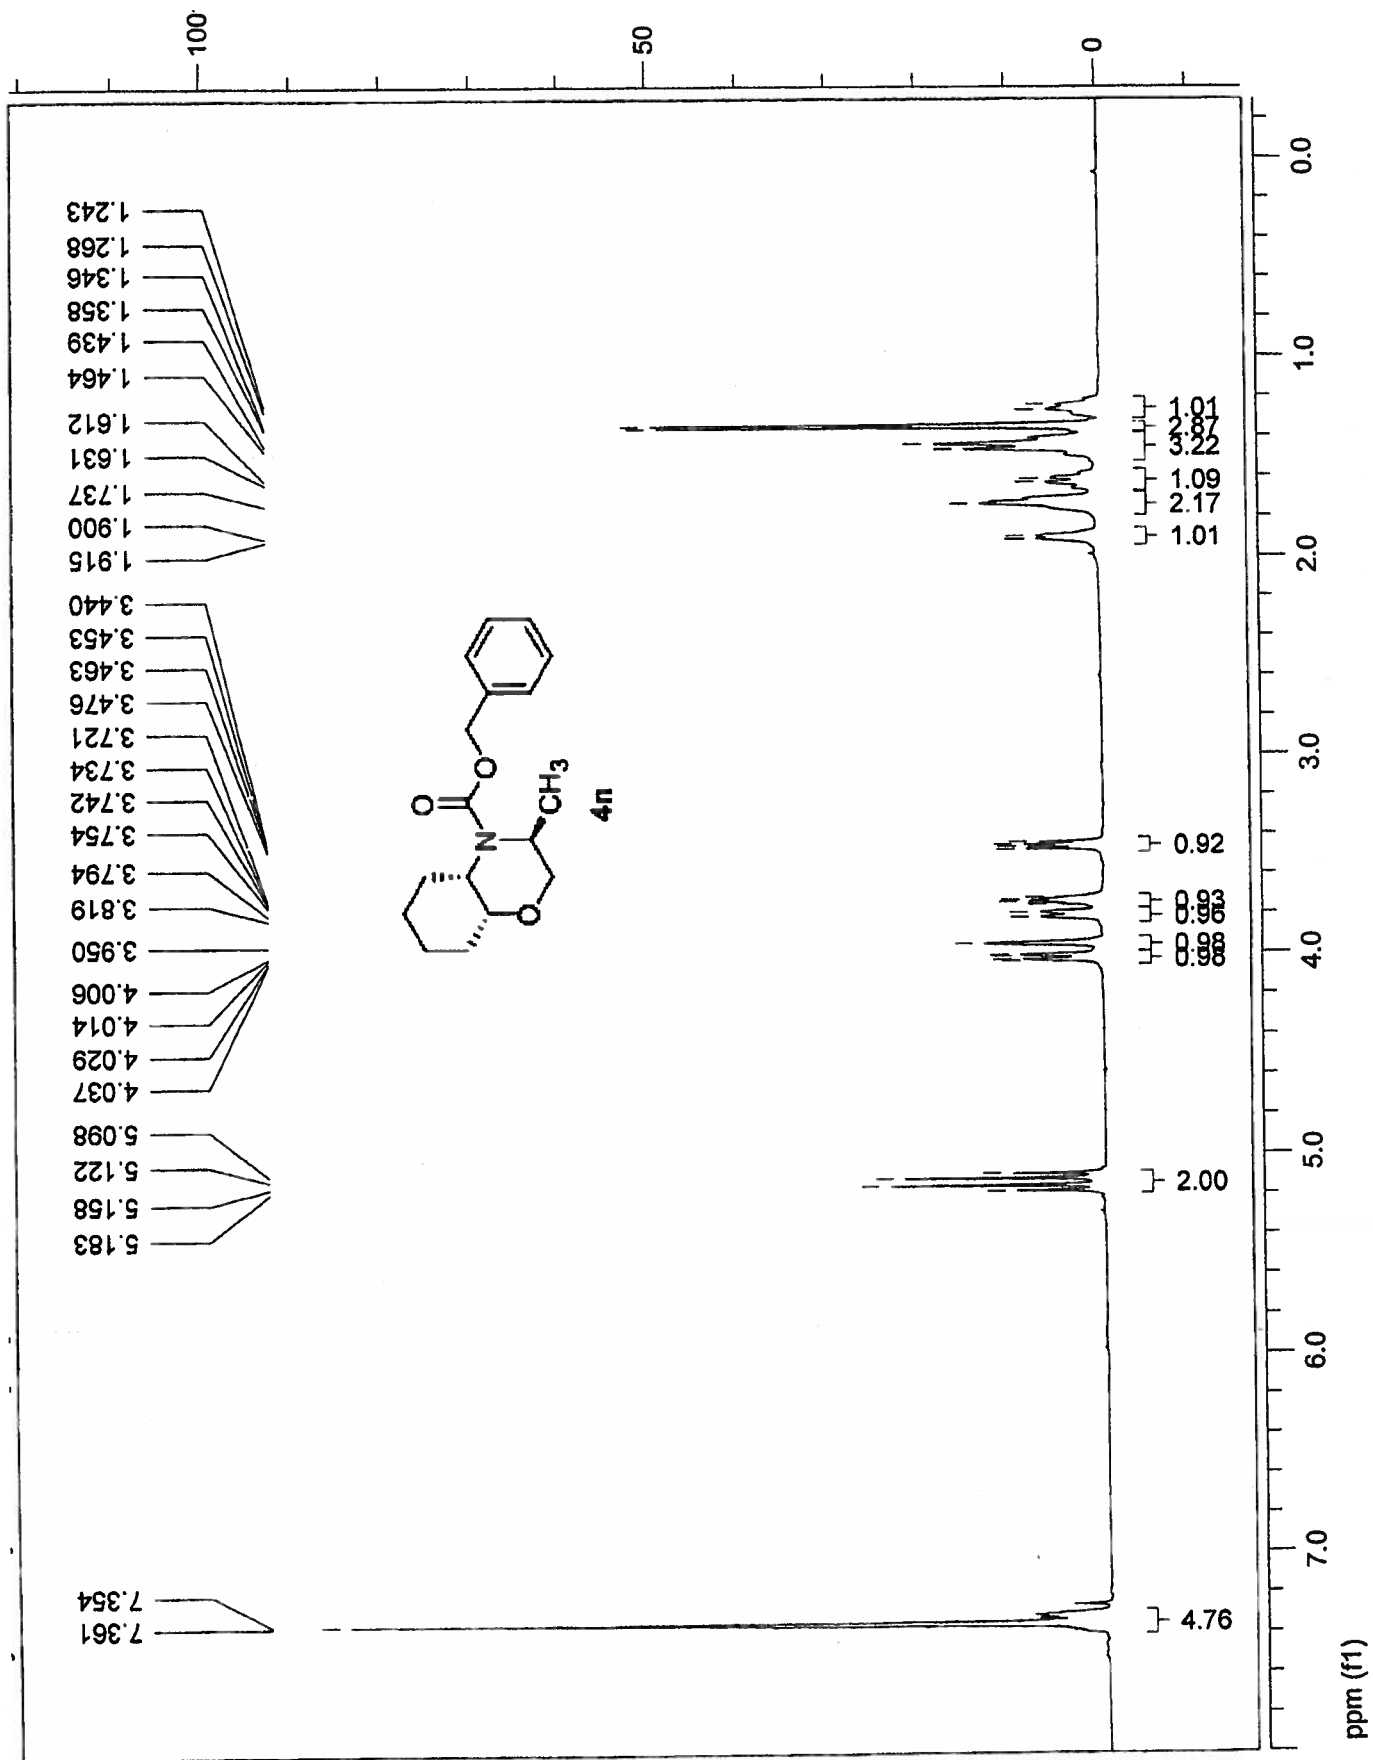

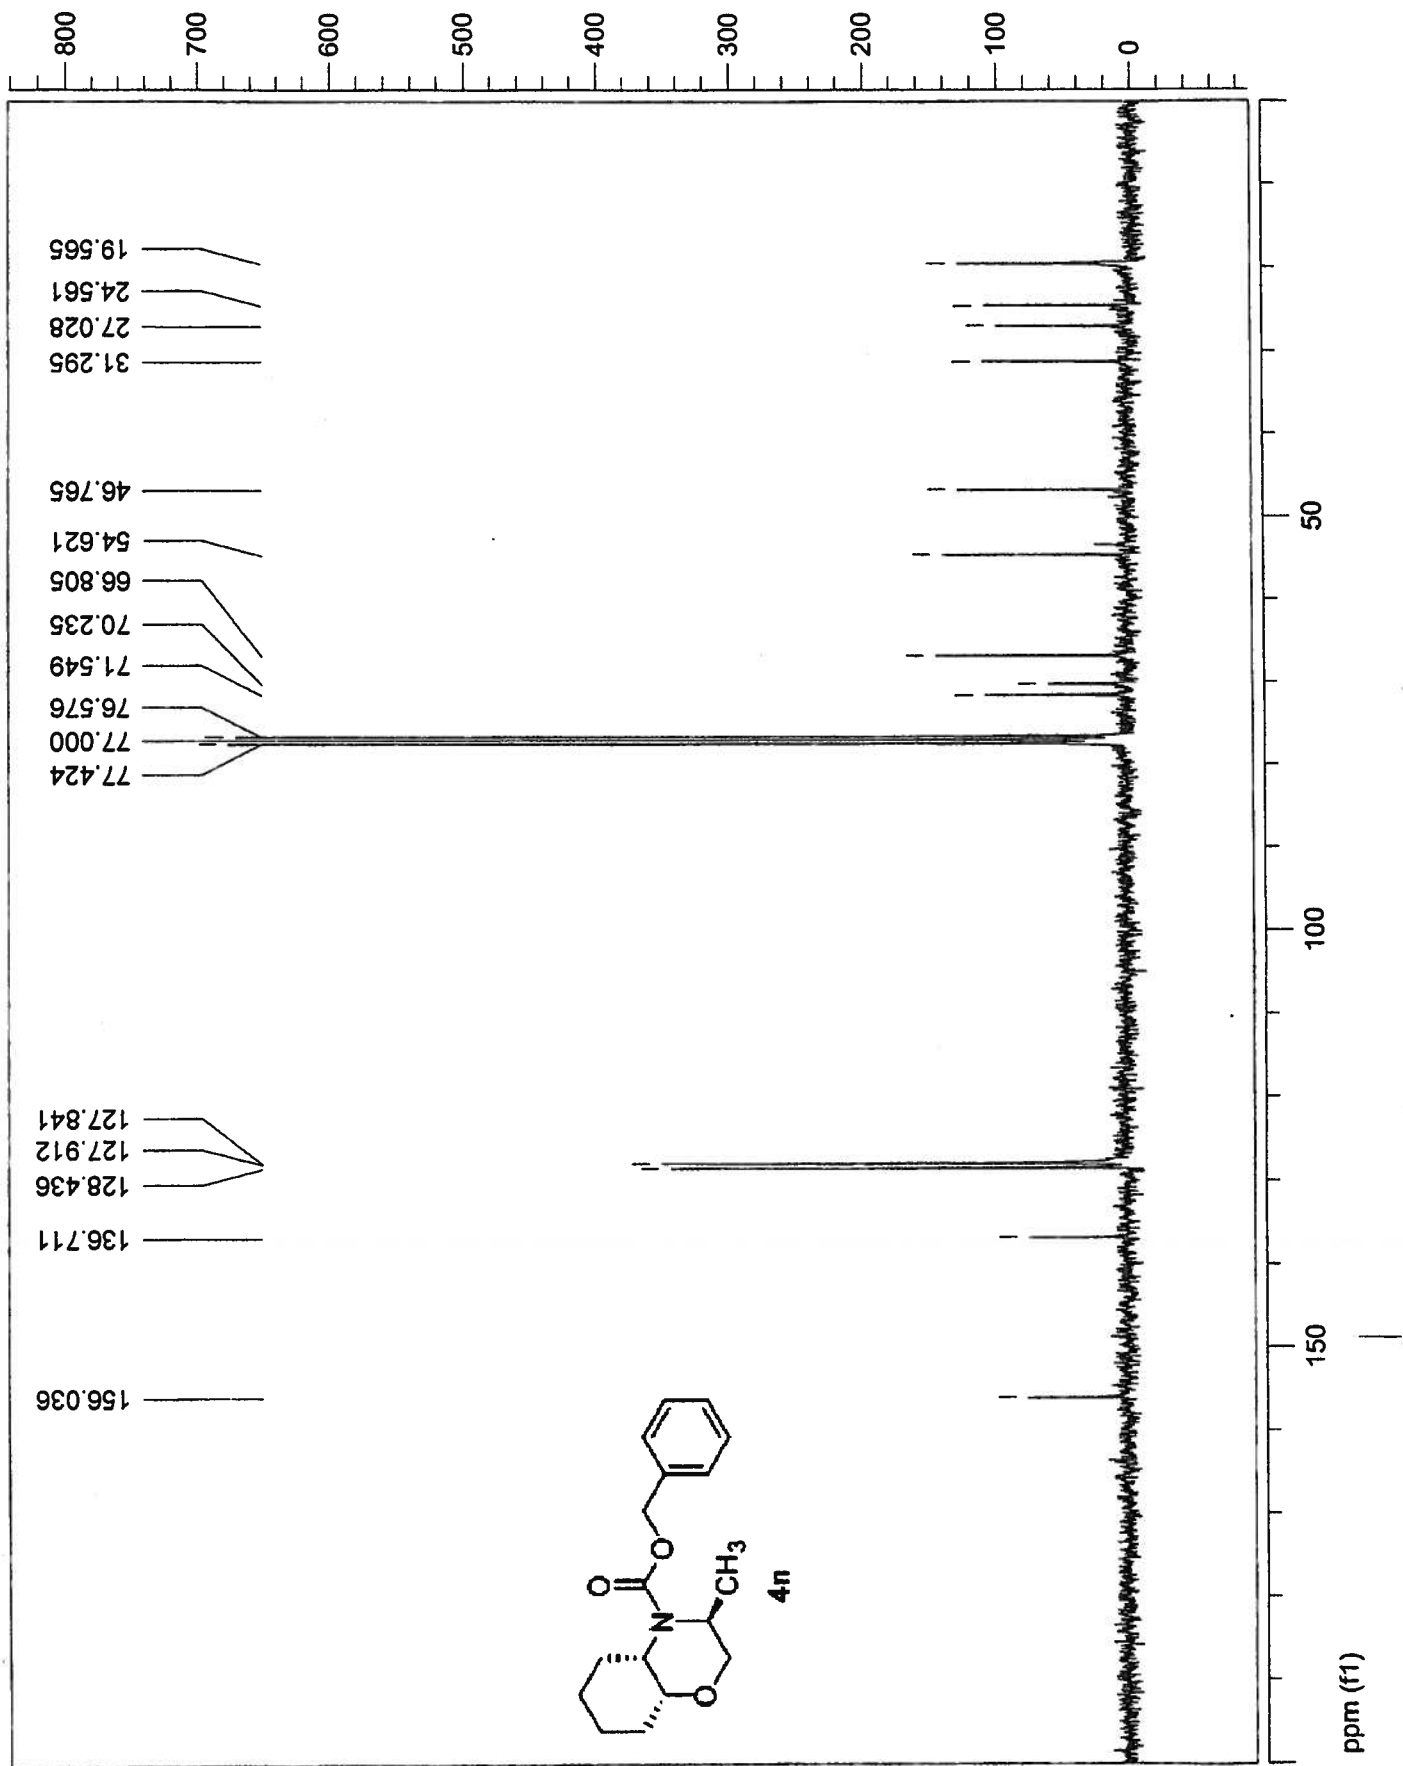

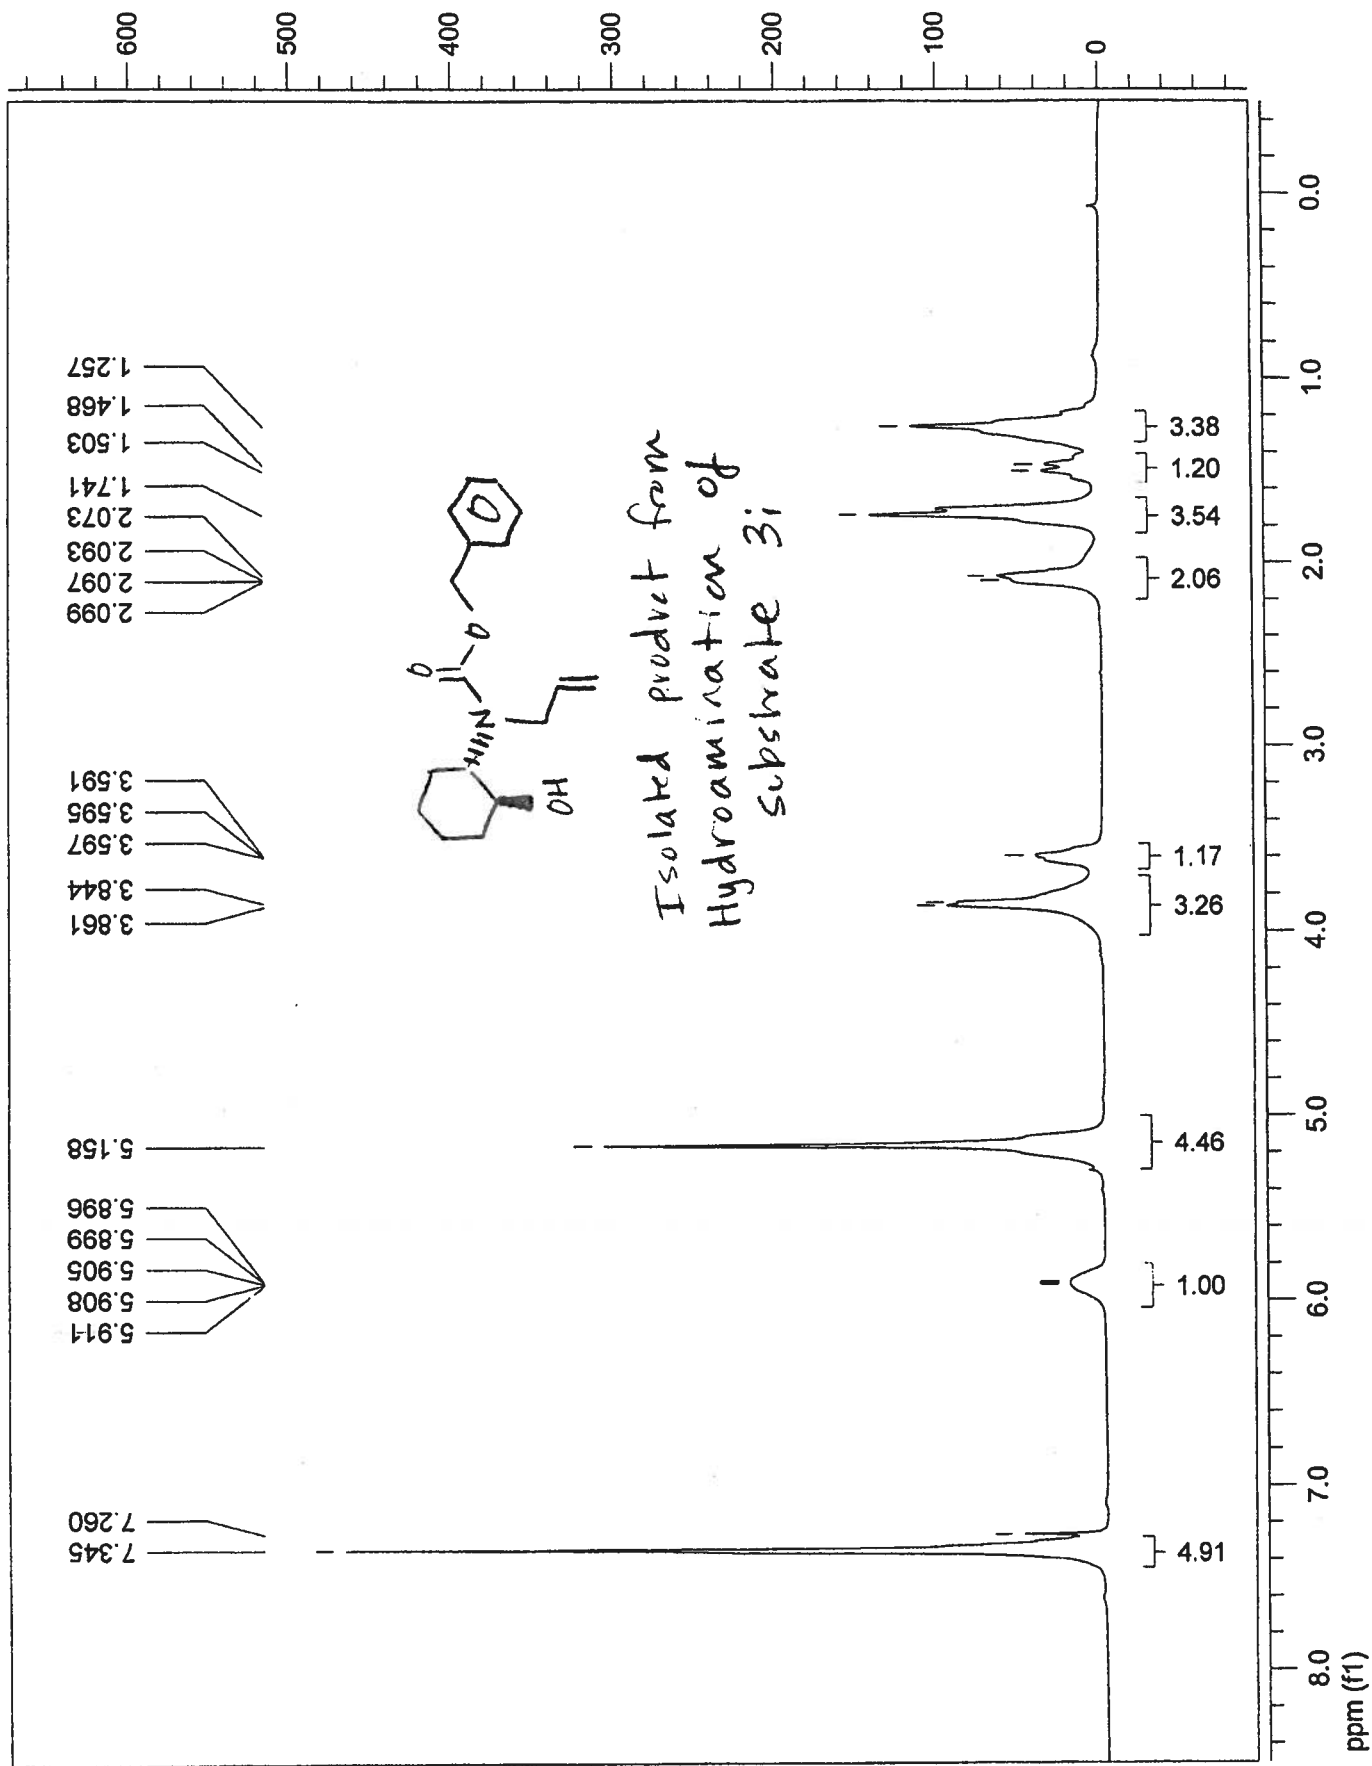

Supplement: c3cc44117b.pdf [file c3cc44117b.pdf]
